# Supplementary material
Source: PubMed Central journal article supplement (PMC3647022)
Supplement: NIHMS429103-supplement-Supp_Table_S1.pdf [file NIHMS429103-supplement-Supp_Table_S1.pdf]

**Supplemental Table 1**

Multivariate Analysis Multivariate model showing SNPs (ranked by p-value) associated with time to CGD, stratified by transplant center. Model also adjusted for confounders such as donor age and recipient characteristics such as African-American race, smoking status, recipient-donor CMV status, and age. Analysis conducted using a Cox proportional hazards model.

| SNP        | Gene    | HR   | 95%<br>Lower<br>CI | 95%<br>Upper<br>CI | P Value  | Minor<br>allele<br>in AA | MAF<br>in AA | Minor<br>allele in<br>non-AA | MAF in<br>non-AA |
|------------|---------|------|--------------------|--------------------|----------|--------------------------|--------------|------------------------------|------------------|
| rs7886938  | FMO6    | 1.60 | 1.26               | 2.04               | 1.47E-04 | A                        | 0.19         | A                            | 0.16             |
| rs7889839  | FMO6    | 1.60 | 1.25               | 2.04               | 1.58E-04 | G                        | 0.19         | G                            | 0.16             |
| rs2272797  | FMO6    | 1.57 | 1.23               | 2.01               | 3.15E-04 | A                        | 0.17         | A                            | 0.16             |
| rs909530   | FMO3    | 1.50 | 1.20               | 1.87               | 3.52E-04 | T                        | 0.48         | T                            | 0.25             |
| rs3769148  | ZAK     | 0.68 | 0.54               | 0.85               | 5.61E-04 | A                        | 0.11         | A                            | 0.47             |
| rs2369679  | AK7     | 1.58 | 1.20               | 2.08               | 1.07E-03 | C                        | 0.03         | C                            | 0.17             |
| rs2239360  | FANCA   | 1.42 | 1.15               | 1.76               | 1.22E-03 | C                        | 0.35         | T                            | 0.34             |
| rs10916    | CYP1B1  | 1.45 | 1.16               | 1.83               | 1.38E-03 | G                        | 0.30         | G                            | 0.21             |
| rs2242480  | CYP3A4  | 1.59 | 1.19               | 2.13               | 1.59E-03 | C                        | 0.29         | T                            | 0.11             |
| rs916864   | PON3    | 0.62 | 0.46               | 0.84               | 1.78E-03 | T                        | 0.09         | T                            | 0.22             |
| rs609636   | CYP4F12 | 0.37 | 0.20               | 0.69               | 1.85E-03 | T                        | 0.07         | T                            | 0.06             |
| rs609290   | CYP4F12 | 0.37 | 0.20               | 0.69               | 1.89E-03 | T                        | 0.07         | T                            | 0.06             |
| rs1639     | PON2    | 0.63 | 0.47               | 0.85               | 2.13E-03 | G                        | 0.10         | G                            | 0.23             |
| rs7190823  | FANCA   | 1.39 | 1.12               | 1.72               | 2.59E-03 | T                        | 0.32         | C                            | 0.42             |
| rs12448860 | FANCA   | 1.37 | 1.11               | 1.69               | 3.17E-03 | T                        | 0.37         | A                            | 0.42             |
| rs2300703  | SRD5A2  | 1.37 | 1.11               | 1.69               | 3.91E-03 | C                        | 0.39         | T                            | 0.43             |
| rs6500452  | FANCA   | 1.37 | 1.11               | 1.70               | 3.98E-03 | C                        | 0.48         | C                            | 0.33             |
| rs2410558  | NAT2    | 1.36 | 1.10               | 1.68               | 5.11E-03 | T                        | 0.40         | T                            | 0.30             |
| rs1800287  | FANCA   | 1.35 | 1.09               | 1.67               | 5.20E-03 | G                        | 0.28         | C                            | 0.42             |
| rs12470143 | SRD5A2  | 0.73 | 0.59               | 0.91               | 5.31E-03 | T                        | 0.31         | T                            | 0.47             |
| rs6196     | NR3C1   | 0.64 | 0.47               | 0.88               | 6.07E-03 | G                        | 0.17         | G                            | 0.15             |
| rs2266780  | FMO3    | 1.44 | 1.11               | 1.87               | 6.19E-03 | G                        | 0.04         | G                            | 0.18             |
| rs1799930  | NAT2    | 0.71 | 0.55               | 0.91               | 6.24E-03 | A                        | 0.32         | A                            | 0.29             |
| rs2794520  | CRP     | 0.73 | 0.58               | 0.92               | 7.06E-03 | T                        | 0.23         | T                            | 0.34             |
| rs4148733  | ABCB1   | 1.46 | 1.10               | 1.92               | 8.00E-03 | C                        | 0.19         | C                            | 0.16             |
| rs3740526  | MMS19   | 1.33 | 1.08               | 1.64               | 8.28E-03 | A                        | 0.20         | A                            | 0.40             |
| rs903881   | ABCC1   | 1.40 | 1.09               | 1.81               | 8.43E-03 | T                        | 0.22         | T                            | 0.19             |
| rs5745325  | MSH4    | 0.72 | 0.56               | 0.92               | 8.53E-03 | A                        | 0.33         | A                            | 0.27             |
| rs12954    | FMO1    | 1.44 | 1.10               | 1.90               | 8.92E-03 | A                        | 0.10         | A                            | 0.15             |
| rs2072374  | NCAPD2  | 0.69 | 0.52               | 0.91               | 9.36E-03 | T                        | 0.05         | T                            | 0.27             |
| rs585890   | SRD5A2  | 0.75 | 0.61               | 0.93               | 9.94E-03 | T                        | 0.43         | T                            | 0.47             |
| rs5759197  | TSPO    | 1.31 | 1.07               | 1.62               | 1.05E-02 | T                        | 0.22         | C                            | 0.35             |
| rs3772173  | SKIL    | 1.35 | 1.07               | 1.70               | 1.07E-02 | T                        | 0.49         | C                            | 0.21             |
| rs1061646  | FANCA   | 1.32 | 1.07               | 1.63               | 1.08E-02 | C                        | 0.45         | T                            | 0.33             |
| rs1205     | CRP     | 0.74 | 0.59               | 0.94               | 1.16E-02 | T                        | 0.20         | T                            | 0.34             |
| rs2229032  | ATR     | 0.65 | 0.47               | 0.91               | 1.21E-02 | A                        | 0.09         | A                            | 0.16             |
| rs4986790  | TLR4    | 0.38 | 0.18               | 0.81               | 1.24E-02 | G                        | 0.05         | G                            | 0.05             |
| rs17780143 | MAP4K5  | 1.68 | 1.12               | 2.52               | 1.28E-02 | A                        | 0.03         | A                            | 0.05             |
| rs1130499  | PTPRN2  | 1.31 | 1.06               | 1.63               | 1.34E-02 | A                        | 0.46         | A                            | 0.33             |
| rs2299267  | PON2    | 0.67 | 0.49               | 0.92               | 1.43E-02 | G                        | 0.12         | G                            | 0.18             |

|            |          |      |      |      |          |   |      |   |      |
|------------|----------|------|------|------|----------|---|------|---|------|
| rs4253211  | ERCC6    | 0.56 | 0.35 | 0.89 | 1.48E-02 | C | 0.02 | C | 0.10 |
| rs11515    | C9orf53  | 1.44 | 1.07 | 1.94 | 1.54E-02 | G | 0.20 | G | 0.12 |
| rs13115754 | PPP3CA   | 1.32 | 1.05 | 1.65 | 1.63E-02 | C | 0.25 | G | 0.31 |
| rs11030918 | RRM1     | 0.76 | 0.61 | 0.95 | 1.63E-02 | C | 0.21 | C | 0.34 |
| rs2070150  | ATF6     | 1.48 | 1.07 | 2.04 | 1.70E-02 | C | 0.06 | C | 0.10 |
| rs3761936  | AP4B1    | 1.37 | 1.06 | 1.77 | 1.70E-02 | C | 0.06 | C | 0.21 |
| rs872723   | SHH      | 1.39 | 1.06 | 1.82 | 1.71E-02 | T | 0.13 | T | 0.17 |
| rs12659    | SLC19A1  | 0.77 | 0.62 | 0.95 | 1.72E-02 | T | 0.47 | T | 0.41 |
| rs419029   | TNFRSF17 | 2.01 | 1.13 | 3.58 | 1.73E-02 | A | 0.09 | A | 0.00 |
| rs1005658  | TSPO     | 1.30 | 1.05 | 1.60 | 1.75E-02 | A | 0.35 | A | 0.30 |
| rs873301   | SUMO3    | 0.65 | 0.46 | 0.93 | 1.81E-02 | T | 0.04 | T | 0.16 |
| rs2602381  | UGT1A10  | 1.31 | 1.05 | 1.65 | 1.82E-02 | C | 0.48 | T | 0.47 |
| rs11765552 | LMTK2    | 0.76 | 0.61 | 0.96 | 1.85E-02 | A | 0.12 | A | 0.49 |
| rs2241279  | FGF6     | 0.77 | 0.61 | 0.96 | 1.87E-02 | T | 0.46 | C | 0.39 |
| rs6413420  | CYP2E1   | 0.43 | 0.21 | 0.87 | 1.89E-02 | T | 0.01 | T | 0.06 |
| rs4952220  | SRD5A2   | 1.28 | 1.04 | 1.58 | 1.91E-02 | A | 0.41 | C | 0.44 |
| rs1564483  | BCL2     | 0.73 | 0.56 | 0.95 | 1.93E-02 | A | 0.09 | A | 0.26 |
| rs1405655  | NR1H2    | 1.29 | 1.04 | 1.59 | 1.94E-02 | C | 0.45 | C | 0.33 |
| rs1881421  | ALK      | 1.28 | 1.04 | 1.57 | 1.94E-02 | C | 0.42 | G | 0.41 |
| rs17112809 | MMS19    | 1.90 | 1.11 | 3.27 | 1.96E-02 | T | 0.12 | T | 0.01 |
| rs1799794  | XRCC3    | 1.32 | 1.04 | 1.67 | 2.05E-02 | G | 0.24 | G | 0.20 |
| rs212082   | ABCC1    | 0.70 | 0.51 | 0.95 | 2.11E-02 | C | 0.11 | C | 0.19 |
| rs2281677  | SLC7A7   | 1.28 | 1.04 | 1.59 | 2.20E-02 | C | 0.48 | T | 0.43 |
| rs246241   | ABCC1    | 1.39 | 1.05 | 1.84 | 2.33E-02 | T | 0.23 | T | 0.12 |
| rs1076153  | DBH      | 1.32 | 1.04 | 1.68 | 2.35E-02 | T | 0.16 | T | 0.21 |
| rs7708626  | RAD50    | 2.13 | 1.10 | 4.12 | 2.42E-02 | A | 0.17 | A | 0.00 |
| rs3803258  | SLC10A2  | 0.71 | 0.52 | 0.96 | 2.42E-02 | C | 0.07 | C | 0.20 |
| rs3794318  | AICDA    | 1.42 | 1.05 | 1.93 | 2.44E-02 | C | 0.37 | C | 0.08 |
| rs1143634  | IL1B     | 0.73 | 0.55 | 0.96 | 2.56E-02 | T | 0.13 | T | 0.23 |
| rs12022378 | AP4B1    | 1.34 | 1.04 | 1.74 | 2.57E-02 | T | 0.06 | T | 0.21 |
| rs1669703  | ADRB3    | 0.78 | 0.63 | 0.97 | 2.58E-02 | T | 0.41 | T | 0.50 |
| rs1071676  | IL1B     | 0.73 | 0.55 | 0.96 | 2.61E-02 | C | 0.13 | C | 0.23 |
| rs504348   | ABCC1    | 1.33 | 1.03 | 1.71 | 2.62E-02 | C | 0.39 | G | 0.16 |
| rs17561    | IL1A     | 0.76 | 0.60 | 0.97 | 2.67E-02 | T | 0.18 | T | 0.29 |
| rs373572   | RAD18    | 1.29 | 1.03 | 1.61 | 2.68E-02 | G | 0.34 | G | 0.29 |
| rs1256061  | ESR2     | 0.79 | 0.64 | 0.97 | 2.75E-02 | A | 0.32 | A | 0.46 |
| rs10479008 | RAD50    | 2.09 | 1.08 | 4.03 | 2.76E-02 | A | 0.18 | A | 0.00 |
| rs6998760  | PSKH2    | 1.28 | 1.03 | 1.59 | 2.76E-02 | A | 0.12 | A | 0.36 |
| rs680695   | MRE11A   | 1.29 | 1.03 | 1.61 | 2.78E-02 | G | 0.19 | G | 0.33 |
| rs1800566  | NQO1     | 1.32 | 1.03 | 1.68 | 2.82E-02 | T | 0.21 | T | 0.20 |
| rs1800286  | FANCA    | 0.77 | 0.61 | 0.97 | 2.86E-02 | A | 0.10 | A | 0.38 |
| rs16836266 | NEK11    | 1.43 | 1.04 | 1.96 | 2.87E-02 | C | 0.29 | C | 0.07 |
| rs1625895  | TP53     | 0.69 | 0.49 | 0.96 | 2.90E-02 | A | 0.27 | A | 0.12 |
| rs1126672  | ADH4     | 0.76 | 0.59 | 0.97 | 2.94E-02 | T | 0.10 | T | 0.27 |
| rs117854   | ABCC1    | 1.29 | 1.03 | 1.62 | 2.96E-02 | G | 0.40 | C | 0.29 |
| rs2070507  | PPM1F    | 1.55 | 1.04 | 2.29 | 2.96E-02 | C | 0.01 | C | 0.05 |
| rs11547160 | TCF7L1   | 1.52 | 1.04 | 2.23 | 3.00E-02 | T | 0.01 | T | 0.06 |
| rs1047768  | ERCC5    | 1.25 | 1.02 | 1.52 | 3.02E-02 | T | 0.32 | T | 0.41 |
| rs708155   | CD81     | 1.32 | 1.03 | 1.69 | 3.12E-02 | A | 0.19 | A | 0.19 |
| rs2384937  | ABCC1    | 1.37 | 1.03 | 1.84 | 3.27E-02 | C | 0.16 | C | 0.11 |

|            |           |      |      |      |          |   |      |   |      |
|------------|-----------|------|------|------|----------|---|------|---|------|
| rs2365778  | SRD5A2    | 0.79 | 0.64 | 0.98 | 3.33E-02 | C | 0.45 | C | 0.49 |
| rs662799   | APOA5     | 1.41 | 1.03 | 1.94 | 3.38E-02 | G | 0.13 | G | 0.07 |
| rs2235047  | ABCB1     | 1.67 | 1.04 | 2.68 | 3.38E-02 | G | 0.16 | G | 0.03 |
| rs2271010  | ATF6      | 1.37 | 1.02 | 1.83 | 3.39E-02 | C | 0.17 | C | 0.12 |
| rs3093106  | CYP4F2    | 1.31 | 1.02 | 1.68 | 3.40E-02 | G | 0.32 | G | 0.18 |
| rs1139488  | ALAD      | 1.26 | 1.02 | 1.56 | 3.41E-02 | C | 0.31 | C | 0.38 |
| rs8016621  | SALL2     | 1.75 | 1.04 | 2.94 | 3.44E-02 | A | 0.18 | A | 0.01 |
| rs17710008 | MYCT1     | 1.35 | 1.02 | 1.79 | 3.49E-02 | A | 0.04 | A | 0.16 |
| rs4986791  | TLR4      | 0.44 | 0.20 | 0.95 | 3.56E-02 | T | 0.01 | T | 0.05 |
| rs11673726 | UGT1A10   | 1.28 | 1.02 | 1.62 | 3.58E-02 | T | 0.36 | T | 0.35 |
| rs1800668  | GPX1      | 0.77 | 0.60 | 0.98 | 3.71E-02 | T | 0.25 | T | 0.28 |
| rs1143623  | IL1B      | 1.28 | 1.01 | 1.62 | 3.81E-02 | C | 0.12 | C | 0.30 |
| rs212079   | ABCC1     | 1.57 | 1.02 | 2.40 | 3.89E-02 | A | 0.03 | A | 0.05 |
| rs3748022  | IKBKE     | 0.75 | 0.57 | 0.99 | 3.95E-02 | T | 0.07 | T | 0.23 |
| rs483536   | NFKBIE    | 0.79 | 0.63 | 0.99 | 3.96E-02 | T | 0.28 | T | 0.35 |
| rs1051296  | SLC19A1   | 0.79 | 0.62 | 0.99 | 3.98E-02 | G | 0.48 | G | 0.42 |
| rs2070677  | CYP2E1    | 0.70 | 0.50 | 0.98 | 3.98E-02 | A | 0.38 | T | 0.12 |
| rs2069718  | IFNG      | 1.24 | 1.01 | 1.52 | 4.02E-02 | C | 0.41 | T | 0.42 |
| rs2241280  | FGF6      | 0.79 | 0.63 | 0.99 | 4.05E-02 | T | 0.50 | C | 0.39 |
| rs3766730  | TNFRSF1B  | 0.72 | 0.52 | 0.99 | 4.07E-02 | T | 0.04 | T | 0.17 |
| rs10263741 | ABCB1     | 2.05 | 1.03 | 4.08 | 4.07E-02 | T | 0.09 | T | 0.00 |
| rs6731242  | UGT1A10   | 0.74 | 0.55 | 0.99 | 4.09E-02 | G | 0.23 | G | 0.17 |
| rs2152092  | MMS19     | 1.24 | 1.01 | 1.52 | 4.10E-02 | T | 0.42 | C | 0.44 |
| rs2242046  | SLC28A1   | 0.80 | 0.64 | 0.99 | 4.13E-02 | T | 0.09 | T | 0.48 |
| rs2043449  | CYP20A1   | 1.51 | 1.02 | 2.23 | 4.15E-02 | G | 0.24 | G | 0.04 |
| rs1851426  | CYP3A4    | 1.49 | 1.02 | 2.17 | 4.16E-02 | C | 0.33 | T | 0.04 |
| rs754      | LOC729296 | 1.37 | 1.01 | 1.84 | 4.24E-02 | G | 0.48 | G | 0.09 |
| rs2909430  | TP53      | 0.70 | 0.49 | 0.99 | 4.25E-02 | G | 0.25 | G | 0.12 |
| UGT2B7_1d  | UGT2B7    | 0.72 | 0.52 | 0.99 | 4.26E-02 | G | 0.09 | G | 0.19 |
| rs2272037  | IGF1R     | 0.79 | 0.64 | 0.99 | 4.29E-02 | G | 0.27 | A | 0.41 |
| rs410509   | EDEM1     | 1.60 | 1.01 | 2.54 | 4.31E-02 | C | 0.12 | C | 0.03 |
| rs1555025  | ID3       | 1.26 | 1.01 | 1.58 | 4.31E-02 | T | 0.35 | T | 0.46 |
| rs1530259  | PPP3CA    | 1.26 | 1.01 | 1.58 | 4.35E-02 | C | 0.22 | G | 0.33 |
| rs2227564  | C10orf55  | 0.76 | 0.58 | 0.99 | 4.44E-02 | T | 0.06 | T | 0.26 |
| rs4646285  | SLC10A1   | 0.61 | 0.38 | 0.99 | 4.44E-02 | A | 0.02 | A | 0.09 |
| rs1801394  | FASTKD3   | 0.80 | 0.64 | 0.99 | 4.49E-02 | G | 0.30 | A | 0.46 |
| rs2007231  | CSDE1     | 0.78 | 0.61 | 0.99 | 4.50E-02 | C | 0.09 | C | 0.35 |
| rs2266782  | FMO3      | 1.23 | 1.00 | 1.50 | 4.51E-02 | A | 0.44 | A | 0.41 |
| rs2235048  | ABCB1     | 0.80 | 0.65 | 1.00 | 4.53E-02 | C | 0.23 | T | 0.47 |
| rs17683288 | ARHGEF10  | 0.59 | 0.35 | 0.99 | 4.56E-02 | G | 0.01 | G | 0.07 |
| rs1051298  | SLC19A1   | 0.80 | 0.64 | 1.00 | 4.59E-02 | C | 0.48 | T | 0.43 |
| rs182482   | ABCC1     | 1.26 | 1.00 | 1.58 | 4.66E-02 | A | 0.49 | G | 0.28 |
| rs3856806  | PPARG     | 1.37 | 1.00 | 1.86 | 4.67E-02 | T | 0.07 | T | 0.14 |
| rs129116   | ABCC1     | 1.26 | 1.00 | 1.58 | 4.68E-02 | C | 0.50 | C | 0.27 |
| rs13712    | MLH3      | 0.80 | 0.64 | 1.00 | 4.72E-02 | G | 0.44 | A | 0.46 |
| rs1045642  | ABCB1     | 0.80 | 0.64 | 1.00 | 4.76E-02 | T | 0.22 | C | 0.47 |
| rs1800469  | B9D2      | 1.26 | 1.00 | 1.58 | 4.78E-02 | T | 0.30 | T | 0.33 |
| rs2301157  | SLC10A2   | 1.25 | 1.00 | 1.56 | 4.78E-02 | C | 0.30 | T | 0.45 |
| rs836802   | MSH3      | 0.76 | 0.58 | 1.00 | 4.84E-02 | G | 0.28 | G | 0.24 |
| rs1171276  | LEPR      | 1.29 | 1.00 | 1.66 | 4.85E-02 | G | 0.42 | G | 0.17 |

|            |          |      |      |      |          |   |      |   |      |
|------------|----------|------|------|------|----------|---|------|---|------|
| rs3770582  | ABCB11   | 1.23 | 1.00 | 1.52 | 4.87E-02 | G | 0.28 | A | 0.42 |
| rs1736565  | FMO6     | 0.80 | 0.65 | 1.00 | 4.91E-02 | C | 0.18 | C | 0.45 |
| rs2259458  | AKR1B1   | 0.78 | 0.61 | 1.00 | 4.92E-02 | T | 0.29 | T | 0.28 |
| rs1805389  | LIG4     | 1.52 | 1.00 | 2.31 | 5.12E-02 | T | 0.00 | T | 0.06 |
| rs2020903  | CASP9    | 1.23 | 1.00 | 1.53 | 5.18E-02 | C | 0.29 | C | 0.48 |
| rs11989    | Magmas   | 1.46 | 1.00 | 2.13 | 5.23E-02 | T | 0.15 | T | 0.06 |
| rs2294038  | ARHGEF10 | 0.71 | 0.51 | 1.00 | 5.23E-02 | C | 0.11 | C | 0.14 |
| rs914358   | AKAP2    | 1.23 | 1.00 | 1.51 | 5.26E-02 | A | 0.48 | G | 0.47 |
| rs4646421  | CYP1A1   | 1.31 | 1.00 | 1.71 | 5.27E-02 | T | 0.37 | T | 0.13 |
| rs2230635  | CHAF1A   | 1.87 | 0.99 | 3.54 | 5.28E-02 | G | 0.07 | G | 0.00 |
| rs3761142  | GSS      | 0.80 | 0.63 | 1.00 | 5.28E-02 | A | 0.32 | A | 0.28 |
| rs915909   | CYP2E1   | 0.14 | 0.02 | 1.03 | 5.32E-02 | T | 0.10 | T | 0.00 |
| rs431240   | SLC36A2  | 0.81 | 0.65 | 1.00 | 5.51E-02 | G | 0.40 | G | 0.44 |
| rs4646032  | CASP9    | 1.23 | 1.00 | 1.52 | 5.51E-02 | C | 0.29 | C | 0.48 |
| rs13321    | TNC      | 1.25 | 0.99 | 1.56 | 5.54E-02 | G | 0.29 | G | 0.28 |
| rs3790433  | LEPR     | 1.24 | 0.99 | 1.56 | 5.60E-02 | G | 0.27 | A | 0.27 |
| rs1364283  | HSD17B2  | 1.23 | 0.99 | 1.53 | 5.64E-02 | A | 0.24 | C | 0.50 |
| rs8044995  | NFATC3   | 0.77 | 0.58 | 1.01 | 5.85E-02 | A | 0.31 | A | 0.17 |
| rs1126670  | ADH4     | 0.79 | 0.62 | 1.01 | 5.85E-02 | G | 0.17 | G | 0.29 |
| rs1881420  | ALK      | 1.24 | 0.99 | 1.54 | 5.88E-02 | G | 0.23 | G | 0.30 |
| rs2740574  | CYP3A4   | 1.45 | 0.99 | 2.12 | 5.88E-02 | A | 0.38 | G | 0.04 |
| rs328      | LPL      | 0.69 | 0.47 | 1.01 | 5.89E-02 | G | 0.10 | G | 0.10 |
| rs9808232  | ROCK2    | 1.24 | 0.99 | 1.54 | 5.93E-02 | T | 0.28 | G | 0.46 |
| rs9332093  | CYP2C9   | 0.59 | 0.35 | 1.02 | 5.95E-02 | G | 0.03 | G | 0.06 |
| rs212086   | ABCC1    | 0.75 | 0.55 | 1.01 | 5.97E-02 | A | 0.11 | A | 0.18 |
| rs1348161  | PPP3CA   | 1.24 | 0.99 | 1.55 | 5.97E-02 | G | 0.27 | A | 0.33 |
| rs743534   | CYP2E1   | 0.73 | 0.52 | 1.01 | 6.01E-02 | T | 0.38 | G | 0.12 |
| rs6427630  | ATF6     | 1.34 | 0.99 | 1.83 | 6.10E-02 | G | 0.14 | G | 0.11 |
| rs12806698 | RRM1     | 0.78 | 0.60 | 1.01 | 6.13E-02 | A | 0.06 | A | 0.28 |
| rs2069807  | IL5      | 1.80 | 0.97 | 3.32 | 6.13E-02 | T | 0.17 | T | 0.00 |
| rs2389603  | ABCB11   | 1.47 | 0.98 | 2.21 | 6.15E-02 | T | 0.21 | T | 0.04 |
| rs1799811  | GSTP1    | 0.64 | 0.40 | 1.02 | 6.18E-02 | T | 0.03 | T | 0.08 |
| rs4646034  | CASP9    | 1.22 | 0.99 | 1.51 | 6.20E-02 | A | 0.29 | A | 0.48 |
| rs1052576  | CASP9    | 1.23 | 0.99 | 1.52 | 6.22E-02 | A | 0.29 | A | 0.48 |
| rs207440   | XDH      | 1.48 | 0.98 | 2.24 | 6.24E-02 | A | 0.07 | A | 0.05 |
| rs1056836  | CYP1B1   | 1.23 | 0.99 | 1.54 | 6.24E-02 | C | 0.19 | G | 0.41 |
| rs500760   | PGR      | 0.79 | 0.61 | 1.01 | 6.34E-02 | G | 0.38 | G | 0.23 |
| rs521102   | CHEK1    | 1.23 | 0.99 | 1.53 | 6.37E-02 | T | 0.30 | C | 0.50 |
| rs2302387  | ABCB4    | 1.30 | 0.99 | 1.70 | 6.40E-02 | A | 0.43 | A | 0.13 |
| rs1041983  | NAT2     | 0.81 | 0.64 | 1.01 | 6.49E-02 | T | 0.49 | T | 0.32 |
| rs2515641  | CYP2E1   | 0.73 | 0.52 | 1.02 | 6.49E-02 | C | 0.38 | T | 0.13 |
| rs6945984  | CYP3A4   | 1.31 | 0.98 | 1.74 | 6.57E-02 | T | 0.34 | C | 0.12 |
| rs163077   | FAM82A   | 1.25 | 0.99 | 1.58 | 6.59E-02 | A | 0.06 | A | 0.28 |
| rs2257212  | SLC15A2  | 0.82 | 0.66 | 1.01 | 6.66E-02 | A | 0.48 | A | 0.43 |
| rs1126671  | ADH4     | 0.80 | 0.63 | 1.02 | 6.68E-02 | A | 0.17 | A | 0.29 |
| rs6971     | TSPO     | 0.79 | 0.61 | 1.02 | 6.71E-02 | T | 0.22 | T | 0.29 |
| rs312016   | LRP5     | 1.23 | 0.99 | 1.53 | 6.74E-02 | A | 0.17 | A | 0.30 |
| rs12500797 | PTPN13   | 1.37 | 0.98 | 1.91 | 6.78E-02 | A | 0.04 | A | 0.09 |
| rs2020895  | CASP9    | 1.22 | 0.99 | 1.51 | 6.79E-02 | T | 0.26 | T | 0.47 |
| rs3822430  | SRD5A1   | 0.82 | 0.66 | 1.01 | 6.81E-02 | C | 0.37 | C | 0.36 |

|            |         |      |      |      |          |   |      |   |      |
|------------|---------|------|------|------|----------|---|------|---|------|
| rs7172     | PSMB4   | 1.24 | 0.98 | 1.55 | 6.93E-02 | A | 0.37 | G | 0.23 |
| rs215101   | ABCC1   | 1.28 | 0.98 | 1.66 | 6.93E-02 | C | 0.21 | C | 0.14 |
| rs2227929  | ATR     | 1.23 | 0.98 | 1.53 | 6.97E-02 | C | 0.19 | C | 0.38 |
| rs1057910  | CYP2C9  | 0.61 | 0.35 | 1.04 | 6.99E-02 | C | 0.02 | C | 0.06 |
| rs1057911  | CYP2C9  | 0.61 | 0.35 | 1.04 | 6.99E-02 | T | 0.02 | T | 0.06 |
| rs7533315  | MTHFR   | 1.21 | 0.98 | 1.49 | 7.03E-02 | T | 0.31 | T | 0.26 |
| rs7668282  | UGT2B7  | 1.72 | 0.96 | 3.10 | 7.06E-02 | C | 0.05 | C | 0.01 |
| rs2240871  | NCAPD2  | 1.29 | 0.98 | 1.69 | 7.16E-02 | G | 0.05 | G | 0.19 |
| rs1799722  | BDKRB2  | 0.80 | 0.63 | 1.02 | 7.20E-02 | T | 0.30 | T | 0.43 |
| rs165815   | ARVCF   | 1.25 | 0.98 | 1.58 | 7.26E-02 | C | 0.47 | C | 0.18 |
| rs1802904  | ATR     | 1.31 | 0.98 | 1.77 | 7.28E-02 | G | 0.04 | G | 0.15 |
| rs1983346  | NDC80   | 0.78 | 0.60 | 1.02 | 7.36E-02 | C | 0.17 | C | 0.23 |
| rs2230129  | TAF1C   | 0.81 | 0.65 | 1.02 | 7.36E-02 | A | 0.21 | A | 0.40 |
| rs16846208 | ATF6    | 1.32 | 0.97 | 1.80 | 7.39E-02 | T | 0.14 | T | 0.10 |
| rs17779352 | AHR     | 0.64 | 0.40 | 1.04 | 7.41E-02 | C | 0.02 | C | 0.09 |
| rs3113199  | HNMT    | 0.45 | 0.19 | 1.08 | 7.42E-02 | T | 0.21 | T | 0.00 |
| rs2271012  | ATF6    | 1.32 | 0.97 | 1.80 | 7.43E-02 | T | 0.14 | T | 0.10 |
| rs660339   | UCP2    | 1.21 | 0.98 | 1.50 | 7.52E-02 | T | 0.43 | T | 0.42 |
| rs1042858  | RRM1    | 1.34 | 0.97 | 1.85 | 7.56E-02 | G | 0.14 | G | 0.08 |
| rs1029702  | NPC2    | 1.24 | 0.98 | 1.58 | 7.56E-02 | A | 0.37 | A | 0.18 |
| rs3735481  | PPIA    | 1.23 | 0.98 | 1.56 | 7.62E-02 | C | 0.40 | A | 0.21 |
| rs5745549  | MSH4    | 1.40 | 0.97 | 2.03 | 7.64E-02 | A | 0.12 | A | 0.04 |
| rs7867504  | SLC28A3 | 1.22 | 0.98 | 1.52 | 7.65E-02 | T | 0.28 | C | 0.31 |
| rs169985   | ABCC1   | 1.24 | 0.98 | 1.57 | 7.72E-02 | A | 0.15 | G | 0.32 |
| rs582054   | IL12A   | 0.82 | 0.66 | 1.02 | 7.74E-02 | A | 0.28 | A | 0.46 |
| rs7751481  | PPARD   | 0.81 | 0.64 | 1.02 | 7.79E-02 | G | 0.36 | A | 0.24 |
| rs630303   | MUS81   | 1.22 | 0.98 | 1.52 | 7.80E-02 | A | 0.26 | G | 0.35 |
| rs3842787  | PTGS1   | 0.66 | 0.41 | 1.05 | 7.81E-02 | T | 0.13 | T | 0.07 |
| rs274548   | SLC22A5 | 1.25 | 0.98 | 1.60 | 7.83E-02 | A | 0.50 | A | 0.15 |
| rs9332098  | CYP2C9  | 0.61 | 0.36 | 1.06 | 7.84E-02 | A | 0.02 | A | 0.06 |
| rs7847     | CHST11  | 1.22 | 0.98 | 1.53 | 7.87E-02 | C | 0.18 | C | 0.32 |
| rs1967120  | ABCC1   | 1.21 | 0.98 | 1.50 | 7.88E-02 | C | 0.39 | C | 0.32 |
| rs8645     | SUMO3   | 0.77 | 0.57 | 1.03 | 7.92E-02 | C | 0.24 | C | 0.17 |
| rs1456432  | CYP1A1  | 1.25 | 0.97 | 1.61 | 7.96E-02 | A | 0.48 | G | 0.17 |
| rs1143671  | SLC15A2 | 0.83 | 0.67 | 1.02 | 8.07E-02 | T | 0.48 | T | 0.43 |
| rs6133     | SELP    | 1.31 | 0.97 | 1.76 | 8.07E-02 | G | 0.47 | T | 0.11 |
| rs1143672  | SLC15A2 | 0.83 | 0.67 | 1.02 | 8.09E-02 | A | 0.48 | A | 0.43 |
| rs1140409  | DDX5    | 0.62 | 0.36 | 1.06 | 8.10E-02 | G | 0.01 | G | 0.06 |
| rs5368     | SELE    | 1.32 | 0.96 | 1.82 | 8.21E-02 | T | 0.07 | T | 0.12 |
| rs582537   | IL12A   | 0.82 | 0.66 | 1.03 | 8.24E-02 | A | 0.28 | A | 0.46 |
| rs2227314  | IL12A   | 0.82 | 0.66 | 1.03 | 8.27E-02 | G | 0.31 | G | 0.46 |
| rs2404955  | CYP3A4  | 1.29 | 0.97 | 1.73 | 8.27E-02 | G | 0.34 | A | 0.13 |
| rs10929302 | UGT1A10 | 1.23 | 0.97 | 1.56 | 8.33E-02 | A | 0.31 | A | 0.30 |
| rs2229086  |         | 1.41 | 0.95 | 2.09 | 8.39E-02 | G | 0.02 | G | 0.06 |
| rs3856748  | CTNNB1  | 1.94 | 0.92 | 4.11 | 8.39E-02 | T | 0.08 | T | 0.00 |
| rs7201683  | WVVOX   | 0.49 | 0.21 | 1.10 | 8.42E-02 | G | 0.10 | G | 0.02 |
| rs2853563  | VDR     | 1.44 | 0.95 | 2.17 | 8.48E-02 | A | 0.20 | A | 0.03 |
| rs2227931  | ATR     | 1.21 | 0.97 | 1.52 | 8.48E-02 | C | 0.19 | C | 0.38 |
| rs2241868  | HMGCS2  | 1.37 | 0.96 | 1.96 | 8.54E-02 | C | 0.07 | C | 0.08 |
| rs299290   | HMMR    | 0.80 | 0.62 | 1.03 | 8.54E-02 | C | 0.31 | C | 0.28 |

|            |         |      |      |      |          |   |      |   |      |
|------------|---------|------|------|------|----------|---|------|---|------|
| rs2293616  | SLC15A2 | 0.83 | 0.67 | 1.03 | 8.58E-02 | T | 0.48 | T | 0.43 |
| rs6474491  | STAR    | 0.80 | 0.62 | 1.03 | 8.62E-02 | C | 0.24 | C | 0.25 |
| rs3136682  | CCL1    | 1.61 | 0.93 | 2.77 | 8.67E-02 | T | 0.07 | T | 0.03 |
| rs540199   | ANKRD49 | 1.21 | 0.97 | 1.51 | 8.82E-02 | G | 0.22 | G | 0.35 |
| rs2307340  | MCM5    | 0.68 | 0.44 | 1.06 | 8.84E-02 | G | 0.02 | G | 0.08 |
| rs2839686  | CXCL12  | 0.82 | 0.65 | 1.03 | 8.92E-02 | T | 0.26 | T | 0.30 |
| rs1052555  | ERCC2   | 0.82 | 0.65 | 1.03 | 8.93E-02 | T | 0.08 | T | 0.32 |
| rs3093105  | CYP4F2  | 1.25 | 0.97 | 1.61 | 8.94E-02 | G | 0.24 | G | 0.18 |
| rs1758566  |         | 0.71 | 0.47 | 1.06 | 9.02E-02 | C | 0.19 | C | 0.09 |
| rs2237580  | PON1    | 0.70 | 0.47 | 1.06 | 9.02E-02 | G | 0.09 | G | 0.11 |
| rs2235074  | ABCB1   | 0.57 | 0.30 | 1.09 | 9.06E-02 | T | 0.11 | T | 0.04 |
| rs10517    | NQO1    | 0.74 | 0.53 | 1.05 | 9.11E-02 | T | 0.16 | T | 0.13 |
| rs1052133  | CAMK1   | 1.24 | 0.97 | 1.58 | 9.15E-02 | G | 0.15 | G | 0.25 |
| rs1800587  | IL1A    | 0.82 | 0.65 | 1.03 | 9.15E-02 | T | 0.35 | T | 0.29 |
| rs673548   | APOB    | 0.80 | 0.62 | 1.04 | 9.21E-02 | A | 0.19 | A | 0.25 |
| rs2299255  | PON1    | 1.27 | 0.96 | 1.69 | 9.29E-02 | C | 0.13 | C | 0.14 |
| rs16944    | IL1B    | 1.20 | 0.97 | 1.49 | 9.29E-02 | G | 0.45 | A | 0.35 |
| rs4994     | ADRB3   | 1.35 | 0.95 | 1.91 | 9.37E-02 | C | 0.12 | C | 0.09 |
| rs5491     | ICAM1   | 1.58 | 0.93 | 2.68 | 9.38E-02 | T | 0.19 | T | 0.01 |
| rs6041750  | FKBP1A  | 0.83 | 0.67 | 1.03 | 9.42E-02 | C | 0.50 | C | 0.37 |
| rs954923   | DPYD    | 1.75 | 0.91 | 3.36 | 9.48E-02 | T | 0.09 | T | 0.00 |
| rs3764006  | SLCO1B3 | 1.28 | 0.96 | 1.72 | 9.54E-02 | T | 0.33 | C | 0.11 |
| rs2234962  | BAG3    | 1.26 | 0.96 | 1.66 | 9.56E-02 | C | 0.03 | C | 0.19 |
| rs4947324  | TNF     | 1.31 | 0.95 | 1.79 | 9.57E-02 | T | 0.15 | T | 0.09 |
| rs1805327  | RAD1    | 1.39 | 0.94 | 2.05 | 9.64E-02 | G | 0.01 | G | 0.08 |
| rs430397   | HSPA5   | 1.34 | 0.95 | 1.90 | 9.73E-02 | A | 0.17 | A | 0.08 |
| rs4149057  | SLCO1B1 | 1.20 | 0.97 | 1.48 | 9.77E-02 | C | 0.21 | T | 0.39 |
| rs5742714  | IGF1    | 0.73 | 0.50 | 1.06 | 9.78E-02 | C | 0.08 | C | 0.10 |
| rs3093662  | TNF     | 1.39 | 0.94 | 2.05 | 9.78E-02 | G | 0.10 | G | 0.06 |
| rs1256063  | ESR2    | 1.34 | 0.95 | 1.89 | 9.92E-02 | T | 0.01 | T | 0.07 |
| rs7195066  | FANCA   | 1.19 | 0.97 | 1.48 | 9.94E-02 | C | 0.35 | T | 0.34 |
| rs1805059  | SLC7A7  | 1.20 | 0.97 | 1.49 | 9.96E-02 | A | 0.48 | G | 0.40 |
| rs5303     | CYP11B1 | 0.83 | 0.66 | 1.04 | 9.97E-02 | T | 0.22 | T | 0.42 |
| rs1143627  | IL1B    | 1.20 | 0.97 | 1.48 | 9.98E-02 | T | 0.41 | C | 0.35 |
| rs13817    | MUS81   | 1.21 | 0.96 | 1.51 | 1.01E-01 | A | 0.27 | G | 0.36 |
| rs557148   | MRE11A  | 1.19 | 0.97 | 1.47 | 1.01E-01 | T | 0.34 | C | 0.44 |
| rs241424   | TAP2    | 1.18 | 0.97 | 1.45 | 1.01E-01 | C | 0.40 | T | 0.48 |
| rs588701   | MRE11A  | 1.20 | 0.96 | 1.50 | 1.01E-01 | A | 0.22 | A | 0.35 |
| rs1470414  | PASK    | 0.82 | 0.64 | 1.04 | 1.02E-01 | A | 0.12 | A | 0.34 |
| rs3218097  | CCND3   | 0.80 | 0.61 | 1.05 | 1.02E-01 | T | 0.10 | T | 0.24 |
| rs3813865  | CYP2E1  | 1.45 | 0.93 | 2.26 | 1.02E-01 | C | 0.14 | C | 0.03 |
| rs10979601 | IKBKAP  | 1.22 | 0.96 | 1.56 | 1.03E-01 | T | 0.43 | T | 0.22 |
| rs4426527  | AGXT    | 0.77 | 0.56 | 1.06 | 1.05E-01 | G | 0.04 | G | 0.19 |
| rs17037102 | DKK2    | 1.31 | 0.95 | 1.80 | 1.05E-01 | A | 0.03 | A | 0.11 |
| rs2306862  | LRP5    | 1.26 | 0.95 | 1.67 | 1.05E-01 | T | 0.05 | T | 0.16 |
| rs1530031  | CHST10  | 0.84 | 0.69 | 1.04 | 1.06E-01 | A | 0.37 | G | 0.48 |
| rs8179183  | LEPR    | 1.24 | 0.96 | 1.60 | 1.07E-01 | C | 0.19 | C | 0.17 |
| rs11188254 | PDLIM1  | 0.83 | 0.66 | 1.04 | 1.07E-01 | A | 0.48 | A | 0.32 |
| rs13652    | FN1     | 1.29 | 0.95 | 1.75 | 1.08E-01 | G | 0.18 | G | 0.12 |
| rs4128473  | DPYD    | 1.26 | 0.95 | 1.68 | 1.09E-01 | C | 0.45 | C | 0.13 |

|            |          |      |      |      |          |   |      |   |      |
|------------|----------|------|------|------|----------|---|------|---|------|
| rs7877     | FMO1     | 1.21 | 0.96 | 1.54 | 1.09E-01 | G | 0.29 | A | 0.27 |
| rs712704   | PAX4     | 1.22 | 0.96 | 1.56 | 1.09E-01 | C | 0.07 | C | 0.23 |
| rs546382   | IGHMBP2  | 1.21 | 0.96 | 1.54 | 1.10E-01 | T | 0.12 | T | 0.29 |
| rs2069443  | CDK5     | 0.83 | 0.65 | 1.04 | 1.10E-01 | C | 0.43 | C | 0.29 |
| rs10733103 | HSD3B1   | 1.20 | 0.96 | 1.50 | 1.10E-01 | G | 0.36 | G | 0.33 |
| rs1887994  | ESR2     | 0.70 | 0.45 | 1.08 | 1.10E-01 | T | 0.05 | T | 0.09 |
| rs523349   | SRD5A2   | 1.20 | 0.96 | 1.51 | 1.11E-01 | G | 0.25 | G | 0.30 |
| rs2056822  | CYP4F8   | 0.81 | 0.62 | 1.05 | 1.11E-01 | A | 0.26 | A | 0.26 |
| rs1448905  | ADAM23   | 0.84 | 0.68 | 1.04 | 1.11E-01 | C | 0.38 | C | 0.41 |
| rs8192879  | CYP7A1   | 1.19 | 0.96 | 1.46 | 1.11E-01 | A | 0.23 | A | 0.41 |
| rs744389   | PRX      | 0.77 | 0.56 | 1.06 | 1.12E-01 | T | 0.02 | T | 0.18 |
| rs1135961  | PSMA7    | 0.76 | 0.55 | 1.07 | 1.12E-01 | T | 0.11 | T | 0.14 |
| rs875120   | TTR      | 0.61 | 0.33 | 1.12 | 1.12E-01 | T | 0.08 | T | 0.04 |
| rs10493753 | SPATA1   | 0.67 | 0.41 | 1.10 | 1.12E-01 | G | 0.27 | G | 0.03 |
| rs1042718  | ADRB2    | 1.23 | 0.95 | 1.58 | 1.13E-01 | A | 0.29 | A | 0.18 |
| rs10176426 | UGT1A10  | 0.71 | 0.47 | 1.08 | 1.13E-01 | T | 0.03 | T | 0.10 |
| rs450808   | ABCG1    | 0.82 | 0.65 | 1.05 | 1.13E-01 | A | 0.34 | A | 0.25 |
| rs2275554  | AK7      | 0.81 | 0.62 | 1.05 | 1.13E-01 | A | 0.21 | A | 0.25 |
| rs2857713  | LTA      | 1.21 | 0.96 | 1.53 | 1.13E-01 | G | 0.32 | G | 0.26 |
| rs5299     | CYP11B1  | 0.83 | 0.67 | 1.04 | 1.14E-01 | A | 0.36 | A | 0.42 |
| rs2305367  | SLC28A1  | 1.19 | 0.96 | 1.47 | 1.15E-01 | T | 0.39 | T | 0.39 |
| rs6068816  | CYP24A1  | 0.74 | 0.51 | 1.08 | 1.15E-01 | T | 0.04 | T | 0.13 |
| rs6945306  | STK31    | 0.83 | 0.65 | 1.05 | 1.16E-01 | C | 0.18 | C | 0.32 |
| rs3097     | CYP11B2  | 0.81 | 0.61 | 1.05 | 1.16E-01 | A | 0.05 | A | 0.26 |
| rs1464645  | BCL6     | 1.24 | 0.95 | 1.62 | 1.16E-01 | T | 0.34 | T | 0.15 |
| rs2230806  | ABCA1    | 0.82 | 0.65 | 1.05 | 1.16E-01 | G | 0.39 | A | 0.27 |
| rs6874005  | NSUN2    | 0.84 | 0.68 | 1.04 | 1.17E-01 | T | 0.31 | T | 0.36 |
| rs816060   | TNFRSF1B | 0.84 | 0.67 | 1.05 | 1.18E-01 | C | 0.12 | C | 0.42 |
| rs310831   | E2F7     | 0.71 | 0.46 | 1.09 | 1.19E-01 | T | 0.02 | T | 0.11 |
| rs2606241  | C18orf56 | 1.19 | 0.96 | 1.49 | 1.19E-01 | T | 0.47 | T | 0.28 |
| rs2310235  | IL1RL2   | 0.83 | 0.65 | 1.05 | 1.19E-01 | T | 0.10 | T | 0.34 |
| rs11568943 | EGF      | 1.31 | 0.93 | 1.83 | 1.19E-01 | A | 0.19 | A | 0.08 |
| rs2243251  | IL4      | 0.47 | 0.18 | 1.22 | 1.20E-01 | G | 0.17 | G | 0.00 |
| rs1709182  | ESR1     | 0.83 | 0.65 | 1.05 | 1.20E-01 | C | 0.11 | C | 0.36 |
| rs10515783 | UBLCP1   | 0.83 | 0.66 | 1.05 | 1.20E-01 | T | 0.17 | T | 0.31 |
| rs7802773  | ABCB1    | 1.19 | 0.96 | 1.47 | 1.20E-01 | A | 0.49 | A | 0.49 |
| rs6019     | F5       | 1.34 | 0.93 | 1.94 | 1.21E-01 | C | 0.32 | C | 0.05 |
| rs2687116  | CYP3A4   | 1.34 | 0.92 | 1.96 | 1.21E-01 | T | 0.40 | G | 0.04 |
| rs2214102  | ABCB1    | 0.71 | 0.46 | 1.10 | 1.22E-01 | A | 0.02 | A | 0.09 |
| rs2239185  | VDR      | 1.18 | 0.96 | 1.46 | 1.22E-01 | C | 0.44 | C | 0.47 |
| rs757158   | PON1     | 0.84 | 0.67 | 1.05 | 1.23E-01 | C | 0.17 | T | 0.45 |
| rs207932   | XRCC5    | 1.18 | 0.96 | 1.45 | 1.23E-01 | T | 0.32 | T | 0.44 |
| rs504122   | SPRY2    | 1.19 | 0.95 | 1.49 | 1.24E-01 | T | 0.09 | T | 0.37 |
| rs1048943  | CYP1A1   | 1.49 | 0.90 | 2.46 | 1.24E-01 | G | 0.01 | G | 0.06 |
| rs5743557  | TLR1     | 0.79 | 0.59 | 1.07 | 1.24E-01 | T | 0.03 | T | 0.20 |
| rs2237585  | PON2     | 0.84 | 0.68 | 1.05 | 1.25E-01 | T | 0.49 | C | 0.47 |
| rs2687105  | CYP3A4   | 1.33 | 0.92 | 1.91 | 1.25E-01 | A | 0.38 | T | 0.05 |
| rs11706052 | IMPDH2   | 0.72 | 0.47 | 1.10 | 1.27E-01 | G | 0.01 | G | 0.10 |
| rs1760215  | DPYD     | 1.33 | 0.92 | 1.92 | 1.27E-01 | G | 0.01 | G | 0.10 |
| rs3803390  | SLC28A1  | 1.40 | 0.91 | 2.16 | 1.28E-01 | A | 0.02 | A | 0.06 |

|            |          |      |      |      |          |   |      |   |      |
|------------|----------|------|------|------|----------|---|------|---|------|
| rs11247367 | IGF1R    | 1.32 | 0.92 | 1.90 | 1.28E-01 | A | 0.11 | A | 0.07 |
| rs12441817 | CYP1A1   | 1.26 | 0.94 | 1.70 | 1.28E-01 | C | 0.21 | C | 0.11 |
| rs679899   | APOB     | 0.84 | 0.67 | 1.05 | 1.28E-01 | A | 0.18 | A | 0.49 |
| rs9862     | SYN3     | 0.85 | 0.68 | 1.05 | 1.28E-01 | T | 0.14 | T | 0.50 |
| rs2515644  | CYP2E1   | 0.81 | 0.62 | 1.06 | 1.29E-01 | C | 0.30 | A | 0.22 |
| rs9640663  | PTPN12   | 1.18 | 0.95 | 1.45 | 1.29E-01 | G | 0.16 | G | 0.39 |
| rs9282574  | ABCG8    | 0.57 | 0.28 | 1.18 | 1.29E-01 | A | 0.06 | A | 0.03 |
| rs1361600  | F3       | 1.18 | 0.95 | 1.46 | 1.30E-01 | A | 0.37 | G | 0.45 |
| rs1042713  | ADRB2    | 0.84 | 0.67 | 1.05 | 1.31E-01 | A | 0.50 | A | 0.37 |
| rs4951629  | ATF3     | 1.33 | 0.92 | 1.92 | 1.31E-01 | C | 0.17 | C | 0.07 |
| rs2069442  | CDK5     | 0.84 | 0.67 | 1.05 | 1.31E-01 | G | 0.42 | G | 0.28 |
| rs2295475  | XDH      | 0.82 | 0.64 | 1.06 | 1.31E-01 | A | 0.06 | A | 0.31 |
| rs6673324  | LEPR     | 1.19 | 0.95 | 1.48 | 1.32E-01 | A | 0.47 | G | 0.47 |
| rs2236654  | IGHMBP2  | 0.81 | 0.61 | 1.07 | 1.32E-01 | A | 0.17 | A | 0.23 |
| rs2463437  | CHST11   | 1.18 | 0.95 | 1.46 | 1.32E-01 | C | 0.36 | C | 0.34 |
| rs2071048  | HNMT     | 0.85 | 0.68 | 1.05 | 1.33E-01 | C | 0.41 | C | 0.41 |
| rs710411   | NOTCH1   | 0.82 | 0.64 | 1.06 | 1.33E-01 | A | 0.46 | G | 0.39 |
| rs2279574  | DUSP6    | 0.84 | 0.68 | 1.05 | 1.33E-01 | A | 0.29 | C | 0.47 |
| rs2839685  | CXCL12   | 1.23 | 0.94 | 1.61 | 1.34E-01 | T | 0.26 | T | 0.14 |
| rs2145853  | ABCC2    | 1.19 | 0.95 | 1.50 | 1.35E-01 | A | 0.40 | A | 0.41 |
| rs2020870  | FMO2     | 0.72 | 0.46 | 1.11 | 1.35E-01 | G | 0.09 | G | 0.07 |
| rs3093153  | CYP4F2   | 0.68 | 0.42 | 1.12 | 1.35E-01 | T | 0.03 | T | 0.06 |
| rs3212860  | CCND1    | 1.73 | 0.84 | 3.56 | 1.35E-01 | T | 0.13 | T | 0.00 |
| rs894469   | FMO5     | 0.73 | 0.48 | 1.10 | 1.35E-01 | G | 0.14 | G | 0.07 |
| rs1952467  | CYP2E1   | 0.82 | 0.62 | 1.07 | 1.36E-01 | G | 0.30 | T | 0.22 |
| rs16941    | BRCA1    | 1.18 | 0.95 | 1.47 | 1.36E-01 | G | 0.18 | G | 0.33 |
| rs1855363  | DPYD     | 1.50 | 0.88 | 2.55 | 1.36E-01 | A | 0.14 | A | 0.01 |
| rs5997917  | LIMK2    | 1.23 | 0.94 | 1.62 | 1.37E-01 | A | 0.44 | A | 0.12 |
| rs2237051  | EGF      | 1.18 | 0.95 | 1.46 | 1.37E-01 | G | 0.22 | A | 0.41 |
| rs569143   | MRE11A   | 1.17 | 0.95 | 1.44 | 1.38E-01 | C | 0.49 | G | 0.44 |
| rs1048691  | MARCH9   | 0.80 | 0.60 | 1.07 | 1.38E-01 | T | 0.36 | T | 0.23 |
| rs2069705  | IFNG     | 1.17 | 0.95 | 1.44 | 1.38E-01 | C | 0.44 | C | 0.36 |
| rs578430   | MUSK     | 1.41 | 0.89 | 2.23 | 1.38E-01 | T | 0.23 | T | 0.02 |
| rs2738258  | CYP3A4   | 1.47 | 0.88 | 2.43 | 1.38E-01 | A | 0.32 | A | 0.00 |
| rs3821207  | IL1RL2   | 0.84 | 0.66 | 1.06 | 1.39E-01 | G | 0.16 | G | 0.34 |
| rs1558093  | SMAD5    | 0.84 | 0.67 | 1.06 | 1.39E-01 | T | 0.45 | C | 0.28 |
| rs2231926  | FLJ10213 | 0.85 | 0.69 | 1.05 | 1.39E-01 | A | 0.35 | A | 0.49 |
| rs7190307  | NFATC3   | 1.18 | 0.95 | 1.46 | 1.40E-01 | G | 0.12 | A | 0.46 |
| rs7563233  | ABCB11   | 1.38 | 0.90 | 2.13 | 1.40E-01 | C | 0.34 | C | 0.02 |
| rs25680    | CD27     | 1.22 | 0.94 | 1.59 | 1.41E-01 | A | 0.15 | A | 0.22 |
| rs1892534  | LEPR     | 1.17 | 0.95 | 1.45 | 1.42E-01 | A | 0.47 | A | 0.41 |
| rs10895068 | PGR      | 1.41 | 0.89 | 2.23 | 1.43E-01 | A | 0.01 | A | 0.05 |
| rs880324   | NFATC2   | 1.20 | 0.94 | 1.54 | 1.43E-01 | A | 0.26 | A | 0.22 |
| rs1800206  | PPARA    | 0.67 | 0.39 | 1.15 | 1.43E-01 | 0 | 0.00 | G | 0.06 |
| rs10521092 | IKBKAP   | 1.54 | 0.86 | 2.76 | 1.43E-01 | T | 0.22 | 0 | 0.00 |
| rs4648058  | NFKB1    | 1.18 | 0.95 | 1.47 | 1.43E-01 | C | 0.24 | C | 0.31 |
| rs3828034  | LEPR     | 1.23 | 0.93 | 1.61 | 1.44E-01 | C | 0.03 | C | 0.17 |
| rs2147668  | RFC3     | 1.23 | 0.93 | 1.61 | 1.44E-01 | T | 0.50 | G | 0.10 |
| rs2074351  | PON1     | 0.84 | 0.66 | 1.06 | 1.44E-01 | A | 0.20 | A | 0.32 |
| rs2335052  | GATA2    | 0.80 | 0.60 | 1.08 | 1.44E-01 | A | 0.23 | A | 0.17 |

|            |          |      |      |      |          |   |      |   |      |
|------------|----------|------|------|------|----------|---|------|---|------|
| rs799917   | BRCA1    | 1.18 | 0.94 | 1.48 | 1.45E-01 | C | 0.18 | T | 0.35 |
| rs1048804  | NRP1     | 0.84 | 0.66 | 1.06 | 1.46E-01 | T | 0.49 | C | 0.25 |
| rs1009373  | CD40     | 1.21 | 0.94 | 1.55 | 1.46E-01 | T | 0.07 | T | 0.25 |
| rs2239184  | VDR      | 1.17 | 0.95 | 1.45 | 1.47E-01 | C | 0.37 | C | 0.46 |
| rs169097   | CXCL12   | 1.68 | 0.83 | 3.39 | 1.47E-01 | A | 0.14 | A | 0.00 |
| rs3770602  | ABCB11   | 0.83 | 0.64 | 1.07 | 1.48E-01 | A | 0.13 | A | 0.30 |
| rs11045819 | SLCO1B1  | 0.79 | 0.57 | 1.09 | 1.48E-01 | A | 0.08 | A | 0.15 |
| rs973013   | HNMT     | 0.83 | 0.64 | 1.07 | 1.48E-01 | T | 0.37 | T | 0.20 |
| rs5490     | ICAM1    | 1.46 | 0.87 | 2.43 | 1.48E-01 | C | 0.20 | C | 0.00 |
| rs6752026  | APOB     | 1.51 | 0.86 | 2.65 | 1.48E-01 | A | 0.15 | A | 0.00 |
| rs8192678  | PPARGC1A | 1.19 | 0.94 | 1.49 | 1.48E-01 | A | 0.09 | A | 0.34 |
| rs2014800  | ABCC1    | 1.17 | 0.95 | 1.44 | 1.48E-01 | T | 0.39 | C | 0.42 |
| rs10759326 | IKBKAP   | 1.20 | 0.94 | 1.53 | 1.48E-01 | G | 0.45 | G | 0.22 |
| rs10146482 | NEK9     | 1.17 | 0.94 | 1.46 | 1.49E-01 | T | 0.34 | T | 0.49 |
| rs1284605  | MBD6     | 0.81 | 0.61 | 1.08 | 1.49E-01 | T | 0.23 | T | 0.16 |
| rs8551     | DPAGT1   | 0.85 | 0.69 | 1.06 | 1.49E-01 | T | 0.28 | T | 0.43 |
| rs3779620  | PBK      | 1.25 | 0.92 | 1.70 | 1.49E-01 | G | 0.27 | G | 0.11 |
| rs5275     | PTGS2    | 0.85 | 0.68 | 1.06 | 1.50E-01 | T | 0.38 | C | 0.36 |
| rs1202283  | ABCB4    | 0.85 | 0.67 | 1.06 | 1.50E-01 | A | 0.11 | G | 0.44 |
| rs2076167  | PPARD    | 0.84 | 0.66 | 1.07 | 1.50E-01 | A | 0.43 | G | 0.23 |
| rs1132054  | SULT2B1  | 1.17 | 0.94 | 1.45 | 1.50E-01 | T | 0.24 | C | 0.44 |
| rs622082   | IGHMBP2  | 1.19 | 0.94 | 1.51 | 1.51E-01 | G | 0.12 | G | 0.29 |
| rs2069763  | IL2      | 1.17 | 0.94 | 1.45 | 1.51E-01 | T | 0.14 | T | 0.36 |
| rs1799966  | BRCA1    | 1.17 | 0.94 | 1.46 | 1.52E-01 | G | 0.23 | G | 0.33 |
| rs6463247  | PPIA     | 1.19 | 0.94 | 1.51 | 1.52E-01 | T | 0.33 | C | 0.22 |
| rs1677649  | MSH3     | 0.83 | 0.65 | 1.07 | 1.53E-01 | A | 0.36 | A | 0.26 |
| rs643788   | DPAGT1   | 0.85 | 0.69 | 1.06 | 1.54E-01 | C | 0.28 | C | 0.43 |
| rs1861494  | IFNG     | 1.18 | 0.94 | 1.49 | 1.54E-01 | C | 0.16 | C | 0.29 |
| rs3100725  | HNMT     | 0.83 | 0.64 | 1.07 | 1.54E-01 | T | 0.26 | T | 0.20 |
| rs2303400  | XRCC5    | 1.17 | 0.94 | 1.44 | 1.54E-01 | C | 0.27 | C | 0.43 |
| rs2228233  | NFATC4   | 1.18 | 0.94 | 1.48 | 1.54E-01 | T | 0.37 | T | 0.29 |
| rs2090949  | CYP3A7   | 1.24 | 0.92 | 1.66 | 1.54E-01 | A | 0.49 | G | 0.10 |
| rs6802898  | PPARG    | 1.22 | 0.93 | 1.59 | 1.54E-01 | C | 0.39 | T | 0.13 |
| rs776746   | CYP3A5   | 1.26 | 0.92 | 1.73 | 1.55E-01 | G | 0.35 | A | 0.08 |
| rs903247   | CHST11   | 1.17 | 0.94 | 1.44 | 1.56E-01 | C | 0.44 | C | 0.36 |
| rs1378321  | HNMT     | 0.83 | 0.63 | 1.08 | 1.56E-01 | C | 0.20 | C | 0.20 |
| rs1357319  | CYP3A7   | 1.24 | 0.92 | 1.66 | 1.57E-01 | C | 0.49 | A | 0.10 |
| rs4525938  | DCK      | 0.76 | 0.52 | 1.11 | 1.57E-01 | T | 0.48 | T | 0.04 |
| rs2857009  | TNXB     | 1.18 | 0.94 | 1.49 | 1.57E-01 | G | 0.06 | G | 0.32 |
| rs1405938  | CASP3    | 1.22 | 0.93 | 1.61 | 1.57E-01 | A | 0.07 | A | 0.18 |
| rs3917724  | SELP     | 1.90 | 0.78 | 4.63 | 1.59E-01 | T | 0.06 | T | 0.00 |
| rs2222411  | CYP3A7   | 1.23 | 0.92 | 1.66 | 1.59E-01 | C | 0.49 | G | 0.10 |
| rs2687142  | CYP3A7   | 1.23 | 0.92 | 1.66 | 1.59E-01 | C | 0.49 | T | 0.10 |
| rs2687145  | CYP3A7   | 1.23 | 0.92 | 1.66 | 1.59E-01 | C | 0.49 | T | 0.10 |
| rs11669576 | LDLR     | 0.71 | 0.44 | 1.15 | 1.59E-01 | A | 0.21 | A | 0.04 |
| rs17064    | ABCB1    | 1.30 | 0.90 | 1.87 | 1.59E-01 | T | 0.16 | T | 0.06 |
| rs2037499  | CYP3A7   | 1.23 | 0.92 | 1.65 | 1.59E-01 | G | 0.49 | C | 0.10 |
| rs2037497  | CYP3A7   | 1.23 | 0.92 | 1.66 | 1.59E-01 | T | 0.49 | C | 0.10 |
| rs524      | PPP1R15A | 0.84 | 0.66 | 1.07 | 1.59E-01 | G | 0.47 | A | 0.25 |
| rs2687140  | CYP3A7   | 1.23 | 0.92 | 1.65 | 1.59E-01 | G | 0.49 | A | 0.11 |

|            |              |      |      |      |          |   |      |   |      |
|------------|--------------|------|------|------|----------|---|------|---|------|
| rs730566   | ATRIP        | 0.84 | 0.66 | 1.07 | 1.60E-01 | T | 0.10 | T | 0.30 |
| rs2687143  | CYP3A7       | 1.23 | 0.92 | 1.65 | 1.60E-01 | A | 0.49 | G | 0.10 |
| rs1799793  | ERCC2        | 0.85 | 0.68 | 1.07 | 1.60E-01 | A | 0.08 | A | 0.35 |
| rs2618346  | DUSP1        | 0.75 | 0.50 | 1.12 | 1.61E-01 | T | 0.04 | T | 0.10 |
| rs8058690  | NFATC3       | 0.81 | 0.61 | 1.09 | 1.62E-01 | G | 0.26 | G | 0.15 |
| rs2278294  | IMPDH1       | 1.17 | 0.94 | 1.47 | 1.62E-01 | A | 0.39 | A | 0.36 |
| rs1327474  | IFNGR1       | 0.85 | 0.67 | 1.07 | 1.62E-01 | G | 0.12 | G | 0.42 |
| rs164938   | TATDN2       | 1.16 | 0.94 | 1.43 | 1.62E-01 | G | 0.40 | T | 0.42 |
| rs212091   | ABCC1        | 0.80 | 0.58 | 1.09 | 1.63E-01 | G | 0.11 | G | 0.16 |
| rs8030950  | IGF1R        | 1.17 | 0.94 | 1.47 | 1.63E-01 | A | 0.38 | A | 0.29 |
| rs1076150  | DBH          | 0.87 | 0.71 | 1.06 | 1.63E-01 | G | 0.49 | G | 0.48 |
| rs715147   | NFATC2       | 0.86 | 0.69 | 1.07 | 1.63E-01 | A | 0.23 | G | 0.50 |
| rs9932251  | NFATC3       | 0.81 | 0.61 | 1.09 | 1.64E-01 | A | 0.26 | A | 0.15 |
| rs1544094  | LOC100130458 | 1.23 | 0.92 | 1.65 | 1.64E-01 | G | 0.42 | C | 0.11 |
| rs2066471  | MTHFR        | 1.20 | 0.93 | 1.55 | 1.64E-01 | A | 0.02 | A | 0.18 |
| rs7759     | DPAGT1       | 0.85 | 0.68 | 1.07 | 1.64E-01 | G | 0.15 | G | 0.37 |
| rs3743135  | PAK6         | 0.76 | 0.52 | 1.12 | 1.64E-01 | G | 0.29 | G | 0.07 |
| rs2070151  | ATF6         | 1.25 | 0.91 | 1.72 | 1.64E-01 | T | 0.15 | T | 0.10 |
| rs3731722  | AOX1         | 0.72 | 0.45 | 1.14 | 1.64E-01 | C | 0.05 | C | 0.08 |
| rs1060584  | FLJ10213     | 0.86 | 0.70 | 1.06 | 1.65E-01 | C | 0.35 | C | 0.49 |
| rs1549758  | NOS3         | 1.19 | 0.93 | 1.52 | 1.66E-01 | T | 0.12 | T | 0.30 |
| rs8191448  | GSTP1        | 0.44 | 0.13 | 1.41 | 1.66E-01 | T | 0.12 | T | 0.00 |
| rs1805388  | LIG4         | 1.20 | 0.93 | 1.56 | 1.66E-01 | T | 0.10 | T | 0.17 |
| rs639838   | PGR          | 1.17 | 0.94 | 1.46 | 1.66E-01 | C | 0.49 | C | 0.30 |
| rs1805016  | IL4R         | 0.73 | 0.47 | 1.14 | 1.67E-01 | G | 0.26 | G | 0.05 |
| rs520354   | APOB         | 0.85 | 0.68 | 1.07 | 1.68E-01 | G | 0.19 | G | 0.49 |
| rs11959820 | PPARGC1B     | 0.70 | 0.42 | 1.16 | 1.68E-01 | A | 0.19 | A | 0.03 |
| rs3775289  | DCK          | 0.74 | 0.49 | 1.13 | 1.69E-01 | G | 0.48 | A | 0.04 |
| rs3100702  | HNMT         | 0.86 | 0.69 | 1.07 | 1.69E-01 | T | 0.32 | T | 0.41 |
| rs2261144  | CYP2A7       | 1.16 | 0.94 | 1.44 | 1.70E-01 | G | 0.19 | G | 0.32 |
| rs3136516  | F2           | 1.17 | 0.94 | 1.45 | 1.71E-01 | A | 0.09 | G | 0.47 |
| rs7386926  | CYP11B1      | 0.86 | 0.69 | 1.07 | 1.72E-01 | A | 0.36 | A | 0.42 |
| rs7698628  | SPARCL1      | 1.17 | 0.93 | 1.47 | 1.73E-01 | G | 0.21 | T | 0.38 |
| rs2235000  | ATM          | 1.79 | 0.77 | 4.15 | 1.73E-01 | A | 0.07 | 0 | 0.00 |
| rs11421    | FCER1G       | 1.21 | 0.92 | 1.60 | 1.74E-01 | C | 0.10 | C | 0.16 |
| rs1800682  | FAS          | 1.16 | 0.94 | 1.43 | 1.74E-01 | T | 0.30 | C | 0.45 |
| rs2740560  | CYP3A7       | 1.22 | 0.92 | 1.63 | 1.74E-01 | T | 0.49 | A | 0.11 |
| rs6898097  | RAD50        | 1.41 | 0.86 | 2.31 | 1.74E-01 | G | 0.42 | G | 0.01 |
| rs568408   | IL12A        | 1.21 | 0.92 | 1.60 | 1.74E-01 | A | 0.20 | A | 0.13 |
| rs4766003  | C12orf32     | 1.17 | 0.93 | 1.46 | 1.74E-01 | G | 0.39 | A | 0.37 |
| rs3204145  | IKBKAP       | 0.83 | 0.63 | 1.09 | 1.74E-01 | A | 0.31 | A | 0.18 |
| rs3740066  | ABCC2        | 1.16 | 0.93 | 1.45 | 1.74E-01 | A | 0.24 | A | 0.37 |
| rs6744284  | UGT1A10      | 1.17 | 0.93 | 1.48 | 1.75E-01 | C | 0.45 | T | 0.29 |
| rs1611755  | SPRR1A       | 0.86 | 0.69 | 1.07 | 1.76E-01 | T | 0.36 | T | 0.45 |
| rs16940    | BRCA1        | 1.17 | 0.93 | 1.45 | 1.76E-01 | C | 0.18 | C | 0.33 |
| rs2304975  | PSMB6        | 0.73 | 0.46 | 1.15 | 1.76E-01 | T | 0.02 | T | 0.09 |
| rs2756105  | ABCC2        | 1.17 | 0.93 | 1.47 | 1.76E-01 | T | 0.24 | T | 0.42 |
| rs2968557  | ADCK2        | 0.81 | 0.59 | 1.10 | 1.76E-01 | A | 0.40 | G | 0.12 |
| rs2230593  | MST1R        | 0.69 | 0.41 | 1.18 | 1.77E-01 | A | 0.01 | A | 0.08 |
| rs2857605  | NFKBIL1      | 0.82 | 0.61 | 1.10 | 1.78E-01 | G | 0.07 | G | 0.19 |

|            |              |      |      |      |          |   |      |   |      |
|------------|--------------|------|------|------|----------|---|------|---|------|
| rs1060915  | BRCA1        | 1.16 | 0.93 | 1.45 | 1.78E-01 | C | 0.18 | C | 0.33 |
| rs1049544  | SPARCL1      | 1.17 | 0.93 | 1.47 | 1.79E-01 | C | 0.20 | G | 0.38 |
| rs1879612  | IGF1R        | 1.15 | 0.94 | 1.42 | 1.80E-01 | T | 0.46 | C | 0.40 |
| rs3743260  | IGF1R        | 1.47 | 0.84 | 2.57 | 1.81E-01 | A | 0.06 | A | 0.03 |
| rs1043720  | ADRB3        | 0.85 | 0.67 | 1.08 | 1.81E-01 | A | 0.12 | A | 0.31 |
| rs2058996  | ABCB11       | 0.85 | 0.68 | 1.08 | 1.81E-01 | A | 0.26 | A | 0.44 |
| rs915057   | SYNE2        | 1.16 | 0.93 | 1.45 | 1.82E-01 | T | 0.12 | T | 0.43 |
| rs2020898  | CASP9        | 1.16 | 0.93 | 1.44 | 1.82E-01 | T | 0.12 | T | 0.45 |
| rs3213469  | ATF6B        | 1.18 | 0.92 | 1.51 | 1.82E-01 | G | 0.05 | G | 0.28 |
| rs1134095  | CYP11B1      | 0.86 | 0.69 | 1.07 | 1.82E-01 | C | 0.36 | C | 0.42 |
| rs1536826  | CYP2E1       | 0.83 | 0.63 | 1.09 | 1.83E-01 | C | 0.22 | A | 0.20 |
| rs4073     | IL8          | 1.16 | 0.93 | 1.44 | 1.83E-01 | T | 0.22 | A | 0.48 |
| rs3748338  | RNASE4       | 0.78 | 0.53 | 1.13 | 1.83E-01 | T | 0.05 | T | 0.16 |
| rs2062541  | ABCC1        | 1.16 | 0.93 | 1.46 | 1.84E-01 | T | 0.49 | C | 0.41 |
| rs717620   | ABCC2        | 1.20 | 0.92 | 1.57 | 1.84E-01 | A | 0.03 | A | 0.19 |
| rs275704   | Intergenic   | 0.84 | 0.64 | 1.09 | 1.84E-01 | C | 0.23 | G | 0.22 |
| rs5918     | ITGB3        | 0.79 | 0.56 | 1.12 | 1.84E-01 | C | 0.09 | C | 0.13 |
| rs2706357  | RAD50        | 1.40 | 0.85 | 2.29 | 1.85E-01 | C | 0.43 | C | 0.01 |
| rs3021094  | IL10         | 0.76 | 0.50 | 1.14 | 1.86E-01 | C | 0.02 | C | 0.10 |
| rs11537643 | VWF          | 0.62 | 0.31 | 1.26 | 1.86E-01 | A | 0.18 | A | 0.00 |
| rs937369   | ABCC1        | 1.15 | 0.93 | 1.43 | 1.86E-01 | G | 0.38 | A | 0.42 |
| rs10895065 | PGR          | 0.85 | 0.67 | 1.08 | 1.87E-01 | A | 0.36 | A | 0.32 |
| rs4886605  | CYP1A1       | 1.18 | 0.92 | 1.52 | 1.87E-01 | C | 0.47 | T | 0.18 |
| rs1926201  | FAS          | 0.87 | 0.70 | 1.07 | 1.87E-01 | C | 0.25 | G | 0.45 |
| rs2295155  | CARD10       | 0.75 | 0.50 | 1.15 | 1.88E-01 | A | 0.02 | A | 0.11 |
| rs1572983  | BAAT         | 0.85 | 0.67 | 1.08 | 1.88E-01 | C | 0.48 | C | 0.32 |
| rs875119   | TTR          | 0.68 | 0.39 | 1.21 | 1.89E-01 | G | 0.08 | G | 0.04 |
| rs1464890  | ZC3HC1       | 0.86 | 0.69 | 1.07 | 1.89E-01 | C | 0.18 | T | 0.41 |
| rs10018297 | Intergenic   | 1.83 | 0.74 | 4.50 | 1.89E-01 | G | 0.08 | G | 0.00 |
| rs268673   | PRX          | 0.86 | 0.70 | 1.07 | 1.89E-01 | G | 0.31 | G | 0.41 |
| rs2308327  | LOC100129103 | 0.77 | 0.52 | 1.14 | 1.90E-01 | G | 0.01 | G | 0.12 |
| rs4348159  | UGT2B7       | 0.77 | 0.52 | 1.14 | 1.91E-01 | T | 0.28 | T | 0.09 |
| rs3808553  | FZD6         | 1.15 | 0.93 | 1.43 | 1.91E-01 | G | 0.29 | G | 0.48 |
| rs1913262  | MGST1        | 0.86 | 0.68 | 1.08 | 1.92E-01 | A | 0.35 | A | 0.29 |
| rs11574528 | MCAT         | 0.84 | 0.65 | 1.09 | 1.92E-01 | T | 0.38 | T | 0.19 |
| rs1801265  | DPYD         | 0.85 | 0.66 | 1.09 | 1.92E-01 | C | 0.38 | C | 0.23 |
| rs1399290  | DPYD         | 1.38 | 0.85 | 2.25 | 1.93E-01 | G | 0.22 | G | 0.01 |
| rs914937   | DPYD         | 1.38 | 0.85 | 2.24 | 1.93E-01 | A | 0.22 | A | 0.01 |
| rs4418320  | CYP11B1      | 1.15 | 0.93 | 1.42 | 1.94E-01 | A | 0.38 | A | 0.50 |
| rs348475   | ALDH1A1      | 0.87 | 0.70 | 1.07 | 1.94E-01 | G | 0.31 | G | 0.48 |
| rs4918907  | PDLIM1       | 0.86 | 0.69 | 1.08 | 1.94E-01 | A | 0.49 | A | 0.32 |
| rs6027     | F5           | 1.31 | 0.87 | 1.98 | 1.95E-01 | G | 0.02 | G | 0.06 |
| rs1514347  | ESR1         | 0.84 | 0.64 | 1.09 | 1.95E-01 | A | 0.12 | A | 0.25 |
| rs11879620 | VRK3         | 1.46 | 0.82 | 2.58 | 1.95E-01 | C | 0.17 | C | 0.00 |
| rs2286940  | MLH1         | 0.86 | 0.69 | 1.08 | 1.95E-01 | T | 0.20 | T | 0.43 |
| rs2074900  | CYP4F2       | 0.84 | 0.65 | 1.09 | 1.95E-01 | A | 0.19 | A | 0.27 |
| rs1126667  | ALOX12       | 1.15 | 0.93 | 1.43 | 1.96E-01 | A | 0.34 | A | 0.42 |
| rs1800686  | CD40         | 1.18 | 0.92 | 1.53 | 1.96E-01 | A | 0.07 | A | 0.25 |
| rs1799998  | CYP11B2      | 1.16 | 0.93 | 1.44 | 1.97E-01 | C | 0.20 | C | 0.44 |
| rs628816   | DPYD         | 0.59 | 0.26 | 1.32 | 1.97E-01 | A | 0.12 | A | 0.01 |

|            |              |      |      |      |          |   |      |   |      |
|------------|--------------|------|------|------|----------|---|------|---|------|
| rs1799949  | BRCA1        | 1.16 | 0.93 | 1.44 | 1.97E-01 | T | 0.22 | T | 0.30 |
| rs5742671  | IGF1         | 0.81 | 0.59 | 1.11 | 1.98E-01 | T | 0.04 | T | 0.16 |
| rs6220     | IGF1         | 0.85 | 0.67 | 1.09 | 1.98E-01 | G | 0.40 | G | 0.28 |
| rs3814058  | NR1I2        | 0.83 | 0.63 | 1.10 | 1.98E-01 | C | 0.44 | C | 0.20 |
| rs1801196  | WRN          | 0.85 | 0.67 | 1.09 | 1.99E-01 | T | 0.25 | T | 0.30 |
| rs6666652  | ABCA4        | 1.27 | 0.88 | 1.83 | 1.99E-01 | A | 0.48 | A | 0.04 |
| rs7761731  | CYP39A1      | 1.16 | 0.92 | 1.45 | 1.99E-01 | A | 0.32 | T | 0.27 |
| rs2069849  | IL6          | 1.39 | 0.84 | 2.28 | 2.00E-01 | T | 0.15 | T | 0.02 |
| rs1053046  | PPARD        | 0.78 | 0.54 | 1.14 | 2.01E-01 | A | 0.47 | A | 0.05 |
| rs6416668  | ABCC6        | 0.51 | 0.18 | 1.44 | 2.01E-01 | T | 0.09 | T | 0.00 |
| rs874305   | IGF1R        | 0.87 | 0.69 | 1.08 | 2.01E-01 | A | 0.45 | A | 0.40 |
| rs5301     | CYP11B1      | 1.15 | 0.93 | 1.42 | 2.01E-01 | G | 0.37 | G | 0.50 |
| rs1148555  | MBD6         | 0.83 | 0.62 | 1.11 | 2.02E-01 | G | 0.18 | G | 0.16 |
| rs1538660  | IKBKAP       | 0.84 | 0.64 | 1.10 | 2.02E-01 | T | 0.30 | T | 0.18 |
| rs1049434  | SLC16A1      | 0.87 | 0.69 | 1.08 | 2.02E-01 | T | 0.16 | T | 0.43 |
| rs7169     | SLC16A1      | 0.87 | 0.69 | 1.08 | 2.02E-01 | C | 0.16 | C | 0.43 |
| rs3918022  | CCNK         | 1.14 | 0.93 | 1.41 | 2.02E-01 | G | 0.35 | G | 0.43 |
| rs1913263  | MGST1        | 0.86 | 0.68 | 1.09 | 2.02E-01 | G | 0.35 | G | 0.29 |
| rs4148949  | CHST3        | 0.87 | 0.70 | 1.08 | 2.02E-01 | T | 0.16 | T | 0.42 |
| rs2237586  | PON2         | 1.17 | 0.92 | 1.50 | 2.03E-01 | T | 0.19 | T | 0.23 |
| rs3258     | FDFT1        | 1.15 | 0.93 | 1.44 | 2.03E-01 | C | 0.35 | C | 0.38 |
| rs2234693  | ESR1         | 0.87 | 0.70 | 1.08 | 2.03E-01 | T | 0.45 | C | 0.46 |
| rs3811740  | PLK4         | 0.86 | 0.68 | 1.09 | 2.04E-01 | A | 0.18 | A | 0.32 |
| rs2266691  | CCNH         | 1.82 | 0.72 | 4.59 | 2.04E-01 | G | 0.06 | 0 | 0.00 |
| rs3791981  | APOB         | 1.22 | 0.90 | 1.64 | 2.05E-01 | G | 0.42 | G | 0.10 |
| rs2582790  | HMGCS2       | 0.86 | 0.68 | 1.09 | 2.05E-01 | T | 0.37 | T | 0.30 |
| rs4437575  | ABCB1        | 1.15 | 0.92 | 1.44 | 2.06E-01 | G | 0.38 | G | 0.43 |
| rs2066494  | RAD9A        | 1.49 | 0.80 | 2.76 | 2.06E-01 | C | 0.06 | C | 0.02 |
| rs13035    | PYROXD1      | 1.15 | 0.93 | 1.42 | 2.06E-01 | C | 0.17 | C | 0.44 |
| rs3100701  | HNMT         | 0.87 | 0.70 | 1.08 | 2.07E-01 | T | 0.30 | T | 0.41 |
| rs917394   | NPC2         | 0.87 | 0.70 | 1.08 | 2.07E-01 | T | 0.29 | T | 0.39 |
| rs4619     | IGFBP1       | 1.15 | 0.93 | 1.42 | 2.08E-01 | G | 0.46 | G | 0.37 |
| rs17012739 | PLK4         | 0.86 | 0.68 | 1.09 | 2.08E-01 | G | 0.18 | G | 0.32 |
| rs9808753  | IFNGR2       | 1.19 | 0.91 | 1.57 | 2.08E-01 | G | 0.18 | G | 0.14 |
| rs6911817  | PPARD        | 0.71 | 0.42 | 1.21 | 2.08E-01 | T | 0.27 | T | 0.02 |
| rs730821   | SIRT1        | 1.17 | 0.92 | 1.50 | 2.08E-01 | G | 0.26 | G | 0.23 |
| rs12680    | LOC100129773 | 1.27 | 0.87 | 1.86 | 2.09E-01 | C | 0.28 | C | 0.08 |
| rs246234   | ABCC1        | 1.16 | 0.92 | 1.47 | 2.09E-01 | G | 0.48 | C | 0.32 |
| rs216321   | VWF          | 1.25 | 0.88 | 1.75 | 2.09E-01 | T | 0.03 | T | 0.09 |
| rs439132   | LIG1         | 1.41 | 0.83 | 2.39 | 2.09E-01 | G | 0.22 | G | 0.01 |
| rs757081   | NUCB2        | 1.17 | 0.92 | 1.48 | 2.11E-01 | C | 0.10 | C | 0.33 |
| rs1799950  | BRCA1        | 0.73 | 0.45 | 1.19 | 2.11E-01 | G | 0.01 | G | 0.07 |
| rs1548216  | IL6          | 1.31 | 0.86 | 1.99 | 2.12E-01 | C | 0.20 | C | 0.02 |
| rs12713450 | APOB         | 1.74 | 0.73 | 4.13 | 2.12E-01 | T | 0.09 | T | 0.00 |
| rs3842     | ABCB1        | 1.20 | 0.90 | 1.61 | 2.13E-01 | G | 0.19 | G | 0.13 |
| rs7843746  | C8orf68      | 0.86 | 0.68 | 1.09 | 2.13E-01 | T | 0.50 | C | 0.24 |
| rs827423   | ESR1         | 1.15 | 0.92 | 1.42 | 2.14E-01 | T | 0.38 | C | 0.49 |
| rs2301159  | SLC10A2      | 1.16 | 0.92 | 1.45 | 2.14E-01 | T | 0.33 | T | 0.25 |
| rs3212254  | ADCY4        | 1.27 | 0.87 | 1.84 | 2.14E-01 | A | 0.19 | A | 0.05 |
| rs5742667  | IGF1         | 0.86 | 0.67 | 1.09 | 2.14E-01 | T | 0.36 | T | 0.26 |

|            |          |      |      |      |          |   |      |   |      |
|------------|----------|------|------|------|----------|---|------|---|------|
| rs2231924  | FLJ10213 | 0.87 | 0.71 | 1.08 | 2.14E-01 | T | 0.36 | T | 0.48 |
| rs296365   | SULT2A1  | 0.86 | 0.68 | 1.09 | 2.15E-01 | C | 0.50 | G | 0.27 |
| rs3803036  | PTPRR    | 0.85 | 0.65 | 1.10 | 2.15E-01 | G | 0.40 | A | 0.20 |
| rs2291462  | IL17RD   | 0.84 | 0.64 | 1.11 | 2.15E-01 | T | 0.35 | T | 0.14 |
| rs2302524  | PLAUR    | 0.83 | 0.62 | 1.12 | 2.15E-01 | C | 0.22 | C | 0.17 |
| rs2288550  | IMPDH1   | 0.83 | 0.61 | 1.12 | 2.16E-01 | C | 0.08 | C | 0.18 |
| rs2276299  | SLC22A8  | 1.19 | 0.90 | 1.56 | 2.16E-01 | T | 0.07 | T | 0.19 |
| rs4647688  | CASP3    | 1.20 | 0.90 | 1.59 | 2.16E-01 | A | 0.03 | A | 0.18 |
| rs3218171  | E2F2     | 0.87 | 0.69 | 1.09 | 2.17E-01 | T | 0.08 | G | 0.50 |
| rs1544410  | VDR      | 0.87 | 0.70 | 1.08 | 2.17E-01 | A | 0.26 | A | 0.39 |
| rs2706364  | RAD50    | 1.36 | 0.83 | 2.23 | 2.17E-01 | A | 0.43 | A | 0.01 |
| rs3741378  | SIPA1    | 0.82 | 0.60 | 1.13 | 2.17E-01 | A | 0.28 | A | 0.13 |
| rs308394   | FGF2     | 1.43 | 0.81 | 2.51 | 2.18E-01 | C | 0.12 | C | 0.01 |
| rs2278293  | IMPDH1   | 1.15 | 0.92 | 1.42 | 2.18E-01 | A | 0.48 | A | 0.46 |
| rs7441750  | UGT2B7   | 1.15 | 0.92 | 1.42 | 2.18E-01 | G | 0.26 | A | 0.48 |
| rs1573496  | ADH7     | 0.78 | 0.52 | 1.16 | 2.19E-01 | G | 0.02 | G | 0.09 |
| rs3742106  | ABCC4    | 0.87 | 0.70 | 1.08 | 2.19E-01 | C | 0.36 | C | 0.39 |
| rs16754    | WT1      | 1.18 | 0.90 | 1.55 | 2.19E-01 | G | 0.16 | G | 0.15 |
| rs1134921  | GAK      | 0.81 | 0.59 | 1.13 | 2.19E-01 | A | 0.01 | A | 0.14 |
| rs1962     | THBD     | 1.16 | 0.91 | 1.49 | 2.20E-01 | C | 0.36 | C | 0.24 |
| rs1048201  | FGF2     | 0.83 | 0.62 | 1.12 | 2.20E-01 | T | 0.07 | T | 0.18 |
| rs2239330  | ABCC1    | 1.17 | 0.91 | 1.50 | 2.21E-01 | T | 0.12 | T | 0.29 |
| rs1951765  | FKBP1A   | 1.16 | 0.92 | 1.46 | 2.21E-01 | A | 0.16 | A | 0.25 |
| rs854570   | PON1     | 1.15 | 0.92 | 1.43 | 2.22E-01 | A | 0.28 | C | 0.38 |
| rs2839668  | MYO3A    | 0.77 | 0.50 | 1.17 | 2.22E-01 | G | 0.08 | G | 0.09 |
| rs1751034  | ABCC4    | 1.18 | 0.90 | 1.54 | 2.22E-01 | C | 0.30 | C | 0.20 |
| rs217434   | NPC1L1   | 0.84 | 0.64 | 1.11 | 2.23E-01 | G | 0.16 | G | 0.20 |
| rs7009367  | C8orf68  | 0.85 | 0.66 | 1.10 | 2.23E-01 | G | 0.45 | G | 0.18 |
| rs2375005  | PON2     | 0.87 | 0.71 | 1.09 | 2.23E-01 | T | 0.42 | A | 0.48 |
| rs1364726  | XRCC5    | 1.21 | 0.89 | 1.66 | 2.24E-01 | T | 0.18 | T | 0.13 |
| rs853778   | ABCB11   | 0.88 | 0.71 | 1.08 | 2.24E-01 | G | 0.49 | A | 0.44 |
| rs11582663 | FCRL4    | 0.81 | 0.58 | 1.14 | 2.25E-01 | T | 0.04 | T | 0.14 |
| rs2479383  | PSMB4    | 1.18 | 0.90 | 1.55 | 2.25E-01 | C | 0.08 | C | 0.18 |
| rs1587241  | PPP3CA   | 0.86 | 0.68 | 1.10 | 2.26E-01 | C | 0.48 | G | 0.28 |
| rs7987433  | SLC10A2  | 1.20 | 0.89 | 1.61 | 2.26E-01 | C | 0.19 | C | 0.14 |
| rs398700   | RUNDC2A  | 1.18 | 0.90 | 1.55 | 2.26E-01 | G | 0.43 | G | 0.17 |
| rs484066   | ABCB11   | 0.88 | 0.71 | 1.09 | 2.26E-01 | A | 0.45 | T | 0.36 |
| rs496190   | MRE11A   | 1.14 | 0.92 | 1.40 | 2.26E-01 | T | 0.34 | C | 0.46 |
| rs43037    | PON2     | 1.14 | 0.92 | 1.43 | 2.27E-01 | C | 0.20 | C | 0.38 |
| rs1413228  | DPYD     | 1.21 | 0.89 | 1.65 | 2.27E-01 | G | 0.27 | G | 0.09 |
| rs2020917  | COMT     | 0.85 | 0.66 | 1.10 | 2.27E-01 | T | 0.11 | T | 0.27 |
| rs1050900  | HNMT     | 0.85 | 0.65 | 1.11 | 2.27E-01 | A | 0.16 | A | 0.20 |
| rs2243248  | IL4      | 0.78 | 0.52 | 1.17 | 2.28E-01 | G | 0.16 | G | 0.08 |
| rs2235041  | ABCB1    | 1.71 | 0.71 | 4.10 | 2.28E-01 | T | 0.07 | T | 0.00 |
| rs35597    | ABCC1    | 0.88 | 0.71 | 1.09 | 2.28E-01 | A | 0.30 | A | 0.47 |
| rs228851   | NFATC2   | 0.87 | 0.70 | 1.09 | 2.29E-01 | T | 0.11 | T | 0.48 |
| rs1540339  | VDR      | 1.13 | 0.92 | 1.39 | 2.29E-01 | A | 0.24 | A | 0.37 |
| rs434455   | RUNDC2A  | 1.17 | 0.90 | 1.52 | 2.29E-01 | T | 0.43 | T | 0.16 |
| rs3181366  | TNFSF8   | 0.88 | 0.71 | 1.09 | 2.30E-01 | T | 0.26 | T | 0.43 |
| rs676210   | APOB     | 0.85 | 0.65 | 1.11 | 2.30E-01 | A | 0.14 | A | 0.25 |

|            |            |      |      |      |          |   |      |   |      |
|------------|------------|------|------|------|----------|---|------|---|------|
| rs2075685  | TMEM167    | 0.88 | 0.71 | 1.09 | 2.30E-01 | G | 0.43 | T | 0.45 |
| rs1496496  | IGFBP3     | 1.14 | 0.92 | 1.43 | 2.30E-01 | G | 0.44 | G | 0.37 |
| rs7515157  | FMO2       | 0.87 | 0.69 | 1.09 | 2.30E-01 | T | 0.49 | T | 0.29 |
| rs398734   | CD44       | 1.15 | 0.91 | 1.46 | 2.30E-01 | A | 0.47 | A | 0.27 |
| rs1050891  | HNMT       | 0.85 | 0.65 | 1.11 | 2.30E-01 | C | 0.16 | C | 0.20 |
| rs268687   | SERTAD1    | 1.15 | 0.92 | 1.44 | 2.31E-01 | A | 0.14 | A | 0.47 |
| rs3739942  | KIAA1984   | 1.15 | 0.92 | 1.44 | 2.32E-01 | G | 0.24 | G | 0.27 |
| rs4987131  | CYBA       | 0.43 | 0.11 | 1.73 | 2.33E-01 | C | 0.11 | C | 0.00 |
| rs10034373 | WHSC1      | 0.50 | 0.16 | 1.57 | 2.33E-01 | T | 0.12 | O | 0.00 |
| rs10018198 | Intergenic | 1.17 | 0.90 | 1.52 | 2.34E-01 | C | 0.08 | C | 0.23 |
| rs11572081 | CYP2C8     | 1.53 | 0.76 | 3.08 | 2.34E-01 | A | 0.17 | A | 0.00 |
| rs1199039  | TIE1       | 1.14 | 0.92 | 1.42 | 2.34E-01 | C | 0.18 | C | 0.39 |
| rs28900388 | UGT1A10    | 0.41 | 0.09 | 1.79 | 2.34E-01 | C | 0.07 | C | 0.00 |
| rs16938893 | GDAP1      | 1.15 | 0.91 | 1.45 | 2.34E-01 | G | 0.11 | G | 0.34 |
| rs1870377  | KDR        | 1.17 | 0.90 | 1.51 | 2.35E-01 | A | 0.12 | A | 0.25 |
| rs773902   | F2RL3      | 0.85 | 0.64 | 1.11 | 2.35E-01 | G | 0.46 | A | 0.18 |
| rs10248420 | ABCB1      | 1.18 | 0.90 | 1.55 | 2.35E-01 | G | 0.47 | G | 0.16 |
| rs6714486  | UGT1A10    | 1.25 | 0.86 | 1.82 | 2.35E-01 | A | 0.17 | A | 0.06 |
| rs3024496  | IL10       | 0.88 | 0.71 | 1.09 | 2.35E-01 | C | 0.43 | C | 0.45 |
| rs2071421  | ARSA       | 1.20 | 0.89 | 1.62 | 2.35E-01 | G | 0.24 | G | 0.14 |
| rs543304   | BRCA2      | 1.18 | 0.90 | 1.54 | 2.35E-01 | C | 0.17 | C | 0.18 |
| rs3739922  | SETX       | 1.29 | 0.85 | 1.96 | 2.35E-01 | G | 0.07 | G | 0.05 |
| rs1417938  | CRP        | 1.15 | 0.91 | 1.44 | 2.36E-01 | A | 0.12 | A | 0.30 |
| rs7602171  | ABCB11     | 0.86 | 0.66 | 1.11 | 2.36E-01 | A | 0.12 | A | 0.29 |
| rs769218   | CAT        | 0.85 | 0.64 | 1.12 | 2.37E-01 | A | 0.15 | A | 0.22 |
| rs207921   | XRCC5      | 1.14 | 0.92 | 1.40 | 2.37E-01 | G | 0.25 | G | 0.44 |
| rs2069810  | IL5        | 0.70 | 0.38 | 1.27 | 2.38E-01 | G | 0.29 | G | 0.01 |
| rs1799977  | MLH1       | 0.86 | 0.67 | 1.10 | 2.38E-01 | G | 0.05 | G | 0.30 |
| rs3212859  | CCND1      | 1.30 | 0.84 | 1.99 | 2.39E-01 | T | 0.21 | T | 0.03 |
| rs6018     | F5         | 1.29 | 0.85 | 1.96 | 2.39E-01 | G | 0.02 | G | 0.06 |
| rs1913474  | ESR1       | 0.85 | 0.65 | 1.11 | 2.39E-01 | T | 0.12 | T | 0.25 |
| rs12456560 | NDC80      | 1.20 | 0.88 | 1.64 | 2.40E-01 | T | 0.06 | T | 0.14 |
| rs10028494 | UGT2B7     | 1.24 | 0.87 | 1.76 | 2.40E-01 | C | 0.07 | C | 0.16 |
| rs6773295  | NR1I2      | 0.61 | 0.27 | 1.39 | 2.41E-01 | G | 0.14 | G | 0.02 |
| rs2300697  | SRD5A2     | 1.14 | 0.92 | 1.41 | 2.41E-01 | C | 0.29 | C | 0.42 |
| rs10017297 | Intergenic | 1.34 | 0.82 | 2.18 | 2.41E-01 | T | 0.25 | T | 0.01 |
| rs5743611  | TLR1       | 1.26 | 0.86 | 1.86 | 2.42E-01 | C | 0.01 | C | 0.10 |
| rs3757280  | HSP90AB1   | 0.78 | 0.52 | 1.18 | 2.42E-01 | C | 0.02 | C | 0.09 |
| rs2267237  | LARGE      | 0.82 | 0.58 | 1.15 | 2.42E-01 | C | 0.25 | C | 0.11 |
| rs3093057  | CSF1       | 1.15 | 0.91 | 1.46 | 2.42E-01 | T | 0.12 | T | 0.37 |
| rs1322055  | TNFSF8     | 0.82 | 0.58 | 1.15 | 2.43E-01 | C | 0.06 | C | 0.13 |
| rs472344   | ANKRD49    | 1.13 | 0.92 | 1.39 | 2.44E-01 | A | 0.38 | T | 0.46 |
| rs4150474  | ERCC3      | 0.87 | 0.69 | 1.10 | 2.44E-01 | G | 0.29 | G | 0.29 |
| rs10410075 | VRK3       | 1.41 | 0.79 | 2.51 | 2.44E-01 | A | 0.17 | A | 0.00 |
| rs9944225  | CYP19A1    | 0.77 | 0.50 | 1.19 | 2.44E-01 | A | 0.08 | A | 0.08 |
| rs7801671  | CYP3A4     | 1.45 | 0.77 | 2.73 | 2.44E-01 | A | 0.21 | A | 0.00 |
| rs186556   | SLC29A1    | 1.67 | 0.70 | 3.97 | 2.44E-01 | T | 0.07 | T | 0.00 |
| rs173537   | HERPUD1    | 1.14 | 0.91 | 1.42 | 2.44E-01 | T | 0.36 | C | 0.27 |
| rs1130864  | CRP        | 1.14 | 0.91 | 1.42 | 2.45E-01 | T | 0.20 | T | 0.30 |
| rs688755   | CYP4F12    | 0.87 | 0.68 | 1.10 | 2.45E-01 | C | 0.37 | C | 0.27 |

|            |              |      |      |      |          |   |      |   |      |
|------------|--------------|------|------|------|----------|---|------|---|------|
| rs4251545  | IRAK4        | 0.82 | 0.58 | 1.15 | 2.47E-01 | A | 0.30 | A | 0.10 |
| rs1677715  | PDSS1        | 1.15 | 0.91 | 1.44 | 2.47E-01 | G | 0.49 | A | 0.30 |
| rs4722266  | STK31        | 1.18 | 0.89 | 1.56 | 2.47E-01 | A | 0.19 | A | 0.15 |
| rs894817   | IGF2R        | 0.87 | 0.69 | 1.10 | 2.48E-01 | A | 0.27 | A | 0.35 |
| rs4792147  | ALOX15B      | 0.88 | 0.71 | 1.09 | 2.49E-01 | A | 0.17 | G | 0.50 |
| rs1334811  | TEK          | 1.32 | 0.82 | 2.11 | 2.49E-01 | A | 0.14 | A | 0.04 |
| rs12072582 | FMO3         | 0.43 | 0.10 | 1.80 | 2.49E-01 | C | 0.07 | C | 0.00 |
| rs3322     | LOC100129773 | 0.76 | 0.48 | 1.21 | 2.49E-01 | A | 0.01 | A | 0.08 |
| rs3093056  | CSF1         | 1.15 | 0.91 | 1.45 | 2.50E-01 | A | 0.18 | A | 0.37 |
| rs762551   | CYP1A2       | 0.87 | 0.69 | 1.10 | 2.50E-01 | C | 0.42 | C | 0.29 |
| rs2741872  | CYP3A7       | 1.20 | 0.88 | 1.62 | 2.51E-01 | A | 0.46 | A | 0.09 |
| rs1042034  | APOB         | 0.86 | 0.66 | 1.12 | 2.51E-01 | G | 0.14 | G | 0.25 |
| rs3138045  | NFKBIA       | 0.86 | 0.66 | 1.11 | 2.51E-01 | G | 0.26 | G | 0.21 |
| rs13141136 | HELQ         | 1.13 | 0.91 | 1.41 | 2.51E-01 | G | 0.11 | G | 0.44 |
| rs454078   | IL1RN        | 1.16 | 0.90 | 1.48 | 2.52E-01 | T | 0.07 | T | 0.29 |
| rs1270146  | MRE11A       | 1.13 | 0.92 | 1.38 | 2.52E-01 | T | 0.37 | C | 0.46 |
| rs3847262  | TPD52L3      | 0.77 | 0.49 | 1.21 | 2.53E-01 | T | 0.17 | T | 0.05 |
| rs839763   | CDC20        | 1.13 | 0.91 | 1.40 | 2.53E-01 | G | 0.28 | G | 0.38 |
| rs6577     | GSTA2        | 1.22 | 0.87 | 1.71 | 2.53E-01 | A | 0.39 | C | 0.06 |
| rs2070673  | CYP2E1       | 0.85 | 0.64 | 1.13 | 2.53E-01 | T | 0.36 | A | 0.18 |
| rs1514346  | IRF4         | 1.18 | 0.89 | 1.57 | 2.53E-01 | A | 0.40 | A | 0.14 |
| rs5082     | APOA2        | 0.88 | 0.72 | 1.09 | 2.54E-01 | C | 0.23 | C | 0.38 |
| rs1003483  | IGF2         | 0.88 | 0.71 | 1.10 | 2.54E-01 | G | 0.19 | G | 0.50 |
| rs4646227  | SLC15A1      | 0.72 | 0.42 | 1.26 | 2.55E-01 | C | 0.11 | C | 0.02 |
| rs978458   | IGF1         | 0.87 | 0.68 | 1.11 | 2.55E-01 | A | 0.37 | A | 0.26 |
| rs2290272  | SLC28A1      | 1.13 | 0.91 | 1.40 | 2.55E-01 | T | 0.25 | T | 0.38 |
| rs2072330  | ALDH3A1      | 1.13 | 0.91 | 1.40 | 2.55E-01 | A | 0.12 | A | 0.39 |
| rs2241342  | ABCB11       | 0.88 | 0.70 | 1.10 | 2.55E-01 | A | 0.38 | A | 0.36 |
| rs207927   | XRCC5        | 1.13 | 0.92 | 1.40 | 2.56E-01 | G | 0.25 | G | 0.44 |
| rs3731258  | CDK6         | 1.37 | 0.80 | 2.36 | 2.56E-01 | T | 0.14 | T | 0.01 |
| rs667515   | CCND1        | 0.87 | 0.69 | 1.10 | 2.57E-01 | C | 0.36 | C | 0.37 |
| rs871514   | UGT1A10      | 1.14 | 0.91 | 1.41 | 2.57E-01 | A | 0.27 | G | 0.44 |
| rs2686184  | FDFT1        | 0.88 | 0.70 | 1.10 | 2.57E-01 | A | 0.46 | A | 0.40 |
| rs2053098  | SLCO1B3      | 1.16 | 0.90 | 1.50 | 2.57E-01 | G | 0.42 | A | 0.14 |
| rs6768093  | ATR          | 0.88 | 0.71 | 1.10 | 2.58E-01 | A | 0.16 | A | 0.44 |
| rs32950    | MSH3         | 1.13 | 0.91 | 1.41 | 2.59E-01 | A | 0.50 | G | 0.44 |
| rs6756629  | ABCG5        | 1.25 | 0.85 | 1.82 | 2.59E-01 | A | 0.06 | A | 0.06 |
| rs138056   | SULT4A1      | 1.16 | 0.90 | 1.49 | 2.59E-01 | A | 0.31 | A | 0.20 |
| rs1060250  | SLC7A5       | 1.66 | 0.69 | 4.00 | 2.60E-01 | G | 0.06 | O | 0.00 |
| rs1934963  | CYP2C9       | 0.85 | 0.64 | 1.13 | 2.60E-01 | C | 0.21 | C | 0.17 |
| rs4148946  | CHST3        | 0.88 | 0.71 | 1.10 | 2.60E-01 | C | 0.21 | C | 0.42 |
| rs3743261  | IGF1R        | 1.38 | 0.79 | 2.40 | 2.60E-01 | T | 0.07 | T | 0.03 |
| rs2229362  | BCL6         | 1.17 | 0.89 | 1.54 | 2.61E-01 | A | 0.37 | A | 0.15 |
| rs1051266  | SLC19A1      | 0.88 | 0.70 | 1.10 | 2.61E-01 | G | 0.37 | A | 0.43 |
| rs1934951  | CYP2C8       | 1.16 | 0.90 | 1.50 | 2.62E-01 | A | 0.34 | A | 0.17 |
| rs2808630  | CRP          | 1.14 | 0.91 | 1.44 | 2.62E-01 | C | 0.18 | C | 0.28 |
| rs1137115  | CYP2A6       | 1.14 | 0.91 | 1.44 | 2.62E-01 | A | 0.21 | A | 0.26 |
| rs10896380 | IGHMBP2      | 0.85 | 0.64 | 1.13 | 2.63E-01 | G | 0.10 | G | 0.23 |
| rs6028     | F5           | 1.15 | 0.90 | 1.45 | 2.63E-01 | C | 0.05 | C | 0.30 |
| rs1054875  | POLG         | 0.88 | 0.70 | 1.10 | 2.63E-01 | A | 0.41 | T | 0.40 |

|            |              |      |      |      |          |   |      |   |      |
|------------|--------------|------|------|------|----------|---|------|---|------|
| rs947894   | GSTP1        | 1.13 | 0.91 | 1.41 | 2.64E-01 | G | 0.44 | G | 0.35 |
| rs2070672  | CYP2E1       | 1.30 | 0.82 | 2.05 | 2.64E-01 | G | 0.14 | G | 0.03 |
| rs4072037  | MUC1         | 0.89 | 0.72 | 1.10 | 2.65E-01 | G | 0.36 | G | 0.43 |
| rs207928   | XRCC5        | 1.13 | 0.91 | 1.39 | 2.65E-01 | A | 0.25 | A | 0.44 |
| rs212090   | ABCC1        | 1.14 | 0.90 | 1.44 | 2.65E-01 | A | 0.20 | A | 0.44 |
| rs163078   | FAM82A       | 1.13 | 0.91 | 1.40 | 2.66E-01 | T | 0.30 | T | 0.38 |
| rs3087455  | CASP3        | 1.13 | 0.91 | 1.42 | 2.66E-01 | C | 0.22 | C | 0.37 |
| rs2508784  | MRE11A       | 1.12 | 0.91 | 1.38 | 2.66E-01 | A | 0.36 | G | 0.46 |
| rs2687081  | CYP3A7       | 1.19 | 0.88 | 1.60 | 2.66E-01 | T | 0.45 | C | 0.10 |
| rs7778377  | STARD3NL     | 0.86 | 0.65 | 1.13 | 2.66E-01 | T | 0.10 | T | 0.19 |
| rs2071426  | CYP2C8       | 0.87 | 0.68 | 1.11 | 2.66E-01 | G | 0.24 | G | 0.28 |
| rs2275801  | ZMYND8       | 0.81 | 0.56 | 1.18 | 2.67E-01 | A | 0.45 | G | 0.07 |
| rs7895372  | ITGA8        | 1.42 | 0.76 | 2.64 | 2.67E-01 | G | 0.10 | G | 0.00 |
| rs6410     | CYP11B1      | 0.88 | 0.70 | 1.10 | 2.68E-01 | G | 0.41 | A | 0.46 |
| rs3917974  | CSF3R        | 0.45 | 0.11 | 1.86 | 2.68E-01 | G | 0.07 | G | 0.00 |
| rs759845   | ADAM23       | 1.13 | 0.91 | 1.42 | 2.68E-01 | C | 0.33 | C | 0.40 |
| rs4647001  | JUN          | 0.88 | 0.71 | 1.10 | 2.68E-01 | C | 0.35 | G | 0.35 |
| rs2069843  | IL6          | 1.35 | 0.79 | 2.29 | 2.69E-01 | A | 0.12 | A | 0.02 |
| rs1770810  | SLC2A1       | 0.85 | 0.63 | 1.14 | 2.70E-01 | T | 0.16 | T | 0.19 |
| rs13166360 | ADCY2        | 0.85 | 0.63 | 1.14 | 2.71E-01 | T | 0.08 | T | 0.20 |
| rs5898     | F2           | 0.78 | 0.51 | 1.21 | 2.71E-01 | A | 0.04 | A | 0.08 |
| rs2304821  | PTPRB        | 0.80 | 0.53 | 1.19 | 2.72E-01 | A | 0.10 | A | 0.10 |
| rs497763   | ANKRD49      | 1.13 | 0.91 | 1.39 | 2.72E-01 | A | 0.37 | A | 0.45 |
| rs5744934  | POLE         | 1.18 | 0.88 | 1.59 | 2.72E-01 | G | 0.15 | G | 0.11 |
| rs2075724  | CSF2RB       | 1.13 | 0.91 | 1.40 | 2.72E-01 | T | 0.14 | G | 0.44 |
| rs241440   | TAP2         | 0.87 | 0.68 | 1.12 | 2.72E-01 | A | 0.13 | A | 0.23 |
| rs7805658  | SHFM1        | 0.88 | 0.70 | 1.10 | 2.73E-01 | A | 0.12 | A | 0.44 |
| rs3733890  | BHMT         | 0.88 | 0.69 | 1.11 | 2.73E-01 | A | 0.23 | A | 0.32 |
| rs3743258  | IGF1R        | 1.14 | 0.90 | 1.44 | 2.73E-01 | A | 0.32 | A | 0.31 |
| rs35605    | ABCC1        | 1.17 | 0.88 | 1.55 | 2.73E-01 | T | 0.07 | T | 0.19 |
| rs3755160  | ABCB11       | 1.13 | 0.91 | 1.41 | 2.74E-01 | T | 0.17 | T | 0.38 |
| rs934197   | APOB         | 1.14 | 0.90 | 1.43 | 2.74E-01 | A | 0.16 | A | 0.32 |
| rs557462   | ABCB11       | 0.88 | 0.69 | 1.11 | 2.74E-01 | G | 0.05 | G | 0.31 |
| rs2687079  | CYP3A7       | 1.18 | 0.88 | 1.60 | 2.75E-01 | T | 0.45 | A | 0.10 |
| rs2687084  | CYP3A7       | 1.18 | 0.88 | 1.60 | 2.75E-01 | T | 0.45 | G | 0.10 |
| rs2299264  | PON2         | 1.15 | 0.90 | 1.46 | 2.75E-01 | T | 0.23 | T | 0.24 |
| rs3829963  | LOC100131484 | 1.17 | 0.88 | 1.55 | 2.75E-01 | A | 0.31 | A | 0.15 |
| rs329003   | PPP4R1       | 0.81 | 0.55 | 1.19 | 2.75E-01 | G | 0.00 | G | 0.11 |
| rs2687078  | CYP3A7       | 1.18 | 0.87 | 1.60 | 2.76E-01 | A | 0.45 | G | 0.10 |
| rs5370     | EDN1         | 1.15 | 0.89 | 1.48 | 2.76E-01 | T | 0.21 | T | 0.23 |
| rs1851425  | CYP3A7       | 1.18 | 0.87 | 1.60 | 2.77E-01 | T | 0.45 | C | 0.10 |
| rs1346044  | WRN          | 1.14 | 0.90 | 1.46 | 2.77E-01 | C | 0.14 | C | 0.26 |
| rs2297404  | ABCA1        | 0.76 | 0.46 | 1.25 | 2.77E-01 | C | 0.05 | C | 0.08 |
| rs2740565  | CYP3A7       | 1.18 | 0.87 | 1.60 | 2.78E-01 | T | 0.45 | A | 0.10 |
| rs1024611  | CCL2         | 1.13 | 0.91 | 1.41 | 2.78E-01 | C | 0.19 | C | 0.30 |
| rs2479717  | CCND3        | 0.87 | 0.67 | 1.12 | 2.78E-01 | T | 0.03 | T | 0.27 |
| rs3138047  | NFKBIA       | 0.87 | 0.67 | 1.12 | 2.79E-01 | T | 0.26 | T | 0.21 |
| rs17151919 | LEP          | 0.51 | 0.15 | 1.74 | 2.79E-01 | A | 0.07 | A | 0.00 |
| rs2296241  | CYP24A1      | 1.12 | 0.91 | 1.38 | 2.79E-01 | G | 0.47 | G | 0.48 |
| rs755622   | MIF          | 1.15 | 0.90 | 1.46 | 2.79E-01 | G | 0.41 | G | 0.19 |

|            |              |      |      |      |          |   |      |   |      |
|------------|--------------|------|------|------|----------|---|------|---|------|
| rs3113224  | HNMT         | 0.87 | 0.68 | 1.12 | 2.80E-01 | A | 0.49 | A | 0.20 |
| rs730722   | CHST3        | 1.21 | 0.86 | 1.70 | 2.80E-01 | G | 0.29 | G | 0.05 |
| rs2234700  | EPHX1        | 0.45 | 0.11 | 1.92 | 2.80E-01 | C | 0.07 | C | 0.00 |
| rs2299266  | PON2         | 1.14 | 0.90 | 1.46 | 2.80E-01 | G | 0.23 | G | 0.24 |
| rs4839469  | VANGL1       | 1.17 | 0.88 | 1.56 | 2.81E-01 | A | 0.07 | A | 0.14 |
| rs776742   | CYP3A7       | 1.18 | 0.87 | 1.60 | 2.81E-01 | G | 0.45 | A | 0.10 |
| rs3783408  | MAP4K5       | 0.87 | 0.67 | 1.13 | 2.81E-01 | A | 0.08 | A | 0.26 |
| rs8192707  | PLCG1        | 1.17 | 0.88 | 1.56 | 2.82E-01 | G | 0.11 | G | 0.14 |
| rs820196   | LOC100132011 | 0.86 | 0.64 | 1.14 | 2.82E-01 | C | 0.25 | C | 0.22 |
| rs28948385 | UGT1A8       | 0.68 | 0.33 | 1.38 | 2.83E-01 | G | 0.15 | G | 0.03 |
| rs2267665  | PPARD        | 0.85 | 0.64 | 1.14 | 2.83E-01 | A | 0.11 | A | 0.17 |
| rs628959   | DPYD         | 0.87 | 0.68 | 1.12 | 2.84E-01 | G | 0.11 | G | 0.27 |
| rs854544   | PPP1R9A      | 0.88 | 0.70 | 1.11 | 2.84E-01 | C | 0.24 | T | 0.35 |
| rs1367117  | APOB         | 1.13 | 0.90 | 1.43 | 2.84E-01 | A | 0.15 | A | 0.32 |
| rs1492078  | AGTR1        | 0.88 | 0.70 | 1.11 | 2.84E-01 | G | 0.15 | A | 0.36 |
| rs1609519  | DPYD         | 0.87 | 0.68 | 1.12 | 2.84E-01 | G | 0.07 | G | 0.27 |
| rs2068604  | PON2         | 1.14 | 0.89 | 1.46 | 2.84E-01 | T | 0.25 | T | 0.24 |
| rs4554144  | UGT2B7       | 1.13 | 0.91 | 1.40 | 2.85E-01 | C | 0.24 | T | 0.49 |
| rs2255235  | B2M          | 1.18 | 0.87 | 1.60 | 2.85E-01 | T | 0.36 | T | 0.12 |
| rs1805331  | RAD23B       | 1.25 | 0.83 | 1.87 | 2.85E-01 | A | 0.05 | A | 0.07 |
| rs10499926 | SHFM1        | 0.88 | 0.71 | 1.11 | 2.86E-01 | C | 0.12 | C | 0.44 |
| rs348472   | ALDH1A1      | 0.81 | 0.55 | 1.20 | 2.86E-01 | A | 0.36 | A | 0.04 |
| rs6661174  | FMO2         | 0.61 | 0.24 | 1.52 | 2.87E-01 | C | 0.15 | C | 0.00 |
| rs6671692  | FMO2         | 0.61 | 0.24 | 1.53 | 2.88E-01 | A | 0.15 | A | 0.00 |
| rs35604    | ABCC1        | 1.16 | 0.88 | 1.54 | 2.88E-01 | G | 0.07 | G | 0.19 |
| rs1800896  | IL10         | 0.89 | 0.71 | 1.11 | 2.88E-01 | G | 0.36 | G | 0.45 |
| rs7536646  | FMO2         | 0.61 | 0.24 | 1.53 | 2.89E-01 | A | 0.15 | A | 0.00 |
| rs6941583  | POLH         | 0.79 | 0.51 | 1.22 | 2.89E-01 | T | 0.30 | T | 0.03 |
| rs731236   | VDR          | 0.89 | 0.71 | 1.11 | 2.89E-01 | C | 0.27 | C | 0.38 |
| rs737865   | COMT         | 0.88 | 0.69 | 1.12 | 2.89E-01 | C | 0.15 | C | 0.28 |
| rs1128503  | ABCB1        | 0.88 | 0.71 | 1.11 | 2.90E-01 | T | 0.20 | T | 0.43 |
| rs2287498  | TP53         | 1.19 | 0.86 | 1.65 | 2.90E-01 | A | 0.25 | A | 0.09 |
| rs3783613  | VCAM1        | 0.53 | 0.16 | 1.72 | 2.90E-01 | C | 0.10 | C | 0.00 |
| rs1029871  | NEK4         | 1.13 | 0.90 | 1.41 | 2.91E-01 | G | 0.16 | G | 0.42 |
| rs2300095  | FRAP1        | 1.13 | 0.90 | 1.43 | 2.92E-01 | C | 0.45 | T | 0.27 |
| rs474320   | PGR          | 0.84 | 0.60 | 1.16 | 2.92E-01 | A | 0.03 | A | 0.15 |
| rs963065   | PPP3CA       | 0.89 | 0.71 | 1.11 | 2.93E-01 | G | 0.16 | A | 0.44 |
| rs5277     | PTGS2        | 0.85 | 0.63 | 1.15 | 2.93E-01 | C | 0.02 | C | 0.14 |
| rs2239393  | COMT         | 0.89 | 0.71 | 1.11 | 2.93E-01 | G | 0.42 | G | 0.36 |
| rs1799929  | NAT2         | 0.89 | 0.72 | 1.10 | 2.93E-01 | T | 0.21 | T | 0.42 |
| rs2480452  | PPP2R4       | 0.78 | 0.50 | 1.24 | 2.93E-01 | A | 0.01 | A | 0.07 |
| rs2216504  | ABCB11       | 1.27 | 0.81 | 1.99 | 2.94E-01 | A | 0.12 | A | 0.04 |
| rs1801282  | PPARG        | 1.19 | 0.86 | 1.65 | 2.95E-01 | G | 0.02 | G | 0.12 |
| rs1800925  | IL13         | 1.14 | 0.89 | 1.45 | 2.96E-01 | T | 0.40 | T | 0.20 |
| rs8940     | CAV2         | 0.86 | 0.65 | 1.14 | 2.96E-01 | G | 0.21 | G | 0.16 |
| rs288326   | FRZB         | 0.81 | 0.55 | 1.20 | 2.96E-01 | A | 0.03 | A | 0.11 |
| rs2142694  | CYP2D6       | 1.12 | 0.90 | 1.40 | 2.96E-01 | A | 0.37 | A | 0.48 |
| rs2165627  | PTPRB        | 0.84 | 0.61 | 1.16 | 2.97E-01 | G | 0.13 | G | 0.14 |
| rs2296239  | CYP24A1      | 1.13 | 0.90 | 1.43 | 2.97E-01 | T | 0.47 | T | 0.23 |
| rs993891   | HNMT         | 0.87 | 0.68 | 1.13 | 2.97E-01 | C | 0.38 | A | 0.20 |

|            |          |      |      |      |          |   |      |   |      |
|------------|----------|------|------|------|----------|---|------|---|------|
| rs3795498  | STK40    | 1.15 | 0.88 | 1.49 | 2.98E-01 | A | 0.19 | A | 0.23 |
| rs2762934  | CYP24A1  | 1.15 | 0.88 | 1.51 | 2.98E-01 | A | 0.15 | A | 0.17 |
| rs811925   | PRDM1    | 1.16 | 0.88 | 1.53 | 2.98E-01 | C | 0.16 | C | 0.16 |
| rs7586110  | UGT1A10  | 1.12 | 0.90 | 1.40 | 2.99E-01 | G | 0.23 | G | 0.37 |
| rs1409986  | PTGER3   | 0.76 | 0.46 | 1.27 | 2.99E-01 | T | 0.02 | T | 0.07 |
| rs1800629  | TNF      | 0.85 | 0.63 | 1.15 | 2.99E-01 | A | 0.10 | A | 0.18 |
| rs7311358  | SLCO1B3  | 1.15 | 0.88 | 1.49 | 3.00E-01 | A | 0.42 | G | 0.14 |
| rs828063   | DPYD     | 0.86 | 0.65 | 1.14 | 3.00E-01 | A | 0.18 | A | 0.17 |
| rs472614   | ABCB11   | 0.90 | 0.73 | 1.10 | 3.01E-01 | A | 0.42 | A | 0.45 |
| rs3817405  | PLXDC2   | 0.89 | 0.72 | 1.11 | 3.01E-01 | C | 0.34 | C | 0.37 |
| rs2238335  | BLM      | 1.27 | 0.81 | 1.99 | 3.01E-01 | C | 0.18 | C | 0.02 |
| rs737693   | MMP12    | 0.83 | 0.59 | 1.18 | 3.02E-01 | T | 0.02 | T | 0.14 |
| rs875740   | ABCC1    | 1.12 | 0.90 | 1.39 | 3.03E-01 | G | 0.45 | G | 0.36 |
| rs11547883 | VRK3     | 1.36 | 0.75 | 2.46 | 3.04E-01 | G | 0.17 | G | 0.00 |
| rs512535   | APOB     | 0.89 | 0.71 | 1.11 | 3.04E-01 | G | 0.23 | A | 0.46 |
| rs2286232  | PON2     | 1.14 | 0.89 | 1.45 | 3.05E-01 | T | 0.24 | T | 0.24 |
| rs2299263  | PON2     | 1.14 | 0.89 | 1.45 | 3.05E-01 | T | 0.24 | T | 0.24 |
| rs4987164  | DMC1     | 1.31 | 0.78 | 2.19 | 3.05E-01 | C | 0.12 | C | 0.02 |
| rs9666607  | CD44     | 0.88 | 0.69 | 1.12 | 3.06E-01 | A | 0.14 | A | 0.30 |
| rs697221   | DDIT3    | 0.87 | 0.66 | 1.14 | 3.06E-01 | A | 0.23 | A | 0.16 |
| rs10836230 | CAT      | 0.88 | 0.69 | 1.12 | 3.07E-01 | T | 0.17 | T | 0.35 |
| rs994174   | NRG3     | 0.89 | 0.71 | 1.11 | 3.08E-01 | A | 0.27 | G | 0.32 |
| rs2069783  | IL3      | 1.41 | 0.73 | 2.74 | 3.08E-01 | C | 0.18 | C | 0.00 |
| rs854555   | PON1     | 0.89 | 0.72 | 1.11 | 3.08E-01 | C | 0.34 | A | 0.38 |
| rs3786187  | NFATC1   | 0.90 | 0.73 | 1.11 | 3.08E-01 | G | 0.46 | C | 0.42 |
| rs8187799  | ABCB4    | 0.83 | 0.58 | 1.19 | 3.09E-01 | G | 0.33 | G | 0.08 |
| rs1709082  | CYP2A13  | 1.18 | 0.86 | 1.62 | 3.09E-01 | G | 0.37 | G | 0.10 |
| rs1020678  | HNMT     | 0.90 | 0.73 | 1.10 | 3.10E-01 | G | 0.44 | G | 0.39 |
| rs11572073 | CYP2C8   | 1.53 | 0.67 | 3.50 | 3.10E-01 | T | 0.12 | T | 0.00 |
| rs2234997  | ATM      | 0.66 | 0.30 | 1.46 | 3.10E-01 | A | 0.19 | A | 0.00 |
| rs2238783  | ARVCF    | 1.12 | 0.90 | 1.38 | 3.10E-01 | C | 0.45 | G | 0.36 |
| rs1780196  | PDSS1    | 1.16 | 0.87 | 1.55 | 3.10E-01 | A | 0.10 | A | 0.15 |
| rs3778893  | STARD3NL | 0.87 | 0.67 | 1.13 | 3.10E-01 | A | 0.22 | A | 0.22 |
| rs1023244  | DPYD     | 1.22 | 0.83 | 1.81 | 3.10E-01 | G | 0.02 | G | 0.07 |
| rs5742980  | PMS1     | 0.35 | 0.05 | 2.63 | 3.10E-01 | C | 0.07 | 0 | 0.00 |
| rs4987310  | SELL     | 1.15 | 0.88 | 1.50 | 3.10E-01 | T | 0.26 | T | 0.16 |
| rs2011404  | UGT1A10  | 1.17 | 0.86 | 1.58 | 3.10E-01 | T | 0.05 | T | 0.14 |
| rs593421   | CYP4F12  | 0.88 | 0.69 | 1.13 | 3.11E-01 | C | 0.35 | C | 0.27 |
| rs1296028  | FDFT1    | 0.87 | 0.67 | 1.13 | 3.11E-01 | G | 0.12 | G | 0.26 |
| rs3087461  | WT1      | 0.81 | 0.54 | 1.22 | 3.11E-01 | T | 0.10 | T | 0.09 |
| rs3218273  | IL2RB    | 1.66 | 0.62 | 4.42 | 3.12E-01 | T | 0.07 | 0 | 0.00 |
| rs608343   | LRP5     | 1.12 | 0.90 | 1.38 | 3.12E-01 | A | 0.40 | G | 0.32 |
| rs499009   | DPYD     | 0.88 | 0.69 | 1.13 | 3.13E-01 | A | 0.08 | A | 0.27 |
| rs3118529  | RXRA     | 0.86 | 0.64 | 1.15 | 3.13E-01 | T | 0.21 | C | 0.32 |
| rs3088142  | DUSP13   | 1.12 | 0.90 | 1.38 | 3.13E-01 | C | 0.29 | T | 0.44 |
| rs4766002  | C12orf32 | 1.12 | 0.90 | 1.40 | 3.14E-01 | G | 0.30 | T | 0.38 |
| rs10429965 | NEK2     | 1.15 | 0.87 | 1.52 | 3.14E-01 | C | 0.13 | C | 0.14 |
| rs2305948  | KDR      | 1.18 | 0.86 | 1.62 | 3.15E-01 | T | 0.28 | T | 0.10 |
| rs5742666  | IGF1     | 0.88 | 0.68 | 1.13 | 3.15E-01 | G | 0.23 | G | 0.23 |
| rs8191754  | IGF2R    | 0.85 | 0.61 | 1.17 | 3.15E-01 | G | 0.15 | G | 0.14 |

|            |              |      |      |      |          |   |      |   |      |
|------------|--------------|------|------|------|----------|---|------|---|------|
| rs1059293  | IFNGR2       | 0.90 | 0.73 | 1.11 | 3.15E-01 | C | 0.24 | T | 0.49 |
| rs4656994  | NDUFS2       | 1.14 | 0.89 | 1.46 | 3.15E-01 | A | 0.19 | A | 0.22 |
| rs3776432  | NSUN2        | 1.12 | 0.90 | 1.38 | 3.16E-01 | A | 0.28 | A | 0.33 |
| rs1800169  | CNTF         | 0.84 | 0.59 | 1.19 | 3.17E-01 | A | 0.05 | A | 0.14 |
| rs207943   | XRCC5        | 0.90 | 0.73 | 1.11 | 3.17E-01 | C | 0.49 | G | 0.45 |
| rs3793524  | PTPN3        | 1.12 | 0.90 | 1.39 | 3.17E-01 | C | 0.48 | C | 0.36 |
| rs540742   | GIPC2        | 1.13 | 0.89 | 1.45 | 3.18E-01 | C | 0.21 | C | 0.23 |
| rs9894946  | TP53         | 0.85 | 0.61 | 1.17 | 3.18E-01 | A | 0.03 | A | 0.17 |
| rs1131532  | TNFSF10      | 0.89 | 0.70 | 1.12 | 3.19E-01 | T | 0.24 | T | 0.37 |
| rs1455158  | HNMT         | 0.88 | 0.68 | 1.13 | 3.19E-01 | G | 0.49 | A | 0.20 |
| rs3829888  | ABCB11       | 1.27 | 0.80 | 2.01 | 3.19E-01 | C | 0.13 | C | 0.04 |
| rs6271     | DBH          | 1.24 | 0.81 | 1.91 | 3.20E-01 | T | 0.03 | T | 0.06 |
| rs4926     | SERPING1     | 1.14 | 0.88 | 1.46 | 3.20E-01 | A | 0.11 | A | 0.26 |
| rs144848   | BRCA2        | 1.12 | 0.89 | 1.42 | 3.20E-01 | G | 0.12 | G | 0.28 |
| rs1129923  | DUSP23       | 0.80 | 0.52 | 1.24 | 3.20E-01 | A | 0.02 | A | 0.09 |
| rs2472299  | CYP1A1       | 0.89 | 0.71 | 1.12 | 3.20E-01 | A | 0.40 | A | 0.29 |
| rs348459   | ALDH1A1      | 0.78 | 0.48 | 1.27 | 3.20E-01 | G | 0.18 | G | 0.04 |
| rs1801279  | NAT2         | 1.62 | 0.63 | 4.16 | 3.20E-01 | A | 0.06 | A | 0.00 |
| rs3886641  | GARS         | 0.50 | 0.13 | 1.97 | 3.20E-01 | A | 0.05 | A | 0.00 |
| rs2380165  | BLM          | 0.89 | 0.71 | 1.12 | 3.22E-01 | A | 0.43 | G | 0.29 |
| rs207878   | XRCC5        | 0.90 | 0.73 | 1.11 | 3.23E-01 | G | 0.13 | G | 0.48 |
| rs2270423  | GSTZ1        | 0.89 | 0.71 | 1.12 | 3.23E-01 | A | 0.28 | A | 0.30 |
| rs1799782  | XRCC1        | 0.81 | 0.54 | 1.23 | 3.24E-01 | T | 0.07 | T | 0.09 |
| rs10018625 | TLR3         | 0.88 | 0.69 | 1.13 | 3.24E-01 | T | 0.38 | T | 0.23 |
| rs2306168  | SLCO2B1      | 1.27 | 0.79 | 2.04 | 3.24E-01 | T | 0.29 | T | 0.03 |
| rs7665103  | HELQ         | 1.11 | 0.90 | 1.38 | 3.25E-01 | G | 0.45 | G | 0.44 |
| rs4149117  | SLCO1B3      | 1.14 | 0.88 | 1.48 | 3.26E-01 | G | 0.42 | T | 0.14 |
| rs26312    | GHRL         | 0.85 | 0.62 | 1.18 | 3.27E-01 | A | 0.23 | A | 0.13 |
| rs3731680  | SULT1C2      | 0.77 | 0.45 | 1.30 | 3.27E-01 | C | 0.02 | C | 0.07 |
| rs2227552  | C10orf55     | 0.88 | 0.69 | 1.13 | 3.27E-01 | C | 0.21 | C | 0.30 |
| rs1537514  | C1orf167     | 0.83 | 0.58 | 1.20 | 3.27E-01 | G | 0.09 | G | 0.11 |
| rs971074   | ADH7         | 0.85 | 0.60 | 1.18 | 3.28E-01 | A | 0.16 | A | 0.11 |
| rs1801132  | ESR1         | 0.88 | 0.67 | 1.14 | 3.28E-01 | G | 0.10 | G | 0.24 |
| rs8832     | IL4R         | 0.90 | 0.72 | 1.11 | 3.29E-01 | G | 0.25 | A | 0.46 |
| rs1129055  | CD86         | 1.13 | 0.89 | 1.44 | 3.29E-01 | A | 0.21 | A | 0.26 |
| rs10017301 | ZNF827       | 0.81 | 0.52 | 1.24 | 3.30E-01 | T | 0.29 | T | 0.04 |
| rs1929860  | CDC42BPA     | 1.12 | 0.89 | 1.41 | 3.30E-01 | A | 0.25 | A | 0.34 |
| rs2251660  | RDM1         | 0.87 | 0.65 | 1.15 | 3.30E-01 | G | 0.40 | G | 0.14 |
| rs7512785  | FMO2         | 0.89 | 0.71 | 1.12 | 3.30E-01 | T | 0.34 | T | 0.29 |
| rs6330     | NGF          | 0.89 | 0.71 | 1.12 | 3.30E-01 | T | 0.18 | T | 0.44 |
| rs8187706  | ABCC2        | 0.57 | 0.19 | 1.76 | 3.31E-01 | A | 0.12 | O | 0.00 |
| rs1455162  | HNMT         | 0.88 | 0.69 | 1.14 | 3.31E-01 | C | 0.49 | C | 0.20 |
| rs2274756  | LOC100128028 | 0.86 | 0.64 | 1.16 | 3.31E-01 | A | 0.17 | A | 0.16 |
| rs448012   | FLT4         | 0.89 | 0.71 | 1.12 | 3.31E-01 | G | 0.48 | G | 0.37 |
| rs1014666  | MRE11A       | 1.11 | 0.90 | 1.36 | 3.31E-01 | C | 0.50 | C | 0.46 |
| rs6457813  | PPARD        | 0.79 | 0.48 | 1.28 | 3.31E-01 | T | 0.21 | T | 0.03 |
| rs423904   | IL1RN        | 1.13 | 0.88 | 1.44 | 3.32E-01 | T | 0.08 | T | 0.30 |
| rs508078   | GSTA4        | 1.20 | 0.83 | 1.75 | 3.32E-01 | A | 0.07 | A | 0.09 |
| rs405509   | APOE         | 1.11 | 0.90 | 1.38 | 3.32E-01 | A | 0.27 | A | 0.48 |
| rs2229532  | ACP5         | 1.46 | 0.68 | 3.15 | 3.33E-01 | A | 0.11 | A | 0.00 |

|            |           |      |      |      |          |   |      |   |      |
|------------|-----------|------|------|------|----------|---|------|---|------|
| rs12360    | CYP3A7    | 1.16 | 0.86 | 1.58 | 3.33E-01 | T | 0.45 | C | 0.10 |
| rs1133818  | MYCBPAP   | 0.88 | 0.69 | 1.13 | 3.33E-01 | C | 0.16 | C | 0.28 |
| rs1509618  | LOC728442 | 0.89 | 0.71 | 1.12 | 3.34E-01 | T | 0.34 | C | 0.39 |
| rs16845759 | TNFSF10   | 1.57 | 0.63 | 3.94 | 3.34E-01 | T | 0.07 | T | 0.00 |
| rs915927   | XRCC1     | 1.11 | 0.90 | 1.36 | 3.35E-01 | G | 0.42 | G | 0.43 |
| rs1358312  | PPP3CA    | 0.87 | 0.65 | 1.16 | 3.35E-01 | A | 0.18 | A | 0.18 |
| rs20541    | IL13      | 1.13 | 0.88 | 1.44 | 3.36E-01 | T | 0.17 | T | 0.21 |
| rs1566734  | PTPRJ     | 0.85 | 0.62 | 1.18 | 3.36E-01 | G | 0.13 | G | 0.15 |
| rs12233949 | GHR       | 0.89 | 0.69 | 1.13 | 3.37E-01 | C | 0.05 | C | 0.29 |
| rs1800468  | B9D2      | 0.81 | 0.53 | 1.25 | 3.37E-01 | A | 0.04 | A | 0.08 |
| rs4646312  | COMT      | 0.89 | 0.71 | 1.12 | 3.37E-01 | C | 0.17 | C | 0.36 |
| rs6095558  | PTGIS     | 0.88 | 0.68 | 1.14 | 3.38E-01 | T | 0.13 | T | 0.25 |
| rs3024944  | STAT6     | 1.52 | 0.65 | 3.56 | 3.38E-01 | C | 0.08 | C | 0.00 |
| rs1800788  | FGB       | 0.87 | 0.67 | 1.15 | 3.38E-01 | T | 0.10 | T | 0.21 |
| rs529126   | MRE11A    | 1.12 | 0.89 | 1.40 | 3.39E-01 | A | 0.30 | A | 0.27 |
| rs853785   | ABCB11    | 0.90 | 0.73 | 1.11 | 3.39E-01 | A | 0.37 | G | 0.44 |
| rs875444   | RXRA      | 1.12 | 0.89 | 1.39 | 3.39E-01 | A | 0.15 | G | 0.39 |
| rs2109505  | ABCB4     | 1.14 | 0.87 | 1.49 | 3.39E-01 | A | 0.33 | A | 0.17 |
| rs3092906  | ATM       | 0.68 | 0.31 | 1.50 | 3.39E-01 | G | 0.18 | G | 0.00 |
| rs2124459  | CBS       | 1.11 | 0.90 | 1.38 | 3.40E-01 | C | 0.40 | C | 0.39 |
| rs2227956  | HSPA1L    | 0.86 | 0.62 | 1.18 | 3.40E-01 | C | 0.02 | C | 0.16 |
| rs9482     | ATF6      | 1.12 | 0.89 | 1.40 | 3.41E-01 | G | 0.49 | A | 0.28 |
| rs1344642  | STK36     | 0.90 | 0.73 | 1.11 | 3.41E-01 | G | 0.37 | A | 0.42 |
| rs7689099  | NEIL3     | 1.16 | 0.85 | 1.59 | 3.41E-01 | G | 0.08 | G | 0.11 |
| rs6759892  | UGT1A10   | 1.11 | 0.90 | 1.38 | 3.42E-01 | G | 0.35 | G | 0.40 |
| rs2687117  | CYP3A4    | 0.74 | 0.40 | 1.37 | 3.42E-01 | T | 0.32 | T | 0.00 |
| rs689462   | PTGS2     | 0.80 | 0.50 | 1.27 | 3.43E-01 | C | 0.25 | C | 0.03 |
| rs2295298  | NFATC4    | 1.11 | 0.89 | 1.38 | 3.44E-01 | G | 0.15 | A | 0.42 |
| rs1052536  | LIG3      | 1.11 | 0.89 | 1.38 | 3.44E-01 | T | 0.18 | T | 0.45 |
| rs2193587  | DGKG      | 1.13 | 0.88 | 1.46 | 3.44E-01 | G | 0.09 | G | 0.23 |
| rs1380657  | MYCBPAP   | 0.89 | 0.69 | 1.14 | 3.44E-01 | G | 0.16 | G | 0.28 |
| rs11818239 | BMPR1A    | 1.47 | 0.66 | 3.25 | 3.44E-01 | A | 0.12 | A | 0.00 |
| rs827500   | DPYD      | 0.89 | 0.69 | 1.14 | 3.44E-01 | T | 0.08 | T | 0.27 |
| rs10211    | CYP3A7    | 1.16 | 0.85 | 1.57 | 3.44E-01 | A | 0.45 | G | 0.10 |
| rs1136410  | PARP1     | 1.14 | 0.87 | 1.51 | 3.44E-01 | C | 0.06 | C | 0.19 |
| rs4646487  | CYP4B1    | 0.86 | 0.62 | 1.18 | 3.45E-01 | T | 0.19 | T | 0.13 |
| rs9576175  | CSNK1A1L  | 0.90 | 0.73 | 1.12 | 3.45E-01 | G | 0.47 | T | 0.49 |
| rs419833   | GSTA4     | 0.90 | 0.73 | 1.12 | 3.46E-01 | C | 0.42 | G | 0.49 |
| rs212087   | ABCC1     | 1.12 | 0.89 | 1.41 | 3.47E-01 | T | 0.20 | T | 0.43 |
| rs7136446  | IGF1      | 1.11 | 0.89 | 1.38 | 3.47E-01 | C | 0.26 | C | 0.38 |
| rs2489581  | PDSS1     | 1.11 | 0.89 | 1.38 | 3.47E-01 | C | 0.34 | G | 0.40 |
| rs6102     | SERPINB2  | 1.13 | 0.87 | 1.46 | 3.48E-01 | G | 0.21 | G | 0.21 |
| rs1059751  | ABCC4     | 0.90 | 0.73 | 1.12 | 3.48E-01 | C | 0.30 | C | 0.46 |
| rs3828942  | LEP       | 0.90 | 0.72 | 1.12 | 3.49E-01 | A | 0.19 | A | 0.45 |
| rs1062372  | JTV1      | 0.88 | 0.68 | 1.15 | 3.49E-01 | A | 0.32 | A | 0.22 |
| rs12922317 | RUNDC2A   | 1.11 | 0.89 | 1.37 | 3.49E-01 | G | 0.30 | G | 0.35 |
| rs28365094 | CYP3A5    | 1.19 | 0.82 | 1.72 | 3.49E-01 | G | 0.01 | G | 0.11 |
| rs1891073  | CYP2C8    | 0.90 | 0.72 | 1.12 | 3.50E-01 | C | 0.22 | C | 0.38 |
| rs1934953  | CYP2C8    | 0.90 | 0.72 | 1.12 | 3.50E-01 | G | 0.21 | G | 0.38 |
| rs2273697  | ABCC2     | 0.88 | 0.67 | 1.15 | 3.50E-01 | A | 0.19 | A | 0.19 |

|            |              |      |      |      |          |   |      |   |      |
|------------|--------------|------|------|------|----------|---|------|---|------|
| rs2470146  | CYP19A1      | 1.21 | 0.81 | 1.79 | 3.51E-01 | C | 0.01 | C | 0.07 |
| rs281432   | ICAM1        | 1.10 | 0.90 | 1.35 | 3.51E-01 | C | 0.34 | G | 0.47 |
| rs4648133  | NFKB1        | 1.12 | 0.88 | 1.43 | 3.51E-01 | C | 0.12 | C | 0.29 |
| rs3740469  | SLK          | 1.13 | 0.87 | 1.46 | 3.52E-01 | A | 0.10 | A | 0.23 |
| rs2228065  | ALOX5        | 0.58 | 0.18 | 1.83 | 3.52E-01 | A | 0.07 | A | 0.00 |
| rs10018239 | PPARGC1A     | 1.10 | 0.90 | 1.36 | 3.56E-01 | A | 0.49 | G | 0.36 |
| rs4713858  | PPARD        | 0.87 | 0.64 | 1.17 | 3.56E-01 | A | 0.11 | A | 0.16 |
| rs909253   | LTA          | 0.90 | 0.72 | 1.13 | 3.57E-01 | C | 0.42 | C | 0.38 |
| rs2108622  | CYP4F2       | 1.11 | 0.88 | 1.40 | 3.57E-01 | T | 0.13 | T | 0.30 |
| rs40947    | THAP5        | 0.89 | 0.70 | 1.14 | 3.57E-01 | A | 0.29 | A | 0.30 |
| rs4455491  | UGT2B7       | 1.10 | 0.89 | 1.37 | 3.59E-01 | A | 0.26 | G | 0.50 |
| rs3100699  | HNMT         | 0.70 | 0.33 | 1.49 | 3.60E-01 | C | 0.21 | C | 0.00 |
| rs11569017 | EGF          | 1.23 | 0.79 | 1.93 | 3.60E-01 | T | 0.01 | T | 0.06 |
| rs2972388  | CDK7         | 1.10 | 0.89 | 1.36 | 3.60E-01 | G | 0.27 | G | 0.46 |
| rs3743259  | IGF1R        | 1.11 | 0.89 | 1.38 | 3.60E-01 | G | 0.37 | G | 0.32 |
| rs502570   | ABCB11       | 0.90 | 0.71 | 1.13 | 3.61E-01 | T | 0.10 | T | 0.32 |
| rs7662029  | UGT2B7       | 1.10 | 0.89 | 1.36 | 3.61E-01 | A | 0.26 | G | 0.49 |
| rs359974   | IHH          | 1.15 | 0.85 | 1.55 | 3.61E-01 | C | 0.05 | C | 0.21 |
| rs17829584 | PPP3CA       | 0.85 | 0.60 | 1.21 | 3.61E-01 | C | 0.12 | C | 0.13 |
| rs2307492  | FMO2         | 0.86 | 0.62 | 1.19 | 3.61E-01 | C | 0.16 | C | 0.10 |
| rs1799999  | PPP1R3A      | 1.14 | 0.86 | 1.50 | 3.62E-01 | T | 0.21 | T | 0.13 |
| rs2282079  | LOC100130458 | 0.80 | 0.49 | 1.30 | 3.62E-01 | A | 0.10 | A | 0.05 |
| rs1049007  | BMP2         | 1.11 | 0.89 | 1.38 | 3.62E-01 | A | 0.13 | A | 0.38 |
| rs1873196  | TLR1         | 0.72 | 0.36 | 1.45 | 3.62E-01 | T | 0.13 | T | 0.01 |
| rs2606345  | CYP1A1       | 1.11 | 0.89 | 1.38 | 3.62E-01 | A | 0.14 | C | 0.37 |
| rs11155472 | SIM1         | 0.91 | 0.74 | 1.12 | 3.62E-01 | T | 0.38 | A | 0.49 |
| rs537183   | ABCB11       | 0.90 | 0.71 | 1.13 | 3.63E-01 | G | 0.10 | G | 0.31 |
| rs1805034  | TNFRSF11A    | 0.90 | 0.73 | 1.12 | 3.63E-01 | C | 0.37 | C | 0.46 |
| rs4987875  | ATM          | 0.57 | 0.17 | 1.93 | 3.64E-01 | T | 0.08 | O | 0.00 |
| rs4148551  | ABCC4        | 0.91 | 0.73 | 1.12 | 3.65E-01 | A | 0.45 | G | 0.40 |
| rs2073618  | TNFRSF11B    | 0.90 | 0.72 | 1.13 | 3.65E-01 | C | 0.12 | G | 0.47 |
| rs1736557  | FMO3         | 0.82 | 0.53 | 1.26 | 3.65E-01 | A | 0.05 | A | 0.08 |
| rs2229653  | SPN          | 0.61 | 0.21 | 1.79 | 3.66E-01 | T | 0.08 | O | 0.00 |
| rs2230399  | ICAM3        | 0.84 | 0.57 | 1.23 | 3.67E-01 | C | 0.19 | C | 0.08 |
| rs2598483  | STAT6        | 0.84 | 0.58 | 1.22 | 3.67E-01 | T | 0.03 | T | 0.11 |
| rs4073054  | NR1I3        | 0.91 | 0.74 | 1.12 | 3.67E-01 | G | 0.23 | G | 0.37 |
| rs7709790  | GHR          | 1.12 | 0.87 | 1.44 | 3.68E-01 | G | 0.40 | G | 0.19 |
| rs884716   | SHFM1        | 1.11 | 0.89 | 1.39 | 3.68E-01 | A | 0.29 | A | 0.27 |
| rs2243267  | IL4          | 1.13 | 0.87 | 1.47 | 3.69E-01 | C | 0.37 | C | 0.21 |
| rs1494961  | HELQ         | 0.91 | 0.73 | 1.12 | 3.69E-01 | C | 0.23 | C | 0.48 |
| rs1611764  | SPRR1A       | 0.90 | 0.73 | 1.13 | 3.69E-01 | G | 0.37 | G | 0.46 |
| rs1884725  | XDH          | 1.12 | 0.87 | 1.45 | 3.70E-01 | A | 0.23 | A | 0.23 |
| rs1064796  | CYP4F11      | 0.90 | 0.72 | 1.13 | 3.70E-01 | C | 0.24 | C | 0.26 |
| rs3774968  | NFKB1        | 0.90 | 0.72 | 1.13 | 3.70E-01 | A | 0.20 | A | 0.44 |
| rs3826573  | CTDP1        | 1.11 | 0.88 | 1.40 | 3.70E-01 | T | 0.33 | T | 0.41 |
| rs910416   | ESR1         | 0.91 | 0.74 | 1.12 | 3.71E-01 | C | 0.44 | T | 0.49 |
| rs10079641 | MSH3         | 0.82 | 0.53 | 1.27 | 3.71E-01 | G | 0.07 | G | 0.08 |
| rs4135113  | TDG          | 1.26 | 0.76 | 2.11 | 3.71E-01 | A | 0.18 | A | 0.03 |
| rs1800947  | CRP          | 0.79 | 0.47 | 1.33 | 3.71E-01 | C | 0.02 | C | 0.06 |
| rs228589   | ATM          | 1.10 | 0.89 | 1.37 | 3.72E-01 | A | 0.43 | T | 0.44 |

|           |          |      |      |      |          |   |      |   |      |
|-----------|----------|------|------|------|----------|---|------|---|------|
| rs156641  | LIG1     | 0.90 | 0.72 | 1.13 | 3.72E-01 | A | 0.17 | A | 0.36 |
| rs3770596 | ABCB11   | 0.91 | 0.73 | 1.13 | 3.72E-01 | A | 0.35 | A | 0.46 |
| rs1135148 | BNIP2    | 1.11 | 0.89 | 1.38 | 3.73E-01 | C | 0.14 | C | 0.37 |
| rs2072446 | NGFR     | 0.79 | 0.47 | 1.33 | 3.73E-01 | T | 0.01 | T | 0.05 |
| rs526645  | DPYD     | 0.89 | 0.70 | 1.14 | 3.74E-01 | C | 0.08 | C | 0.27 |
| rs1045105 | CATSPER4 | 0.86 | 0.62 | 1.20 | 3.74E-01 | A | 0.09 | A | 0.12 |
| rs4752904 | PTPRJ    | 1.10 | 0.89 | 1.37 | 3.74E-01 | C | 0.14 | G | 0.44 |
| rs1931072 | DPYD     | 0.90 | 0.72 | 1.13 | 3.74E-01 | A | 0.38 | A | 0.28 |
| rs2465811 | PTPRB    | 0.90 | 0.72 | 1.13 | 3.74E-01 | C | 0.40 | C | 0.29 |
| rs2227551 | PLAU     | 0.90 | 0.71 | 1.14 | 3.74E-01 | G | 0.45 | G | 0.29 |
| rs2037483 | HUS1     | 0.91 | 0.73 | 1.12 | 3.75E-01 | A | 0.33 | G | 0.47 |
| rs7438135 | UGT2B7   | 1.10 | 0.89 | 1.36 | 3.75E-01 | G | 0.26 | A | 0.49 |
| rs7668258 | UGT2B7   | 1.10 | 0.89 | 1.36 | 3.75E-01 | T | 0.26 | C | 0.49 |
| rs1137101 | LEPR     | 0.91 | 0.74 | 1.12 | 3.75E-01 | A | 0.42 | G | 0.46 |
| rs1052637 | DDX18    | 0.90 | 0.72 | 1.13 | 3.75E-01 | G | 0.39 | C | 0.35 |
| rs6104    | SERPINB2 | 1.12 | 0.87 | 1.43 | 3.75E-01 | G | 0.33 | G | 0.24 |
| rs4252749 | CCNI     | 1.35 | 0.69 | 2.64 | 3.76E-01 | C | 0.14 | C | 0.00 |
| rs987539  | PON2     | 1.10 | 0.89 | 1.37 | 3.76E-01 | C | 0.34 | T | 0.48 |
| rs2280712 | PARP1    | 0.87 | 0.64 | 1.18 | 3.77E-01 | A | 0.05 | A | 0.18 |
| rs7164902 | SLC12A6  | 0.89 | 0.70 | 1.15 | 3.77E-01 | A | 0.23 | A | 0.26 |
| rs6919734 | PPARD    | 0.76 | 0.42 | 1.40 | 3.78E-01 | A | 0.11 | A | 0.02 |
| rs1051775 | GSTA1    | 0.90 | 0.72 | 1.13 | 3.78E-01 | G | 0.12 | G | 0.40 |
| rs3738880 | GLI2     | 0.89 | 0.69 | 1.15 | 3.78E-01 | A | 0.41 | C | 0.28 |
| rs2277624 | ABCC3    | 1.12 | 0.87 | 1.43 | 3.78E-01 | A | 0.37 | A | 0.22 |
| rs20432   | PTGS2    | 0.89 | 0.68 | 1.16 | 3.79E-01 | T | 0.43 | G | 0.16 |
| rs770087  | DUSP6    | 1.12 | 0.87 | 1.44 | 3.79E-01 | G | 0.42 | G | 0.19 |
| rs1419745 | CYP3A5   | 1.20 | 0.80 | 1.80 | 3.79E-01 | G | 0.40 | G | 0.04 |
| rs3212723 | JAK3     | 1.44 | 0.64 | 3.27 | 3.80E-01 | A | 0.09 | A | 0.00 |
| rs2227306 | IL8      | 0.91 | 0.73 | 1.13 | 3.80E-01 | T | 0.17 | T | 0.43 |
| rs1130371 | CCL3     | 0.89 | 0.68 | 1.16 | 3.80E-01 | T | 0.12 | T | 0.24 |
| rs967935  | ABCC3    | 1.19 | 0.80 | 1.77 | 3.80E-01 | T | 0.17 | T | 0.06 |
| rs2227307 | IL8      | 0.91 | 0.73 | 1.12 | 3.80E-01 | T | 0.47 | G | 0.47 |
| rs2522397 | RAD50    | 1.24 | 0.77 | 1.99 | 3.81E-01 | T | 0.46 | T | 0.01 |
| rs4648276 | PTGS2    | 0.87 | 0.63 | 1.19 | 3.81E-01 | C | 0.15 | C | 0.13 |
| rs4364    | ACE      | 0.68 | 0.29 | 1.61 | 3.81E-01 | A | 0.11 | A | 0.00 |
| rs7483    | GSTM3    | 1.11 | 0.88 | 1.41 | 3.81E-01 | A | 0.10 | A | 0.31 |
| rs1801275 | IL4R     | 0.90 | 0.70 | 1.15 | 3.81E-01 | A | 0.35 | G | 0.23 |
| rs289747  | NLRC5    | 0.91 | 0.73 | 1.13 | 3.82E-01 | A | 0.39 | A | 0.40 |
| rs2243289 | IL4      | 1.12 | 0.87 | 1.45 | 3.82E-01 | G | 0.24 | G | 0.18 |
| rs3770601 | ABCB11   | 1.17 | 0.82 | 1.66 | 3.82E-01 | T | 0.07 | T | 0.09 |
| rs132806  | NHP2L1   | 0.90 | 0.71 | 1.14 | 3.82E-01 | T | 0.08 | T | 0.35 |
| rs1010844 | CART     | 0.88 | 0.67 | 1.17 | 3.82E-01 | C | 0.47 | C | 0.15 |
| rs299295  | HMMR     | 0.89 | 0.69 | 1.15 | 3.83E-01 | T | 0.28 | T | 0.24 |
| rs2853559 | VDR      | 0.90 | 0.71 | 1.14 | 3.83E-01 | T | 0.20 | T | 0.38 |
| rs4128474 | DPYD     | 1.18 | 0.82 | 1.69 | 3.83E-01 | C | 0.04 | C | 0.11 |
| rs2275586 | MMS19    | 0.76 | 0.41 | 1.40 | 3.83E-01 | G | 0.14 | G | 0.02 |
| rs7732671 | PPARGC1B | 1.15 | 0.84 | 1.58 | 3.84E-01 | C | 0.17 | C | 0.09 |
| rs2440    | XRCC5    | 1.10 | 0.89 | 1.35 | 3.84E-01 | T | 0.27 | T | 0.41 |
| rs3735586 | PON2     | 1.11 | 0.87 | 1.42 | 3.84E-01 | A | 0.27 | A | 0.24 |
| rs861529  | XRCC3    | 1.20 | 0.80 | 1.80 | 3.85E-01 | A | 0.18 | A | 0.05 |

|            |          |      |      |      |          |   |      |   |      |
|------------|----------|------|------|------|----------|---|------|---|------|
| rs3730931  | LIG1     | 1.13 | 0.85 | 1.51 | 3.85E-01 | G | 0.27 | G | 0.12 |
| rs592792   | GSTM2    | 1.14 | 0.85 | 1.54 | 3.86E-01 | A | 0.19 | A | 0.13 |
| rs4986826  | AHR      | 0.53 | 0.13 | 2.23 | 3.86E-01 | A | 0.05 | A | 0.00 |
| rs2276235  | ABCG1    | 0.91 | 0.73 | 1.13 | 3.86E-01 | A | 0.35 | A | 0.41 |
| rs10017295 | BST1     | 0.90 | 0.72 | 1.14 | 3.86E-01 | C | 0.22 | C | 0.29 |
| rs500079   | PPP1R15A | 0.89 | 0.68 | 1.16 | 3.87E-01 | T | 0.45 | C | 0.26 |
| rs599554   | CTDP1    | 1.13 | 0.86 | 1.47 | 3.87E-01 | A | 0.27 | A | 0.16 |
| rs7796976  | AHR      | 1.12 | 0.87 | 1.45 | 3.87E-01 | A | 0.10 | A | 0.23 |
| rs3742424  | PPP2R5C  | 1.16 | 0.83 | 1.60 | 3.88E-01 | C | 0.28 | C | 0.08 |
| rs1614984  | TP53     | 0.91 | 0.73 | 1.13 | 3.88E-01 | T | 0.44 | T | 0.44 |
| rs2275622  | CYP2C8   | 0.91 | 0.72 | 1.13 | 3.88E-01 | T | 0.20 | T | 0.38 |
| rs10264715 | NPC1L1   | 0.89 | 0.68 | 1.16 | 3.89E-01 | A | 0.05 | A | 0.22 |
| rs13815    | MCAT     | 0.91 | 0.73 | 1.13 | 3.89E-01 | G | 0.25 | C | 0.33 |
| rs2246176  | RAD50    | 1.11 | 0.87 | 1.41 | 3.89E-01 | T | 0.37 | C | 0.21 |
| rs6519270  | NHP2L1   | 1.11 | 0.88 | 1.40 | 3.90E-01 | G | 0.35 | A | 0.22 |
| rs11670988 | HIPK4    | 1.18 | 0.81 | 1.70 | 3.90E-01 | T | 0.02 | T | 0.09 |
| rs3730017  | NOS2     | 0.80 | 0.49 | 1.32 | 3.90E-01 | T | 0.21 | T | 0.03 |
| rs4660     | SPP1     | 1.49 | 0.60 | 3.72 | 3.90E-01 | A | 0.06 | A | 0.00 |
| rs3736599  | SULT1E1  | 1.15 | 0.84 | 1.57 | 3.91E-01 | A | 0.16 | A | 0.11 |
| rs2960306  | GRK4     | 0.91 | 0.73 | 1.13 | 3.91E-01 | G | 0.49 | T | 0.35 |
| rs17110453 | CYP2C8   | 1.15 | 0.84 | 1.56 | 3.91E-01 | C | 0.03 | C | 0.14 |
| rs1185193  | SETX     | 1.12 | 0.87 | 1.44 | 3.93E-01 | A | 0.40 | A | 0.17 |
| rs2072352  | BLM      | 0.91 | 0.72 | 1.14 | 3.94E-01 | C | 0.39 | T | 0.28 |
| rs4833095  | TLR1     | 0.90 | 0.71 | 1.14 | 3.94E-01 | T | 0.22 | C | 0.27 |
| rs17655    | ERCC5    | 1.10 | 0.88 | 1.38 | 3.94E-01 | G | 0.44 | G | 0.22 |
| rs1891072  | CYP2C8   | 0.91 | 0.73 | 1.13 | 3.94E-01 | C | 0.20 | C | 0.38 |
| rs6428830  | HSD3B1   | 1.12 | 0.87 | 1.44 | 3.94E-01 | A | 0.08 | A | 0.28 |
| rs700241   | DAB2     | 1.26 | 0.74 | 2.14 | 3.95E-01 | A | 0.14 | A | 0.02 |
| rs4252228  | TAF9     | 1.10 | 0.88 | 1.37 | 3.95E-01 | T | 0.13 | T | 0.45 |
| rs3770603  | ABCB11   | 1.16 | 0.83 | 1.62 | 3.95E-01 | T | 0.16 | T | 0.09 |
| rs11940316 | UGT2B7   | 1.10 | 0.89 | 1.35 | 3.95E-01 | T | 0.26 | C | 0.49 |
| rs13112358 | NEIL3    | 0.90 | 0.71 | 1.15 | 3.95E-01 | C | 0.32 | C | 0.25 |
| rs2072052  | CDK4     | 1.11 | 0.88 | 1.40 | 3.95E-01 | C | 0.06 | C | 0.32 |
| rs1611753  | SPRR1A   | 0.91 | 0.73 | 1.13 | 3.96E-01 | C | 0.45 | C | 0.46 |
| rs1471001  | HNMT     | 0.68 | 0.28 | 1.66 | 3.96E-01 | G | 0.15 | G | 0.00 |
| rs7577677  | UGT1A10  | 1.10 | 0.88 | 1.38 | 3.97E-01 | A | 0.23 | A | 0.37 |
| rs6084     | LIPC     | 0.91 | 0.74 | 1.13 | 3.97E-01 | G | 0.27 | G | 0.48 |
| rs994502   | MYO3A    | 1.11 | 0.87 | 1.42 | 3.97E-01 | T | 0.40 | C | 0.20 |
| rs1471000  | HNMT     | 0.68 | 0.28 | 1.66 | 3.97E-01 | C | 0.15 | C | 0.00 |
| rs3218536  | XRCC2    | 1.18 | 0.80 | 1.74 | 3.98E-01 | A | 0.02 | A | 0.08 |
| rs2685803  | ABCB11   | 0.91 | 0.74 | 1.13 | 3.98E-01 | G | 0.31 | A | 0.44 |
| rs6457816  | PPARD    | 0.86 | 0.61 | 1.22 | 3.99E-01 | T | 0.40 | C | 0.07 |
| rs1043615  | DNAJB9   | 0.91 | 0.73 | 1.14 | 3.99E-01 | A | 0.30 | A | 0.49 |
| rs10018786 | POLN     | 0.88 | 0.65 | 1.18 | 4.00E-01 | T | 0.41 | G | 0.13 |
| rs7853758  | SLC28A3  | 1.12 | 0.86 | 1.48 | 4.00E-01 | A | 0.30 | A | 0.15 |
| rs730365   | PON2     | 0.88 | 0.66 | 1.18 | 4.00E-01 | T | 0.26 | T | 0.14 |
| rs3797896  | MSH3     | 1.16 | 0.82 | 1.63 | 4.00E-01 | G | 0.10 | G | 0.09 |
| rs853783   | ABCB11   | 0.91 | 0.74 | 1.13 | 4.00E-01 | G | 0.43 | T | 0.44 |
| rs1049631  | IL4R     | 0.91 | 0.74 | 1.13 | 4.01E-01 | A | 0.25 | G | 0.47 |
| rs10276036 | ABCB1    | 0.91 | 0.73 | 1.13 | 4.01E-01 | C | 0.27 | C | 0.43 |

|            |          |      |      |      |          |   |      |   |      |
|------------|----------|------|------|------|----------|---|------|---|------|
| rs11569046 | EGF      | 0.64 | 0.23 | 1.81 | 4.02E-01 | C | 0.11 | 0 | 0.00 |
| rs488133   | ESR1     | 1.10 | 0.88 | 1.39 | 4.02E-01 | T | 0.07 | T | 0.30 |
| rs1673026  | POLD1    | 1.16 | 0.82 | 1.65 | 4.02E-01 | T | 0.25 | T | 0.07 |
| rs607887   | LRP5     | 1.10 | 0.88 | 1.36 | 4.02E-01 | C | 0.48 | T | 0.32 |
| rs1044250  | ANGPTL4  | 0.90 | 0.71 | 1.15 | 4.03E-01 | T | 0.24 | T | 0.30 |
| rs3828193  | CHST10   | 1.10 | 0.88 | 1.36 | 4.03E-01 | A | 0.13 | A | 0.48 |
| rs2288378  | IGF1     | 0.90 | 0.69 | 1.16 | 4.03E-01 | A | 0.22 | A | 0.23 |
| rs3743372  | C15orf42 | 1.11 | 0.87 | 1.40 | 4.04E-01 | A | 0.10 | A | 0.34 |
| rs2185571  | CYP2C8   | 0.90 | 0.70 | 1.16 | 4.04E-01 | T | 0.13 | T | 0.28 |
| rs1059262  | ALKBH2   | 1.12 | 0.86 | 1.46 | 4.05E-01 | G | 0.24 | G | 0.17 |
| rs1800822  | FMO3     | 1.19 | 0.79 | 1.77 | 4.05E-01 | T | 0.10 | T | 0.06 |
| rs12254557 | MBL2     | 1.31 | 0.70 | 2.45 | 4.05E-01 | C | 0.11 | C | 0.00 |
| rs4646453  | CYP3A5   | 1.26 | 0.73 | 2.16 | 4.05E-01 | T | 0.07 | T | 0.03 |
| rs4757707  | PTPN5    | 0.90 | 0.70 | 1.15 | 4.06E-01 | C | 0.08 | C | 0.39 |
| rs1520664  | DPYD     | 0.91 | 0.73 | 1.14 | 4.06E-01 | T | 0.44 | T | 0.37 |
| rs348485   | ALDH1A1  | 1.11 | 0.87 | 1.42 | 4.06E-01 | C | 0.22 | C | 0.21 |
| rs2089891  | PPP1R15B | 0.84 | 0.56 | 1.26 | 4.06E-01 | G | 0.05 | G | 0.09 |
| rs1042821  | MSH6     | 1.12 | 0.86 | 1.46 | 4.07E-01 | T | 0.23 | T | 0.18 |
| rs3798134  | RAD50    | 1.11 | 0.87 | 1.41 | 4.07E-01 | T | 0.39 | T | 0.21 |
| rs4150526  | GTF2H1   | 1.10 | 0.88 | 1.38 | 4.08E-01 | G | 0.23 | G | 0.30 |
| rs2241529  | DKK1     | 1.10 | 0.88 | 1.36 | 4.09E-01 | A | 0.29 | A | 0.47 |
| rs1570070  | IGF2R    | 0.91 | 0.72 | 1.14 | 4.09E-01 | G | 0.25 | G | 0.37 |
| rs12721613 | NR1I2    | 0.66 | 0.25 | 1.76 | 4.09E-01 | T | 0.10 | T | 0.00 |
| rs10018622 | KLHL5    | 1.10 | 0.88 | 1.36 | 4.09E-01 | A | 0.37 | G | 0.41 |
| rs2241339  | ABCB11   | 1.15 | 0.83 | 1.60 | 4.09E-01 | T | 0.32 | T | 0.07 |
| rs16931996 | DUSP13   | 0.71 | 0.31 | 1.62 | 4.09E-01 | C | 0.11 | C | 0.00 |
| rs1044141  | STK17A   | 0.89 | 0.67 | 1.18 | 4.09E-01 | A | 0.07 | A | 0.22 |
| rs1051640  | ABCC3    | 1.14 | 0.84 | 1.54 | 4.10E-01 | G | 0.09 | G | 0.16 |
| rs541731   | SPRY2    | 1.09 | 0.89 | 1.35 | 4.10E-01 | A | 0.47 | A | 0.39 |
| rs1803250  | CTSB     | 1.14 | 0.83 | 1.57 | 4.10E-01 | G | 0.07 | G | 0.12 |
| rs2966245  | HSD17B2  | 1.09 | 0.89 | 1.34 | 4.12E-01 | C | 0.34 | C | 0.42 |
| rs6892398  | RAD50    | 0.64 | 0.22 | 1.86 | 4.12E-01 | C | 0.09 | 0 | 0.00 |
| rs2074570  | IL4R     | 0.83 | 0.53 | 1.30 | 4.12E-01 | G | 0.14 | G | 0.05 |
| rs757343   | VDR      | 0.88 | 0.64 | 1.20 | 4.12E-01 | A | 0.07 | A | 0.15 |
| rs3092856  | ATM      | 1.41 | 0.62 | 3.20 | 4.13E-01 | T | 0.08 | T | 0.00 |
| rs740603   | COMT     | 0.91 | 0.74 | 1.13 | 4.13E-01 | G | 0.46 | G | 0.49 |
| rs911605   | TNFSF8   | 0.90 | 0.71 | 1.15 | 4.14E-01 | G | 0.10 | G | 0.29 |
| rs2066470  | MTHFR    | 0.86 | 0.61 | 1.23 | 4.14E-01 | T | 0.10 | T | 0.10 |
| rs1002153  | PARP1    | 0.90 | 0.69 | 1.16 | 4.14E-01 | C | 0.38 | C | 0.18 |
| rs3851294  | RIPK5    | 0.84 | 0.54 | 1.29 | 4.14E-01 | A | 0.02 | A | 0.09 |
| rs715948   | LRP1     | 1.09 | 0.88 | 1.36 | 4.14E-01 | A | 0.20 | A | 0.32 |
| rs1056663  | HUS1     | 0.91 | 0.74 | 1.13 | 4.14E-01 | A | 0.33 | G | 0.47 |
| rs3729512  | LIG1     | 1.13 | 0.84 | 1.52 | 4.14E-01 | A | 0.28 | A | 0.12 |
| rs656583   | LRP5     | 0.78 | 0.44 | 1.41 | 4.14E-01 | C | 0.26 | C | 0.00 |
| rs2235033  | ABCB1    | 1.09 | 0.88 | 1.35 | 4.15E-01 | C | 0.47 | C | 0.50 |
| rs2270422  | GSTZ1    | 0.91 | 0.72 | 1.15 | 4.15E-01 | C | 0.11 | C | 0.41 |
| rs1051685  | XRCC5    | 1.14 | 0.84 | 1.55 | 4.16E-01 | G | 0.30 | G | 0.12 |
| rs9658655  | CHGA     | 1.15 | 0.82 | 1.59 | 4.17E-01 | C | 0.21 | C | 0.08 |
| rs4337089  | SLCO1A2  | 0.86 | 0.60 | 1.23 | 4.17E-01 | T | 0.02 | T | 0.12 |
| rs1130643  | SPARCL1  | 1.13 | 0.84 | 1.51 | 4.17E-01 | G | 0.44 | G | 0.12 |

|             |           |      |      |      |          |   |      |   |      |
|-------------|-----------|------|------|------|----------|---|------|---|------|
| rs4148553   | ABCC4     | 0.92 | 0.74 | 1.13 | 4.18E-01 | A | 0.30 | A | 0.46 |
| rs1520663   | DPYD      | 0.91 | 0.73 | 1.14 | 4.18E-01 | T | 0.43 | T | 0.37 |
| rs10046     | CYP19A1   | 1.09 | 0.88 | 1.36 | 4.19E-01 | T | 0.24 | C | 0.48 |
| rs1805329   | RAD23B    | 0.89 | 0.67 | 1.18 | 4.19E-01 | T | 0.02 | T | 0.22 |
| rs4337789   | UGT2B7    | 1.09 | 0.88 | 1.35 | 4.19E-01 | A | 0.20 | T | 0.49 |
| rs133417    | MCM5      | 0.83 | 0.54 | 1.30 | 4.19E-01 | C | 0.19 | C | 0.05 |
| rs3211892   | CD36      | 1.22 | 0.75 | 1.99 | 4.19E-01 | A | 0.22 | A | 0.02 |
| rs11407     | LOC390940 | 1.12 | 0.85 | 1.49 | 4.19E-01 | A | 0.15 | A | 0.18 |
| rs207908    | XRCC5     | 0.92 | 0.74 | 1.13 | 4.20E-01 | T | 0.49 | T | 0.48 |
| rs4364327   | UGT2B7    | 1.09 | 0.88 | 1.35 | 4.21E-01 | C | 0.20 | T | 0.49 |
| rs367836    | GSTA4     | 1.09 | 0.88 | 1.35 | 4.21E-01 | C | 0.47 | C | 0.42 |
| rs799923    | BRCA1     | 0.89 | 0.67 | 1.18 | 4.21E-01 | A | 0.03 | A | 0.21 |
| rs162555    | CYP1B1    | 0.89 | 0.68 | 1.18 | 4.21E-01 | G | 0.19 | G | 0.19 |
| rs6413436   | RAD52     | 1.10 | 0.88 | 1.37 | 4.21E-01 | C | 0.29 | C | 0.41 |
| rs2368564   | REN       | 0.91 | 0.72 | 1.15 | 4.22E-01 | C | 0.31 | T | 0.26 |
| rs7081      | SLC5A6    | 0.86 | 0.60 | 1.24 | 4.22E-01 | A | 0.50 | G | 0.06 |
| rs241448    | TAP2      | 0.90 | 0.71 | 1.16 | 4.22E-01 | C | 0.20 | C | 0.23 |
| rs1467558   | CD44      | 0.89 | 0.66 | 1.19 | 4.22E-01 | A | 0.04 | A | 0.17 |
| rs13706     | CDC6      | 0.88 | 0.65 | 1.20 | 4.22E-01 | A | 0.42 | A | 0.12 |
| rs1058932   | CYP2C8    | 1.11 | 0.86 | 1.44 | 4.22E-01 | T | 0.35 | T | 0.18 |
| rs2522406   | RAD50     | 0.78 | 0.42 | 1.44 | 4.22E-01 | T | 0.26 | T | 0.01 |
| rs2306508   | FNDC8     | 1.09 | 0.88 | 1.35 | 4.22E-01 | A | 0.14 | A | 0.45 |
| rs2303317   | ALDH1A1   | 0.92 | 0.75 | 1.13 | 4.24E-01 | T | 0.22 | T | 0.50 |
| rs2671272   | EPHX1     | 0.90 | 0.70 | 1.16 | 4.24E-01 | C | 0.45 | T | 0.21 |
| rs2049110   | DPYD      | 0.65 | 0.23 | 1.87 | 4.24E-01 | A | 0.10 | O | 0.00 |
| rs610308    | PPP1R15A  | 0.91 | 0.72 | 1.15 | 4.25E-01 | T | 0.25 | C | 0.31 |
| rs16879427  | PSKH2     | 0.79 | 0.44 | 1.41 | 4.25E-01 | C | 0.31 | C | 0.00 |
| rs2292305   | THBS1     | 0.89 | 0.66 | 1.19 | 4.26E-01 | C | 0.44 | C | 0.13 |
| rs3798343   | PPARD     | 0.83 | 0.52 | 1.32 | 4.27E-01 | G | 0.17 | G | 0.03 |
| rs35596     | ABCC1     | 0.91 | 0.71 | 1.15 | 4.27E-01 | T | 0.38 | C | 0.23 |
| rs12338     | CTSB      | 1.10 | 0.87 | 1.38 | 4.27E-01 | G | 0.34 | G | 0.37 |
| rs2228527   | ERCC6     | 0.90 | 0.69 | 1.17 | 4.28E-01 | G | 0.14 | G | 0.22 |
| rs1545981   | IL17RD    | 0.88 | 0.65 | 1.20 | 4.28E-01 | T | 0.22 | T | 0.11 |
| rs3774932   | NFKB1     | 0.91 | 0.73 | 1.14 | 4.29E-01 | A | 0.27 | A | 0.45 |
| rs610529    | ALDH1A1   | 1.09 | 0.89 | 1.33 | 4.29E-01 | C | 0.46 | C | 0.46 |
| rs2267668   | PPARD     | 0.89 | 0.67 | 1.18 | 4.30E-01 | G | 0.12 | G | 0.17 |
| rs2227932   | ATR       | 0.86 | 0.59 | 1.26 | 4.30E-01 | C | 0.01 | C | 0.10 |
| rs7102464   | SBF2      | 0.84 | 0.55 | 1.29 | 4.31E-01 | T | 0.02 | T | 0.09 |
| rs853790    | ABCB11    | 0.92 | 0.74 | 1.14 | 4.31E-01 | A | 0.34 | T | 0.45 |
| rs2973015   | GHR       | 0.92 | 0.74 | 1.14 | 4.31E-01 | G | 0.41 | G | 0.46 |
| rs1760944   | APEX1     | 1.09 | 0.88 | 1.34 | 4.31E-01 | A | 0.34 | A | 0.40 |
| rs2892806   | ABCB11    | 1.19 | 0.78 | 1.81 | 4.31E-01 | T | 0.06 | T | 0.05 |
| rs20551     | EP300     | 1.10 | 0.87 | 1.39 | 4.31E-01 | G | 0.07 | G | 0.28 |
| rs696217    | GHRL      | 0.84 | 0.55 | 1.30 | 4.32E-01 | T | 0.01 | T | 0.08 |
| rs7588635   | MERTK     | 1.28 | 0.69 | 2.40 | 4.32E-01 | A | 0.15 | A | 0.00 |
| rs2032582_A | ABCB1     | 0.91 | 0.73 | 1.15 | 4.32E-01 | T | 0.07 | T | 0.45 |
| rs8178318   | LPO       | 0.56 | 0.13 | 2.37 | 4.32E-01 | T | 0.06 | T | 0.00 |
| rs16975748  | LIPE      | 1.41 | 0.60 | 3.35 | 4.33E-01 | T | 0.10 | T | 0.00 |
| rs207905    | XRCC5     | 0.88 | 0.63 | 1.22 | 4.33E-01 | G | 0.19 | G | 0.13 |
| rs6103      | SERPIN2   | 1.10 | 0.86 | 1.41 | 4.34E-01 | G | 0.34 | G | 0.24 |

|            |          |      |      |      |          |   |      |   |      |
|------------|----------|------|------|------|----------|---|------|---|------|
| rs1052763  | DGCR14   | 0.90 | 0.70 | 1.16 | 4.34E-01 | T | 0.37 | T | 0.19 |
| rs2193831  | ABCB11   | 0.92 | 0.74 | 1.14 | 4.34E-01 | G | 0.43 | G | 0.38 |
| rs17572019 | PPARGC1B | 1.15 | 0.81 | 1.63 | 4.34E-01 | A | 0.02 | A | 0.09 |
| rs4148951  | CHST3    | 1.30 | 0.67 | 2.51 | 4.35E-01 | A | 0.16 | A | 0.01 |
| rs2854455  | EPHX1    | 0.90 | 0.70 | 1.16 | 4.35E-01 | T | 0.45 | C | 0.21 |
| rs4588522  | UGT2B7   | 1.09 | 0.88 | 1.35 | 4.35E-01 | C | 0.21 | G | 0.49 |
| rs2305799  | ACP5     | 0.87 | 0.61 | 1.24 | 4.35E-01 | T | 0.04 | T | 0.11 |
| rs2228088  | TNF      | 0.63 | 0.20 | 2.02 | 4.36E-01 | T | 0.05 | T | 0.01 |
| rs2229531  | ACP5     | 0.86 | 0.60 | 1.25 | 4.37E-01 | A | 0.03 | A | 0.11 |
| rs1126580  | IL8RB    | 0.91 | 0.72 | 1.15 | 4.37E-01 | A | 0.43 | A | 0.41 |
| rs1130496  | PTPRN2   | 0.92 | 0.73 | 1.14 | 4.38E-01 | A | 0.18 | A | 0.44 |
| rs1822825  | PPARG    | 1.09 | 0.88 | 1.35 | 4.38E-01 | C | 0.20 | C | 0.46 |
| rs669674   | GSTA4    | 1.14 | 0.82 | 1.59 | 4.38E-01 | T | 0.05 | T | 0.10 |
| rs4536     | CYP11B2  | 1.18 | 0.77 | 1.80 | 4.38E-01 | A | 0.25 | A | 0.03 |
| rs348457   | ALDH1A1  | 1.08 | 0.88 | 1.33 | 4.38E-01 | G | 0.46 | G | 0.46 |
| rs696221   | SEC13    | 0.92 | 0.74 | 1.14 | 4.39E-01 | C | 0.22 | C | 0.45 |
| rs3177429  | GSTZ1    | 0.85 | 0.57 | 1.28 | 4.39E-01 | A | 0.03 | A | 0.09 |
| rs246218   | ABCC1    | 0.89 | 0.67 | 1.19 | 4.40E-01 | T | 0.16 | T | 0.14 |
| rs1799941  | SHBG     | 0.90 | 0.69 | 1.17 | 4.40E-01 | A | 0.08 | A | 0.26 |
| rs8187915  | ALDH1A1  | 0.92 | 0.75 | 1.14 | 4.40E-01 | T | 0.21 | T | 0.49 |
| rs3024491  | IL10     | 0.92 | 0.73 | 1.15 | 4.41E-01 | T | 0.32 | T | 0.44 |
| rs2078486  | TP53     | 1.13 | 0.83 | 1.53 | 4.41E-01 | A | 0.29 | A | 0.09 |
| rs3813627  | APOA2    | 1.09 | 0.87 | 1.37 | 4.41E-01 | T | 0.12 | T | 0.35 |
| rs3760413  | EME1     | 0.89 | 0.65 | 1.21 | 4.41E-01 | T | 0.02 | T | 0.15 |
| rs2412504  | PAK6     | 0.86 | 0.60 | 1.25 | 4.41E-01 | G | 0.27 | G | 0.08 |
| rs7797834  | CYP51A1  | 1.09 | 0.88 | 1.35 | 4.42E-01 | G | 0.45 | G | 0.38 |
| rs1800890  | IL10     | 0.91 | 0.73 | 1.15 | 4.42E-01 | A | 0.28 | A | 0.37 |
| rs1537015  | TNC      | 1.09 | 0.88 | 1.35 | 4.42E-01 | T | 0.46 | C | 0.35 |
| rs169547   | BRCA2    | 0.63 | 0.19 | 2.05 | 4.42E-01 | A | 0.07 | A | 0.00 |
| rs3025039  | VEGFA    | 1.12 | 0.84 | 1.51 | 4.42E-01 | T | 0.11 | T | 0.15 |
| rs7441774  | UGT2B7   | 1.10 | 0.87 | 1.38 | 4.43E-01 | G | 0.22 | G | 0.46 |
| rs7643645  | NR1I2    | 1.09 | 0.87 | 1.36 | 4.43E-01 | G | 0.12 | G | 0.39 |
| rs1946235  | GPX3     | 0.88 | 0.64 | 1.21 | 4.43E-01 | C | 0.20 | C | 0.15 |
| rs3897933  | DPYD     | 0.91 | 0.72 | 1.15 | 4.43E-01 | A | 0.27 | A | 0.28 |
| rs7921     | CD79B    | 1.09 | 0.87 | 1.38 | 4.43E-01 | T | 0.28 | T | 0.25 |
| rs3136430  | F2       | 0.65 | 0.22 | 1.95 | 4.43E-01 | T | 0.07 | T | 0.00 |
| rs6041884  | FKBP1A   | 1.09 | 0.87 | 1.36 | 4.43E-01 | G | 0.28 | G | 0.29 |
| rs805657   | SLK      | 0.90 | 0.68 | 1.18 | 4.44E-01 | A | 0.33 | A | 0.17 |
| rs1801280  | NAT2     | 0.92 | 0.75 | 1.14 | 4.45E-01 | C | 0.26 | C | 0.43 |
| rs2305706  | CYP19A1  | 1.11 | 0.85 | 1.44 | 4.45E-01 | A | 0.47 | G | 0.19 |
| rs6098     | SERPINB2 | 1.10 | 0.86 | 1.41 | 4.45E-01 | G | 0.34 | G | 0.24 |
| rs6868365  | RAD50    | 0.56 | 0.13 | 2.48 | 4.46E-01 | T | 0.06 | O | 0.00 |
| rs998074   | IGF2R    | 0.92 | 0.74 | 1.14 | 4.46E-01 | A | 0.38 | G | 0.49 |
| rs9503893  | PRPF4B   | 0.91 | 0.72 | 1.15 | 4.47E-01 | A | 0.27 | A | 0.32 |
| rs7089422  | CYP17A1  | 0.90 | 0.67 | 1.19 | 4.48E-01 | T | 0.10 | T | 0.16 |
| rs8191613  | NEIL2    | 1.27 | 0.68 | 2.36 | 4.48E-01 | A | 0.06 | A | 0.02 |
| rs2241230  | SCARF2   | 1.16 | 0.79 | 1.69 | 4.49E-01 | T | 0.12 | T | 0.10 |
| rs2331390  | IGFBP1   | 0.92 | 0.74 | 1.14 | 4.49E-01 | A | 0.42 | A | 0.48 |
| rs3730849  | LIG1     | 0.92 | 0.73 | 1.15 | 4.49E-01 | T | 0.16 | T | 0.37 |
| rs5030737  | MBL2     | 0.84 | 0.54 | 1.31 | 4.49E-01 | T | 0.02 | T | 0.08 |

|            |          |      |      |      |          |   |      |   |      |
|------------|----------|------|------|------|----------|---|------|---|------|
| rs35620    | ABCC1    | 1.12 | 0.84 | 1.49 | 4.50E-01 | G | 0.09 | G | 0.18 |
| rs1798745  | DPYD     | 0.71 | 0.29 | 1.73 | 4.50E-01 | T | 0.14 | T | 0.00 |
| rs3783615  | VCAM1    | 0.46 | 0.06 | 3.42 | 4.50E-01 | T | 0.05 | T | 0.00 |
| rs182623   | GSTA4    | 1.09 | 0.87 | 1.36 | 4.50E-01 | A | 0.42 | A | 0.27 |
| rs853772   | ABCB11   | 1.09 | 0.88 | 1.34 | 4.51E-01 | A | 0.30 | C | 0.46 |
| rs1527463  | CD36     | 0.75 | 0.35 | 1.60 | 4.51E-01 | G | 0.06 | G | 0.02 |
| rs16839100 | FCRL2    | 1.44 | 0.55 | 3.76 | 4.52E-01 | T | 0.05 | T | 0.00 |
| rs35683    | GHRL     | 0.92 | 0.75 | 1.14 | 4.52E-01 | A | 0.35 | A | 0.45 |
| rs983101   | DPYD     | 1.51 | 0.52 | 4.40 | 4.52E-01 | C | 0.05 | O | 0.00 |
| rs769224   | COMT     | 1.20 | 0.74 | 1.94 | 4.53E-01 | A | 0.11 | A | 0.04 |
| rs7006788  | C8orf42  | 0.92 | 0.73 | 1.15 | 4.53E-01 | T | 0.19 | T | 0.37 |
| rs1063743  | TACC3    | 0.91 | 0.72 | 1.16 | 4.53E-01 | A | 0.15 | A | 0.26 |
| rs348445   | ALDH1A1  | 1.19 | 0.75 | 1.89 | 4.53E-01 | T | 0.13 | T | 0.03 |
| rs139884   | SOX10    | 1.09 | 0.87 | 1.36 | 4.54E-01 | A | 0.19 | A | 0.36 |
| rs3448     | GPX1     | 0.91 | 0.71 | 1.17 | 4.54E-01 | T | 0.28 | T | 0.25 |
| rs2010963  | VEGFA    | 0.92 | 0.74 | 1.14 | 4.54E-01 | C | 0.31 | C | 0.31 |
| rs1801131  | MTHFR    | 1.09 | 0.87 | 1.37 | 4.54E-01 | C | 0.10 | C | 0.33 |
| rs3212961  | ERCC1    | 1.11 | 0.84 | 1.47 | 4.55E-01 | A | 0.25 | A | 0.14 |
| rs2287623  | ABCB11   | 0.92 | 0.74 | 1.14 | 4.55E-01 | C | 0.43 | C | 0.38 |
| rs2161811  | ALDH1A1  | 0.92 | 0.75 | 1.14 | 4.56E-01 | G | 0.23 | G | 0.49 |
| rs5993875  | TXNRD2   | 1.08 | 0.88 | 1.33 | 4.56E-01 | A | 0.29 | A | 0.43 |
| rs1805405  | PARP1    | 0.91 | 0.70 | 1.18 | 4.57E-01 | A | 0.37 | A | 0.18 |
| rs1799955  | BRCA2    | 1.10 | 0.85 | 1.43 | 4.57E-01 | G | 0.27 | G | 0.22 |
| rs17064676 | NEIL3    | 1.33 | 0.63 | 2.81 | 4.57E-01 | G | 0.09 | G | 0.00 |
| rs4148947  | CHST3    | 1.08 | 0.88 | 1.33 | 4.58E-01 | C | 0.29 | C | 0.46 |
| rs2292245  | PTPRG    | 0.89 | 0.66 | 1.21 | 4.58E-01 | A | 0.13 | A | 0.16 |
| rs921519   | ERICH1   | 0.90 | 0.68 | 1.19 | 4.58E-01 | C | 0.14 | C | 0.21 |
| rs1200314  | CYP2C9   | 0.83 | 0.50 | 1.37 | 4.58E-01 | C | 0.10 | C | 0.04 |
| rs2292334  | SLC22A3  | 0.92 | 0.74 | 1.15 | 4.59E-01 | T | 0.15 | T | 0.40 |
| rs3217805  | CCND2    | 0.92 | 0.73 | 1.15 | 4.59E-01 | G | 0.17 | G | 0.39 |
| rs3816540  | RPS6KA1  | 0.90 | 0.67 | 1.19 | 4.59E-01 | C | 0.05 | C | 0.21 |
| rs7731453  | HMMR     | 0.88 | 0.64 | 1.23 | 4.59E-01 | A | 0.03 | A | 0.12 |
| rs4531     | DBH      | 0.86 | 0.58 | 1.28 | 4.60E-01 | T | 0.09 | T | 0.08 |
| rs7290221  | COMT     | 0.93 | 0.76 | 1.14 | 4.60E-01 | C | 0.47 | G | 0.48 |
| rs865242   | DPYD     | 0.91 | 0.72 | 1.16 | 4.61E-01 | G | 0.15 | G | 0.28 |
| rs598599   | MRE11A   | 1.09 | 0.86 | 1.38 | 4.61E-01 | A | 0.17 | A | 0.29 |
| rs1799801  | ERCC4    | 1.09 | 0.87 | 1.37 | 4.61E-01 | C | 0.19 | C | 0.28 |
| rs426169   | GSTA4    | 0.92 | 0.75 | 1.14 | 4.61E-01 | T | 0.40 | C | 0.49 |
| rs8053     | PSMA4    | 1.08 | 0.87 | 1.35 | 4.63E-01 | T | 0.19 | T | 0.42 |
| rs2242665  | SLC44A4  | 1.08 | 0.87 | 1.35 | 4.64E-01 | G | 0.35 | G | 0.47 |
| rs2546893  | IL12B    | 0.92 | 0.74 | 1.14 | 4.64E-01 | A | 0.29 | A | 0.49 |
| rs894157   | C15orf42 | 1.14 | 0.80 | 1.63 | 4.64E-01 | C | 0.02 | C | 0.10 |
| rs2790     | TYMS     | 0.91 | 0.70 | 1.18 | 4.64E-01 | G | 0.29 | G | 0.21 |
| rs1137282  | KRAS     | 1.09 | 0.86 | 1.39 | 4.64E-01 | C | 0.17 | C | 0.21 |
| rs17473423 | KRAS     | 1.09 | 0.86 | 1.39 | 4.64E-01 | G | 0.17 | G | 0.21 |
| rs2256327  | FAM82A   | 0.91 | 0.69 | 1.18 | 4.65E-01 | G | 0.25 | G | 0.20 |
| rs6180     | GHR      | 0.92 | 0.74 | 1.15 | 4.65E-01 | C | 0.44 | C | 0.45 |
| rs2855262  | SOD3     | 0.92 | 0.73 | 1.15 | 4.66E-01 | C | 0.18 | T | 0.36 |
| rs6046     | F7       | 0.88 | 0.64 | 1.23 | 4.66E-01 | T | 0.15 | T | 0.10 |
| rs864373   | ABCB11   | 0.92 | 0.75 | 1.14 | 4.66E-01 | C | 0.44 | T | 0.45 |

|            |            |      |      |      |          |   |      |   |      |
|------------|------------|------|------|------|----------|---|------|---|------|
| rs2008691  | CYP19A1    | 1.10 | 0.85 | 1.42 | 4.66E-01 | G | 0.41 | G | 0.17 |
| rs4220     | FGB        | 1.11 | 0.84 | 1.45 | 4.66E-01 | A | 0.08 | A | 0.18 |
| rs2048074  | NEIL3      | 0.91 | 0.72 | 1.17 | 4.67E-01 | A | 0.32 | A | 0.25 |
| rs2229712  | RPS6KA1    | 0.90 | 0.68 | 1.20 | 4.67E-01 | C | 0.05 | C | 0.21 |
| rs3212219  | IL12B      | 1.09 | 0.86 | 1.39 | 4.67E-01 | T | 0.32 | T | 0.24 |
| rs3138052  | NFKBIA     | 0.92 | 0.72 | 1.16 | 4.67E-01 | G | 0.28 | G | 0.27 |
| rs1295686  | IL13       | 1.09 | 0.86 | 1.39 | 4.68E-01 | G | 0.33 | A | 0.22 |
| rs3740955  | RAG1       | 1.09 | 0.87 | 1.36 | 4.69E-01 | A | 0.26 | G | 0.35 |
| rs2020873  | MLH1       | 0.65 | 0.21 | 2.07 | 4.69E-01 | T | 0.09 | O | 0.00 |
| rs2854184  | GH1        | 0.92 | 0.74 | 1.15 | 4.69E-01 | T | 0.18 | T | 0.41 |
| rs1048013  | CYP20A1    | 0.93 | 0.76 | 1.14 | 4.69E-01 | T | 0.24 | C | 0.45 |
| rs348476   | ALDH1A1    | 1.27 | 0.66 | 2.46 | 4.69E-01 | C | 0.08 | C | 0.00 |
| rs2363642  | GSTZ1      | 0.92 | 0.73 | 1.16 | 4.71E-01 | T | 0.30 | T | 0.29 |
| rs43038    | PON2       | 0.90 | 0.67 | 1.21 | 4.72E-01 | G | 0.28 | G | 0.14 |
| rs2267669  | PPARD      | 0.90 | 0.67 | 1.20 | 4.72E-01 | G | 0.12 | G | 0.17 |
| rs6063528  | PTPN1      | 1.08 | 0.87 | 1.34 | 4.72E-01 | A | 0.32 | A | 0.38 |
| rs3764340  | WWOX       | 0.85 | 0.54 | 1.33 | 4.73E-01 | G | 0.10 | G | 0.06 |
| rs17110944 | PDGFRB     | 1.25 | 0.68 | 2.28 | 4.73E-01 | A | 0.22 | A | 0.00 |
| rs1805403  | PARP1      | 0.91 | 0.70 | 1.18 | 4.73E-01 | A | 0.06 | A | 0.23 |
| rs2260655  | DAK        | 1.18 | 0.75 | 1.88 | 4.74E-01 | G | 0.50 | G | 0.01 |
| rs316132   | GSTA4      | 1.08 | 0.87 | 1.33 | 4.74E-01 | G | 0.49 | G | 0.42 |
| rs3785457  | PCGF2      | 0.90 | 0.66 | 1.21 | 4.74E-01 | A | 0.12 | A | 0.16 |
| rs13418420 | UGT1A10    | 0.91 | 0.71 | 1.17 | 4.74E-01 | C | 0.19 | C | 0.26 |
| rs3218005  | CDKN2B     | 1.13 | 0.81 | 1.58 | 4.75E-01 | G | 0.27 | G | 0.10 |
| rs1319869  | IGF1R      | 1.10 | 0.84 | 1.45 | 4.76E-01 | A | 0.38 | C | 0.11 |
| rs4713853  | PPARD      | 0.90 | 0.66 | 1.21 | 4.76E-01 | T | 0.33 | C | 0.10 |
| rs998075   | IGF2R      | 0.93 | 0.75 | 1.14 | 4.76E-01 | T | 0.37 | C | 0.49 |
| rs2274405  | ABCC4      | 0.92 | 0.74 | 1.15 | 4.77E-01 | T | 0.32 | T | 0.35 |
| rs8187737  | SLC28A1    | 1.36 | 0.58 | 3.17 | 4.77E-01 | T | 0.07 | T | 0.00 |
| rs1885472  | SIRT1      | 1.08 | 0.87 | 1.33 | 4.78E-01 | G | 0.35 | G | 0.36 |
| rs8058696  | ABCC6      | 0.92 | 0.74 | 1.15 | 4.78E-01 | C | 0.35 | G | 0.50 |
| rs25648    | VEGFA      | 1.10 | 0.84 | 1.45 | 4.78E-01 | T | 0.06 | T | 0.17 |
| rs10018064 | Intergenic | 0.92 | 0.74 | 1.15 | 4.79E-01 | C | 0.35 | C | 0.41 |
| rs2228526  | ERCC6      | 0.91 | 0.70 | 1.18 | 4.80E-01 | G | 0.12 | G | 0.22 |
| rs2069835  | IL6        | 0.85 | 0.55 | 1.33 | 4.80E-01 | C | 0.10 | C | 0.06 |
| rs7208693  | MPO        | 0.87 | 0.59 | 1.29 | 4.81E-01 | A | 0.16 | A | 0.07 |
| rs8679     | PARP1      | 0.91 | 0.70 | 1.18 | 4.82E-01 | C | 0.06 | C | 0.23 |
| rs7242     | SERPINE1   | 0.92 | 0.74 | 1.15 | 4.83E-01 | T | 0.49 | G | 0.42 |
| rs6761641  | PASK       | 0.91 | 0.69 | 1.19 | 4.83E-01 | A | 0.49 | C | 0.13 |
| rs5496     | ICAM1      | 0.66 | 0.21 | 2.11 | 4.83E-01 | A | 0.09 | A | 0.00 |
| rs651852   | BHMT       | 1.08 | 0.87 | 1.33 | 4.84E-01 | A | 0.22 | A | 0.49 |
| rs1057056  | CHST10     | 1.17 | 0.75 | 1.81 | 4.84E-01 | A | 0.35 | A | 0.02 |
| rs9328764  | POLN       | 0.90 | 0.67 | 1.21 | 4.84E-01 | G | 0.44 | A | 0.13 |
| rs2238475  | ABCC1      | 1.20 | 0.72 | 1.99 | 4.84E-01 | C | 0.03 | C | 0.05 |
| rs2075800  | HSPA1L     | 1.09 | 0.86 | 1.37 | 4.85E-01 | A | 0.08 | A | 0.32 |
| rs1050152  | SLC22A4    | 0.92 | 0.72 | 1.17 | 4.85E-01 | T | 0.05 | T | 0.37 |
| rs2229113  | IL10RA     | 1.08 | 0.86 | 1.36 | 4.85E-01 | A | 0.21 | A | 0.31 |
| rs2725362  | WRN        | 0.93 | 0.75 | 1.15 | 4.85E-01 | G | 0.50 | T | 0.44 |
| rs2234721  | ABCG1      | 0.92 | 0.73 | 1.16 | 4.86E-01 | T | 0.24 | T | 0.35 |
| rs2157930  | ABCB1      | 0.90 | 0.66 | 1.22 | 4.87E-01 | T | 0.14 | T | 0.22 |

|            |           |      |      |      |          |   |      |   |      |
|------------|-----------|------|------|------|----------|---|------|---|------|
| rs610899   | MRE11A    | 1.08 | 0.87 | 1.33 | 4.87E-01 | G | 0.37 | G | 0.43 |
| rs17563    | BMP4      | 0.93 | 0.76 | 1.14 | 4.87E-01 | C | 0.23 | T | 0.45 |
| rs6817280  | HELQ      | 1.23 | 0.68 | 2.22 | 4.88E-01 | A | 0.29 | A | 0.00 |
| rs1138357  | BCL2A1    | 1.08 | 0.86 | 1.36 | 4.88E-01 | A | 0.28 | A | 0.29 |
| rs6413419  | CYP2E1    | 1.21 | 0.71 | 2.06 | 4.88E-01 | A | 0.18 | A | 0.02 |
| rs2681417  | CD86      | 0.88 | 0.60 | 1.28 | 4.88E-01 | G | 0.34 | G | 0.07 |
| rs2242048  | SLC28A1   | 1.12 | 0.81 | 1.57 | 4.89E-01 | T | 0.04 | T | 0.12 |
| rs187238   | IL18      | 1.08 | 0.86 | 1.36 | 4.90E-01 | G | 0.23 | G | 0.27 |
| rs11003127 | MBL2      | 1.08 | 0.86 | 1.36 | 4.90E-01 | G | 0.45 | C | 0.22 |
| rs207906   | XRCC5     | 0.89 | 0.63 | 1.25 | 4.90E-01 | A | 0.10 | A | 0.13 |
| rs3759207  | MGST1     | 0.92 | 0.73 | 1.16 | 4.90E-01 | G | 0.26 | G | 0.31 |
| rs1800392  | WRN       | 0.93 | 0.75 | 1.15 | 4.91E-01 | T | 0.40 | T | 0.45 |
| rs2972393  | GHR       | 1.08 | 0.87 | 1.35 | 4.91E-01 | G | 0.49 | A | 0.41 |
| rs769217   | CAT       | 0.91 | 0.70 | 1.19 | 4.92E-01 | T | 0.16 | T | 0.23 |
| rs4148217  | ABCG8     | 1.09 | 0.85 | 1.41 | 4.92E-01 | A | 0.29 | A | 0.20 |
| rs2282140  | IGF2R     | 0.89 | 0.63 | 1.25 | 4.92E-01 | T | 0.15 | T | 0.13 |
| rs7071882  | MBL2      | 1.08 | 0.86 | 1.36 | 4.93E-01 | G | 0.46 | T | 0.21 |
| rs3749442  | ABCC5     | 0.91 | 0.69 | 1.20 | 4.93E-01 | T | 0.18 | T | 0.20 |
| rs1805335  | RAD23B    | 1.08 | 0.87 | 1.32 | 4.93E-01 | A | 0.42 | A | 0.45 |
| rs1946518  | IL18      | 1.08 | 0.87 | 1.34 | 4.93E-01 | T | 0.35 | T | 0.41 |
| rs7514102  | PROK1     | 1.08 | 0.87 | 1.34 | 4.94E-01 | A | 0.41 | A | 0.42 |
| rs1341162  | CYP2C8    | 1.09 | 0.85 | 1.40 | 4.94E-01 | A | 0.44 | A | 0.20 |
| rs316133   | GSTA4     | 1.08 | 0.87 | 1.33 | 4.94E-01 | C | 0.49 | C | 0.42 |
| rs673197   | GSTA4     | 1.08 | 0.87 | 1.33 | 4.94E-01 | A | 0.49 | A | 0.42 |
| rs8018462  | SLC7A7    | 1.08 | 0.87 | 1.34 | 4.94E-01 | G | 0.47 | A | 0.45 |
| rs1555026  | ID3       | 1.15 | 0.77 | 1.72 | 4.94E-01 | C | 0.16 | C | 0.06 |
| rs17006794 | HELQ      | 0.71 | 0.27 | 1.88 | 4.95E-01 | T | 0.11 | O | 0.00 |
| rs6935443  | ESR1      | 1.09 | 0.85 | 1.39 | 4.96E-01 | A | 0.42 | G | 0.22 |
| rs874401   | LOC729734 | 0.91 | 0.71 | 1.18 | 4.96E-01 | T | 0.25 | T | 0.20 |
| rs5970     | F11       | 1.11 | 0.82 | 1.50 | 4.96E-01 | C | 0.19 | C | 0.15 |
| rs664677   | ATM       | 1.08 | 0.87 | 1.33 | 4.97E-01 | C | 0.23 | C | 0.43 |
| rs730720   | CHST3     | 1.07 | 0.87 | 1.32 | 4.99E-01 | A | 0.44 | A | 0.47 |
| rs2072351  | BLM       | 0.93 | 0.74 | 1.16 | 4.99E-01 | A | 0.48 | T | 0.28 |
| rs4764883  | IGF1      | 0.92 | 0.73 | 1.16 | 4.99E-01 | T | 0.46 | C | 0.29 |
| rs9282718  | IGF1R     | 1.14 | 0.78 | 1.67 | 4.99E-01 | G | 0.07 | G | 0.06 |
| rs16480    | NPY       | 0.92 | 0.72 | 1.17 | 4.99E-01 | C | 0.38 | C | 0.21 |
| rs2277461  | PSMA6     | 1.14 | 0.78 | 1.65 | 5.00E-01 | C | 0.34 | C | 0.05 |
| rs2288087  | ALDH1A1   | 0.93 | 0.75 | 1.15 | 5.00E-01 | T | 0.22 | T | 0.50 |
| rs7103126  | MYEOV     | 0.92 | 0.71 | 1.18 | 5.00E-01 | T | 0.26 | C | 0.21 |
| rs689470   | PTGS2     | 0.87 | 0.58 | 1.31 | 5.00E-01 | T | 0.42 | T | 0.03 |
| rs3181218  | IL12B     | 1.09 | 0.86 | 1.38 | 5.01E-01 | A | 0.32 | A | 0.24 |
| rs9352     | CHAF1A    | 0.93 | 0.75 | 1.15 | 5.01E-01 | T | 0.49 | C | 0.43 |
| rs2938395  | PPARG     | 0.92 | 0.73 | 1.16 | 5.01E-01 | C | 0.20 | C | 0.37 |
| rs10249476 | LEP       | 1.08 | 0.87 | 1.34 | 5.01E-01 | T | 0.31 | T | 0.38 |
| rs8192341  | BMP1      | 0.91 | 0.70 | 1.19 | 5.01E-01 | A | 0.06 | A | 0.25 |
| rs10794486 | IGF1R     | 1.08 | 0.86 | 1.35 | 5.01E-01 | A | 0.38 | G | 0.31 |
| rs6031     | F5        | 1.35 | 0.56 | 3.22 | 5.02E-01 | T | 0.07 | T | 0.00 |
| rs1491961  | CCR1      | 1.09 | 0.85 | 1.39 | 5.02E-01 | T | 0.07 | T | 0.25 |
| rs2287622  | ABCB11    | 0.93 | 0.75 | 1.15 | 5.02E-01 | T | 0.43 | T | 0.38 |
| rs1236913  | PTGS1     | 0.85 | 0.53 | 1.37 | 5.02E-01 | T | 0.01 | T | 0.07 |

|            |            |      |      |      |          |   |      |   |      |
|------------|------------|------|------|------|----------|---|------|---|------|
| rs1966265  | FGFR4      | 0.91 | 0.70 | 1.19 | 5.02E-01 | A | 0.06 | A | 0.23 |
| rs1800591  | MTPP       | 0.93 | 0.74 | 1.16 | 5.02E-01 | T | 0.31 | T | 0.26 |
| rs1520658  | DPYD       | 0.90 | 0.67 | 1.22 | 5.03E-01 | G | 0.04 | G | 0.15 |
| rs2228570  | VDR        | 1.08 | 0.87 | 1.33 | 5.03E-01 | T | 0.27 | T | 0.42 |
| rs7744392  | PPARD      | 0.87 | 0.57 | 1.31 | 5.04E-01 | G | 0.26 | G | 0.05 |
| rs405729   | GSTA4      | 1.07 | 0.87 | 1.32 | 5.04E-01 | G | 0.49 | A | 0.48 |
| rs3218651  | POLQ       | 1.09 | 0.84 | 1.42 | 5.04E-01 | G | 0.12 | G | 0.19 |
| rs2397118  | GSTA5      | 0.85 | 0.52 | 1.37 | 5.04E-01 | C | 0.16 | C | 0.04 |
| rs2076655  | FRAP1      | 0.92 | 0.72 | 1.17 | 5.04E-01 | A | 0.22 | G | 0.29 |
| rs713865   | CACNA1I    | 1.07 | 0.87 | 1.32 | 5.05E-01 | T | 0.17 | T | 0.46 |
| rs2012199  | FCRL5      | 0.90 | 0.66 | 1.22 | 5.05E-01 | C | 0.23 | C | 0.13 |
| rs2137680  | IGF1R      | 1.08 | 0.86 | 1.36 | 5.06E-01 | C | 0.37 | T | 0.30 |
| rs434473   | ALOX12     | 1.08 | 0.86 | 1.35 | 5.07E-01 | G | 0.23 | G | 0.42 |
| rs15922    | TAF11      | 1.18 | 0.73 | 1.91 | 5.07E-01 | G | 0.01 | G | 0.06 |
| rs397589   | CBS        | 1.07 | 0.87 | 1.33 | 5.07E-01 | G | 0.44 | T | 0.49 |
| rs7214723  | CAMKK1     | 1.07 | 0.87 | 1.32 | 5.07E-01 | C | 0.14 | C | 0.46 |
| rs734351   | IGF2       | 1.07 | 0.87 | 1.32 | 5.07E-01 | C | 0.27 | C | 0.41 |
| rs7011     | CINP       | 0.92 | 0.72 | 1.18 | 5.08E-01 | T | 0.11 | T | 0.27 |
| rs6162     | CYP17A1    | 1.07 | 0.87 | 1.33 | 5.08E-01 | A | 0.38 | A | 0.44 |
| rs2074113  | AHR        | 1.12 | 0.80 | 1.56 | 5.11E-01 | A | 0.16 | A | 0.10 |
| rs632478   | MMP3       | 0.93 | 0.75 | 1.15 | 5.11E-01 | A | 0.41 | C | 0.50 |
| rs1634499  | CCL3       | 0.92 | 0.71 | 1.19 | 5.11E-01 | G | 0.18 | G | 0.24 |
| rs2303428  | MSH2       | 0.89 | 0.63 | 1.26 | 5.11E-01 | C | 0.03 | C | 0.12 |
| rs2297518  | NOS2       | 1.10 | 0.83 | 1.45 | 5.12E-01 | A | 0.08 | A | 0.19 |
| rs10018288 | Intergenic | 1.09 | 0.85 | 1.40 | 5.12E-01 | G | 0.47 | G | 0.20 |
| rs2066827  | CDKN1B     | 1.09 | 0.84 | 1.43 | 5.12E-01 | T | 0.29 | G | 0.23 |
| rs462779   | REV3L      | 1.08 | 0.86 | 1.36 | 5.13E-01 | T | 0.45 | C | 0.23 |
| rs1061494  | TNC        | 0.93 | 0.75 | 1.15 | 5.14E-01 | T | 0.45 | C | 0.45 |
| rs487848   | POLQ       | 1.15 | 0.75 | 1.76 | 5.14E-01 | A | 0.17 | A | 0.06 |
| rs3181077  | CCR1       | 1.09 | 0.85 | 1.39 | 5.15E-01 | G | 0.07 | G | 0.25 |
| rs2230748  | CD97       | 0.91 | 0.68 | 1.21 | 5.15E-01 | A | 0.09 | A | 0.15 |
| rs6668589  | PHGDH      | 0.93 | 0.73 | 1.17 | 5.16E-01 | C | 0.34 | C | 0.29 |
| rs667565   | DPYD       | 1.07 | 0.87 | 1.31 | 5.16E-01 | G | 0.42 | G | 0.39 |
| rs279941   | SLC10A2    | 1.11 | 0.81 | 1.52 | 5.17E-01 | T | 0.09 | T | 0.13 |
| rs3746101  | MKNK2      | 0.86 | 0.55 | 1.35 | 5.18E-01 | T | 0.01 | T | 0.09 |
| rs2802269  | CDC42BPA   | 0.88 | 0.61 | 1.29 | 5.18E-01 | G | 0.09 | G | 0.09 |
| rs3020314  | ESR1       | 0.93 | 0.75 | 1.15 | 5.18E-01 | T | 0.33 | C | 0.36 |
| rs776741   | CYP3A5     | 1.14 | 0.76 | 1.72 | 5.19E-01 | C | 0.39 | C | 0.04 |
| rs2250889  | MMP9       | 1.13 | 0.77 | 1.66 | 5.20E-01 | G | 0.17 | G | 0.07 |
| rs1805313  | ALAD       | 1.07 | 0.87 | 1.33 | 5.20E-01 | C | 0.49 | C | 0.36 |
| rs2241228  | GPRC5A     | 0.93 | 0.74 | 1.16 | 5.21E-01 | G | 0.43 | A | 0.43 |
| rs941798   | PTPN1      | 1.07 | 0.87 | 1.33 | 5.21E-01 | G | 0.29 | G | 0.45 |
| rs2028373  | AICDA      | 1.08 | 0.86 | 1.34 | 5.21E-01 | A | 0.33 | G | 0.37 |
| rs3821107  | XRCC5      | 1.08 | 0.85 | 1.38 | 5.21E-01 | G | 0.41 | G | 0.24 |
| rs1805408  | PARP1      | 0.92 | 0.71 | 1.19 | 5.22E-01 | G | 0.39 | G | 0.19 |
| rs4760     | PLAUR      | 1.11 | 0.80 | 1.54 | 5.22E-01 | C | 0.02 | C | 0.14 |
| rs4341514  | IGF2       | 1.07 | 0.87 | 1.32 | 5.22E-01 | C | 0.29 | T | 0.36 |
| rs316003   | SLC22A2    | 0.92 | 0.72 | 1.18 | 5.22E-01 | T | 0.46 | C | 0.23 |
| rs7304504  | LRP1       | 0.84 | 0.50 | 1.43 | 5.23E-01 | A | 0.23 | A | 0.01 |
| rs8177877  | GCSH       | 0.78 | 0.36 | 1.69 | 5.23E-01 | G | 0.13 | G | 0.00 |

|            |         |      |      |      |          |   |      |   |      |
|------------|---------|------|------|------|----------|---|------|---|------|
| rs1049216  | CASP3   | 1.07 | 0.87 | 1.32 | 5.23E-01 | C | 0.23 | C | 0.31 |
| rs725349   | HGF     | 1.08 | 0.85 | 1.38 | 5.23E-01 | T | 0.46 | T | 0.19 |
| rs722921   | ALDH1A1 | 0.93 | 0.75 | 1.15 | 5.23E-01 | A | 0.17 | A | 0.49 |
| rs2272225  | SHFM1   | 1.14 | 0.76 | 1.71 | 5.23E-01 | A | 0.10 | A | 0.06 |
| rs3770     | ABCC4   | 0.93 | 0.75 | 1.15 | 5.25E-01 | A | 0.46 | A | 0.40 |
| rs664143   | ATM     | 1.07 | 0.87 | 1.32 | 5.25E-01 | T | 0.34 | T | 0.43 |
| rs3741883  | NUAK1   | 1.09 | 0.83 | 1.44 | 5.26E-01 | C | 0.08 | C | 0.22 |
| rs2269112  | BRPF1   | 1.10 | 0.82 | 1.46 | 5.26E-01 | T | 0.04 | T | 0.18 |
| rs6041759  | FKBP1A  | 0.89 | 0.63 | 1.27 | 5.26E-01 | C | 0.24 | C | 0.09 |
| rs6742078  | UGT1A1  | 1.08 | 0.85 | 1.36 | 5.27E-01 | T | 0.39 | T | 0.32 |
| rs1801278  | IRS1    | 1.15 | 0.75 | 1.76 | 5.27E-01 | A | 0.05 | A | 0.06 |
| rs9282626  | CAT     | 1.16 | 0.74 | 1.82 | 5.27E-01 | C | 0.07 | C | 0.04 |
| rs1870049  | CYP19A1 | 0.91 | 0.67 | 1.23 | 5.27E-01 | C | 0.40 | C | 0.12 |
| rs1801105  |         | 0.89 | 0.61 | 1.29 | 5.27E-01 | T | 0.01 | T | 0.11 |
| rs9282616  | BLM     | 0.86 | 0.55 | 1.36 | 5.28E-01 | G | 0.20 | G | 0.03 |
| rs2237060  | RAD50   | 0.93 | 0.73 | 1.17 | 5.28E-01 | C | 0.07 | C | 0.40 |
| rs2228529  | ERCC6   | 0.92 | 0.70 | 1.20 | 5.28E-01 | G | 0.11 | G | 0.21 |
| rs2243290  | IL4     | 1.09 | 0.84 | 1.40 | 5.28E-01 | A | 0.32 | A | 0.18 |
| rs419129   | GSTA4   | 1.07 | 0.87 | 1.32 | 5.29E-01 | G | 0.46 | T | 0.48 |
| rs1041981  | LTA     | 0.93 | 0.74 | 1.17 | 5.29E-01 | A | 0.42 | A | 0.37 |
| rs552976   | ABCB11  | 0.93 | 0.75 | 1.16 | 5.30E-01 | T | 0.40 | T | 0.32 |
| rs4149056  | SLCO1B1 | 1.10 | 0.82 | 1.47 | 5.31E-01 | C | 0.04 | C | 0.15 |
| rs4148221  | ABCG8   | 1.09 | 0.83 | 1.44 | 5.31E-01 | T | 0.20 | T | 0.16 |
| rs13027171 | MERTK   | 0.92 | 0.72 | 1.19 | 5.31E-01 | A | 0.07 | A | 0.29 |
| rs2165810  | MBL2    | 1.08 | 0.85 | 1.35 | 5.32E-01 | T | 0.45 | A | 0.21 |
| rs694564   | ALDH1A1 | 1.15 | 0.74 | 1.81 | 5.33E-01 | A | 0.14 | A | 0.03 |
| rs3176878  | VCAM1   | 0.91 | 0.67 | 1.23 | 5.33E-01 | T | 0.16 | T | 0.16 |
| rs234706   | CBS     | 0.92 | 0.70 | 1.20 | 5.33E-01 | A | 0.22 | A | 0.34 |
| rs923796   | NAT2    | 0.94 | 0.76 | 1.16 | 5.34E-01 | G | 0.21 | G | 0.40 |
| rs2242664  | SLC44A4 | 1.07 | 0.86 | 1.33 | 5.34E-01 | G | 0.35 | G | 0.46 |
| rs2069391  | CDK2    | 1.12 | 0.78 | 1.63 | 5.34E-01 | T | 0.11 | T | 0.07 |
| rs8190315  | BID     | 1.21 | 0.66 | 2.22 | 5.34E-01 | G | 0.06 | G | 0.02 |
| rs2305801  | CYP4F11 | 0.92 | 0.72 | 1.19 | 5.34E-01 | A | 0.40 | A | 0.19 |
| rs2515363  | CNTF    | 0.93 | 0.75 | 1.16 | 5.34E-01 | G | 0.36 | C | 0.41 |
| rs2137975  | DPYD    | 0.93 | 0.74 | 1.17 | 5.35E-01 | C | 0.36 | C | 0.31 |
| rs854556   | PON1    | 1.08 | 0.85 | 1.37 | 5.35E-01 | T | 0.20 | T | 0.32 |
| rs4820889  | TCN2    | 0.83 | 0.46 | 1.51 | 5.36E-01 | A | 0.10 | A | 0.03 |
| rs11848612 | ADSSL1  | 0.93 | 0.75 | 1.16 | 5.36E-01 | C | 0.46 | G | 0.45 |
| rs527221   | DMPK    | 1.11 | 0.80 | 1.55 | 5.36E-01 | C | 0.07 | C | 0.12 |
| rs1043424  | PINK1   | 0.93 | 0.73 | 1.18 | 5.36E-01 | C | 0.31 | C | 0.27 |
| rs3748433  | CEP250  | 0.89 | 0.61 | 1.29 | 5.36E-01 | T | 0.18 | T | 0.08 |
| rs6030     | F5      | 1.07 | 0.86 | 1.35 | 5.37E-01 | G | 0.18 | G | 0.33 |
| rs3177980  | SELL    | 0.92 | 0.72 | 1.19 | 5.37E-01 | C | 0.14 | C | 0.24 |
| rs7746988  | PPARD   | 0.86 | 0.53 | 1.39 | 5.38E-01 | C | 0.31 | C | 0.02 |
| rs1801516  | ATM     | 0.91 | 0.66 | 1.24 | 5.38E-01 | A | 0.03 | A | 0.13 |
| rs4918758  | CYP2C9  | 0.93 | 0.74 | 1.17 | 5.39E-01 | C | 0.33 | C | 0.34 |
| rs1946519  | IL18    | 1.07 | 0.86 | 1.33 | 5.40E-01 | A | 0.35 | A | 0.41 |
| rs6056     | FGB     | 1.09 | 0.83 | 1.43 | 5.40E-01 | T | 0.08 | T | 0.18 |
| rs2303929  | SLC4A2  | 0.93 | 0.73 | 1.18 | 5.40E-01 | A | 0.13 | A | 0.25 |
| rs742350   | FMO1    | 0.91 | 0.68 | 1.22 | 5.41E-01 | A | 0.47 | A | 0.12 |

|            |          |      |      |      |          |   |      |   |      |
|------------|----------|------|------|------|----------|---|------|---|------|
| rs7803574  | SHFM1    | 1.14 | 0.76 | 1.70 | 5.41E-01 | T | 0.10 | T | 0.06 |
| rs549908   | IL18     | 1.07 | 0.86 | 1.34 | 5.41E-01 | G | 0.20 | G | 0.31 |
| rs3738136  | PINK1    | 0.85 | 0.52 | 1.42 | 5.41E-01 | A | 0.03 | A | 0.07 |
| rs2287620  | ABCB11   | 0.93 | 0.75 | 1.16 | 5.41E-01 | A | 0.26 | A | 0.43 |
| rs13436    | LIG1     | 0.93 | 0.74 | 1.17 | 5.41E-01 | G | 0.47 | C | 0.42 |
| rs3813867  | CYP2E1   | 0.85 | 0.51 | 1.42 | 5.41E-01 | C | 0.07 | C | 0.04 |
| rs664982   | ATM      | 1.07 | 0.87 | 1.31 | 5.42E-01 | A | 0.41 | G | 0.44 |
| rs2640     | EIF2AK1  | 0.87 | 0.55 | 1.37 | 5.42E-01 | C | 0.02 | C | 0.07 |
| rs801720   | CERK     | 0.93 | 0.75 | 1.16 | 5.43E-01 | G | 0.31 | T | 0.40 |
| rs3736265  | PPARGC1A | 0.86 | 0.54 | 1.38 | 5.44E-01 | A | 0.07 | A | 0.06 |
| rs2072671  | CDA      | 0.93 | 0.74 | 1.18 | 5.44E-01 | C | 0.08 | C | 0.33 |
| rs2214827  | HGF      | 1.08 | 0.84 | 1.39 | 5.44E-01 | G | 0.06 | G | 0.22 |
| rs3752988  | CYP2C8   | 1.07 | 0.86 | 1.34 | 5.44E-01 | C | 0.46 | C | 0.30 |
| rs5320     | DBH      | 0.88 | 0.57 | 1.35 | 5.44E-01 | A | 0.17 | A | 0.06 |
| rs1049897  | MGP      | 1.07 | 0.86 | 1.32 | 5.45E-01 | T | 0.37 | T | 0.37 |
| rs667126   | LRP5     | 1.07 | 0.85 | 1.35 | 5.45E-01 | T | 0.48 | C | 0.25 |
| rs1760212  | DPYD     | 0.93 | 0.75 | 1.17 | 5.45E-01 | T | 0.43 | T | 0.38 |
| rs1514497  | DPYD     | 1.07 | 0.85 | 1.35 | 5.45E-01 | T | 0.45 | T | 0.27 |
| rs2509915  | CNTF     | 0.93 | 0.75 | 1.17 | 5.45E-01 | A | 0.35 | G | 0.41 |
| rs1805407  | PARP1    | 0.92 | 0.71 | 1.20 | 5.46E-01 | G | 0.39 | G | 0.19 |
| rs17773251 | CSNK1A1L | 1.11 | 0.79 | 1.57 | 5.46E-01 | G | 0.07 | G | 0.09 |
| rs673      | TNF      | 0.65 | 0.16 | 2.66 | 5.46E-01 | A | 0.06 | A | 0.00 |
| rs3212218  | IL12B    | 0.92 | 0.69 | 1.22 | 5.47E-01 | T | 0.31 | T | 0.24 |
| rs6902123  | PPARD    | 0.90 | 0.63 | 1.28 | 5.47E-01 | T | 0.37 | C | 0.07 |
| rs2979895  | POLB     | 0.90 | 0.65 | 1.25 | 5.48E-01 | T | 0.36 | C | 0.08 |
| rs1014136  | STARD3NL | 1.08 | 0.84 | 1.37 | 5.48E-01 | C | 0.21 | C | 0.24 |
| rs2269429  | TNXB     | 0.89 | 0.61 | 1.30 | 5.49E-01 | A | 0.18 | A | 0.08 |
| rs4251710  | TAF15    | 1.11 | 0.78 | 1.59 | 5.49E-01 | C | 0.33 | C | 0.07 |
| rs11571117 | REN      | 0.65 | 0.15 | 2.70 | 5.49E-01 | A | 0.06 | O | 0.00 |
| rs447804   | BLM      | 0.93 | 0.73 | 1.18 | 5.50E-01 | C | 0.40 | C | 0.33 |
| rs858521   | SAT2     | 1.07 | 0.86 | 1.34 | 5.50E-01 | G | 0.12 | G | 0.37 |
| rs1567868  | IL8RA    | 0.89 | 0.61 | 1.30 | 5.50E-01 | C | 0.23 | C | 0.06 |
| rs2299257  | PON1     | 0.94 | 0.76 | 1.16 | 5.50E-01 | A | 0.43 | C | 0.44 |
| rs4765181  | SCARB1   | 1.07 | 0.85 | 1.35 | 5.51E-01 | A | 0.27 | A | 0.38 |
| rs3181078  | CCR1     | 0.88 | 0.57 | 1.36 | 5.51E-01 | G | 0.02 | G | 0.08 |
| rs2288648  | FASTK    | 0.75 | 0.30 | 1.91 | 5.52E-01 | A | 0.06 | A | 0.01 |
| rs663530   | MRE11A   | 1.08 | 0.85 | 1.37 | 5.52E-01 | T | 0.16 | T | 0.27 |
| rs581002   | MRE11A   | 1.07 | 0.85 | 1.36 | 5.52E-01 | T | 0.17 | T | 0.26 |
| rs4443426  | MGC42105 | 0.94 | 0.76 | 1.16 | 5.53E-01 | C | 0.43 | C | 0.48 |
| rs3850997  | TNFRSF17 | 1.08 | 0.84 | 1.37 | 5.54E-01 | T | 0.11 | T | 0.34 |
| rs2292954  | SPG7     | 0.91 | 0.67 | 1.24 | 5.54E-01 | C | 0.06 | C | 0.18 |
| rs617219   | BHMT     | 1.07 | 0.86 | 1.33 | 5.54E-01 | C | 0.30 | C | 0.36 |
| rs348458   | ALDH1A1  | 1.06 | 0.87 | 1.30 | 5.55E-01 | A | 0.47 | A | 0.47 |
| rs3091336  | IL3      | 1.16 | 0.71 | 1.91 | 5.56E-01 | A | 0.31 | A | 0.01 |
| rs8187758  | SLC28A1  | 1.08 | 0.84 | 1.38 | 5.56E-01 | A | 0.19 | A | 0.24 |
| rs230547   | NFKB1    | 0.90 | 0.62 | 1.29 | 5.56E-01 | T | 0.15 | T | 0.09 |
| rs299284   | HMMR     | 0.90 | 0.65 | 1.27 | 5.57E-01 | T | 0.11 | T | 0.12 |
| rs1866928  | C15orf42 | 1.07 | 0.85 | 1.35 | 5.57E-01 | A | 0.41 | A | 0.35 |
| rs2270628  | IGFBP3   | 1.08 | 0.84 | 1.38 | 5.57E-01 | T | 0.38 | T | 0.20 |
| rs6092     | SERPINE1 | 0.89 | 0.60 | 1.31 | 5.57E-01 | A | 0.02 | A | 0.10 |

|            |              |      |      |      |          |   |      |   |      |
|------------|--------------|------|------|------|----------|---|------|---|------|
| rs2899472  | CYP19A1      | 0.92 | 0.71 | 1.21 | 5.58E-01 | A | 0.05 | A | 0.24 |
| rs741817   | CYP8B1       | 1.26 | 0.58 | 2.71 | 5.58E-01 | T | 0.07 | T | 0.00 |
| rs10775648 | HUNK         | 0.92 | 0.70 | 1.21 | 5.59E-01 | T | 0.08 | T | 0.23 |
| rs2813545  | ESR1         | 1.07 | 0.85 | 1.36 | 5.59E-01 | C | 0.27 | C | 0.22 |
| rs348449   | ALDH1A1      | 1.14 | 0.74 | 1.76 | 5.60E-01 | C | 0.13 | C | 0.03 |
| rs1052248  | LST1         | 1.07 | 0.85 | 1.36 | 5.60E-01 | A | 0.23 | A | 0.25 |
| rs3547     | XRCC1        | 1.07 | 0.86 | 1.32 | 5.60E-01 | T | 0.34 | T | 0.42 |
| rs5743553  | TLR1         | 0.84 | 0.47 | 1.51 | 5.61E-01 | A | 0.16 | A | 0.01 |
| rs28899170 | UGT1A10      | 1.07 | 0.85 | 1.35 | 5.61E-01 | A | 0.27 | A | 0.28 |
| rs2243268  | IL4          | 1.08 | 0.83 | 1.40 | 5.62E-01 | C | 0.24 | C | 0.18 |
| rs7393105  | ABCC2        | 1.07 | 0.86 | 1.33 | 5.63E-01 | C | 0.42 | C | 0.43 |
| rs2066853  | AHR          | 1.09 | 0.81 | 1.48 | 5.63E-01 | A | 0.43 | A | 0.11 |
| rs2297345  | PAK7         | 1.07 | 0.85 | 1.34 | 5.63E-01 | C | 0.18 | T | 0.30 |
| rs743616   | ARSA         | 0.94 | 0.77 | 1.15 | 5.63E-01 | C | 0.44 | G | 0.47 |
| rs6005     | F5           | 0.72 | 0.24 | 2.16 | 5.63E-01 | G | 0.08 | O | 0.00 |
| rs2279103  | CTDP1        | 1.08 | 0.83 | 1.42 | 5.63E-01 | T | 0.05 | T | 0.17 |
| rs207910   | XRCC5        | 1.09 | 0.81 | 1.47 | 5.63E-01 | G | 0.22 | G | 0.13 |
| rs196912   | ERN1         | 1.07 | 0.85 | 1.36 | 5.64E-01 | C | 0.34 | T | 0.23 |
| rs1800457  | CYB5R3       | 1.19 | 0.65 | 2.19 | 5.66E-01 | G | 0.27 | G | 0.00 |
| rs1126579  | IL8RB        | 1.07 | 0.85 | 1.33 | 5.66E-01 | T | 0.18 | T | 0.46 |
| rs2302465  | BST1         | 0.91 | 0.64 | 1.27 | 5.67E-01 | T | 0.01 | T | 0.12 |
| rs4148211  | ABCG8        | 0.94 | 0.74 | 1.18 | 5.67E-01 | G | 0.19 | G | 0.40 |
| rs11466155 | NGFR         | 1.07 | 0.85 | 1.34 | 5.67E-01 | T | 0.08 | T | 0.33 |
| rs1260326  | GCKR         | 1.07 | 0.85 | 1.36 | 5.67E-01 | T | 0.16 | T | 0.38 |
| rs1202170  | ABCB1        | 1.07 | 0.86 | 1.32 | 5.68E-01 | G | 0.48 | G | 0.49 |
| rs491347   | LRP5         | 1.07 | 0.85 | 1.34 | 5.68E-01 | T | 0.46 | C | 0.25 |
| rs2302538  | UGT1A1       | 1.09 | 0.81 | 1.45 | 5.69E-01 | G | 0.33 | G | 0.13 |
| rs1294689  | FKBP1A       | 1.07 | 0.85 | 1.35 | 5.69E-01 | C | 0.18 | C | 0.31 |
| rs8187755  | SLC28A1      | 1.26 | 0.57 | 2.78 | 5.71E-01 | T | 0.08 | T | 0.00 |
| rs10018199 | SPOCK3       | 1.07 | 0.85 | 1.35 | 5.71E-01 | G | 0.33 | G | 0.25 |
| rs8192719  | CYP2B6       | 1.07 | 0.84 | 1.36 | 5.71E-01 | T | 0.39 | T | 0.27 |
| rs907806   | IGF1R        | 1.09 | 0.81 | 1.47 | 5.72E-01 | G | 0.25 | G | 0.13 |
| rs2269829  | PON1         | 1.07 | 0.85 | 1.33 | 5.72E-01 | A | 0.47 | G | 0.32 |
| rs11804091 | LEPR         | 1.09 | 0.81 | 1.46 | 5.73E-01 | G | 0.16 | G | 0.15 |
| rs1051137  | GSTM4        | 0.93 | 0.73 | 1.19 | 5.73E-01 | T | 0.16 | T | 0.35 |
| rs1801058  | GRK4         | 0.94 | 0.75 | 1.17 | 5.73E-01 | T | 0.16 | T | 0.42 |
| rs162549   | CYP1B1       | 0.92 | 0.70 | 1.21 | 5.73E-01 | T | 0.19 | T | 0.20 |
| rs9935059  | EEF2K        | 1.10 | 0.80 | 1.51 | 5.73E-01 | G | 0.29 | G | 0.09 |
| rs3116496  | CD28         | 0.92 | 0.68 | 1.24 | 5.74E-01 | C | 0.06 | C | 0.18 |
| rs274558   | SLC22A5      | 0.94 | 0.74 | 1.18 | 5.74E-01 | C | 0.39 | C | 0.43 |
| rs4681     | FGB          | 1.08 | 0.82 | 1.44 | 5.74E-01 | T | 0.03 | T | 0.17 |
| rs6886047  | GHR          | 0.94 | 0.74 | 1.18 | 5.75E-01 | T | 0.45 | T | 0.25 |
| rs3748415  | APCDD1       | 0.91 | 0.64 | 1.28 | 5.76E-01 | T | 0.01 | T | 0.12 |
| rs2230590  | MST1R        | 0.94 | 0.75 | 1.18 | 5.76E-01 | A | 0.33 | G | 0.49 |
| rs3793345  | IGFBP3       | 0.92 | 0.70 | 1.22 | 5.76E-01 | C | 0.20 | C | 0.19 |
| rs1709409  | DPYD         | 1.07 | 0.84 | 1.38 | 5.77E-01 | G | 0.22 | G | 0.23 |
| rs1866389  | LOC100129870 | 1.08 | 0.83 | 1.40 | 5.77E-01 | G | 0.09 | G | 0.22 |
| rs3749228  | CHRD         | 1.12 | 0.75 | 1.68 | 5.77E-01 | G | 0.12 | G | 0.06 |
| rs2039449  | DPYD         | 1.07 | 0.85 | 1.35 | 5.78E-01 | C | 0.45 | C | 0.26 |
| rs6508     | WIT1         | 1.10 | 0.79 | 1.52 | 5.79E-01 | A | 0.36 | A | 0.07 |

|            |          |      |      |      |          |   |      |   |      |
|------------|----------|------|------|------|----------|---|------|---|------|
| rs2071520  | TNC      | 1.07 | 0.85 | 1.34 | 5.79E-01 | C | 0.26 | C | 0.33 |
| rs1801133  | MTHFR    | 0.94 | 0.74 | 1.19 | 5.79E-01 | T | 0.12 | T | 0.32 |
| rs7218866  | PSMB6    | 0.84 | 0.46 | 1.55 | 5.79E-01 | T | 0.05 | T | 0.03 |
| rs3218222  | CDKN2D   | 1.07 | 0.84 | 1.36 | 5.80E-01 | A | 0.25 | A | 0.27 |
| rs2236379  | PRKCQ    | 1.07 | 0.84 | 1.37 | 5.80E-01 | T | 0.34 | T | 0.25 |
| rs376618   | FGFR4    | 1.07 | 0.84 | 1.36 | 5.80E-01 | G | 0.34 | G | 0.23 |
| rs1805061  | SLC7A7   | 1.08 | 0.83 | 1.41 | 5.80E-01 | C | 0.22 | C | 0.15 |
| rs17006837 | HELQ     | 1.17 | 0.67 | 2.04 | 5.80E-01 | G | 0.48 | G | 0.00 |
| rs496550   | ABCB11   | 0.94 | 0.76 | 1.16 | 5.81E-01 | G | 0.30 | A | 0.45 |
| rs1060896  | SLC28A2  | 1.06 | 0.85 | 1.32 | 5.81E-01 | A | 0.17 | C | 0.38 |
| rs2706338  | RAD50    | 1.08 | 0.83 | 1.40 | 5.81E-01 | T | 0.05 | T | 0.20 |
| rs7736656  | UBLCP1   | 1.08 | 0.82 | 1.42 | 5.82E-01 | A | 0.18 | A | 0.18 |
| rs4983543  | ADSSL1   | 0.94 | 0.76 | 1.17 | 5.83E-01 | T | 0.12 | C | 0.47 |
| rs2235937  | PTPRU    | 0.94 | 0.74 | 1.18 | 5.83E-01 | G | 0.20 | G | 0.26 |
| rs3756772  | FRK      | 1.06 | 0.86 | 1.32 | 5.83E-01 | A | 0.23 | A | 0.44 |
| rs769412   | MDM2     | 1.13 | 0.73 | 1.75 | 5.84E-01 | G | 0.12 | G | 0.05 |
| rs26279    | MSH3     | 0.94 | 0.75 | 1.18 | 5.84E-01 | G | 0.33 | G | 0.29 |
| rs2522390  | RAD50    | 0.76 | 0.29 | 2.02 | 5.86E-01 | C | 0.10 | 0 | 0.00 |
| rs16913653 | IKBKAP   | 1.22 | 0.60 | 2.50 | 5.86E-01 | T | 0.12 | 0 | 0.00 |
| rs2706375  | RAD50    | 0.76 | 0.29 | 2.02 | 5.86E-01 | C | 0.10 | 0 | 0.00 |
| rs2260863  | EPHX1    | 1.06 | 0.85 | 1.33 | 5.87E-01 | G | 0.43 | G | 0.27 |
| rs10261833 | SHFM1    | 1.08 | 0.82 | 1.42 | 5.87E-01 | C | 0.16 | C | 0.18 |
| rs3942589  | SHFM1    | 0.90 | 0.61 | 1.33 | 5.88E-01 | G | 0.14 | G | 0.07 |
| rs1805411  | PARP1    | 1.08 | 0.82 | 1.42 | 5.89E-01 | A | 0.11 | A | 0.19 |
| rs2228059  | IL15RA   | 1.06 | 0.86 | 1.30 | 5.89E-01 | A | 0.32 | C | 0.49 |
| rs3745202  | PRX      | 0.92 | 0.67 | 1.26 | 5.90E-01 | C | 0.02 | C | 0.18 |
| rs8252     | GADD45G  | 0.88 | 0.54 | 1.42 | 5.90E-01 | A | 0.10 | A | 0.03 |
| rs3811635  | MERTK    | 1.06 | 0.86 | 1.31 | 5.90E-01 | A | 0.36 | A | 0.40 |
| rs4148950  | CHST3    | 1.06 | 0.86 | 1.30 | 5.90E-01 | A | 0.29 | A | 0.46 |
| rs3793771  | WNT8B    | 1.07 | 0.83 | 1.38 | 5.90E-01 | G | 0.21 | G | 0.22 |
| rs4938016  | ANKK1    | 1.06 | 0.85 | 1.32 | 5.91E-01 | C | 0.47 | G | 0.34 |
| rs188096   | SLC10A2  | 1.09 | 0.79 | 1.50 | 5.91E-01 | A | 0.08 | A | 0.13 |
| rs664393   | FLT1     | 1.10 | 0.78 | 1.53 | 5.91E-01 | A | 0.05 | A | 0.12 |
| rs11574138 | VDR      | 0.73 | 0.23 | 2.32 | 5.91E-01 | G | 0.09 | G | 0.00 |
| rs5888     | SCARB1   | 0.94 | 0.76 | 1.17 | 5.92E-01 | T | 0.21 | T | 0.46 |
| rs2020863  | FMO2     | 1.09 | 0.79 | 1.52 | 5.93E-01 | G | 0.06 | G | 0.10 |
| rs2296869  | SETX     | 1.07 | 0.84 | 1.37 | 5.93E-01 | A | 0.36 | G | 0.18 |
| rs5896     | F2       | 1.09 | 0.80 | 1.48 | 5.94E-01 | T | 0.04 | T | 0.16 |
| rs4645878  | BAX      | 1.09 | 0.79 | 1.52 | 5.94E-01 | A | 0.10 | A | 0.11 |
| rs2522393  | RAD50    | 0.85 | 0.46 | 1.55 | 5.94E-01 | T | 0.25 | T | 0.01 |
| rs2706369  | RAD50    | 0.85 | 0.46 | 1.55 | 5.94E-01 | T | 0.25 | T | 0.01 |
| rs4529     | TBXAS1   | 1.24 | 0.56 | 2.71 | 5.94E-01 | G | 0.10 | G | 0.00 |
| rs2297881  | KIF1B    | 1.16 | 0.67 | 2.01 | 5.94E-01 | C | 0.06 | C | 0.03 |
| rs1549760  | CDK5     | 0.94 | 0.74 | 1.19 | 5.94E-01 | T | 0.29 | T | 0.25 |
| rs2295275  | TRERF1   | 0.88 | 0.55 | 1.40 | 5.95E-01 | A | 0.01 | A | 0.07 |
| rs16975750 | LIPE     | 1.19 | 0.63 | 2.27 | 5.95E-01 | G | 0.21 | G | 0.00 |
| rs2040968  | HGF      | 1.07 | 0.84 | 1.35 | 5.95E-01 | C | 0.34 | C | 0.22 |
| rs1148459  | TNFRSF1B | 1.06 | 0.86 | 1.30 | 5.95E-01 | C | 0.41 | A | 0.47 |
| rs943584   | PLEKHG5  | 1.11 | 0.76 | 1.61 | 5.96E-01 | T | 0.22 | T | 0.08 |
| rs1189466  | ABCC4    | 0.89 | 0.57 | 1.38 | 5.96E-01 | A | 0.12 | A | 0.06 |

|            |          |      |      |      |          |   |      |   |      |
|------------|----------|------|------|------|----------|---|------|---|------|
| rs2228001  | XPC      | 1.06 | 0.85 | 1.32 | 5.96E-01 | C | 0.26 | C | 0.39 |
| rs35595    | ABCC1    | 1.07 | 0.83 | 1.40 | 5.96E-01 | A | 0.46 | A | 0.14 |
| rs1063169  | FOS      | 0.91 | 0.65 | 1.29 | 5.96E-01 | T | 0.04 | T | 0.16 |
| rs2228262  | THBS1    | 1.09 | 0.79 | 1.52 | 5.97E-01 | G | 0.02 | G | 0.11 |
| rs6874941  | CART     | 0.93 | 0.71 | 1.22 | 5.97E-01 | C | 0.45 | C | 0.15 |
| rs2287395  | GSTZ1    | 0.94 | 0.75 | 1.18 | 5.97E-01 | G | 0.28 | G | 0.30 |
| rs40228    | TPK1     | 1.08 | 0.82 | 1.41 | 5.97E-01 | T | 0.38 | T | 0.17 |
| rs323870   | PARP3    | 1.19 | 0.62 | 2.30 | 5.97E-01 | G | 0.14 | G | 0.00 |
| rs3024680  | IL4R     | 0.86 | 0.50 | 1.49 | 5.97E-01 | C | 0.24 | C | 0.01 |
| rs6003     | F13B     | 1.08 | 0.80 | 1.46 | 5.97E-01 | A | 0.42 | G | 0.09 |
| rs10018618 | C1QTNF7  | 1.18 | 0.64 | 2.17 | 5.97E-01 | C | 0.26 | C | 0.00 |
| rs1822017  | DCBLD2   | 1.08 | 0.81 | 1.45 | 5.98E-01 | T | 0.19 | T | 0.15 |
| rs7663494  | DCTD     | 1.06 | 0.85 | 1.32 | 5.99E-01 | A | 0.49 | G | 0.29 |
| rs1060253  | SLC7A5   | 0.94 | 0.75 | 1.18 | 5.99E-01 | G | 0.13 | G | 0.28 |
| rs1341160  | CYP2C8   | 1.09 | 0.79 | 1.50 | 5.99E-01 | A | 0.04 | A | 0.13 |
| rs1532268  | MTRR     | 1.06 | 0.85 | 1.32 | 5.99E-01 | A | 0.29 | A | 0.35 |
| rs2230365  | NFKBIL1  | 0.92 | 0.68 | 1.25 | 6.00E-01 | T | 0.07 | T | 0.15 |
| rs514658   | TATDN2   | 1.06 | 0.84 | 1.34 | 6.00E-01 | T | 0.36 | T | 0.24 |
| rs560096   | IGHMBP2  | 0.93 | 0.71 | 1.22 | 6.01E-01 | T | 0.36 | T | 0.17 |
| rs1801701  | APOB     | 1.11 | 0.75 | 1.64 | 6.01E-01 | A | 0.03 | A | 0.09 |
| rs17680881 | TACC3    | 0.94 | 0.73 | 1.20 | 6.01E-01 | A | 0.15 | A | 0.26 |
| rs17162549 | MAP3K6   | 1.13 | 0.72 | 1.78 | 6.01E-01 | G | 0.23 | G | 0.03 |
| rs316019   | SLC22A2  | 0.91 | 0.64 | 1.30 | 6.01E-01 | T | 0.16 | T | 0.11 |
| rs10264952 | STK31    | 1.08 | 0.80 | 1.46 | 6.01E-01 | A | 0.10 | A | 0.17 |
| rs7120118  | NR1H3    | 1.06 | 0.85 | 1.33 | 6.02E-01 | C | 0.42 | C | 0.31 |
| rs8034835  | CYP19A1  | 1.06 | 0.85 | 1.32 | 6.02E-01 | G | 0.23 | A | 0.48 |
| rs731027   | CHST3    | 1.06 | 0.86 | 1.30 | 6.03E-01 | C | 0.43 | C | 0.47 |
| rs1800738  | TPP1     | 0.94 | 0.76 | 1.17 | 6.03E-01 | A | 0.25 | T | 0.41 |
| rs2274406  | ABCC4    | 0.94 | 0.76 | 1.17 | 6.04E-01 | C | 0.38 | T | 0.35 |
| rs4809957  | CYP24A1  | 1.07 | 0.83 | 1.36 | 6.04E-01 | G | 0.42 | G | 0.23 |
| rs2270132  | BLM      | 0.94 | 0.76 | 1.18 | 6.04E-01 | G | 0.13 | G | 0.44 |
| rs2032349  | ADH4     | 1.15 | 0.67 | 1.97 | 6.04E-01 | T | 0.07 | T | 0.03 |
| rs1469167  | ALDH1A1  | 1.10 | 0.76 | 1.60 | 6.04E-01 | G | 0.27 | G | 0.05 |
| rs9606756  | TCN2     | 1.08 | 0.81 | 1.45 | 6.06E-01 | G | 0.16 | G | 0.12 |
| rs4724445  | IGFBP1   | 1.08 | 0.81 | 1.44 | 6.06E-01 | A | 0.09 | A | 0.18 |
| rs1938484  | LEPR     | 1.07 | 0.83 | 1.39 | 6.06E-01 | A | 0.17 | A | 0.21 |
| rs10743597 | A2M      | 0.95 | 0.76 | 1.17 | 6.06E-01 | G | 0.34 | G | 0.33 |
| rs689453   | NQO1     | 0.90 | 0.60 | 1.35 | 6.07E-01 | A | 0.04 | A | 0.08 |
| rs35766    | IGF1     | 0.93 | 0.71 | 1.22 | 6.07E-01 | A | 0.45 | G | 0.18 |
| rs4149965  | EXO1     | 1.07 | 0.83 | 1.38 | 6.07E-01 | A | 0.05 | A | 0.23 |
| rs529948   | NFKBIE   | 1.09 | 0.79 | 1.49 | 6.08E-01 | A | 0.03 | A | 0.14 |
| rs952005   | SHFM1    | 0.90 | 0.62 | 1.33 | 6.08E-01 | T | 0.14 | T | 0.07 |
| rs373496   | TNFRSF17 | 0.83 | 0.40 | 1.71 | 6.08E-01 | T | 0.08 | T | 0.01 |
| rs11401    | CCDC101  | 0.93 | 0.69 | 1.24 | 6.09E-01 | C | 0.17 | C | 0.18 |
| rs1181795  | PPARG    | 0.90 | 0.59 | 1.36 | 6.09E-01 | T | 0.02 | T | 0.08 |
| rs35594    | ABCC1    | 0.94 | 0.75 | 1.19 | 6.10E-01 | G | 0.33 | A | 0.28 |
| rs8187694  |          | 1.12 | 0.72 | 1.76 | 6.10E-01 | A | 0.05 | A | 0.05 |
| rs10409482 | VRK3     | 1.18 | 0.63 | 2.21 | 6.11E-01 | T | 0.16 | T | 0.00 |
| rs6644     | ADSSL1   | 0.95 | 0.76 | 1.17 | 6.11E-01 | T | 0.12 | C | 0.47 |
| rs1249958  | PPP1R1A  | 1.33 | 0.44 | 4.06 | 6.11E-01 | T | 0.07 | T | 0.00 |

|            |          |      |      |      |          |   |      |   |      |
|------------|----------|------|------|------|----------|---|------|---|------|
| rs216867   | VWF      | 1.08 | 0.79 | 1.48 | 6.12E-01 | A | 0.26 | A | 0.12 |
| rs2307145  | IL12RB2  | 0.88 | 0.52 | 1.46 | 6.12E-01 | C | 0.08 | C | 0.04 |
| rs5987     | F13A1    | 0.87 | 0.51 | 1.48 | 6.12E-01 | A | 0.03 | A | 0.05 |
| rs714629   | AICDA    | 0.95 | 0.77 | 1.17 | 6.12E-01 | G | 0.39 | C | 0.48 |
| rs3774936  | NFKB1    | 1.06 | 0.84 | 1.35 | 6.13E-01 | T | 0.07 | T | 0.33 |
| rs7903344  | CHUK     | 1.06 | 0.85 | 1.31 | 6.13E-01 | C | 0.25 | C | 0.50 |
| rs3923647  | TLR1     | 0.86 | 0.48 | 1.55 | 6.14E-01 | T | 0.08 | T | 0.03 |
| rs4674258  | IL8RB    | 0.95 | 0.77 | 1.17 | 6.14E-01 | C | 0.46 | T | 0.47 |
| rs165974   | ABCC1    | 0.92 | 0.68 | 1.26 | 6.15E-01 | T | 0.09 | T | 0.16 |
| rs887241   | ALDH3A1  | 0.94 | 0.75 | 1.18 | 6.15E-01 | T | 0.34 | T | 0.33 |
| rs2107538  | CCL5     | 0.93 | 0.72 | 1.22 | 6.16E-01 | T | 0.38 | T | 0.19 |
| rs5993883  | COMT     | 0.95 | 0.77 | 1.17 | 6.17E-01 | G | 0.42 | G | 0.50 |
| rs1805404  | PARP1    | 1.07 | 0.81 | 1.42 | 6.17E-01 | T | 0.12 | T | 0.18 |
| rs4371387  | APOB     | 0.93 | 0.71 | 1.22 | 6.18E-01 | A | 0.13 | A | 0.19 |
| rs17197552 | PPP2R3A  | 0.94 | 0.75 | 1.19 | 6.18E-01 | G | 0.19 | G | 0.28 |
| rs1341164  | CYP2C8   | 0.94 | 0.74 | 1.20 | 6.18E-01 | C | 0.29 | C | 0.28 |
| rs2249317  | SIRPD    | 1.07 | 0.82 | 1.41 | 6.19E-01 | T | 0.10 | T | 0.17 |
| rs5742659  | IGF1     | 0.78 | 0.30 | 2.07 | 6.19E-01 | C | 0.12 | C | 0.00 |
| rs1061472  | ATP7B    | 1.05 | 0.86 | 1.29 | 6.19E-01 | A | 0.49 | A | 0.43 |
| rs2641806  | CHST5    | 1.06 | 0.85 | 1.32 | 6.20E-01 | T | 0.29 | C | 0.34 |
| rs1801200  | ERBB2    | 0.94 | 0.72 | 1.21 | 6.20E-01 | G | 0.06 | G | 0.25 |
| rs25487    | XRCC1    | 1.06 | 0.84 | 1.34 | 6.20E-01 | A | 0.17 | A | 0.33 |
| rs2272611  | ARHGEF10 | 0.93 | 0.69 | 1.24 | 6.20E-01 | A | 0.09 | A | 0.15 |
| rs543573   | SETX     | 1.06 | 0.83 | 1.36 | 6.20E-01 | C | 0.36 | T | 0.18 |
| rs11875    | MGST1    | 0.90 | 0.59 | 1.38 | 6.21E-01 | A | 0.03 | A | 0.08 |
| rs1805415  | PARP1    | 1.07 | 0.81 | 1.41 | 6.21E-01 | A | 0.12 | A | 0.19 |
| rs1270764  | TSSK4    | 0.81 | 0.36 | 1.84 | 6.21E-01 | C | 0.14 | C | 0.00 |
| rs1799964  | LTA      | 1.07 | 0.83 | 1.37 | 6.21E-01 | C | 0.18 | C | 0.22 |
| rs1800610  | TNF      | 1.10 | 0.75 | 1.60 | 6.22E-01 | T | 0.05 | T | 0.09 |
| rs3218649  | POLQ     | 0.95 | 0.77 | 1.17 | 6.22E-01 | C | 0.42 | C | 0.35 |
| rs1390358  | NAT2     | 0.95 | 0.77 | 1.17 | 6.22E-01 | C | 0.21 | C | 0.40 |
| rs4292454  | GHR      | 1.06 | 0.85 | 1.31 | 6.22E-01 | T | 0.32 | C | 0.39 |
| rs2278815  | LEP      | 0.95 | 0.76 | 1.18 | 6.22E-01 | A | 0.13 | G | 0.45 |
| rs1537234  | GSTM3    | 1.06 | 0.85 | 1.31 | 6.23E-01 | T | 0.21 | T | 0.43 |
| rs1042031  | APOB     | 0.93 | 0.71 | 1.22 | 6.23E-01 | A | 0.20 | A | 0.17 |
| rs6901410  | PPARD    | 0.92 | 0.65 | 1.30 | 6.24E-01 | T | 0.37 | C | 0.07 |
| rs4919682  | CYP17A1  | 1.06 | 0.84 | 1.33 | 6.24E-01 | T | 0.14 | T | 0.29 |
| rs235768   | BMP2     | 1.06 | 0.84 | 1.33 | 6.24E-01 | A | 0.05 | A | 0.38 |
| rs10228128 | SHFM1    | 1.19 | 0.59 | 2.39 | 6.25E-01 | C | 0.08 | C | 0.00 |
| rs1061047  | GPRC5A   | 1.06 | 0.83 | 1.36 | 6.25E-01 | C | 0.28 | C | 0.23 |
| rs2256871  | CYP2C9   | 0.79 | 0.30 | 2.07 | 6.26E-01 | C | 0.08 | 0 | 0.00 |
| rs1056522  | CHST13   | 1.06 | 0.85 | 1.31 | 6.26E-01 | T | 0.46 | T | 0.31 |
| rs2280789  | CCL5     | 0.93 | 0.69 | 1.25 | 6.27E-01 | C | 0.18 | C | 0.14 |
| rs593818   | CYP4F12  | 1.06 | 0.85 | 1.31 | 6.27E-01 | A | 0.42 | A | 0.45 |
| rs2280509  | FZD7     | 1.07 | 0.81 | 1.43 | 6.27E-01 | T | 0.05 | T | 0.18 |
| rs1395119  | SIM1     | 0.95 | 0.76 | 1.18 | 6.27E-01 | T | 0.24 | T | 0.36 |
| rs9529     | CCND3    | 0.94 | 0.73 | 1.21 | 6.27E-01 | A | 0.03 | A | 0.28 |
| rs1169288  | HNF1A    | 0.94 | 0.72 | 1.22 | 6.27E-01 | G | 0.13 | G | 0.32 |
| rs5939     | PTAFR    | 0.75 | 0.24 | 2.39 | 6.28E-01 | G | 0.07 | G | 0.00 |
| rs7775     | FRZB     | 0.92 | 0.64 | 1.31 | 6.28E-01 | G | 0.31 | G | 0.07 |

|            |            |      |      |      |          |   |      |   |      |
|------------|------------|------|------|------|----------|---|------|---|------|
| rs8187692  | ABCC2      | 0.77 | 0.27 | 2.22 | 6.28E-01 | T | 0.07 | T | 0.00 |
| rs3828855  | BYSL       | 1.09 | 0.78 | 1.52 | 6.29E-01 | A | 0.10 | A | 0.10 |
| rs2167270  | LEP        | 1.05 | 0.85 | 1.30 | 6.29E-01 | A | 0.43 | A | 0.38 |
| rs1799986  | LRP1       | 0.92 | 0.66 | 1.28 | 6.29E-01 | T | 0.06 | T | 0.13 |
| rs3731151  | XPC        | 0.94 | 0.74 | 1.20 | 6.29E-01 | A | 0.29 | A | 0.26 |
| rs2283512  | ABCC1      | 1.06 | 0.85 | 1.32 | 6.29E-01 | G | 0.38 | T | 0.32 |
| rs8032477  | IGF1R      | 0.95 | 0.76 | 1.18 | 6.29E-01 | T | 0.32 | C | 0.41 |
| rs2235040  | ABCB1      | 1.09 | 0.77 | 1.52 | 6.30E-01 | A | 0.13 | A | 0.11 |
| rs2778979  | PLXDC2     | 0.93 | 0.68 | 1.27 | 6.31E-01 | T | 0.07 | T | 0.13 |
| rs1047643  | FDFT1      | 1.07 | 0.81 | 1.40 | 6.31E-01 | C | 0.35 | C | 0.14 |
| rs3738099  | ALPL       | 0.93 | 0.68 | 1.27 | 6.31E-01 | G | 0.27 | G | 0.12 |
| rs3088440  | C9orf53    | 1.08 | 0.78 | 1.51 | 6.31E-01 | A | 0.16 | A | 0.11 |
| rs2285460  | BLM        | 0.94 | 0.72 | 1.22 | 6.31E-01 | T | 0.25 | T | 0.19 |
| rs989902   | PTPN13     | 1.06 | 0.84 | 1.32 | 6.31E-01 | A | 0.20 | C | 0.39 |
| rs2273642  | NFATC2     | 1.06 | 0.84 | 1.34 | 6.31E-01 | A | 0.20 | A | 0.29 |
| rs2522391  | RAD50      | 0.86 | 0.47 | 1.58 | 6.32E-01 | A | 0.24 | A | 0.01 |
| rs2233406  | NFKBIA     | 0.94 | 0.75 | 1.19 | 6.32E-01 | T | 0.27 | T | 0.27 |
| rs619824   | CYP17A1    | 1.05 | 0.85 | 1.30 | 6.32E-01 | G | 0.34 | T | 0.46 |
| rs5988     | F13A1      | 0.93 | 0.70 | 1.24 | 6.34E-01 | C | 0.18 | C | 0.16 |
| rs2231142  | ABCG2      | 0.91 | 0.63 | 1.32 | 6.34E-01 | A | 0.03 | A | 0.12 |
| rs279942   | SLC10A2    | 1.06 | 0.83 | 1.35 | 6.36E-01 | G | 0.28 | G | 0.22 |
| rs2228226  | ARHGAP9    | 1.05 | 0.85 | 1.32 | 6.36E-01 | G | 0.25 | G | 0.34 |
| rs3759259  | STYK1      | 1.05 | 0.85 | 1.30 | 6.36E-01 | G | 0.35 | A | 0.35 |
| rs2066530  | FMO3       | 0.72 | 0.19 | 2.79 | 6.37E-01 | C | 0.06 | C | 0.00 |
| rs838827   | IKBKAP     | 0.91 | 0.61 | 1.36 | 6.37E-01 | T | 0.11 | T | 0.07 |
| rs4577050  | SLC12A6    | 0.95 | 0.75 | 1.19 | 6.37E-01 | A | 0.38 | G | 0.34 |
| rs35599    | ABCC1      | 1.08 | 0.79 | 1.48 | 6.37E-01 | C | 0.09 | C | 0.12 |
| rs3732378  | CX3CR1     | 0.93 | 0.69 | 1.25 | 6.37E-01 | A | 0.04 | A | 0.18 |
| rs1374993  | C8orf42    | 1.06 | 0.84 | 1.33 | 6.37E-01 | G | 0.30 | G | 0.34 |
| rs5882     | CETP       | 1.05 | 0.85 | 1.30 | 6.38E-01 | A | 0.42 | G | 0.33 |
| rs1514499  | DPYD       | 1.19 | 0.57 | 2.51 | 6.39E-01 | C | 0.07 | C | 0.01 |
| rs1126526  | ATF3       | 0.94 | 0.72 | 1.23 | 6.39E-01 | T | 0.12 | T | 0.19 |
| rs1884614  | HNF4a      | 0.94 | 0.72 | 1.22 | 6.39E-01 | T | 0.13 | T | 0.21 |
| rs907807   | IGF1R      | 1.07 | 0.81 | 1.42 | 6.39E-01 | G | 0.33 | G | 0.13 |
| rs3750898  | DCLRE1A    | 0.94 | 0.74 | 1.21 | 6.39E-01 | C | 0.38 | G | 0.23 |
| rs1801018  | BCL2       | 0.95 | 0.75 | 1.20 | 6.40E-01 | G | 0.10 | G | 0.42 |
| rs1201689  | MAPKBP1    | 0.94 | 0.74 | 1.20 | 6.40E-01 | G | 0.36 | G | 0.37 |
| rs12636461 | PPARG      | 0.95 | 0.75 | 1.19 | 6.40E-01 | G | 0.27 | G | 0.29 |
| rs2972164  | PPARG      | 1.06 | 0.84 | 1.33 | 6.40E-01 | C | 0.23 | T | 0.44 |
| rs12450550 | EME1       | 1.06 | 0.83 | 1.35 | 6.40E-01 | C | 0.11 | C | 0.28 |
| rs241447   | TAP2       | 0.94 | 0.73 | 1.21 | 6.40E-01 | G | 0.16 | G | 0.24 |
| rs246217   | ABCC1      | 0.93 | 0.70 | 1.25 | 6.41E-01 | A | 0.16 | A | 0.14 |
| rs4148416  | ABCC3      | 1.10 | 0.73 | 1.66 | 6.41E-01 | T | 0.19 | T | 0.06 |
| rs10018284 | Intergenic | 1.05 | 0.85 | 1.31 | 6.41E-01 | C | 0.34 | C | 0.34 |
| rs1042157  | SULT1A1    | 1.05 | 0.85 | 1.31 | 6.42E-01 | T | 0.23 | T | 0.42 |
| rs709816   | NBN        | 0.95 | 0.77 | 1.17 | 6.42E-01 | A | 0.24 | G | 0.38 |
| rs3739927  | SETX       | 0.88 | 0.52 | 1.50 | 6.42E-01 | G | 0.13 | G | 0.04 |
| rs3813572  | PSMA4      | 1.05 | 0.85 | 1.31 | 6.43E-01 | G | 0.15 | G | 0.41 |
| rs2980374  | CYP3A7     | 0.85 | 0.44 | 1.67 | 6.43E-01 | T | 0.21 | T | 0.00 |
| rs6720173  | ABCG5      | 1.06 | 0.82 | 1.38 | 6.43E-01 | C | 0.29 | C | 0.17 |

|            |              |      |      |      |          |   |      |   |      |
|------------|--------------|------|------|------|----------|---|------|---|------|
| rs7871785  | PSMB7        | 0.95 | 0.76 | 1.18 | 6.44E-01 | A | 0.45 | G | 0.42 |
| rs7181886  | CYP19A1      | 1.09 | 0.77 | 1.54 | 6.44E-01 | G | 0.33 | G | 0.06 |
| rs6544718  | ABCG8        | 1.06 | 0.82 | 1.38 | 6.44E-01 | T | 0.04 | T | 0.22 |
| rs1800875  | CMA1         | 0.95 | 0.77 | 1.17 | 6.45E-01 | A | 0.29 | A | 0.50 |
| rs1801198  | TCN2         | 0.95 | 0.76 | 1.18 | 6.45E-01 | G | 0.26 | G | 0.43 |
| rs833061   | VEGFA        | 1.05 | 0.85 | 1.29 | 6.45E-01 | C | 0.34 | C | 0.49 |
| rs8191842  | IGF2R        | 0.75 | 0.22 | 2.52 | 6.46E-01 | T | 0.05 | T | 0.00 |
| rs77905    | DBH          | 0.95 | 0.77 | 1.17 | 6.47E-01 | T | 0.44 | T | 0.47 |
| rs160632   | RIOK2        | 0.95 | 0.77 | 1.17 | 6.47E-01 | G | 0.48 | G | 0.41 |
| rs3093664  | TNF          | 1.09 | 0.75 | 1.58 | 6.48E-01 | G | 0.10 | G | 0.07 |
| rs25882    | CSF2         | 0.94 | 0.73 | 1.22 | 6.48E-01 | C | 0.31 | C | 0.21 |
| rs2953993  | POLB         | 0.93 | 0.67 | 1.28 | 6.49E-01 | G | 0.36 | A | 0.08 |
| rs2228468  | CCBP2        | 0.95 | 0.76 | 1.19 | 6.50E-01 | C | 0.25 | C | 0.38 |
| rs10264272 | CYP3A5       | 0.80 | 0.30 | 2.13 | 6.50E-01 | T | 0.09 | T | 0.00 |
| rs10898    | LOC100129773 | 0.95 | 0.74 | 1.21 | 6.52E-01 | C | 0.37 | C | 0.26 |
| rs4148380  | ABCC1        | 0.89 | 0.55 | 1.46 | 6.52E-01 | A | 0.03 | A | 0.06 |
| rs2687080  | CYP3A7       | 0.82 | 0.35 | 1.92 | 6.52E-01 | C | 0.11 | C | 0.00 |
| rs11549465 | HIF1A        | 1.09 | 0.74 | 1.60 | 6.52E-01 | T | 0.03 | T | 0.10 |
| rs2452600  | PDLIM5       | 0.95 | 0.74 | 1.21 | 6.52E-01 | T | 0.15 | T | 0.31 |
| rs2041049  | DBF4         | 1.13 | 0.66 | 1.96 | 6.53E-01 | C | 0.08 | C | 0.03 |
| rs290861   | DPYD         | 1.07 | 0.81 | 1.40 | 6.53E-01 | G | 0.25 | G | 0.17 |
| rs1505     | CYP2C9       | 0.95 | 0.76 | 1.19 | 6.53E-01 | C | 0.33 | C | 0.34 |
| rs776740   | CYP3A7       | 0.82 | 0.35 | 1.92 | 6.53E-01 | A | 0.11 | A | 0.00 |
| rs5361     | SELE         | 1.09 | 0.75 | 1.57 | 6.53E-01 | C | 0.04 | C | 0.09 |
| rs7904678  | ABCC2        | 1.11 | 0.71 | 1.74 | 6.53E-01 | T | 0.06 | T | 0.05 |
| rs5743612  | TLR1         | 1.23 | 0.50 | 3.00 | 6.53E-01 | T | 0.08 | T | 0.00 |
| rs158634   | DPYD         | 1.06 | 0.81 | 1.39 | 6.54E-01 | G | 0.26 | G | 0.17 |
| rs440454   | RDBP         | 1.05 | 0.84 | 1.33 | 6.54E-01 | T | 0.09 | T | 0.30 |
| rs700518   | CYP19A1      | 1.05 | 0.85 | 1.31 | 6.54E-01 | G | 0.20 | A | 0.50 |
| rs2275565  | MTR          | 1.06 | 0.82 | 1.36 | 6.54E-01 | A | 0.45 | A | 0.22 |
| rs2162679  | IGF1         | 1.06 | 0.81 | 1.39 | 6.54E-01 | G | 0.44 | G | 0.17 |
| rs3100697  | HNMT         | 0.84 | 0.40 | 1.78 | 6.54E-01 | C | 0.18 | C | 0.00 |
| rs699517   | ENOSF1       | 0.95 | 0.76 | 1.18 | 6.55E-01 | C | 0.42 | T | 0.32 |
| rs1056932  | BCL6         | 1.05 | 0.85 | 1.30 | 6.55E-01 | T | 0.17 | C | 0.32 |
| rs1329568  | LOC100130458 | 0.86 | 0.45 | 1.64 | 6.56E-01 | A | 0.16 | A | 0.01 |
| rs3824134  | ARHGEF10     | 0.95 | 0.74 | 1.21 | 6.56E-01 | C | 0.27 | C | 0.23 |
| rs1962589  | IGF1R        | 1.07 | 0.81 | 1.41 | 6.56E-01 | C | 0.45 | C | 0.13 |
| rs3824120  | MYC          | 1.07 | 0.78 | 1.47 | 6.57E-01 | A | 0.05 | A | 0.14 |
| rs2363641  | POMT2        | 0.95 | 0.76 | 1.19 | 6.57E-01 | G | 0.34 | G | 0.32 |
| rs1800791  | FGB          | 0.94 | 0.70 | 1.25 | 6.57E-01 | A | 0.09 | A | 0.18 |
| rs3131637  | TNF          | 0.95 | 0.76 | 1.19 | 6.58E-01 | T | 0.31 | T | 0.36 |
| rs2575875  | ABCA1        | 1.05 | 0.85 | 1.30 | 6.58E-01 | G | 0.32 | A | 0.39 |
| rs2470144  | CYP19A1      | 1.05 | 0.84 | 1.31 | 6.58E-01 | A | 0.10 | G | 0.48 |
| rs680055   | CYP3A43      | 0.92 | 0.62 | 1.36 | 6.58E-01 | C | 0.32 | C | 0.05 |
| rs3020411  | ESR1         | 1.05 | 0.84 | 1.31 | 6.59E-01 | A | 0.40 | G | 0.33 |
| rs189037   | ATM          | 1.05 | 0.85 | 1.29 | 6.59E-01 | A | 0.27 | G | 0.44 |
| rs2057768  | IL4R         | 0.95 | 0.75 | 1.20 | 6.60E-01 | A | 0.27 | A | 0.30 |
| rs2301870  | LPO          | 1.07 | 0.79 | 1.44 | 6.60E-01 | T | 0.24 | T | 0.13 |
| rs752760   | CYP19A1      | 1.05 | 0.84 | 1.30 | 6.60E-01 | C | 0.12 | T | 0.44 |
| rs11862958 | TNFRSF17     | 0.95 | 0.76 | 1.19 | 6.61E-01 | T | 0.13 | T | 0.35 |

|            |            |      |      |      |          |   |      |   |      |
|------------|------------|------|------|------|----------|---|------|---|------|
| rs2107356  | IL4R       | 1.05 | 0.85 | 1.30 | 6.61E-01 | A | 0.22 | A | 0.40 |
| rs877518   | ID3        | 1.09 | 0.75 | 1.58 | 6.62E-01 | A | 0.24 | A | 0.07 |
| rs567754   | BHMT       | 1.05 | 0.83 | 1.33 | 6.62E-01 | T | 0.07 | T | 0.34 |
| rs6637     | GSTZ1      | 0.95 | 0.75 | 1.20 | 6.62E-01 | G | 0.14 | G | 0.40 |
| rs2860840  | CYP2C18    | 0.95 | 0.75 | 1.20 | 6.63E-01 | T | 0.08 | T | 0.35 |
| rs1800331  | FANCA      | 1.10 | 0.73 | 1.65 | 6.63E-01 | T | 0.03 | T | 0.08 |
| rs230521   | NFKB1      | 1.05 | 0.84 | 1.31 | 6.64E-01 | G | 0.42 | G | 0.40 |
| rs4803418  | CYP2B6     | 0.95 | 0.75 | 1.21 | 6.64E-01 | G | 0.10 | G | 0.33 |
| rs915907   | CYP2E1     | 1.06 | 0.81 | 1.39 | 6.64E-01 | A | 0.16 | A | 0.17 |
| rs2275566  | MTR        | 0.95 | 0.76 | 1.19 | 6.65E-01 | C | 0.10 | C | 0.33 |
| rs2228224  | GLI1       | 1.05 | 0.84 | 1.31 | 6.65E-01 | A | 0.23 | G | 0.41 |
| rs2279238  | NR1H3      | 1.06 | 0.82 | 1.37 | 6.66E-01 | A | 0.35 | A | 0.18 |
| rs10475    | ATF3       | 1.06 | 0.82 | 1.37 | 6.67E-01 | T | 0.23 | T | 0.23 |
| rs1065780  | IGFBP1     | 1.05 | 0.85 | 1.30 | 6.67E-01 | A | 0.43 | A | 0.40 |
| rs3176879  | VCAM1      | 0.90 | 0.57 | 1.44 | 6.68E-01 | G | 0.29 | G | 0.03 |
| rs442332   | RUNDC2A    | 1.08 | 0.76 | 1.54 | 6.68E-01 | C | 0.26 | C | 0.07 |
| rs2275008  | OSGEP      | 0.95 | 0.76 | 1.19 | 6.68E-01 | G | 0.34 | G | 0.30 |
| rs228832   | NFATC2     | 1.05 | 0.84 | 1.32 | 6.68E-01 | C | 0.40 | T | 0.26 |
| rs11632547 | CYP1A1     | 1.11 | 0.68 | 1.82 | 6.68E-01 | A | 0.10 | A | 0.04 |
| rs8190955  | GSR        | 1.17 | 0.56 | 2.44 | 6.69E-01 | T | 0.08 | T | 0.00 |
| rs2236579  | ITGA8      | 1.06 | 0.80 | 1.42 | 6.70E-01 | C | 0.06 | C | 0.17 |
| rs11229545 | ZFP91      | 1.06 | 0.82 | 1.36 | 6.70E-01 | G | 0.15 | G | 0.24 |
| rs698708   | KDSR       | 1.05 | 0.84 | 1.32 | 6.70E-01 | G | 0.40 | G | 0.27 |
| rs2228083  | ALAD       | 1.08 | 0.75 | 1.55 | 6.70E-01 | T | 0.11 | T | 0.09 |
| rs2286007  | WNK1       | 1.10 | 0.72 | 1.66 | 6.70E-01 | T | 0.01 | T | 0.06 |
| rs3217773  | CCNA2      | 0.95 | 0.75 | 1.20 | 6.71E-01 | C | 0.16 | C | 0.32 |
| rs939336   | ABCC5      | 0.96 | 0.77 | 1.18 | 6.71E-01 | A | 0.25 | A | 0.42 |
| rs729940   | CHGA       | 1.07 | 0.79 | 1.44 | 6.72E-01 | T | 0.05 | T | 0.18 |
| rs1413227  | DPYD       | 1.05 | 0.84 | 1.32 | 6.72E-01 | A | 0.09 | A | 0.33 |
| rs2242578  | GLI1       | 1.05 | 0.85 | 1.30 | 6.73E-01 | C | 0.48 | G | 0.35 |
| rs2111699  | GSTZ1      | 0.95 | 0.76 | 1.19 | 6.73E-01 | G | 0.28 | G | 0.31 |
| rs1132776  | ABCC5      | 0.96 | 0.78 | 1.18 | 6.73E-01 | T | 0.26 | T | 0.43 |
| rs551754   | ABCB11     | 1.05 | 0.85 | 1.29 | 6.74E-01 | A | 0.26 | G | 0.45 |
| rs2927922  | PDSS1      | 0.95 | 0.76 | 1.20 | 6.74E-01 | T | 0.27 | T | 0.38 |
| rs878201   | Intergenic | 1.05 | 0.83 | 1.32 | 6.74E-01 | A | 0.45 | A | 0.28 |
| rs246214   | ABCC1      | 0.94 | 0.69 | 1.27 | 6.74E-01 | T | 0.09 | T | 0.15 |
| rs6540964  | FRAP1      | 0.95 | 0.74 | 1.22 | 6.75E-01 | T | 0.18 | C | 0.26 |
| rs11632814 | CYP1A2     | 1.11 | 0.69 | 1.79 | 6.75E-01 | A | 0.11 | A | 0.04 |
| rs2069522  | CYP1A2     | 1.11 | 0.69 | 1.79 | 6.75E-01 | C | 0.11 | C | 0.04 |
| rs9282787  | MTRR       | 0.94 | 0.71 | 1.25 | 6.76E-01 | C | 0.11 | C | 0.20 |
| rs4883263  | CD163      | 1.08 | 0.75 | 1.57 | 6.76E-01 | T | 0.39 | T | 0.04 |
| rs17342647 | CYP3A43    | 1.08 | 0.76 | 1.53 | 6.76E-01 | T | 0.03 | T | 0.10 |
| rs828052   | DPYD       | 0.96 | 0.77 | 1.18 | 6.76E-01 | T | 0.16 | T | 0.45 |
| rs1034809  | PON2       | 1.05 | 0.84 | 1.31 | 6.76E-01 | A | 0.22 | A | 0.27 |
| rs1065341  | CCL5       | 0.91 | 0.57 | 1.44 | 6.76E-01 | G | 0.22 | G | 0.04 |
| rs2069812  | IL5        | 0.95 | 0.76 | 1.20 | 6.77E-01 | C | 0.18 | T | 0.30 |
| rs1800590  | LPL        | 1.09 | 0.72 | 1.65 | 6.78E-01 | G | 0.38 | G | 0.02 |
| rs4150416  | ERCC3      | 0.95 | 0.76 | 1.20 | 6.78E-01 | G | 0.43 | G | 0.33 |
| rs2291075  | SLCO1B1    | 0.96 | 0.77 | 1.18 | 6.78E-01 | C | 0.44 | T | 0.39 |
| rs9954562  | NFATC1     | 0.96 | 0.77 | 1.18 | 6.78E-01 | T | 0.38 | T | 0.38 |

|            |          |      |      |      |          |   |      |   |      |
|------------|----------|------|------|------|----------|---|------|---|------|
| rs10846748 | SCARB1   | 1.05 | 0.84 | 1.30 | 6.78E-01 | T | 0.45 | T | 0.35 |
| rs459552   | APC      | 0.94 | 0.72 | 1.24 | 6.79E-01 | A | 0.05 | A | 0.23 |
| rs1801157  | CXCL12   | 1.06 | 0.80 | 1.41 | 6.80E-01 | A | 0.06 | A | 0.19 |
| rs1047840  | EXO1     | 1.05 | 0.84 | 1.29 | 6.81E-01 | A | 0.48 | A | 0.37 |
| rs1045020  | SLC22A5  | 1.07 | 0.77 | 1.49 | 6.81E-01 | T | 0.03 | T | 0.14 |
| rs1413233  | DPYD     | 0.78 | 0.23 | 2.59 | 6.81E-01 | C | 0.07 | C | 0.00 |
| rs2856585  | ABCC6    | 0.90 | 0.53 | 1.52 | 6.82E-01 | A | 0.11 | A | 0.07 |
| rs8187710  | ABCC2    | 0.91 | 0.59 | 1.42 | 6.83E-01 | A | 0.17 | A | 0.05 |
| rs497692   | ABCB11   | 0.96 | 0.78 | 1.18 | 6.83E-01 | G | 0.27 | A | 0.45 |
| rs2071336  | TNFRSF17 | 0.89 | 0.51 | 1.55 | 6.83E-01 | T | 0.08 | T | 0.03 |
| rs753381   | PLCG1    | 0.95 | 0.76 | 1.20 | 6.83E-01 | A | 0.07 | A | 0.44 |
| rs3172469  | BCL6     | 1.05 | 0.83 | 1.32 | 6.83E-01 | C | 0.42 | C | 0.26 |
| rs478333   | ABCB11   | 0.96 | 0.78 | 1.18 | 6.84E-01 | T | 0.26 | C | 0.45 |
| rs930508   | MBL2     | 1.06 | 0.81 | 1.37 | 6.84E-01 | G | 0.35 | G | 0.19 |
| rs215073   | ABCC1    | 0.92 | 0.60 | 1.40 | 6.84E-01 | A | 0.07 | A | 0.07 |
| rs3218634  | POLQ     | 1.09 | 0.72 | 1.64 | 6.85E-01 | G | 0.18 | G | 0.06 |
| rs17273563 | BLM      | 1.06 | 0.81 | 1.39 | 6.85E-01 | A | 0.14 | A | 0.18 |
| rs12114000 | CYP3A4   | 1.14 | 0.60 | 2.19 | 6.85E-01 | A | 0.18 | A | 0.00 |
| rs10509681 | CYP2C8   | 1.08 | 0.74 | 1.57 | 6.85E-01 | C | 0.02 | C | 0.10 |
| rs2464196  | HNF1A    | 1.05 | 0.83 | 1.33 | 6.86E-01 | T | 0.14 | T | 0.30 |
| rs693      | APOB     | 1.05 | 0.84 | 1.30 | 6.86E-01 | T | 0.24 | T | 0.48 |
| rs7604639  | MERTK    | 1.04 | 0.85 | 1.29 | 6.88E-01 | G | 0.36 | G | 0.39 |
| rs3093930  | PARP2    | 1.05 | 0.83 | 1.32 | 6.88E-01 | C | 0.33 | T | 0.33 |
| rs2227973  | RAG1     | 1.07 | 0.78 | 1.46 | 6.89E-01 | G | 0.13 | G | 0.11 |
| rs6888011  | ADRB2    | 0.95 | 0.76 | 1.20 | 6.89E-01 | C | 0.39 | C | 0.34 |
| rs2286233  | PON2     | 0.94 | 0.69 | 1.27 | 6.89E-01 | T | 0.25 | T | 0.13 |
| rs3093816  | CCNH     | 1.05 | 0.84 | 1.30 | 6.91E-01 | C | 0.25 | C | 0.41 |
| rs3750050  | PTPN12   | 1.05 | 0.82 | 1.36 | 6.91E-01 | G | 0.24 | G | 0.19 |
| rs2074086  | ABCC1    | 1.05 | 0.84 | 1.31 | 6.91E-01 | T | 0.34 | C | 0.32 |
| rs12373018 | TRAP1    | 1.06 | 0.80 | 1.41 | 6.92E-01 | C | 0.03 | C | 0.17 |
| rs930507   | MBL2     | 1.05 | 0.81 | 1.37 | 6.92E-01 | G | 0.34 | G | 0.17 |
| rs932477   | ESR1     | 0.94 | 0.67 | 1.30 | 6.92E-01 | A | 0.19 | A | 0.11 |
| rs4526098  | RAD50    | 0.88 | 0.47 | 1.65 | 6.94E-01 | G | 0.25 | G | 0.01 |
| rs9403723  | SIM1     | 0.96 | 0.77 | 1.19 | 6.95E-01 | G | 0.24 | G | 0.36 |
| rs4646491  | CYP4B1   | 1.06 | 0.78 | 1.45 | 6.96E-01 | T | 0.06 | T | 0.15 |
| rs905594   | ATF6     | 0.96 | 0.77 | 1.19 | 6.96E-01 | C | 0.14 | T | 0.38 |
| rs40401    | IL3      | 1.05 | 0.83 | 1.32 | 6.97E-01 | C | 0.45 | T | 0.24 |
| rs3778082  | ESR1     | 0.94 | 0.70 | 1.26 | 6.97E-01 | A | 0.43 | A | 0.12 |
| rs2070682  | SERPINE1 | 0.96 | 0.77 | 1.19 | 6.98E-01 | C | 0.49 | C | 0.42 |
| rs2069824  | IL6      | 0.93 | 0.63 | 1.36 | 6.98E-01 | C | 0.12 | C | 0.08 |
| rs1802059  | MTRR     | 1.04 | 0.84 | 1.30 | 6.98E-01 | A | 0.28 | A | 0.36 |
| rs1760210  | DPYD     | 0.95 | 0.73 | 1.24 | 6.98E-01 | C | 0.19 | C | 0.18 |
| rs2243270  | IL4      | 1.05 | 0.82 | 1.34 | 7.00E-01 | A | 0.34 | G | 0.19 |
| rs3136748  | POLB     | 1.08 | 0.73 | 1.59 | 7.00E-01 | T | 0.29 | T | 0.04 |
| rs246230   | ABCC1    | 1.05 | 0.80 | 1.38 | 7.00E-01 | T | 0.34 | T | 0.14 |
| rs610611   | MRE11A   | 0.95 | 0.75 | 1.21 | 7.01E-01 | A | 0.26 | A | 0.31 |
| rs480562   | ABCB11   | 0.96 | 0.78 | 1.19 | 7.01E-01 | T | 0.44 | A | 0.44 |
| rs11539762 | MYEOV    | 0.93 | 0.66 | 1.32 | 7.02E-01 | A | 0.11 | A | 0.11 |
| rs4149180  | SLC22A8  | 1.09 | 0.71 | 1.66 | 7.02E-01 | G | 0.46 | A | 0.03 |
| rs2291439  | RAD54B   | 0.96 | 0.77 | 1.19 | 7.02E-01 | G | 0.36 | G | 0.37 |

|            |          |      |      |      |          |   |      |   |      |
|------------|----------|------|------|------|----------|---|------|---|------|
| rs11700112 | PAK7     | 1.07 | 0.77 | 1.48 | 7.02E-01 | G | 0.07 | G | 0.11 |
| rs3788409  | XBP1     | 1.04 | 0.84 | 1.29 | 7.03E-01 | T | 0.47 | G | 0.32 |
| rs4646315  | COMT     | 1.06 | 0.80 | 1.40 | 7.03E-01 | C | 0.12 | C | 0.18 |
| rs16963927 | CCL5     | 0.91 | 0.57 | 1.46 | 7.03E-01 | G | 0.21 | G | 0.04 |
| rs35592    | ABCC1    | 0.96 | 0.76 | 1.21 | 7.04E-01 | T | 0.49 | C | 0.23 |
| rs3824874  | MTMR2    | 1.05 | 0.83 | 1.33 | 7.05E-01 | G | 0.13 | G | 0.37 |
| rs882709   | SETX     | 1.06 | 0.77 | 1.46 | 7.05E-01 | G | 0.23 | G | 0.08 |
| rs215067   | ABCC1    | 1.09 | 0.70 | 1.68 | 7.06E-01 | G | 0.02 | G | 0.06 |
| rs2687074  | CYP3A7   | 0.88 | 0.45 | 1.71 | 7.06E-01 | C | 0.21 | C | 0.00 |
| rs230533   | NFKB1    | 1.05 | 0.83 | 1.32 | 7.06E-01 | T | 0.20 | T | 0.33 |
| rs2066534  | FMO3     | 0.96 | 0.77 | 1.20 | 7.07E-01 | G | 0.22 | G | 0.23 |
| rs2020924  | PLAT     | 0.93 | 0.66 | 1.33 | 7.07E-01 | C | 0.02 | C | 0.13 |
| rs8353     | KLHL22   | 0.95 | 0.73 | 1.24 | 7.08E-01 | T | 0.04 | T | 0.23 |
| rs10515114 | CARTPT   | 1.06 | 0.78 | 1.45 | 7.08E-01 | C | 0.22 | C | 0.10 |
| rs2267130  | CHEK2    | 0.96 | 0.78 | 1.19 | 7.09E-01 | C | 0.09 | C | 0.46 |
| rs3176260  | FGF17    | 1.07 | 0.76 | 1.51 | 7.09E-01 | T | 0.03 | T | 0.12 |
| rs2241766  | ADIPOQ   | 0.94 | 0.66 | 1.33 | 7.09E-01 | G | 0.04 | G | 0.12 |
| rs2151846  | ABCA4    | 0.96 | 0.78 | 1.19 | 7.10E-01 | C | 0.40 | C | 0.40 |
| rs16880254 | TPMT     | 1.09 | 0.68 | 1.75 | 7.10E-01 | G | 0.07 | G | 0.05 |
| rs2097461  | XBP1     | 1.04 | 0.84 | 1.28 | 7.10E-01 | T | 0.48 | C | 0.32 |
| rs351855   | FGFR4    | 0.95 | 0.75 | 1.22 | 7.10E-01 | T | 0.12 | T | 0.34 |
| rs1062033  | CYP19A1  | 1.04 | 0.84 | 1.30 | 7.10E-01 | C | 0.14 | C | 0.46 |
| rs1051740  | EPHX1    | 1.04 | 0.83 | 1.32 | 7.10E-01 | C | 0.18 | C | 0.33 |
| rs1800451  | MBL2     | 1.08 | 0.72 | 1.62 | 7.11E-01 | A | 0.27 | A | 0.02 |
| rs1861887  | GSTZ1    | 1.05 | 0.81 | 1.37 | 7.11E-01 | T | 0.13 | T | 0.19 |
| rs1424482  | ALDH1A1  | 0.96 | 0.77 | 1.20 | 7.11E-01 | T | 0.33 | C | 0.35 |
| rs2953983  | POLB     | 0.94 | 0.68 | 1.30 | 7.12E-01 | T | 0.36 | C | 0.08 |
| rs2271922  | MEIS2    | 0.92 | 0.59 | 1.43 | 7.12E-01 | C | 0.30 | C | 0.03 |
| rs169758   | TPTE     | 1.09 | 0.70 | 1.69 | 7.12E-01 | A | 0.26 | A | 0.05 |
| rs1805386  | LIG4     | 1.05 | 0.80 | 1.40 | 7.12E-01 | C | 0.09 | C | 0.18 |
| rs854548   | PPP1R9A  | 1.04 | 0.83 | 1.32 | 7.12E-01 | A | 0.34 | A | 0.27 |
| rs2375744  | HNMT     | 1.05 | 0.80 | 1.38 | 7.12E-01 | A | 0.05 | A | 0.19 |
| rs747659   | PARP1    | 0.95 | 0.72 | 1.25 | 7.14E-01 | T | 0.36 | T | 0.18 |
| rs3218619  | FAS      | 1.16 | 0.53 | 2.55 | 7.14E-01 | A | 0.11 | 0 | 0.00 |
| rs2020865  | FMO2     | 1.07 | 0.74 | 1.54 | 7.14E-01 | G | 0.27 | G | 0.05 |
| rs6763816  | TNFSF10  | 0.80 | 0.23 | 2.70 | 7.15E-01 | T | 0.05 | 0 | 0.00 |
| rs1061622  | TNFRSF1B | 1.04 | 0.83 | 1.32 | 7.15E-01 | G | 0.21 | G | 0.24 |
| rs10857971 | PPM1J    | 0.83 | 0.32 | 2.20 | 7.16E-01 | C | 0.09 | C | 0.00 |
| rs518276   | MRE11A   | 1.04 | 0.85 | 1.28 | 7.17E-01 | A | 0.46 | A | 0.40 |
| rs611251   | PPP1R15A | 0.95 | 0.71 | 1.27 | 7.17E-01 | G | 0.45 | G | 0.13 |
| rs8305     | POLI     | 0.95 | 0.74 | 1.23 | 7.17E-01 | G | 0.06 | G | 0.29 |
| rs5030125  | WT1      | 1.15 | 0.53 | 2.49 | 7.18E-01 | A | 0.09 | A | 0.00 |
| rs503931   | ABCB11   | 0.96 | 0.78 | 1.19 | 7.18E-01 | G | 0.26 | T | 0.45 |
| rs532411   | POLQ     | 1.08 | 0.72 | 1.63 | 7.18E-01 | T | 0.18 | T | 0.06 |
| rs11995670 | ADRB3    | 1.04 | 0.83 | 1.31 | 7.19E-01 | G | 0.18 | G | 0.35 |
| rs35587    | ABCC1    | 0.96 | 0.76 | 1.21 | 7.19E-01 | T | 0.38 | C | 0.30 |
| rs1052369  | ANKRD29  | 1.04 | 0.84 | 1.28 | 7.20E-01 | T | 0.15 | A | 0.41 |
| rs828057   | DPYD     | 0.95 | 0.73 | 1.24 | 7.21E-01 | T | 0.19 | T | 0.18 |
| rs1271079  | MRE11A   | 1.04 | 0.82 | 1.32 | 7.21E-01 | G | 0.17 | G | 0.28 |
| rs1867351  | SLC22A1  | 1.05 | 0.82 | 1.33 | 7.21E-01 | G | 0.31 | G | 0.22 |

|            |          |      |      |      |          |   |      |   |      |
|------------|----------|------|------|------|----------|---|------|---|------|
| rs3766871  | RYR2     | 1.09 | 0.69 | 1.71 | 7.22E-01 | A | 0.15 | A | 0.03 |
| rs1615035  | ANKRD29  | 0.96 | 0.78 | 1.18 | 7.22E-01 | A | 0.49 | G | 0.32 |
| rs1805087  | MTR      | 0.95 | 0.73 | 1.25 | 7.22E-01 | G | 0.22 | G | 0.20 |
| rs2470893  | CYP1A1   | 1.05 | 0.82 | 1.33 | 7.22E-01 | A | 0.06 | A | 0.30 |
| rs2297595  | DPYD     | 1.07 | 0.74 | 1.53 | 7.23E-01 | C | 0.03 | C | 0.08 |
| rs1051303  | LTBP4    | 1.04 | 0.84 | 1.29 | 7.24E-01 | A | 0.46 | G | 0.42 |
| rs1801020  | F12      | 0.96 | 0.76 | 1.21 | 7.24E-01 | T | 0.44 | T | 0.28 |
| rs2227999  | XPC      | 0.92 | 0.59 | 1.45 | 7.24E-01 | A | 0.02 | A | 0.06 |
| rs1149901  | FLJ45983 | 0.96 | 0.75 | 1.22 | 7.24E-01 | T | 0.11 | T | 0.25 |
| rs4986993  | NAT1     | 0.96 | 0.75 | 1.22 | 7.24E-01 | G | 0.49 | T | 0.25 |
| rs1137100  | LEPR     | 1.04 | 0.82 | 1.32 | 7.25E-01 | G | 0.14 | G | 0.29 |
| UGT2B7_1c  | UGT2B7   | 1.06 | 0.77 | 1.46 | 7.25E-01 | G | 0.16 | G | 0.12 |
| rs1800790  | FGB      | 1.05 | 0.80 | 1.38 | 7.26E-01 | A | 0.04 | A | 0.20 |
| rs25406    | PCNA     | 0.96 | 0.78 | 1.19 | 7.27E-01 | T | 0.42 | T | 0.40 |
| rs638456   | DPYD     | 1.04 | 0.84 | 1.28 | 7.27E-01 | C | 0.42 | C | 0.38 |
| rs10082466 | MBL2     | 0.96 | 0.76 | 1.21 | 7.28E-01 | G | 0.43 | G | 0.24 |
| rs2955617  | SHBG     | 0.96 | 0.77 | 1.20 | 7.28E-01 | T | 0.27 | G | 0.34 |
| rs7175052  | IGF1R    | 1.04 | 0.82 | 1.34 | 7.28E-01 | A | 0.29 | A | 0.21 |
| rs2120132  | MBL2     | 0.96 | 0.76 | 1.21 | 7.28E-01 | C | 0.43 | C | 0.24 |
| rs1219663  | ACBD3    | 0.96 | 0.75 | 1.22 | 7.28E-01 | C | 0.25 | C | 0.22 |
| rs3181217  | IL12B    | 1.04 | 0.82 | 1.32 | 7.29E-01 | A | 0.31 | A | 0.23 |
| rs1503185  | PTPRJ    | 0.95 | 0.70 | 1.28 | 7.30E-01 | T | 0.28 | T | 0.15 |
| rs6512087  | CIB3     | 0.96 | 0.74 | 1.23 | 7.30E-01 | C | 0.27 | C | 0.19 |
| rs1138358  | BCL2A1   | 1.04 | 0.83 | 1.29 | 7.30E-01 | T | 0.42 | G | 0.29 |
| rs13181    | ERCC2    | 0.96 | 0.77 | 1.20 | 7.31E-01 | G | 0.22 | G | 0.36 |
| rs11572076 | CYP2C8   | 0.86 | 0.37 | 2.01 | 7.31E-01 | A | 0.15 | A | 0.00 |
| rs1800391  | WRN      | 1.08 | 0.70 | 1.65 | 7.31E-01 | A | 0.01 | A | 0.08 |
| rs3743591  | TNFRSF17 | 1.07 | 0.72 | 1.60 | 7.31E-01 | G | 0.24 | G | 0.05 |
| rs31473    | CSF2     | 1.04 | 0.82 | 1.32 | 7.32E-01 | A | 0.43 | T | 0.24 |
| rs2017662  | TNFRSF17 | 1.07 | 0.72 | 1.60 | 7.32E-01 | T | 0.24 | T | 0.05 |
| rs2706377  | RAD50    | 0.90 | 0.49 | 1.66 | 7.33E-01 | G | 0.24 | G | 0.01 |
| rs1920313  | SLC15A2  | 0.82 | 0.26 | 2.59 | 7.33E-01 | A | 0.07 | O | 0.00 |
| rs275652   | AGTR1    | 0.95 | 0.73 | 1.25 | 7.33E-01 | C | 0.27 | C | 0.17 |
| rs246228   | ABCC1    | 0.96 | 0.76 | 1.21 | 7.33E-01 | A | 0.38 | C | 0.30 |
| rs2239995  | ABCC1    | 1.05 | 0.79 | 1.39 | 7.33E-01 | A | 0.10 | A | 0.19 |
| rs848291   | FANCL    | 0.96 | 0.76 | 1.21 | 7.33E-01 | T | 0.12 | T | 0.38 |
| rs1800787  | FGB      | 1.05 | 0.80 | 1.37 | 7.34E-01 | T | 0.10 | T | 0.20 |
| rs1760209  | DPYD     | 0.96 | 0.74 | 1.24 | 7.34E-01 | T | 0.19 | T | 0.18 |
| rs5974     | F11      | 1.05 | 0.79 | 1.39 | 7.35E-01 | G | 0.21 | G | 0.15 |
| rs1496499  | IGFBP3   | 0.96 | 0.78 | 1.19 | 7.35E-01 | T | 0.35 | G | 0.48 |
| rs949037   | BCL2     | 0.96 | 0.77 | 1.20 | 7.35E-01 | T | 0.49 | T | 0.42 |
| rs8058694  | ABCC6    | 0.96 | 0.78 | 1.20 | 7.35E-01 | T | 0.36 | G | 0.50 |
| rs1396080  | CCNA2    | 0.96 | 0.78 | 1.20 | 7.35E-01 | A | 0.38 | C | 0.34 |
| rs2303078  | HMMR     | 0.91 | 0.54 | 1.54 | 7.36E-01 | O | 0.00 | A | 0.06 |
| rs2032583  | ABCB1    | 1.06 | 0.77 | 1.44 | 7.36E-01 | C | 0.15 | C | 0.11 |
| rs2066870  | FGG      | 1.14 | 0.54 | 2.37 | 7.36E-01 | C | 0.08 | C | 0.00 |
| rs10735510 | ATF3     | 1.04 | 0.84 | 1.28 | 7.36E-01 | C | 0.25 | C | 0.47 |
| rs1801426  | BRCA2    | 1.13 | 0.56 | 2.25 | 7.36E-01 | G | 0.11 | G | 0.00 |
| rs10501815 | MRE11A   | 0.94 | 0.63 | 1.38 | 7.36E-01 | A | 0.05 | A | 0.10 |
| rs2020955  | ERCC4    | 0.88 | 0.41 | 1.89 | 7.36E-01 | C | 0.16 | C | 0.00 |

|            |          |      |      |      |          |   |      |   |      |
|------------|----------|------|------|------|----------|---|------|---|------|
| rs1050909  | FBXO25   | 0.96 | 0.77 | 1.21 | 7.37E-01 | G | 0.41 | T | 0.27 |
| rs1183768  | SETX     | 1.04 | 0.81 | 1.34 | 7.37E-01 | T | 0.37 | C | 0.19 |
| rs12418    | CHST3    | 1.04 | 0.84 | 1.28 | 7.38E-01 | A | 0.28 | A | 0.46 |
| rs2522395  | RAD50    | 0.90 | 0.49 | 1.66 | 7.39E-01 | G | 0.24 | G | 0.01 |
| rs248805   | SRD5A1   | 1.04 | 0.84 | 1.27 | 7.39E-01 | A | 0.31 | A | 0.49 |
| rs12828016 | WNK1     | 1.04 | 0.83 | 1.30 | 7.40E-01 | T | 0.47 | T | 0.37 |
| rs135539   | PPARA    | 1.04 | 0.84 | 1.28 | 7.41E-01 | T | 0.35 | G | 0.43 |
| rs1060463  | CYP4F11  | 1.03 | 0.85 | 1.27 | 7.41E-01 | A | 0.48 | G | 0.43 |
| rs1208     | NAT2     | 0.97 | 0.78 | 1.19 | 7.41E-01 | G | 0.34 | G | 0.41 |
| rs2033178  | IGF1     | 0.93 | 0.59 | 1.47 | 7.42E-01 | T | 0.03 | T | 0.07 |
| rs6463524  | PMS2     | 0.96 | 0.75 | 1.23 | 7.43E-01 | G | 0.16 | G | 0.19 |
| rs2269352  | UGT1A8   | 0.95 | 0.68 | 1.32 | 7.43E-01 | C | 0.13 | C | 0.21 |
| rs592943   | MRE11A   | 0.96 | 0.76 | 1.22 | 7.44E-01 | T | 0.25 | T | 0.31 |
| rs1805129  | CHEK2    | 0.92 | 0.54 | 1.55 | 7.45E-01 | G | 0.08 | G | 0.03 |
| rs9997     | KLHL22   | 1.04 | 0.83 | 1.30 | 7.45E-01 | C | 0.49 | C | 0.32 |
| rs2020902  | CASP9    | 0.95 | 0.69 | 1.30 | 7.46E-01 | C | 0.09 | C | 0.14 |
| rs17882248 | IL5RA    | 0.96 | 0.77 | 1.20 | 7.46E-01 | G | 0.38 | G | 0.35 |
| rs2274419  | MUSK     | 1.05 | 0.78 | 1.41 | 7.47E-01 | T | 0.05 | T | 0.14 |
| rs1413239  | DPYD     | 0.96 | 0.77 | 1.20 | 7.47E-01 | C | 0.47 | T | 0.32 |
| rs2320165  | CART     | 0.96 | 0.78 | 1.20 | 7.47E-01 | C | 0.18 | C | 0.48 |
| rs2426157  | PTPN1    | 0.96 | 0.76 | 1.21 | 7.48E-01 | G | 0.18 | G | 0.29 |
| rs3730477  | POLL     | 1.05 | 0.79 | 1.38 | 7.48E-01 | T | 0.06 | T | 0.19 |
| rs735943   | EXO1     | 1.03 | 0.84 | 1.27 | 7.48E-01 | T | 0.38 | T | 0.42 |
| rs2066479  | HSD17B3  | 1.07 | 0.70 | 1.64 | 7.48E-01 | A | 0.08 | A | 0.06 |
| rs4342522  | SHFM1    | 1.04 | 0.82 | 1.33 | 7.49E-01 | G | 0.46 | A | 0.25 |
| rs1008563  | IL8RA    | 0.97 | 0.78 | 1.20 | 7.49E-01 | T | 0.47 | T | 0.42 |
| rs880303   | GJA9     | 0.97 | 0.78 | 1.20 | 7.50E-01 | T | 0.20 | T | 0.41 |
| rs2288831  | IL12B    | 1.04 | 0.82 | 1.31 | 7.50E-01 | C | 0.31 | C | 0.23 |
| rs2297809  | CYP4B1   | 1.05 | 0.78 | 1.42 | 7.50E-01 | A | 0.14 | A | 0.15 |
| rs3808600  | ZHX2     | 1.04 | 0.81 | 1.34 | 7.51E-01 | T | 0.07 | T | 0.33 |
| rs389480   | BLM      | 0.97 | 0.78 | 1.19 | 7.52E-01 | T | 0.47 | T | 0.47 |
| rs2234900  | IL4R     | 0.96 | 0.73 | 1.26 | 7.53E-01 | T | 0.46 | C | 0.14 |
| rs12717    | PSMB1    | 1.03 | 0.84 | 1.28 | 7.53E-01 | G | 0.32 | G | 0.42 |
| rs7804387  | MAD1L1   | 1.06 | 0.72 | 1.56 | 7.54E-01 | A | 0.31 | A | 0.07 |
| rs246240   | ABCC1    | 0.95 | 0.70 | 1.29 | 7.54E-01 | G | 0.10 | G | 0.15 |
| rs552926   | DPYD     | 1.03 | 0.84 | 1.27 | 7.54E-01 | G | 0.43 | G | 0.38 |
| rs3765070  | CYP4F11  | 1.03 | 0.84 | 1.26 | 7.55E-01 | C | 0.48 | T | 0.43 |
| rs2434470  | ALKBH3   | 0.96 | 0.74 | 1.25 | 7.55E-01 | G | 0.08 | G | 0.25 |
| rs17021877 | IKBKE    | 0.88 | 0.38 | 2.02 | 7.55E-01 | A | 0.06 | A | 0.01 |
| rs2847609  | TYMS     | 0.96 | 0.77 | 1.21 | 7.55E-01 | A | 0.42 | G | 0.32 |
| rs338599   | CYP2S1   | 0.93 | 0.61 | 1.44 | 7.56E-01 | C | 0.14 | C | 0.05 |
| rs11569913 | TNFRSF8  | 1.07 | 0.68 | 1.69 | 7.56E-01 | G | 0.18 | G | 0.04 |
| rs13330634 | TNFRSF17 | 1.07 | 0.69 | 1.67 | 7.56E-01 | A | 0.04 | A | 0.07 |
| rs215059   | ABCC1    | 1.05 | 0.78 | 1.41 | 7.56E-01 | T | 0.13 | T | 0.13 |
| rs10520114 | RAD50    | 1.04 | 0.80 | 1.36 | 7.56E-01 | C | 0.10 | C | 0.20 |
| rs2070180  | HCLS1    | 1.04 | 0.82 | 1.32 | 7.57E-01 | A | 0.15 | A | 0.26 |
| rs533984   | MRE11A   | 1.03 | 0.84 | 1.27 | 7.57E-01 | G | 0.37 | A | 0.40 |
| rs2074085  | ABCC1    | 0.95 | 0.70 | 1.30 | 7.58E-01 | G | 0.24 | G | 0.11 |
| rs1046515  | ADCK2    | 1.06 | 0.74 | 1.51 | 7.58E-01 | T | 0.15 | T | 0.09 |
| rs1063857  | VWF      | 0.97 | 0.78 | 1.20 | 7.59E-01 | T | 0.40 | C | 0.34 |

|            |            |      |      |      |          |   |      |   |      |
|------------|------------|------|------|------|----------|---|------|---|------|
| rs506008   | GSTM4      | 1.05 | 0.78 | 1.40 | 7.59E-01 | A | 0.34 | A | 0.14 |
| rs17129772 | IL12RB2    | 1.17 | 0.44 | 3.10 | 7.59E-01 | G | 0.08 | 0 | 0.00 |
| rs4646091  | CASP9      | 0.96 | 0.74 | 1.24 | 7.60E-01 | G | 0.40 | G | 0.21 |
| rs157580   | TOMM40     | 1.04 | 0.82 | 1.30 | 7.60E-01 | G | 0.14 | G | 0.38 |
| rs914959   | DPYD       | 0.97 | 0.78 | 1.20 | 7.60E-01 | A | 0.08 | A | 0.37 |
| rs1800935  | MSH6       | 1.04 | 0.81 | 1.32 | 7.63E-01 | C | 0.15 | C | 0.29 |
| rs4680     | COMT       | 1.04 | 0.83 | 1.29 | 7.63E-01 | A | 0.24 | A | 0.50 |
| rs2070959  | UGT1A10    | 0.96 | 0.76 | 1.22 | 7.63E-01 | G | 0.20 | G | 0.31 |
| rs1131620  | LTBP4      | 1.03 | 0.84 | 1.27 | 7.63E-01 | A | 0.46 | G | 0.43 |
| rs8187858  | ABCC1      | 0.94 | 0.64 | 1.39 | 7.64E-01 | T | 0.03 | T | 0.09 |
| rs2274407  | ABCC4      | 0.94 | 0.64 | 1.38 | 7.64E-01 | A | 0.17 | A | 0.08 |
| rs10018260 | Intergenic | 0.96 | 0.73 | 1.26 | 7.65E-01 | T | 0.15 | T | 0.22 |
| rs1056503  | XRCC4      | 1.04 | 0.80 | 1.35 | 7.65E-01 | G | 0.43 | G | 0.16 |
| rs1805377  | XRCC4      | 1.04 | 0.80 | 1.35 | 7.65E-01 | A | 0.43 | A | 0.16 |
| rs849526   | NRP2       | 1.03 | 0.83 | 1.28 | 7.65E-01 | G | 0.18 | A | 0.47 |
| rs3733549  | BMP3       | 1.05 | 0.74 | 1.50 | 7.65E-01 | A | 0.09 | A | 0.07 |
| rs541463   | PGR        | 0.95 | 0.70 | 1.31 | 7.66E-01 | A | 0.04 | A | 0.16 |
| rs683369   | SLC22A1    | 0.96 | 0.74 | 1.25 | 7.66E-01 | G | 0.04 | G | 0.23 |
| rs2974938  | PPP1R3A    | 0.89 | 0.40 | 1.95 | 7.66E-01 | T | 0.11 | T | 0.00 |
| rs903880   | ABCC1      | 1.04 | 0.81 | 1.33 | 7.67E-01 | C | 0.24 | A | 0.21 |
| rs603965   | CCND1      | 1.03 | 0.84 | 1.27 | 7.67E-01 | A | 0.24 | A | 0.49 |
| rs9436299  | LEPR       | 1.04 | 0.82 | 1.30 | 7.67E-01 | C | 0.14 | C | 0.34 |
| rs17012064 | PTPN13     | 0.84 | 0.25 | 2.74 | 7.68E-01 | C | 0.06 | C | 0.00 |
| rs348463   | ALDH1A1    | 1.04 | 0.81 | 1.32 | 7.69E-01 | C | 0.31 | C | 0.28 |
| rs246220   | ABCC1      | 0.96 | 0.73 | 1.27 | 7.69E-01 | G | 0.33 | G | 0.14 |
| rs2307424  | NR1I3      | 1.04 | 0.82 | 1.30 | 7.69E-01 | T | 0.13 | T | 0.34 |
| rs1801243  | ATP7B      | 0.97 | 0.78 | 1.20 | 7.70E-01 | G | 0.22 | G | 0.50 |
| rs7739752  | PPARD      | 0.95 | 0.68 | 1.33 | 7.71E-01 | C | 0.39 | T | 0.07 |
| rs2227538  | IL8        | 0.90 | 0.45 | 1.79 | 7.71E-01 | T | 0.22 | T | 0.00 |
| rs679620   | MMP3       | 0.97 | 0.78 | 1.20 | 7.72E-01 | A | 0.40 | G | 0.49 |
| rs1801406  | BRCA2      | 1.04 | 0.82 | 1.31 | 7.72E-01 | G | 0.29 | G | 0.29 |
| rs2472304  | CYP1A2     | 1.03 | 0.82 | 1.30 | 7.72E-01 | A | 0.13 | G | 0.41 |
| rs3204141  | ZHX2       | 1.04 | 0.81 | 1.33 | 7.73E-01 | A | 0.07 | A | 0.33 |
| rs3918226  | NOS3       | 1.06 | 0.72 | 1.55 | 7.73E-01 | T | 0.01 | T | 0.08 |
| rs3733182  | STK32B     | 0.96 | 0.71 | 1.28 | 7.73E-01 | C | 0.18 | C | 0.15 |
| rs1042194  | CYP2C18    | 0.96 | 0.70 | 1.30 | 7.74E-01 | T | 0.18 | T | 0.14 |
| rs1144945  | MDM2       | 0.90 | 0.44 | 1.84 | 7.74E-01 | T | 0.05 | T | 0.01 |
| rs798757   | TACC3      | 0.96 | 0.72 | 1.27 | 7.74E-01 | G | 0.22 | G | 0.17 |
| rs4150514  | ERCC3      | 0.96 | 0.74 | 1.25 | 7.74E-01 | G | 0.12 | G | 0.21 |
| rs1805355  | MSH3       | 1.05 | 0.75 | 1.46 | 7.76E-01 | A | 0.18 | A | 0.09 |
| rs735320   | CYP8B1     | 1.04 | 0.80 | 1.36 | 7.76E-01 | A | 0.16 | A | 0.16 |
| rs2074087  | ABCC1      | 1.04 | 0.78 | 1.39 | 7.76E-01 | C | 0.14 | C | 0.17 |
| rs1046428  | GSTZ1      | 1.04 | 0.79 | 1.37 | 7.76E-01 | T | 0.10 | T | 0.19 |
| rs5297     | CYP11B1    | 1.05 | 0.74 | 1.50 | 7.77E-01 | C | 0.27 | C | 0.08 |
| rs1017186  | GSTZ1      | 1.04 | 0.79 | 1.37 | 7.77E-01 | G | 0.10 | G | 0.20 |
| rs7496     | GSTA4      | 1.04 | 0.81 | 1.33 | 7.78E-01 | A | 0.25 | A | 0.14 |
| rs751019   | PTK2B      | 1.03 | 0.83 | 1.28 | 7.78E-01 | C | 0.31 | C | 0.44 |
| rs9286998  | ACBD3      | 0.97 | 0.79 | 1.20 | 7.79E-01 | C | 0.49 | C | 0.44 |
| rs1934954  | CYP2C9     | 0.93 | 0.58 | 1.50 | 7.80E-01 | G | 0.01 | G | 0.07 |
| rs215106   | ABCC1      | 1.05 | 0.77 | 1.43 | 7.80E-01 | G | 0.07 | G | 0.12 |

|            |          |      |      |      |          |   |      |   |      |
|------------|----------|------|------|------|----------|---|------|---|------|
| rs2069832  | IL6      | 1.03 | 0.83 | 1.28 | 7.80E-01 | A | 0.08 | A | 0.37 |
| rs3136027  | LIG3     | 1.06 | 0.69 | 1.65 | 7.80E-01 | T | 0.00 | T | 0.07 |
| rs2144908  | HNF4A    | 0.96 | 0.74 | 1.25 | 7.80E-01 | A | 0.12 | A | 0.21 |
| rs6136     | SELP     | 1.05 | 0.73 | 1.51 | 7.80E-01 | C | 0.00 | C | 0.10 |
| rs17567    | EPS15    | 1.04 | 0.81 | 1.32 | 7.80E-01 | C | 0.50 | C | 0.22 |
| rs4775936  | CYP19A1  | 1.03 | 0.83 | 1.28 | 7.80E-01 | T | 0.15 | T | 0.47 |
| rs2306134  | PPP4R1   | 1.04 | 0.79 | 1.37 | 7.80E-01 | T | 0.18 | T | 0.18 |
| rs1399291  | DPYD     | 0.97 | 0.79 | 1.20 | 7.82E-01 | T | 0.28 | C | 0.49 |
| rs1341163  | CYP2C8   | 0.97 | 0.78 | 1.20 | 7.83E-01 | A | 0.25 | A | 0.42 |
| rs1934985  | CYP2C8   | 0.97 | 0.78 | 1.20 | 7.83E-01 | G | 0.25 | G | 0.42 |
| rs2275620  | CYP2C8   | 0.97 | 0.78 | 1.20 | 7.83E-01 | T | 0.25 | T | 0.42 |
| rs6021275  | NFATC2   | 0.97 | 0.78 | 1.20 | 7.85E-01 | G | 0.40 | G | 0.42 |
| rs2239359  | FANCA    | 1.03 | 0.84 | 1.27 | 7.85E-01 | C | 0.29 | T | 0.42 |
| rs2066457  | PMS1     | 1.18 | 0.36 | 3.92 | 7.86E-01 | C | 0.05 | C | 0.00 |
| rs3789452  | ABCA4    | 1.03 | 0.82 | 1.30 | 7.86E-01 | A | 0.07 | A | 0.33 |
| rs215050   | ABCC1    | 1.04 | 0.79 | 1.36 | 7.86E-01 | A | 0.08 | A | 0.16 |
| rs2227930  | ATR      | 0.97 | 0.78 | 1.20 | 7.87E-01 | T | 0.23 | T | 0.44 |
| rs12714192 | APOB     | 1.12 | 0.49 | 2.55 | 7.87E-01 | A | 0.10 | A | 0.00 |
| rs8064946  | TP53     | 1.04 | 0.77 | 1.40 | 7.87E-01 | G | 0.27 | C | 0.13 |
| rs3766934  | EPHX1    | 1.05 | 0.73 | 1.52 | 7.88E-01 | T | 0.05 | T | 0.10 |
| rs4148301  | UGT2A1   | 0.95 | 0.65 | 1.38 | 7.88E-01 | A | 0.06 | A | 0.09 |
| rs3219484  | MUTYH    | 1.06 | 0.68 | 1.65 | 7.88E-01 | A | 0.01 | A | 0.06 |
| rs1629816  | SEC13L1  | 0.97 | 0.79 | 1.20 | 7.89E-01 | A | 0.44 | A | 0.42 |
| rs1057335  | SERPINF2 | 1.04 | 0.80 | 1.35 | 7.89E-01 | A | 0.23 | A | 0.20 |
| rs17037390 | MTHFR    | 1.04 | 0.79 | 1.36 | 7.90E-01 | A | 0.22 | A | 0.16 |
| rs2256974  | LST1     | 0.96 | 0.74 | 1.26 | 7.90E-01 | T | 0.33 | T | 0.21 |
| rs7578587  | ABCB11   | 1.10 | 0.54 | 2.25 | 7.90E-01 | C | 0.16 | O | 0.00 |
| rs12009    | HSPA5    | 0.97 | 0.79 | 1.19 | 7.90E-01 | T | 0.48 | C | 0.46 |
| rs1800796  | IL6      | 1.05 | 0.73 | 1.51 | 7.90E-01 | C | 0.11 | C | 0.09 |
| rs6457815  | PPARD    | 1.05 | 0.73 | 1.51 | 7.90E-01 | C | 0.42 | C | 0.04 |
| rs4129472  | GHR      | 1.04 | 0.78 | 1.40 | 7.91E-01 | G | 0.04 | G | 0.19 |
| rs1043641  | ACBD3    | 0.96 | 0.72 | 1.28 | 7.91E-01 | A | 0.07 | A | 0.16 |
| rs2227914  | DMC1     | 0.89 | 0.39 | 2.07 | 7.92E-01 | G | 0.14 | G | 0.00 |
| rs16147    | NPY      | 1.03 | 0.83 | 1.28 | 7.92E-01 | G | 0.38 | A | 0.49 |
| rs925585   | IGF1R    | 1.04 | 0.78 | 1.38 | 7.92E-01 | C | 0.16 | C | 0.15 |
| rs1063311  | MAPK1    | 0.97 | 0.77 | 1.22 | 7.92E-01 | A | 0.36 | A | 0.40 |
| rs4725387  | FASTK    | 0.95 | 0.63 | 1.41 | 7.92E-01 | G | 0.03 | G | 0.10 |
| rs1042714  | ADRB2    | 1.03 | 0.83 | 1.28 | 7.93E-01 | G | 0.22 | G | 0.41 |
| rs10824792 | MBL2     | 0.97 | 0.79 | 1.20 | 7.93E-01 | T | 0.20 | C | 0.41 |
| rs5769     | TBXAS1   | 0.88 | 0.34 | 2.28 | 7.94E-01 | G | 0.05 | O | 0.00 |
| rs4148944  | CHST3    | 1.05 | 0.75 | 1.46 | 7.95E-01 | A | 0.31 | A | 0.10 |
| rs10380    | MTRR     | 1.05 | 0.74 | 1.48 | 7.95E-01 | T | 0.29 | T | 0.09 |
| rs4917636  | CYP2C9   | 1.05 | 0.74 | 1.48 | 7.95E-01 | G | 0.02 | G | 0.12 |
| rs6962039  | SLC13A1  | 1.03 | 0.81 | 1.31 | 7.95E-01 | A | 0.33 | A | 0.27 |
| rs2277448  | ALG11    | 0.97 | 0.78 | 1.21 | 7.95E-01 | T | 0.33 | G | 0.31 |
| rs743572   | CYP17A1  | 1.03 | 0.83 | 1.27 | 7.96E-01 | G | 0.38 | G | 0.42 |
| rs1729409  | APOA5    | 1.03 | 0.83 | 1.28 | 7.97E-01 | C | 0.18 | T | 0.47 |
| rs9890721  | MYCBPAP  | 1.03 | 0.82 | 1.29 | 7.97E-01 | T | 0.20 | C | 0.48 |
| rs1934962  | CYP2C9   | 0.91 | 0.43 | 1.92 | 7.98E-01 | T | 0.15 | T | 0.00 |
| rs5960     | F10      | 0.96 | 0.73 | 1.27 | 7.98E-01 | C | 0.49 | C | 0.16 |

|            |          |      |      |      |          |   |      |   |      |
|------------|----------|------|------|------|----------|---|------|---|------|
| rs2976436  | NEFL     | 1.03 | 0.83 | 1.28 | 7.99E-01 | C | 0.29 | T | 0.35 |
| rs16118    | NPY      | 1.03 | 0.83 | 1.27 | 7.99E-01 | C | 0.44 | C | 0.40 |
| rs652438   | MMP12    | 0.94 | 0.59 | 1.50 | 7.99E-01 | G | 0.18 | G | 0.04 |
| rs982424   | MTPP     | 1.05 | 0.73 | 1.51 | 8.00E-01 | C | 0.25 | C | 0.07 |
| rs11770116 | IMPDH1   | 1.03 | 0.82 | 1.29 | 8.00E-01 | T | 0.31 | T | 0.31 |
| rs2392221  | VCAM1    | 0.96 | 0.71 | 1.31 | 8.01E-01 | T | 0.06 | T | 0.16 |
| rs348481   | ALDH1A1  | 1.03 | 0.81 | 1.32 | 8.01E-01 | C | 0.31 | C | 0.22 |
| rs186997   | ALDH1A1  | 0.94 | 0.61 | 1.47 | 8.01E-01 | G | 0.25 | G | 0.03 |
| rs3136820  | APEX1    | 0.97 | 0.79 | 1.20 | 8.02E-01 | G | 0.37 | G | 0.48 |
| rs12713675 | APOB     | 0.90 | 0.39 | 2.06 | 8.02E-01 | A | 0.09 | A | 0.00 |
| rs315952   | IL1RN    | 1.03 | 0.81 | 1.31 | 8.02E-01 | C | 0.43 | C | 0.28 |
| rs2665802  | GH1      | 0.97 | 0.78 | 1.21 | 8.02E-01 | T | 0.14 | T | 0.41 |
| rs2472680  | NR1I2    | 1.07 | 0.65 | 1.75 | 8.02E-01 | T | 0.22 | T | 0.05 |
| rs6131     | SELP     | 0.97 | 0.75 | 1.25 | 8.03E-01 | A | 0.34 | A | 0.18 |
| rs743535   | CYP2E1   | 1.04 | 0.76 | 1.42 | 8.03E-01 | T | 0.17 | T | 0.10 |
| rs10017302 | UGT8     | 0.93 | 0.55 | 1.59 | 8.03E-01 | G | 0.18 | G | 0.02 |
| rs2421047  | IL12B    | 1.03 | 0.82 | 1.30 | 8.03E-01 | A | 0.31 | A | 0.23 |
| rs20579    | LIG1     | 0.96 | 0.72 | 1.30 | 8.03E-01 | T | 0.29 | T | 0.13 |
| rs2267131  | XBP1     | 1.04 | 0.74 | 1.47 | 8.04E-01 | C | 0.04 | C | 0.13 |
| rs1757095  | TNC      | 0.94 | 0.60 | 1.50 | 8.04E-01 | T | 0.11 | T | 0.06 |
| rs1061302  | NBN      | 0.97 | 0.78 | 1.21 | 8.05E-01 | G | 0.22 | G | 0.33 |
| rs2104772  | TNC      | 1.03 | 0.84 | 1.26 | 8.05E-01 | A | 0.44 | T | 0.44 |
| rs2536512  | SOD3     | 1.03 | 0.83 | 1.28 | 8.05E-01 | A | 0.21 | G | 0.38 |
| rs2227928  | ATR      | 0.97 | 0.79 | 1.21 | 8.05E-01 | T | 0.23 | T | 0.44 |
| rs1272744  | MRE11A   | 0.97 | 0.79 | 1.20 | 8.05E-01 | C | 0.47 | C | 0.39 |
| rs1501299  | ADIPOQ   | 1.03 | 0.81 | 1.30 | 8.06E-01 | A | 0.36 | A | 0.27 |
| rs4459610  | ACE      | 1.03 | 0.83 | 1.28 | 8.07E-01 | A | 0.41 | A | 0.46 |
| rs6334     | NTRK1    | 0.96 | 0.72 | 1.29 | 8.08E-01 | A | 0.14 | A | 0.21 |
| rs3734354  | SIM1     | 1.04 | 0.76 | 1.42 | 8.08E-01 | A | 0.03 | A | 0.14 |
| rs2228309  | FASN     | 0.97 | 0.78 | 1.22 | 8.08E-01 | C | 0.49 | T | 0.45 |
| rs4253199  | ERCC6    | 1.16 | 0.35 | 3.90 | 8.09E-01 | T | 0.06 | 0 | 0.00 |
| rs35621    | ABCC1    | 1.04 | 0.76 | 1.42 | 8.10E-01 | T | 0.12 | T | 0.11 |
| rs1005230  | VEGFA    | 1.03 | 0.83 | 1.27 | 8.10E-01 | T | 0.19 | T | 0.49 |
| rs16859180 | STK36    | 1.06 | 0.64 | 1.76 | 8.10E-01 | T | 0.02 | T | 0.06 |
| rs1330286  | ALDH1A1  | 1.03 | 0.82 | 1.29 | 8.10E-01 | C | 0.44 | G | 0.34 |
| rs1788817  | C18orf8  | 0.97 | 0.79 | 1.20 | 8.10E-01 | G | 0.50 | G | 0.49 |
| rs11226    | RAD52    | 0.97 | 0.78 | 1.21 | 8.10E-01 | T | 0.40 | T | 0.47 |
| rs2518144  | AICDA    | 0.97 | 0.79 | 1.20 | 8.11E-01 | G | 0.26 | A | 0.47 |
| rs699947   | VEGFA    | 1.03 | 0.83 | 1.26 | 8.11E-01 | A | 0.19 | A | 0.49 |
| rs361525   | TNF      | 1.06 | 0.67 | 1.65 | 8.11E-01 | A | 0.05 | A | 0.05 |
| rs2071214  | BIRC5    | 0.93 | 0.53 | 1.64 | 8.12E-01 | G | 0.01 | G | 0.05 |
| rs4543     | CYP11B2  | 1.04 | 0.73 | 1.49 | 8.12E-01 | A | 0.21 | A | 0.08 |
| rs12720855 | APOB     | 0.90 | 0.39 | 2.08 | 8.12E-01 | C | 0.09 | C | 0.00 |
| rs3826705  | POU2F2   | 0.96 | 0.67 | 1.36 | 8.13E-01 | C | 0.05 | C | 0.12 |
| rs13332630 | TNFRSF17 | 1.06 | 0.67 | 1.66 | 8.13E-01 | C | 0.04 | C | 0.07 |
| rs701106   | SCARB1   | 1.03 | 0.78 | 1.36 | 8.13E-01 | A | 0.25 | A | 0.17 |
| rs6873545  | GHR      | 0.97 | 0.77 | 1.22 | 8.14E-01 | C | 0.45 | C | 0.26 |
| rs2000813  | LIPG     | 0.97 | 0.76 | 1.24 | 8.14E-01 | T | 0.12 | T | 0.30 |
| rs2687127  | CYP3A7   | 1.09 | 0.51 | 2.33 | 8.14E-01 | C | 0.08 | C | 0.00 |
| rs5186     | AGTR1    | 0.97 | 0.76 | 1.24 | 8.14E-01 | C | 0.06 | C | 0.29 |

|            |          |      |      |      |          |   |      |   |      |
|------------|----------|------|------|------|----------|---|------|---|------|
| rs230532   | NFKB1    | 1.03 | 0.81 | 1.30 | 8.15E-01 | A | 0.15 | A | 0.33 |
| rs10516782 | PTPN13   | 0.97 | 0.73 | 1.29 | 8.15E-01 | G | 0.03 | G | 0.17 |
| rs1990277  | ARVCF    | 0.97 | 0.77 | 1.23 | 8.16E-01 | A | 0.24 | A | 0.40 |
| rs584589   | NGFR     | 0.96 | 0.71 | 1.31 | 8.16E-01 | G | 0.14 | G | 0.14 |
| rs121      | OSBPL3   | 1.03 | 0.83 | 1.27 | 8.17E-01 | A | 0.26 | G | 0.48 |
| rs246221   | ABCC1    | 0.97 | 0.78 | 1.22 | 8.17E-01 | T | 0.39 | C | 0.30 |
| rs11688    | JUN      | 1.05 | 0.68 | 1.62 | 8.19E-01 | A | 0.19 | A | 0.05 |
| rs3744644  | SCARF1   | 1.06 | 0.63 | 1.81 | 8.19E-01 | G | 0.25 | G | 0.01 |
| rs13926    | TRAP1    | 1.03 | 0.82 | 1.28 | 8.19E-01 | G | 0.19 | G | 0.43 |
| rs608452   | MRE11A   | 1.11 | 0.46 | 2.65 | 8.19E-01 | T | 0.11 | T | 0.00 |
| rs680      | IGF2     | 1.03 | 0.81 | 1.30 | 8.20E-01 | A | 0.08 | A | 0.28 |
| rs1105880  | UGT1A10  | 1.03 | 0.82 | 1.28 | 8.20E-01 | C | 0.34 | C | 0.35 |
| rs9332485  | F5       | 1.14 | 0.37 | 3.54 | 8.20E-01 | A | 0.05 | O | 0.00 |
| rs2332673  | BCL2     | 0.95 | 0.61 | 1.47 | 8.20E-01 | C | 0.22 | C | 0.04 |
| rs1801244  | ATP7B    | 0.97 | 0.78 | 1.22 | 8.21E-01 | C | 0.27 | C | 0.48 |
| rs31480    | IL3      | 0.97 | 0.75 | 1.25 | 8.22E-01 | T | 0.15 | T | 0.23 |
| rs2069833  | IL6      | 1.03 | 0.82 | 1.28 | 8.23E-01 | C | 0.08 | C | 0.37 |
| rs1799809  | PROC     | 1.03 | 0.81 | 1.30 | 8.23E-01 | A | 0.33 | G | 0.41 |
| rs2076169  | PPARD    | 0.96 | 0.67 | 1.38 | 8.24E-01 | C | 0.02 | C | 0.10 |
| rs2741045  | UGT1A10  | 1.03 | 0.80 | 1.32 | 8.24E-01 | T | 0.08 | T | 0.28 |
| rs2741046  | UGT1A10  | 1.03 | 0.80 | 1.32 | 8.24E-01 | C | 0.08 | C | 0.28 |
| rs216902   | VWF      | 0.98 | 0.79 | 1.20 | 8.24E-01 | A | 0.33 | A | 0.40 |
| rs1063742  | TACC3    | 0.97 | 0.76 | 1.24 | 8.24E-01 | T | 0.15 | T | 0.26 |
| rs230496   | NFKB1    | 1.03 | 0.82 | 1.28 | 8.24E-01 | G | 0.41 | G | 0.40 |
| rs10977171 | PTPRD    | 0.94 | 0.57 | 1.57 | 8.25E-01 | C | 0.02 | C | 0.06 |
| rs10407115 | PPAP2C   | 1.02 | 0.83 | 1.26 | 8.26E-01 | A | 0.43 | A | 0.43 |
| rs2232642  | LIG4     | 1.09 | 0.52 | 2.28 | 8.26E-01 | A | 0.14 | A | 0.00 |
| rs1566439  | NLRC5    | 1.02 | 0.82 | 1.28 | 8.26E-01 | G | 0.25 | G | 0.40 |
| rs2306283  | SLCO1B1  | 1.02 | 0.82 | 1.28 | 8.26E-01 | T | 0.25 | C | 0.41 |
| rs13428823 | EFR3B    | 1.02 | 0.83 | 1.26 | 8.26E-01 | G | 0.49 | G | 0.38 |
| rs2297322  | SLC15A1  | 1.03 | 0.78 | 1.36 | 8.27E-01 | T | 0.30 | T | 0.14 |
| rs3795837  | ATF3     | 1.04 | 0.76 | 1.41 | 8.27E-01 | C | 0.19 | C | 0.12 |
| rs828059   | DPYD     | 0.97 | 0.75 | 1.26 | 8.27E-01 | G | 0.19 | G | 0.18 |
| rs4244285  | CYP2C19  | 0.97 | 0.71 | 1.31 | 8.28E-01 | A | 0.16 | A | 0.14 |
| rs10018287 | MGC48628 | 1.02 | 0.82 | 1.28 | 8.29E-01 | T | 0.43 | T | 0.32 |
| rs1557044  | CYP2C9   | 0.97 | 0.73 | 1.29 | 8.29E-01 | C | 0.16 | C | 0.18 |
| rs2976437  | NEFL     | 1.02 | 0.82 | 1.28 | 8.29E-01 | A | 0.29 | G | 0.35 |
| rs9840993  | MYLK     | 0.95 | 0.58 | 1.56 | 8.30E-01 | G | 0.33 | G | 0.01 |
| rs1004588  | DGKG     | 1.02 | 0.83 | 1.26 | 8.30E-01 | G | 0.43 | C | 0.47 |
| rs348479   | ALDH1A1  | 1.03 | 0.80 | 1.31 | 8.30E-01 | G | 0.32 | G | 0.21 |
| rs4646316  | COMT     | 0.97 | 0.75 | 1.26 | 8.31E-01 | T | 0.21 | T | 0.23 |
| rs6003071  | MCAT     | 0.98 | 0.79 | 1.21 | 8.33E-01 | T | 0.49 | T | 0.43 |
| rs231775   | CTLA4    | 0.98 | 0.79 | 1.21 | 8.33E-01 | G | 0.42 | G | 0.41 |
| rs3763497  | IGFBP1   | 1.03 | 0.81 | 1.29 | 8.33E-01 | T | 0.21 | T | 0.34 |
| rs3732379  | CX3CR1   | 0.97 | 0.76 | 1.25 | 8.33E-01 | T | 0.14 | T | 0.27 |
| rs408820   | GSTA4    | 0.95 | 0.60 | 1.51 | 8.34E-01 | G | 0.04 | G | 0.06 |
| rs6941     | XRCC5    | 0.96 | 0.69 | 1.35 | 8.35E-01 | A | 0.13 | A | 0.11 |
| rs1051677  | XRCC5    | 0.96 | 0.69 | 1.36 | 8.35E-01 | C | 0.13 | C | 0.11 |
| rs2270565  | UCP1     | 1.05 | 0.69 | 1.59 | 8.36E-01 | A | 0.01 | A | 0.08 |
| rs2153629  | CYP2C9   | 1.04 | 0.73 | 1.49 | 8.36E-01 | G | 0.02 | G | 0.11 |

|            |          |      |      |      |          |   |      |   |      |
|------------|----------|------|------|------|----------|---|------|---|------|
| rs2277119  | CYP39A1  | 0.97 | 0.76 | 1.25 | 8.37E-01 | A | 0.27 | A | 0.23 |
| rs7957203  | SLCO1A2  | 0.98 | 0.78 | 1.22 | 8.37E-01 | T | 0.30 | T | 0.31 |
| rs2243250  | IL4      | 1.03 | 0.80 | 1.31 | 8.37E-01 | C | 0.34 | T | 0.19 |
| rs215048   | ABCC1    | 1.03 | 0.76 | 1.40 | 8.37E-01 | A | 0.06 | A | 0.15 |
| rs2707466  | WNT16    | 1.02 | 0.82 | 1.28 | 8.38E-01 | G | 0.18 | A | 0.44 |
| rs4988515  | IGFBP1   | 0.96 | 0.63 | 1.46 | 8.38E-01 | T | 0.19 | T | 0.05 |
| rs3112831  | ABCA4    | 1.02 | 0.82 | 1.28 | 8.39E-01 | G | 0.23 | G | 0.31 |
| rs5982     | F13A1    | 0.97 | 0.75 | 1.27 | 8.39E-01 | T | 0.13 | T | 0.21 |
| rs9332100  | CYP2C9   | 1.04 | 0.73 | 1.48 | 8.39E-01 | T | 0.02 | T | 0.11 |
| rs6032     | F5       | 0.97 | 0.76 | 1.26 | 8.39E-01 | G | 0.18 | G | 0.28 |
| rs4774584  | CYP19A1  | 1.02 | 0.83 | 1.26 | 8.39E-01 | A | 0.44 | A | 0.45 |
| rs1395     | SLC5A6   | 0.98 | 0.78 | 1.23 | 8.40E-01 | A | 0.26 | G | 0.31 |
| rs2239815  | XBP1     | 0.98 | 0.79 | 1.22 | 8.40E-01 | T | 0.31 | C | 0.32 |
| rs8192284  | IL6R     | 1.02 | 0.81 | 1.29 | 8.40E-01 | C | 0.14 | C | 0.40 |
| rs348462   | ALDH1A1  | 1.02 | 0.81 | 1.30 | 8.41E-01 | G | 0.46 | C | 0.30 |
| rs12917    | MGMT     | 1.03 | 0.76 | 1.40 | 8.41E-01 | T | 0.16 | T | 0.15 |
| rs2140516  | SLC13A1  | 1.02 | 0.82 | 1.28 | 8.41E-01 | C | 0.28 | C | 0.32 |
| rs557806   | PPP1R15A | 0.97 | 0.72 | 1.31 | 8.42E-01 | C | 0.36 | G | 0.12 |
| rs1888202  | ALDH1A1  | 0.98 | 0.79 | 1.22 | 8.42E-01 | G | 0.19 | G | 0.50 |
| rs10473282 | GHR      | 0.98 | 0.78 | 1.23 | 8.42E-01 | A | 0.18 | A | 0.36 |
| rs2279344  | CYP2B6   | 1.02 | 0.81 | 1.30 | 8.43E-01 | G | 0.15 | G | 0.34 |
| rs11572103 | CYP2C8   | 0.93 | 0.44 | 1.97 | 8.43E-01 | T | 0.16 | T | 0.00 |
| rs2252784  | PTPRB    | 0.98 | 0.79 | 1.22 | 8.43E-01 | G | 0.31 | A | 0.42 |
| rs3125001  | NOTCH1   | 1.03 | 0.78 | 1.35 | 8.44E-01 | C | 0.33 | T | 0.39 |
| rs16945474 | PHKB     | 1.04 | 0.68 | 1.61 | 8.44E-01 | G | 0.11 | G | 0.04 |
| rs3212227  | IL12B    | 1.02 | 0.81 | 1.30 | 8.45E-01 | C | 0.32 | C | 0.23 |
| rs2544794  | SULT2B1  | 0.97 | 0.74 | 1.28 | 8.45E-01 | A | 0.24 | A | 0.16 |
| rs215072   | ABCC1    | 0.96 | 0.62 | 1.48 | 8.45E-01 | T | 0.07 | T | 0.06 |
| rs4252596  | ERBB2    | 1.03 | 0.74 | 1.44 | 8.46E-01 | A | 0.03 | A | 0.14 |
| rs2039447  | DPYD     | 0.98 | 0.78 | 1.22 | 8.46E-01 | T | 0.47 | C | 0.32 |
| rs2706358  | RAD50    | 0.94 | 0.51 | 1.75 | 8.46E-01 | A | 0.24 | A | 0.01 |
| rs6163     | CYP17A1  | 1.02 | 0.83 | 1.26 | 8.46E-01 | A | 0.38 | A | 0.42 |
| rs1805794  | NBN      | 0.98 | 0.79 | 1.22 | 8.47E-01 | G | 0.22 | G | 0.33 |
| rs2732497  | PPP3CA   | 0.98 | 0.79 | 1.22 | 8.47E-01 | T | 0.34 | T | 0.49 |
| rs2276583  | ERCC3    | 1.02 | 0.82 | 1.27 | 8.48E-01 | A | 0.23 | A | 0.39 |
| rs1041163  | VCAM1    | 0.97 | 0.74 | 1.28 | 8.48E-01 | C | 0.18 | C | 0.17 |
| rs2281891  | CYP2C18  | 0.97 | 0.72 | 1.32 | 8.49E-01 | A | 0.16 | A | 0.14 |
| rs4986894  | CYP2C19  | 0.97 | 0.72 | 1.32 | 8.49E-01 | C | 0.16 | C | 0.14 |
| rs3791878  | GAD1     | 0.98 | 0.77 | 1.24 | 8.49E-01 | A | 0.06 | A | 0.29 |
| rs2069762  | IL2      | 1.02 | 0.80 | 1.30 | 8.50E-01 | G | 0.12 | G | 0.30 |
| rs16834521 | MTR      | 1.02 | 0.82 | 1.28 | 8.50E-01 | G | 0.22 | G | 0.43 |
| rs5276     | PTGS2    | 0.94 | 0.48 | 1.82 | 8.51E-01 | A | 0.14 | A | 0.00 |
| rs5498     | ICAM1    | 1.02 | 0.81 | 1.29 | 8.52E-01 | G | 0.22 | G | 0.42 |
| rs1805097  | IRS2     | 0.98 | 0.77 | 1.25 | 8.52E-01 | A | 0.13 | A | 0.33 |
| rs5744751  | POLE     | 1.03 | 0.73 | 1.46 | 8.53E-01 | T | 0.02 | T | 0.11 |
| rs2230592  | MST1R    | 1.09 | 0.44 | 2.72 | 8.54E-01 | G | 0.08 | G | 0.00 |
| rs973874   | NAT2     | 1.08 | 0.46 | 2.53 | 8.54E-01 | T | 0.06 | T | 0.01 |
| rs6427384  | FCRL5    | 0.97 | 0.74 | 1.29 | 8.54E-01 | T | 0.41 | C | 0.14 |
| rs12221497 | NR1H3    | 1.03 | 0.74 | 1.44 | 8.55E-01 | A | 0.02 | A | 0.13 |
| rs4633     | COMT     | 1.02 | 0.83 | 1.26 | 8.55E-01 | T | 0.29 | C | 0.48 |

|            |              |      |      |      |          |   |      |   |      |
|------------|--------------|------|------|------|----------|---|------|---|------|
| rs6717546  | UGT1A1       | 1.02 | 0.81 | 1.28 | 8.55E-01 | A | 0.45 | A | 0.36 |
| rs1138294  | MAP3K6       | 0.98 | 0.78 | 1.23 | 8.55E-01 | T | 0.14 | T | 0.36 |
| rs1407309  | TNFSF8       | 1.02 | 0.82 | 1.26 | 8.56E-01 | G | 0.24 | A | 0.47 |
| rs3176875  | VCAM1        | 1.05 | 0.60 | 1.85 | 8.56E-01 | A | 0.13 | A | 0.03 |
| rs2228638  | NRP1         | 1.03 | 0.73 | 1.46 | 8.56E-01 | A | 0.03 | A | 0.11 |
| rs1838066  | MBL2         | 0.98 | 0.79 | 1.22 | 8.57E-01 | G | 0.13 | G | 0.38 |
| rs2352984  | MON1A        | 0.98 | 0.79 | 1.22 | 8.57E-01 | C | 0.39 | C | 0.42 |
| rs2305030  | LTK          | 1.03 | 0.74 | 1.43 | 8.58E-01 | T | 0.12 | T | 0.13 |
| rs11615    | ERCC1        | 0.98 | 0.79 | 1.22 | 8.58E-01 | T | 0.13 | C | 0.41 |
| rs10017306 | SLC39A8      | 0.98 | 0.79 | 1.22 | 8.58E-01 | T | 0.39 | T | 0.40 |
| rs2274750  | TNC          | 1.05 | 0.62 | 1.76 | 8.59E-01 | A | 0.08 | A | 0.03 |
| rs5005     | ADM          | 1.08 | 0.44 | 2.65 | 8.59E-01 | G | 0.06 | G | 0.00 |
| rs2582783  | HMGCS2       | 1.02 | 0.80 | 1.30 | 8.59E-01 | A | 0.38 | A | 0.25 |
| rs458017   | REV3L        | 0.96 | 0.64 | 1.45 | 8.60E-01 | C | 0.06 | C | 0.06 |
| rs5742909  | CTLA4        | 0.97 | 0.66 | 1.42 | 8.60E-01 | T | 0.02 | T | 0.10 |
| rs2758346  | SOD2         | 0.98 | 0.79 | 1.21 | 8.60E-01 | T | 0.40 | C | 0.49 |
| rs428073   | LOC100130562 | 0.98 | 0.78 | 1.23 | 8.61E-01 | C | 0.25 | C | 0.34 |
| rs2082382  | ADRB2        | 0.98 | 0.78 | 1.23 | 8.61E-01 | G | 0.09 | G | 0.41 |
| rs3797897  | MSH3         | 1.03 | 0.73 | 1.45 | 8.61E-01 | G | 0.03 | G | 0.10 |
| rs2180314  | GSTA2        | 0.98 | 0.79 | 1.22 | 8.63E-01 | G | 0.30 | C | 0.38 |
| rs3774306  | BCL6         | 1.02 | 0.82 | 1.26 | 8.63E-01 | A | 0.14 | G | 0.36 |
| rs2023410  | ADRB3        | 0.98 | 0.77 | 1.24 | 8.64E-01 | A | 0.33 | G | 0.21 |
| rs1061040  | SLC7A7       | 0.97 | 0.71 | 1.33 | 8.65E-01 | A | 0.47 | A | 0.10 |
| rs3818644  | DNAJA1       | 1.02 | 0.81 | 1.28 | 8.65E-01 | T | 0.19 | T | 0.36 |
| rs1863703  | STK36        | 1.03 | 0.72 | 1.48 | 8.65E-01 | G | 0.27 | G | 0.06 |
| rs699473   | SOD3         | 1.02 | 0.82 | 1.26 | 8.65E-01 | T | 0.33 | C | 0.36 |
| rs16876805 | PSKH2        | 0.94 | 0.49 | 1.82 | 8.66E-01 | C | 0.15 | C | 0.01 |
| rs7823144  | LSM1         | 1.03 | 0.74 | 1.43 | 8.66E-01 | A | 0.29 | A | 0.08 |
| rs2020869  | FMO2         | 1.02 | 0.77 | 1.36 | 8.66E-01 | G | 0.17 | G | 0.14 |
| rs1140616  | FASN         | 0.98 | 0.78 | 1.23 | 8.67E-01 | T | 0.21 | C | 0.49 |
| rs1059393  | ENOSF1       | 0.97 | 0.71 | 1.33 | 8.67E-01 | C | 0.14 | C | 0.14 |
| rs2016347  | IGF1R        | 0.98 | 0.80 | 1.21 | 8.68E-01 | A | 0.37 | C | 0.47 |
| rs602990   | VAV2         | 1.02 | 0.81 | 1.28 | 8.68E-01 | T | 0.21 | T | 0.48 |
| rs2695232  | SOD3         | 0.98 | 0.79 | 1.22 | 8.68E-01 | T | 0.17 | C | 0.36 |
| rs1157745  | PON1         | 1.02 | 0.82 | 1.27 | 8.69E-01 | G | 0.33 | T | 0.34 |
| rs20581    | LIG1         | 1.02 | 0.82 | 1.26 | 8.69E-01 | T | 0.16 | T | 0.46 |
| rs1048977  | CDA          | 1.02 | 0.82 | 1.27 | 8.69E-01 | T | 0.40 | T | 0.31 |
| rs3738000  | NEK11        | 1.02 | 0.82 | 1.27 | 8.70E-01 | T | 0.29 | A | 0.31 |
| rs215060   | ABCC1        | 0.97 | 0.71 | 1.34 | 8.71E-01 | G | 0.06 | G | 0.13 |
| rs165599   | COMT         | 0.98 | 0.78 | 1.23 | 8.71E-01 | A | 0.31 | G | 0.34 |
| rs7517376  | FMO1         | 0.98 | 0.73 | 1.30 | 8.71E-01 | A | 0.46 | G | 0.13 |
| rs2286194  | HGF          | 0.98 | 0.74 | 1.29 | 8.71E-01 | A | 0.18 | A | 0.20 |
| rs1368408  | SCGB3A2      | 1.02 | 0.77 | 1.35 | 8.71E-01 | A | 0.34 | A | 0.14 |
| rs3176123  | THBD         | 0.98 | 0.73 | 1.31 | 8.71E-01 | C | 0.05 | C | 0.19 |
| rs2159499  | STARD3NL     | 1.02 | 0.82 | 1.26 | 8.72E-01 | G | 0.35 | G | 0.47 |
| rs363717   | ABCA1        | 1.02 | 0.78 | 1.35 | 8.72E-01 | G | 0.08 | G | 0.18 |
| rs11549147 | FDFT1        | 0.97 | 0.63 | 1.48 | 8.73E-01 | G | 0.02 | G | 0.08 |
| rs1856908  | CYP2C9       | 1.02 | 0.82 | 1.27 | 8.73E-01 | T | 0.23 | T | 0.41 |
| rs3914142  | ACBD3        | 0.98 | 0.80 | 1.21 | 8.73E-01 | G | 0.49 | C | 0.45 |
| rs2020911  | MSH6         | 0.98 | 0.78 | 1.23 | 8.74E-01 | T | 0.13 | T | 0.40 |

|            |           |      |      |      |          |   |      |   |      |
|------------|-----------|------|------|------|----------|---|------|---|------|
| rs6489738  | GNB3      | 0.98 | 0.78 | 1.24 | 8.75E-01 | C | 0.25 | T | 0.33 |
| rs3177427  | GSTZ1     | 0.98 | 0.79 | 1.22 | 8.75E-01 | A | 0.27 | A | 0.32 |
| rs2237582  | PON1      | 1.02 | 0.82 | 1.27 | 8.76E-01 | A | 0.30 | G | 0.34 |
| rs2234719  | ABCG1     | 0.98 | 0.77 | 1.25 | 8.77E-01 | T | 0.29 | T | 0.27 |
| rs135549   | PPARA     | 1.02 | 0.82 | 1.27 | 8.77E-01 | A | 0.37 | G | 0.39 |
| rs2020860  | FMO2      | 1.03 | 0.71 | 1.50 | 8.77E-01 | C | 0.24 | C | 0.05 |
| rs20580    | LIG1      | 1.02 | 0.83 | 1.24 | 8.79E-01 | C | 0.42 | A | 0.49 |
| rs2684773  | IGF1R     | 1.02 | 0.77 | 1.35 | 8.81E-01 | G | 0.41 | G | 0.13 |
| rs215095   | ABCC1     | 1.02 | 0.75 | 1.41 | 8.82E-01 | C | 0.05 | C | 0.13 |
| rs3741367  | CD248     | 1.02 | 0.82 | 1.26 | 8.83E-01 | C | 0.22 | C | 0.44 |
| rs1800797  | IL6       | 0.98 | 0.79 | 1.23 | 8.83E-01 | A | 0.08 | A | 0.36 |
| rs11574    | ID3       | 1.02 | 0.79 | 1.31 | 8.85E-01 | A | 0.03 | A | 0.24 |
| rs4698803  | EGF       | 1.02 | 0.77 | 1.35 | 8.85E-01 | A | 0.04 | A | 0.21 |
| rs1652342  | C18orf8   | 1.02 | 0.80 | 1.30 | 8.85E-01 | G | 0.10 | G | 0.35 |
| rs12680113 | ZNF596    | 0.98 | 0.79 | 1.23 | 8.86E-01 | T | 0.24 | T | 0.36 |
| rs13392272 | APOB      | 0.98 | 0.79 | 1.23 | 8.86E-01 | T | 0.23 | T | 0.46 |
| rs2072360  | FOXM1     | 1.02 | 0.78 | 1.33 | 8.86E-01 | G | 0.36 | G | 0.20 |
| rs1051130  | CCND3     | 1.02 | 0.82 | 1.25 | 8.87E-01 | T | 0.15 | T | 0.47 |
| rs1413229  | DPYD      | 0.98 | 0.79 | 1.23 | 8.87E-01 | A | 0.10 | A | 0.36 |
| rs5343     | EDNRA     | 0.98 | 0.78 | 1.24 | 8.87E-01 | T | 0.15 | T | 0.34 |
| rs2072501  | ZNF71     | 0.98 | 0.72 | 1.33 | 8.88E-01 | A | 0.25 | A | 0.18 |
| rs3887412  | ABCC1     | 0.98 | 0.77 | 1.26 | 8.88E-01 | T | 0.49 | T | 0.17 |
| rs2288548  | IMPDH1    | 0.98 | 0.77 | 1.25 | 8.89E-01 | A | 0.30 | A | 0.22 |
| rs11003125 | MBL2      | 0.98 | 0.79 | 1.23 | 8.89E-01 | C | 0.13 | C | 0.38 |
| rs2238476  | ABCC1     | 0.97 | 0.64 | 1.48 | 8.89E-01 | T | 0.03 | T | 0.06 |
| rs2069830  | IL6       | 1.06 | 0.45 | 2.51 | 8.90E-01 | T | 0.09 | T | 0.00 |
| rs7096206  | MBL2      | 1.02 | 0.78 | 1.33 | 8.90E-01 | G | 0.13 | G | 0.22 |
| rs2410478  | NAT1      | 0.92 | 0.30 | 2.87 | 8.91E-01 | C | 0.05 | C | 0.00 |
| rs6671288  | NR1I3     | 0.98 | 0.73 | 1.31 | 8.91E-01 | G | 0.19 | G | 0.16 |
| rs9896405  | EME1      | 0.95 | 0.46 | 1.97 | 8.91E-01 | G | 0.13 | G | 0.00 |
| rs6597801  | LHPP      | 1.02 | 0.72 | 1.46 | 8.91E-01 | A | 0.02 | A | 0.12 |
| rs9282564  | ABCB1     | 1.03 | 0.72 | 1.46 | 8.91E-01 | G | 0.02 | G | 0.11 |
| rs769214   | CAT       | 0.99 | 0.79 | 1.22 | 8.91E-01 | G | 0.39 | G | 0.35 |
| rs584531   | MRE11A    | 0.98 | 0.79 | 1.23 | 8.92E-01 | G | 0.41 | G | 0.31 |
| rs6664     | CHST2     | 0.98 | 0.78 | 1.24 | 8.92E-01 | C | 0.37 | T | 0.33 |
| rs2072651  | TPP1      | 0.98 | 0.75 | 1.29 | 8.92E-01 | T | 0.20 | T | 0.17 |
| rs1980499  | LOC728383 | 1.02 | 0.82 | 1.26 | 8.93E-01 | C | 0.14 | C | 0.50 |
| rs759853   | AKR1B1    | 1.01 | 0.82 | 1.26 | 8.93E-01 | A | 0.22 | A | 0.42 |
| rs1799799  | ERCC4     | 1.02 | 0.81 | 1.27 | 8.93E-01 | C | 0.47 | C | 0.34 |
| rs2269800  | ABCC1     | 0.98 | 0.72 | 1.33 | 8.93E-01 | G | 0.24 | G | 0.11 |
| rs1152888  | IRAK3     | 1.02 | 0.73 | 1.44 | 8.94E-01 | G | 0.50 | A | 0.07 |
| rs1381057  | POLQ      | 0.98 | 0.79 | 1.23 | 8.94E-01 | T | 0.33 | T | 0.31 |
| rs1800849  | UCP3      | 0.98 | 0.76 | 1.27 | 8.94E-01 | T | 0.10 | T | 0.24 |
| rs7185307  | TNFRSF17  | 1.02 | 0.80 | 1.30 | 8.94E-01 | T | 0.25 | C | 0.24 |
| rs596104   | PHGDH     | 0.99 | 0.80 | 1.22 | 8.95E-01 | A | 0.34 | A | 0.44 |
| rs2071724  | TTLL12    | 0.99 | 0.80 | 1.22 | 8.96E-01 | A | 0.45 | A | 0.41 |
| rs1051992  | PRKCDBP   | 0.99 | 0.80 | 1.21 | 8.97E-01 | C | 0.38 | T | 0.46 |
| rs585800   | BHMT      | 1.02 | 0.79 | 1.31 | 8.98E-01 | T | 0.04 | T | 0.27 |
| rs1432793  | SH3TC2    | 1.01 | 0.83 | 1.24 | 8.98E-01 | T | 0.42 | C | 0.46 |
| rs2071746  | HMOX1     | 0.99 | 0.79 | 1.22 | 8.98E-01 | A | 0.33 | T | 0.41 |

|            |           |      |      |      |          |   |      |   |      |
|------------|-----------|------|------|------|----------|---|------|---|------|
| rs1805075  | IGF2R     | 0.97 | 0.61 | 1.55 | 8.99E-01 | G | 0.01 | G | 0.07 |
| rs1970142  | DPYD      | 1.02 | 0.80 | 1.29 | 9.00E-01 | T | 0.08 | T | 0.33 |
| rs6808205  | PLS1      | 1.01 | 0.82 | 1.25 | 9.00E-01 | A | 0.35 | A | 0.38 |
| rs7658300  | TXK       | 1.02 | 0.79 | 1.30 | 9.00E-01 | T | 0.11 | T | 0.36 |
| rs17685    | POR       | 1.02 | 0.79 | 1.30 | 9.02E-01 | T | 0.21 | T | 0.26 |
| rs1802061  | GSTA4     | 1.03 | 0.65 | 1.64 | 9.03E-01 | A | 0.01 | A | 0.06 |
| rs3218012  | CDKN2A    | 0.99 | 0.79 | 1.23 | 9.03E-01 | T | 0.34 | T | 0.46 |
| rs2270165  | STARD3NL  | 0.98 | 0.74 | 1.31 | 9.03E-01 | A | 0.09 | A | 0.16 |
| rs1801274  | FCGR2A    | 0.99 | 0.80 | 1.22 | 9.03E-01 | T | 0.41 | C | 0.47 |
| rs885622   | DPYD      | 1.01 | 0.81 | 1.27 | 9.04E-01 | A | 0.08 | A | 0.35 |
| rs1801376  | BUB1B     | 0.99 | 0.78 | 1.25 | 9.04E-01 | G | 0.19 | G | 0.30 |
| rs9282682  | FANCA     | 1.02 | 0.71 | 1.46 | 9.04E-01 | C | 0.15 | C | 0.09 |
| rs4149963  | EXO1      | 1.02 | 0.71 | 1.47 | 9.04E-01 | T | 0.02 | T | 0.10 |
| rs619487   | PGR       | 0.99 | 0.77 | 1.26 | 9.06E-01 | G | 0.07 | G | 0.32 |
| rs2070744  | NOS3      | 0.99 | 0.78 | 1.25 | 9.07E-01 | C | 0.16 | C | 0.34 |
| rs183484   | RRM1      | 1.01 | 0.82 | 1.25 | 9.07E-01 | T | 0.13 | G | 0.48 |
| rs762623   | CDKN1A    | 0.98 | 0.71 | 1.35 | 9.07E-01 | A | 0.08 | A | 0.14 |
| rs1799725  | SOD2      | 0.99 | 0.80 | 1.22 | 9.08E-01 | C | 0.40 | T | 0.49 |
| rs17274095 | BLM       | 0.98 | 0.74 | 1.30 | 9.08E-01 | A | 0.09 | A | 0.19 |
| rs1051741  | EPHX1     | 0.98 | 0.70 | 1.38 | 9.08E-01 | T | 0.11 | T | 0.10 |
| rs2070904  | CYP2D6    | 1.01 | 0.82 | 1.24 | 9.08E-01 | G | 0.36 | G | 0.46 |
| rs747657   | PARP1     | 0.99 | 0.80 | 1.22 | 9.08E-01 | C | 0.46 | G | 0.38 |
| rs1178027  | PTPRA     | 1.02 | 0.76 | 1.36 | 9.08E-01 | C | 0.45 | T | 0.10 |
| rs2368184  | ABI1      | 1.01 | 0.81 | 1.27 | 9.08E-01 | T | 0.21 | G | 0.45 |
| rs2664538  | MMP9      | 0.99 | 0.80 | 1.22 | 9.09E-01 | G | 0.34 | G | 0.37 |
| rs11574790 | IL12B     | 0.98 | 0.70 | 1.38 | 9.09E-01 | T | 0.18 | T | 0.10 |
| rs7312411  | VWF       | 1.01 | 0.81 | 1.27 | 9.10E-01 | A | 0.39 | G | 0.35 |
| rs35629    | ABCC1     | 0.98 | 0.72 | 1.33 | 9.10E-01 | T | 0.46 | T | 0.12 |
| rs3747258  | CERK      | 1.02 | 0.69 | 1.52 | 9.11E-01 | A | 0.35 | A | 0.04 |
| rs3136228  | MSH6      | 0.99 | 0.79 | 1.24 | 9.12E-01 | G | 0.22 | G | 0.35 |
| rs2185379  | PRDM1     | 0.97 | 0.55 | 1.69 | 9.12E-01 | A | 0.08 | A | 0.03 |
| rs1801320  | LOC729029 | 1.02 | 0.74 | 1.41 | 9.13E-01 | C | 0.24 | C | 0.09 |
| rs9885672  | FIG4      | 0.98 | 0.75 | 1.29 | 9.13E-01 | T | 0.30 | C | 0.17 |
| rs2069837  | IL6       | 0.98 | 0.65 | 1.46 | 9.14E-01 | G | 0.10 | G | 0.07 |
| rs2217332  | HERPUD1   | 1.02 | 0.76 | 1.36 | 9.14E-01 | T | 0.11 | T | 0.15 |
| rs1703874  | FLJ00290  | 0.99 | 0.78 | 1.25 | 9.14E-01 | A | 0.14 | A | 0.27 |
| rs1801702  | APOB      | 0.97 | 0.57 | 1.66 | 9.15E-01 | C | 0.09 | C | 0.03 |
| rs2645444  | FDFT1     | 0.99 | 0.75 | 1.29 | 9.15E-01 | G | 0.23 | G | 0.17 |
| rs3784932  | CHST5     | 0.99 | 0.75 | 1.29 | 9.16E-01 | C | 0.12 | C | 0.20 |
| rs963981   | KIAA1804  | 0.99 | 0.76 | 1.27 | 9.17E-01 | C | 0.18 | C | 0.20 |
| rs891507   | CDK5      | 0.98 | 0.73 | 1.33 | 9.18E-01 | T | 0.09 | T | 0.15 |
| rs2272615  | POLB      | 0.99 | 0.74 | 1.31 | 9.18E-01 | A | 0.36 | G | 0.12 |
| rs163081   | FAM82A    | 0.99 | 0.76 | 1.29 | 9.19E-01 | T | 0.24 | T | 0.22 |
| rs9462088  | FANCE     | 1.02 | 0.72 | 1.45 | 9.20E-01 | A | 0.37 | A | 0.06 |
| rs913118   | MGMT      | 1.01 | 0.82 | 1.25 | 9.20E-01 | C | 0.49 | T | 0.43 |
| rs4980999  | CAMKK2    | 1.01 | 0.77 | 1.33 | 9.21E-01 | A | 0.26 | A | 0.14 |
| rs2844482  | LTA       | 0.98 | 0.72 | 1.35 | 9.21E-01 | A | 0.10 | A | 0.13 |
| rs943975   | CYP2E1    | 1.02 | 0.74 | 1.40 | 9.21E-01 | C | 0.46 | C | 0.09 |
| rs1019731  | IGF1      | 0.98 | 0.71 | 1.37 | 9.22E-01 | T | 0.02 | T | 0.13 |
| rs1063045  | NBN       | 0.99 | 0.80 | 1.22 | 9.22E-01 | T | 0.30 | T | 0.33 |

|            |          |      |      |      |          |   |      |   |      |
|------------|----------|------|------|------|----------|---|------|---|------|
| rs3795374  | KIAA1804 | 0.99 | 0.77 | 1.27 | 9.23E-01 | A | 0.18 | A | 0.20 |
| rs1801249  | ATP7B    | 0.99 | 0.80 | 1.22 | 9.23E-01 | T | 0.44 | T | 0.41 |
| rs16900023 | C6orf26  | 1.03 | 0.52 | 2.06 | 9.23E-01 | T | 0.10 | T | 0.02 |
| rs7909236  | CYP2C8   | 0.99 | 0.76 | 1.28 | 9.23E-01 | T | 0.07 | T | 0.24 |
| rs2048426  | PARP1    | 1.01 | 0.82 | 1.25 | 9.23E-01 | C | 0.40 | T | 0.38 |
| rs662      | PON1     | 1.01 | 0.81 | 1.26 | 9.24E-01 | A | 0.33 | G | 0.34 |
| rs3213195  | BLM      | 1.01 | 0.78 | 1.32 | 9.24E-01 | G | 0.13 | G | 0.19 |
| rs6737156  | DGUOK    | 0.98 | 0.61 | 1.57 | 9.24E-01 | C | 0.16 | C | 0.04 |
| rs1934961  | CYP2C9   | 0.97 | 0.47 | 2.00 | 9.24E-01 | A | 0.16 | A | 0.00 |
| rs601391   | MRE11A   | 0.99 | 0.79 | 1.24 | 9.24E-01 | T | 0.41 | T | 0.31 |
| rs17612126 | IGHMBP2  | 1.01 | 0.79 | 1.29 | 9.24E-01 | A | 0.09 | A | 0.30 |
| rs2253635  | CYP2C9   | 1.01 | 0.81 | 1.26 | 9.25E-01 | G | 0.23 | G | 0.42 |
| rs1800378  | VWF      | 1.01 | 0.81 | 1.27 | 9.25E-01 | G | 0.21 | A | 0.35 |
| rs3806798  | IL15     | 0.98 | 0.69 | 1.40 | 9.25E-01 | T | 0.03 | T | 0.12 |
| rs17057718 | IL17RD   | 1.01 | 0.75 | 1.37 | 9.26E-01 | T | 0.04 | T | 0.18 |
| rs948516   | PGR      | 0.99 | 0.77 | 1.27 | 9.27E-01 | G | 0.10 | G | 0.30 |
| rs183374   | NFATC1   | 0.99 | 0.80 | 1.22 | 9.27E-01 | A | 0.33 | A | 0.45 |
| rs3219489  | MUTYH    | 1.01 | 0.80 | 1.28 | 9.27E-01 | C | 0.29 | C | 0.24 |
| rs2544773  | RIOK2    | 1.01 | 0.81 | 1.26 | 9.28E-01 | C | 0.12 | C | 0.41 |
| rs11550540 | TP53RK   | 1.02 | 0.69 | 1.51 | 9.28E-01 | G | 0.01 | G | 0.09 |
| rs2238136  | VDR      | 0.99 | 0.77 | 1.27 | 9.28E-01 | A | 0.10 | A | 0.25 |
| rs628031   | SLC22A1  | 1.01 | 0.82 | 1.25 | 9.28E-01 | A | 0.27 | A | 0.39 |
| rs800667   | CYP3A43  | 1.01 | 0.73 | 1.41 | 9.29E-01 | G | 0.45 | G | 0.08 |
| rs3014626  | PPP1R15B | 1.05 | 0.39 | 2.79 | 9.29E-01 | T | 0.07 | O | 0.00 |
| rs487989   | POLA2    | 0.99 | 0.74 | 1.32 | 9.30E-01 | A | 0.19 | A | 0.14 |
| rs1800802  | MGP      | 1.01 | 0.78 | 1.31 | 9.30E-01 | C | 0.04 | C | 0.20 |
| rs3795375  | KIAA1804 | 1.01 | 0.78 | 1.31 | 9.31E-01 | T | 0.13 | T | 0.20 |
| rs2276078  | HSPA8    | 1.04 | 0.43 | 2.51 | 9.32E-01 | G | 0.06 | G | 0.01 |
| rs12720356 | TYK2     | 0.98 | 0.67 | 1.45 | 9.33E-01 | G | 0.01 | G | 0.09 |
| rs1776148  | EXO1     | 1.01 | 0.81 | 1.25 | 9.33E-01 | A | 0.33 | A | 0.35 |
| rs1805011  | IL4R     | 0.99 | 0.74 | 1.31 | 9.34E-01 | A | 0.48 | C | 0.13 |
| rs9350     | EXO1     | 1.01 | 0.77 | 1.32 | 9.34E-01 | T | 0.14 | T | 0.19 |
| rs1024323  | GRK4     | 0.99 | 0.80 | 1.23 | 9.34E-01 | G | 0.42 | A | 0.39 |
| rs2725349  | WRN      | 1.01 | 0.81 | 1.26 | 9.35E-01 | C | 0.49 | C | 0.30 |
| rs1565684  | NAT2     | 1.01 | 0.82 | 1.24 | 9.36E-01 | C | 0.29 | T | 0.47 |
| rs7525957  | FRAP1    | 1.01 | 0.79 | 1.29 | 9.37E-01 | T | 0.35 | C | 0.25 |
| rs1803965  | MGMT     | 1.01 | 0.73 | 1.40 | 9.37E-01 | T | 0.19 | T | 0.13 |
| rs1469149  | CSF2     | 0.99 | 0.79 | 1.24 | 9.38E-01 | A | 0.49 | C | 0.34 |
| rs3771342  | UGT1A1   | 1.01 | 0.75 | 1.36 | 9.39E-01 | A | 0.15 | A | 0.15 |
| rs732774   | ATP7B    | 0.99 | 0.81 | 1.22 | 9.39E-01 | G | 0.46 | G | 0.41 |
| rs3817074  | BAX      | 1.01 | 0.73 | 1.41 | 9.40E-01 | T | 0.10 | T | 0.11 |
| rs4987876  | ATM      | 1.01 | 0.70 | 1.47 | 9.40E-01 | T | 0.06 | T | 0.10 |
| rs15524    | CYP3A5   | 0.99 | 0.71 | 1.37 | 9.41E-01 | T | 0.45 | C | 0.09 |
| rs2301241  | TXN      | 0.99 | 0.80 | 1.23 | 9.41E-01 | C | 0.42 | C | 0.39 |
| rs9282715  | IGF1R    | 1.01 | 0.70 | 1.47 | 9.42E-01 | C | 0.28 | C | 0.08 |
| rs1800795  | IL6      | 0.99 | 0.80 | 1.23 | 9.42E-01 | C | 0.08 | C | 0.38 |
| rs2292566  | EPHX1    | 1.01 | 0.75 | 1.36 | 9.43E-01 | A | 0.11 | A | 0.15 |
| rs930509   | MBL2     | 0.99 | 0.74 | 1.32 | 9.43E-01 | C | 0.11 | C | 0.18 |
| rs4525     | F5       | 0.99 | 0.77 | 1.27 | 9.43E-01 | G | 0.15 | G | 0.26 |
| rs9306354  | XRCC6    | 0.98 | 0.54 | 1.77 | 9.43E-01 | T | 0.24 | T | 0.00 |

|            |              |      |      |      |          |   |      |   |      |
|------------|--------------|------|------|------|----------|---|------|---|------|
| rs4655537  | LEPR         | 1.01 | 0.81 | 1.25 | 9.44E-01 | A | 0.37 | A | 0.36 |
| rs1678339  | ABCC4        | 0.99 | 0.65 | 1.49 | 9.44E-01 | T | 0.17 | T | 0.06 |
| rs1800872  | IL10         | 0.99 | 0.78 | 1.26 | 9.44E-01 | A | 0.38 | A | 0.26 |
| rs4149272  | ABCA1        | 0.99 | 0.80 | 1.24 | 9.45E-01 | G | 0.25 | A | 0.38 |
| rs4762     | AGT          | 0.99 | 0.70 | 1.39 | 9.45E-01 | T | 0.06 | T | 0.13 |
| rs1058172  | CYP2D6       | 1.01 | 0.73 | 1.41 | 9.45E-01 | A | 0.03 | A | 0.15 |
| rs4665766  | EFR3B        | 1.01 | 0.79 | 1.28 | 9.46E-01 | T | 0.39 | T | 0.24 |
| rs854569   | PON1         | 1.01 | 0.80 | 1.27 | 9.47E-01 | G | 0.32 | T | 0.24 |
| rs2234898  | IL4R         | 0.99 | 0.75 | 1.31 | 9.47E-01 | G | 0.48 | T | 0.13 |
| rs16932374 | VWF          | 1.02 | 0.52 | 2.02 | 9.48E-01 | T | 0.16 | T | 0.00 |
| rs4524     | F5           | 0.99 | 0.78 | 1.27 | 9.49E-01 | G | 0.16 | G | 0.27 |
| rs17841292 | EEF2K        | 0.99 | 0.66 | 1.47 | 9.49E-01 | G | 0.03 | G | 0.09 |
| rs2580874  | AICDA        | 0.99 | 0.81 | 1.22 | 9.49E-01 | G | 0.30 | A | 0.47 |
| rs3087243  | CTLA4        | 1.01 | 0.80 | 1.26 | 9.50E-01 | A | 0.21 | A | 0.41 |
| rs3136664  | CCR1         | 0.97 | 0.40 | 2.37 | 9.50E-01 | A | 0.08 | A | 0.00 |
| rs2243828  | MPO          | 1.01 | 0.79 | 1.29 | 9.51E-01 | G | 0.38 | G | 0.22 |
| rs2585     | IGF2         | 1.01 | 0.80 | 1.27 | 9.51E-01 | T | 0.10 | T | 0.29 |
| rs2608555  | GAN          | 1.01 | 0.79 | 1.29 | 9.52E-01 | T | 0.18 | T | 0.25 |
| rs2303425  | MSH2         | 1.01 | 0.72 | 1.41 | 9.52E-01 | C | 0.02 | C | 0.13 |
| rs888580   | ADRB3        | 1.01 | 0.81 | 1.25 | 9.53E-01 | A | 0.24 | A | 0.37 |
| rs3212948  | ERCC1        | 0.99 | 0.80 | 1.24 | 9.53E-01 | C | 0.13 | G | 0.38 |
| rs1063856  | VWF          | 0.99 | 0.80 | 1.23 | 9.53E-01 | A | 0.40 | G | 0.34 |
| rs12347    | MTRR         | 1.01 | 0.73 | 1.40 | 9.53E-01 | T | 0.32 | T | 0.11 |
| rs3826007  | BCL2A1       | 1.01 | 0.79 | 1.28 | 9.54E-01 | A | 0.09 | A | 0.27 |
| rs305968   | CYP2F1       | 0.99 | 0.79 | 1.24 | 9.55E-01 | G | 0.41 | A | 0.31 |
| rs2850992  | PPP3CA       | 1.01 | 0.79 | 1.29 | 9.55E-01 | C | 0.05 | C | 0.31 |
| rs3136717  | POLB         | 0.99 | 0.74 | 1.32 | 9.56E-01 | T | 0.34 | C | 0.12 |
| rs1063147  | BLM          | 0.99 | 0.75 | 1.31 | 9.56E-01 | T | 0.08 | T | 0.19 |
| rs2659543  | PPP3CA       | 0.99 | 0.64 | 1.52 | 9.56E-01 | G | 0.37 | G | 0.06 |
| rs3850751  | NAT1         | 0.99 | 0.80 | 1.24 | 9.57E-01 | C | 0.18 | C | 0.43 |
| rs168351   | ALDH1A1      | 1.01 | 0.75 | 1.35 | 9.58E-01 | G | 0.02 | G | 0.16 |
| rs513349   | BAK1         | 1.01 | 0.82 | 1.24 | 9.58E-01 | A | 0.33 | G | 0.42 |
| rs152029   | ABCC1        | 0.99 | 0.75 | 1.32 | 9.59E-01 | T | 0.49 | G | 0.12 |
| rs1051061  | VRK2         | 1.01 | 0.80 | 1.26 | 9.59E-01 | G | 0.08 | G | 0.36 |
| rs4925     | GSTO1        | 1.01 | 0.79 | 1.28 | 9.59E-01 | A | 0.12 | A | 0.29 |
| rs2274578  | BYSL         | 1.01 | 0.81 | 1.24 | 9.59E-01 | G | 0.36 | C | 0.50 |
| rs8659     | MTRR         | 0.99 | 0.78 | 1.26 | 9.60E-01 | T | 0.45 | T | 0.35 |
| rs2274760  | GSTA4        | 0.99 | 0.71 | 1.38 | 9.62E-01 | C | 0.02 | C | 0.11 |
| rs1035130  | IL18R1       | 1.01 | 0.79 | 1.27 | 9.62E-01 | A | 0.17 | A | 0.27 |
| rs2908004  | WNT16        | 1.01 | 0.81 | 1.25 | 9.63E-01 | C | 0.17 | T | 0.44 |
| rs2069456  | CDK5         | 0.99 | 0.79 | 1.25 | 9.64E-01 | C | 0.26 | C | 0.25 |
| rs10017300 | Intergenic   | 0.99 | 0.79 | 1.26 | 9.64E-01 | C | 0.19 | C | 0.31 |
| rs17057901 | PBK          | 1.02 | 0.37 | 2.87 | 9.64E-01 | G | 0.07 | G | 0.00 |
| rs1040090  | DPYD         | 1.01 | 0.75 | 1.34 | 9.65E-01 | A | 0.10 | A | 0.16 |
| rs1263167  | APOA5        | 1.01 | 0.75 | 1.35 | 9.65E-01 | G | 0.06 | G | 0.19 |
| rs3093873  | LOC100132444 | 1.01 | 0.72 | 1.41 | 9.66E-01 | C | 0.38 | T | 0.05 |
| rs13339152 | RUNDC2A      | 0.99 | 0.70 | 1.41 | 9.66E-01 | C | 0.28 | C | 0.07 |
| rs3802762  | CHST1        | 0.99 | 0.76 | 1.30 | 9.66E-01 | C | 0.45 | T | 0.16 |
| rs3749229  | CHRD         | 1.01 | 0.72 | 1.42 | 9.66E-01 | A | 0.16 | A | 0.12 |
| rs16944831 | BLM          | 0.99 | 0.67 | 1.46 | 9.67E-01 | T | 0.32 | T | 0.04 |

|            |          |      |      |      |          |   |      |   |      |
|------------|----------|------|------|------|----------|---|------|---|------|
| rs7926138  | MRE11A   | 1.01 | 0.60 | 1.71 | 9.67E-01 | A | 0.26 | A | 0.01 |
| rs1800871  | IL10     | 1.01 | 0.79 | 1.28 | 9.67E-01 | T | 0.38 | T | 0.26 |
| rs1126643  | ITGA2    | 1.00 | 0.81 | 1.24 | 9.67E-01 | T | 0.29 | T | 0.40 |
| rs26784    | MSH3     | 1.00 | 0.79 | 1.25 | 9.69E-01 | C | 0.23 | C | 0.40 |
| rs1333728  | DPYD     | 0.99 | 0.68 | 1.46 | 9.70E-01 | T | 0.02 | T | 0.09 |
| rs1805414  | PARP1    | 1.00 | 0.81 | 1.23 | 9.70E-01 | T | 0.46 | C | 0.38 |
| rs1800471  | TGFB1    | 1.01 | 0.66 | 1.55 | 9.70E-01 | C | 0.06 | C | 0.07 |
| rs554715   | MRE11A   | 1.00 | 0.80 | 1.25 | 9.71E-01 | C | 0.40 | C | 0.31 |
| rs2470890  | CYP1A2   | 1.00 | 0.80 | 1.25 | 9.71E-01 | T | 0.12 | C | 0.41 |
| rs17420378 | STK4     | 1.00 | 0.79 | 1.28 | 9.72E-01 | A | 0.14 | A | 0.29 |
| rs3747806  | ABCB4    | 1.01 | 0.64 | 1.58 | 9.72E-01 | C | 0.20 | C | 0.04 |
| rs928169   | ATP7B    | 1.00 | 0.82 | 1.23 | 9.72E-01 | C | 0.49 | C | 0.41 |
| rs17098707 | GRK5     | 0.99 | 0.58 | 1.68 | 9.72E-01 | T | 0.27 | T | 0.01 |
| rs2046136  | BCL2     | 1.00 | 0.79 | 1.27 | 9.72E-01 | C | 0.20 | C | 0.29 |
| rs5936     | PROC     | 1.00 | 0.80 | 1.26 | 9.72E-01 | G | 0.25 | G | 0.29 |
| rs1062633  | MST1R    | 1.00 | 0.80 | 1.24 | 9.73E-01 | A | 0.32 | G | 0.49 |
| rs868891   | MON1A    | 1.00 | 0.80 | 1.24 | 9.73E-01 | C | 0.26 | C | 0.41 |
| rs2239704  | LTA      | 1.00 | 0.81 | 1.25 | 9.73E-01 | T | 0.31 | T | 0.37 |
| rs3776969  | MSH3     | 0.99 | 0.71 | 1.39 | 9.73E-01 | A | 0.18 | A | 0.09 |
| rs10018280 | PDE5A    | 1.00 | 0.80 | 1.25 | 9.75E-01 | G | 0.34 | G | 0.30 |
| rs8827     | SPRED2   | 1.00 | 0.78 | 1.28 | 9.75E-01 | C | 0.15 | C | 0.28 |
| rs1635498  | EXO1     | 0.99 | 0.59 | 1.67 | 9.77E-01 | G | 0.09 | G | 0.03 |
| rs6949295  | IMPDH1   | 1.00 | 0.78 | 1.28 | 9.78E-01 | C | 0.30 | C | 0.23 |
| rs919766   | IL12B    | 1.00 | 0.71 | 1.39 | 9.78E-01 | C | 0.20 | C | 0.10 |
| rs4905475  | BDKRB1   | 1.01 | 0.69 | 1.46 | 9.79E-01 | C | 0.02 | C | 0.10 |
| rs11595876 | MBL2     | 0.99 | 0.63 | 1.58 | 9.79E-01 | C | 0.01 | C | 0.06 |
| rs2274736  | PTPN21   | 1.00 | 0.80 | 1.25 | 9.79E-01 | C | 0.47 | C | 0.34 |
| rs3743527  | ABCC1    | 1.00 | 0.76 | 1.32 | 9.79E-01 | T | 0.15 | T | 0.21 |
| rs3217772  | CCNA2    | 1.00 | 0.80 | 1.25 | 9.80E-01 | C | 0.10 | C | 0.40 |
| rs2070874  | IL4      | 1.00 | 0.78 | 1.30 | 9.80E-01 | T | 0.40 | T | 0.18 |
| rs1124     | BMP1     | 1.00 | 0.77 | 1.31 | 9.80E-01 | A | 0.14 | A | 0.32 |
| rs2298037  | CYP2C9   | 1.00 | 0.74 | 1.36 | 9.80E-01 | T | 0.05 | T | 0.17 |
| rs2227631  | SERPINE1 | 1.00 | 0.80 | 1.25 | 9.80E-01 | A | 0.28 | G | 0.43 |
| rs3762412  | DPYD     | 1.00 | 0.80 | 1.25 | 9.81E-01 | T | 0.08 | T | 0.36 |
| rs5182     | AGTR1    | 1.00 | 0.81 | 1.24 | 9.81E-01 | T | 0.19 | T | 0.48 |
| rs6482573  | PDSS1    | 1.00 | 0.81 | 1.25 | 9.82E-01 | G | 0.30 | A | 0.37 |
| rs886205   | ALDH2    | 1.00 | 0.77 | 1.31 | 9.82E-01 | T | 0.40 | C | 0.21 |
| rs769243   | CCNA2    | 0.99 | 0.63 | 1.57 | 9.82E-01 | A | 0.40 | A | 0.02 |
| rs436525   | ADAMTS1  | 1.00 | 0.81 | 1.23 | 9.82E-01 | G | 0.36 | G | 0.33 |
| rs3130618  | BAT4     | 1.00 | 0.78 | 1.29 | 9.83E-01 | A | 0.22 | A | 0.22 |
| rs2229765  | IGF1R    | 1.00 | 0.81 | 1.24 | 9.83E-01 | A | 0.26 | A | 0.42 |
| rs1536474  | RXRA     | 1.00 | 0.77 | 1.30 | 9.84E-01 | G | 0.31 | T | 0.25 |
| rs16905649 | PTPRJ    | 1.01 | 0.41 | 2.46 | 9.85E-01 | A | 0.09 | A | 0.00 |
| rs2230517  | MERTK    | 1.00 | 0.61 | 1.62 | 9.85E-01 | A | 0.19 | A | 0.03 |
| rs954619   | CCND1    | 1.01 | 0.55 | 1.83 | 9.86E-01 | T | 0.13 | T | 0.01 |
| rs1799969  | ICAM1    | 1.00 | 0.72 | 1.39 | 9.86E-01 | A | 0.03 | A | 0.12 |
| rs1760217  | DPYD     | 1.00 | 0.78 | 1.29 | 9.87E-01 | C | 0.17 | C | 0.23 |
| rs2401751  | PTPN21   | 1.00 | 0.80 | 1.25 | 9.87E-01 | T | 0.35 | T | 0.34 |
| rs1805312  | ALAD     | 1.00 | 0.67 | 1.51 | 9.88E-01 | C | 0.02 | C | 0.09 |
| rs827528   | FZD6     | 1.00 | 0.78 | 1.29 | 9.88E-01 | G | 0.19 | G | 0.23 |

|            |              |      |      |      |          |   |      |   |      |
|------------|--------------|------|------|------|----------|---|------|---|------|
| rs1760216  | DPYD         | 1.00 | 0.76 | 1.31 | 9.88E-01 | A | 0.10 | A | 0.20 |
| rs2011713  | PCGF2        | 1.00 | 0.65 | 1.53 | 9.88E-01 | A | 0.02 | A | 0.08 |
| rs956868   | WNK1         | 1.00 | 0.75 | 1.34 | 9.89E-01 | A | 0.17 | A | 0.16 |
| rs246      | OPCML        | 1.00 | 0.78 | 1.27 | 9.89E-01 | A | 0.21 | A | 0.22 |
| rs1051332  | ATP7B        | 1.00 | 0.80 | 1.24 | 9.90E-01 | A | 0.15 | A | 0.46 |
| rs3135506  | APOA5        | 1.00 | 0.64 | 1.56 | 9.91E-01 | C | 0.06 | C | 0.07 |
| rs476632   | HSP90AB1     | 1.00 | 0.80 | 1.25 | 9.91E-01 | A | 0.17 | A | 0.34 |
| rs3917991  | CSF3R        | 1.00 | 0.55 | 1.82 | 9.92E-01 | C | 0.16 | C | 0.01 |
| rs9282612  | BLM          | 1.00 | 0.76 | 1.32 | 9.92E-01 | G | 0.09 | G | 0.19 |
| rs3219090  | PARP1        | 1.00 | 0.81 | 1.23 | 9.92E-01 | G | 0.45 | A | 0.37 |
| rs9333269  | ITGA8        | 1.00 | 0.68 | 1.48 | 9.92E-01 | C | 0.01 | C | 0.09 |
| rs11632706 | CYP1A2       | 1.00 | 0.60 | 1.65 | 9.93E-01 | T | 0.10 | T | 0.04 |
| rs1042579  | THBD         | 1.00 | 0.75 | 1.34 | 9.93E-01 | T | 0.04 | T | 0.19 |
| rs2069526  | CYP1A2       | 1.00 | 0.60 | 1.65 | 9.93E-01 | G | 0.10 | G | 0.04 |
| rs2056048  | DPYD         | 1.00 | 0.81 | 1.23 | 9.94E-01 | C | 0.33 | A | 0.49 |
| rs1165678  | HSP90B1      | 1.00 | 0.81 | 1.23 | 9.94E-01 | G | 0.26 | G | 0.38 |
| rs3136794  | POLB         | 1.00 | 0.75 | 1.33 | 9.94E-01 | A | 0.37 | G | 0.12 |
| rs505770   | MMP12        | 1.00 | 0.65 | 1.54 | 9.95E-01 | A | 0.27 | A | 0.04 |
| rs9332     | MTRR         | 1.00 | 0.72 | 1.38 | 9.95E-01 | T | 0.32 | T | 0.11 |
| rs1042482  | DPYD         | 1.00 | 0.68 | 1.46 | 9.95E-01 | A | 0.03 | A | 0.09 |
| rs1530662  | FBXO25       | 1.00 | 0.81 | 1.24 | 9.95E-01 | T | 0.20 | C | 0.44 |
| rs1042580  | THBD         | 1.00 | 0.80 | 1.25 | 9.95E-01 | G | 0.22 | G | 0.38 |
| rs993568   | DPYD         | 1.00 | 0.81 | 1.23 | 9.95E-01 | G | 0.33 | A | 0.49 |
| rs1641536  | SHBG         | 1.00 | 0.76 | 1.31 | 9.96E-01 | G | 0.48 | A | 0.14 |
| rs228843   | NFATC2       | 1.00 | 0.80 | 1.24 | 9.96E-01 | G | 0.26 | A | 0.42 |
| rs2760501  | JUN          | 1.00 | 0.72 | 1.38 | 9.96E-01 | T | 0.28 | G | 0.09 |
| rs867186   | PROCR        | 1.00 | 0.70 | 1.43 | 9.96E-01 | G | 0.09 | G | 0.11 |
| rs162036   | MTRR         | 1.00 | 0.72 | 1.38 | 9.96E-01 | G | 0.32 | G | 0.11 |
| rs3204953  | LOC100128477 | 1.00 | 0.71 | 1.42 | 9.96E-01 | A | 0.02 | A | 0.13 |
| rs3802265  | ZHX2         | 1.00 | 0.80 | 1.25 | 9.98E-01 | C | 0.45 | C | 0.37 |
| rs4303     | ACE          | 1.00 | 0.35 | 2.84 | 9.98E-01 | T | 0.09 | T | 0.00 |
| rs1799800  | ERCC4        | 1.00 | 0.79 | 1.27 | 9.98E-01 | A | 0.19 | A | 0.26 |
| rs2602376  | UGT1A10      | 1.00 | 0.77 | 1.29 | 9.99E-01 | T | 0.07 | T | 0.28 |
| rs3759217  | CDKN1B       | 1.00 | 0.72 | 1.40 | 1.00E+00 | T | 0.06 | T | 0.12 |
