# Supplementary material
Source: PubMed Central journal article supplement (PMC3647022)
Supplement: NIHMS429103-supplement-Supp_Table_S2.pdf [file NIHMS429103-supplement-Supp_Table_S2.pdf]

## Supplemental Table 2

SNPs associated with severity of ct-scores (chronic tubular atrophy) using an adjusted multinomial logistic regression with 3 outcome groups, ct score  $\geq 2$  (n=52), ct-score  $\leq 1$  (n=195) and no biopsy group (n=687). SNPs are ranked by p-values for the ct $\geq 2$  versus ct $\leq 1$  groups. The model was adjusted for SPK versus kidney alone, donor age, recipient age, recipient African American race, and baseline creatinine at 3 months post-transplant, smoking status and steroid withdrawal status at 14 days post-transplant.

| SNP       | Gene    | Allele | Freq  | ct $\leq 1$<br>vs no<br>biopsy<br>OR | ct $\leq 1$ vs no<br>biopsy 95%<br>C.I. | ct $\leq 1$<br>vs no<br>biopsy<br>Pvalue | ct $\geq 2$<br>vs no<br>biopsy<br>OR | ct $\geq 2$ vs no<br>biopsy 95% C.I. | ct $\geq 2$<br>vs no<br>biopsy<br>Pvalue | ct $\geq 2$<br>vs<br>ct $\leq 1$<br>OR | ct $\geq 2$ vs ct $\leq 1$<br>95% C.I. | ct $\geq 2$<br>vs<br>ct $\leq 1$<br>Pvalue | Overall<br>Pvalue |
|-----------|---------|--------|-------|--------------------------------------|-----------------------------------------|------------------------------------------|--------------------------------------|--------------------------------------|------------------------------------------|----------------------------------------|----------------------------------------|--------------------------------------------|-------------------|
| rs8179183 | LEPR    | C      | 0.172 | 0.927                                | [0.669,1.284]                           | 0.649                                    | 2.474                                | [1.501,4.076]                        | <0.001                                   | 2.668                                  | [1.538,4.627]                          | <0.001                                     | 0.001             |
| rs3828034 | LEPR    | C      | 0.146 | 0.894                                | [0.634,1.261]                           | 0.524                                    | 2.447                                | [1.452,4.124]                        | 0.001                                    | 2.736                                  | [1.537,4.873]                          | 0.001                                      | 0.002             |
| rs593421  | CYP4F12 | C      | 0.287 | 1.450                                | [1.112,1.891]                           | 0.006                                    | 0.550                                | [0.317,0.955]                        | 0.034                                    | 0.379                                  | [0.211,0.68]                           | 0.001                                      | 0.001             |
| rs491347  | LRP5    | C      | 0.299 | 0.884                                | [0.674,1.158]                           | 0.370                                    | 1.940                                | [1.245,3.022]                        | 0.003                                    | 2.195                                  | [1.35,3.57]                            | 0.002                                      | 0.006             |
| rs2853559 | VDR     | T      | 0.350 | 1.115                                | [0.861,1.444]                           | 0.411                                    | 0.454                                | [0.267,0.774]                        | 0.004                                    | 0.408                                  | [0.232,0.717]                          | 0.002                                      | 0.008             |
| rs2238136 | VDR     | A      | 0.221 | 0.850                                | [0.636,1.136]                           | 0.273                                    | 1.873                                | [1.192,2.944]                        | 0.007                                    | 2.203                                  | [1.337,3.63]                           | 0.002                                      | 0.008             |
| rs667126  | LRP5    | C      | 0.293 | 0.898                                | [0.685,1.178]                           | 0.437                                    | 1.947                                | [1.244,3.049]                        | 0.004                                    | 2.168                                  | [1.328,3.539]                          | 0.002                                      | 0.007             |
| rs875444  | RXRA    | G      | 0.475 | 1.180                                | [0.914,1.523]                           | 0.204                                    | 0.519                                | [0.317,0.851]                        | 0.009                                    | 0.440                                  | [0.26,0.746]                           | 0.002                                      | 0.009             |
| rs2306862 | LRP5    | T      | 0.139 | 0.974                                | [0.687,1.379]                           | 0.880                                    | 2.380                                | [1.42,3.989]                         | 0.001                                    | 2.444                                  | [1.376,4.344]                          | 0.002                                      | 0.004             |
| rs7533315 | MTHFR   | T      | 0.267 | 1.133                                | [0.88,1.457]                            | 0.332                                    | 2.297                                | [1.508,3.499]                        | <0.001                                   | 2.028                                  | [1.286,3.197]                          | 0.002                                      | 0.001             |
| rs688755  | CYP4F12 | C      | 0.289 | 1.394                                | [1.079,1.801]                           | 0.011                                    | 0.577                                | [0.337,0.989]                        | 0.045                                    | 0.414                                  | [0.235,0.73]                           | 0.002                                      | 0.003             |
| rs2237580 | PON1    | G      | 0.104 | 0.415                                | [0.255,0.676]                           | 0.000                                    | 1.297                                | [0.696,2.416]                        | 0.413                                    | 3.122                                  | [1.486,6.561]                          | 0.003                                      | 0.001             |
| rs2955617 | SHBG    | G      | 0.407 | 1.151                                | [0.902,1.469]                           | 0.259                                    | 0.519                                | [0.317,0.849]                        | 0.009                                    | 0.451                                  | [0.267,0.759]                          | 0.003                                      | 0.011             |
| rs915057  | SYNE2   | T      | 0.380 | 0.866                                | [0.674,1.111]                           | 0.257                                    | 1.797                                | [1.152,2.804]                        | 0.010                                    | 2.077                                  | [1.284,3.357]                          | 0.003                                      | 0.012             |
| rs2066471 | MTHFR   | A      | 0.155 | 1.042                                | [0.767,1.415]                           | 0.792                                    | 2.293                                | [1.427,3.685]                        | 0.001                                    | 2.201                                  | [1.309,3.699]                          | 0.003                                      | 0.003             |
| rs6637    | GSTZ1   | G      | 0.358 | 0.825                                | [0.64,1.064]                            | 0.139                                    | 1.719                                | [1.097,2.692]                        | 0.018                                    | 2.082                                  | [1.28,3.386]                           | 0.003                                      | 0.012             |
| rs4752904 | PTPRJ   | C      | 0.484 | 0.863                                | [0.681,1.095]                           | 0.227                                    | 1.805                                | [1.141,2.855]                        | 0.012                                    | 2.090                                  | [1.281,3.411]                          | 0.003                                      | 0.013             |
| rs2249317 | SIRPD   | T      | 0.157 | 0.852                                | [0.613,1.184]                           | 0.341                                    | 1.931                                | [1.184,3.148]                        | 0.008                                    | 2.266                                  | [1.313,3.912]                          | 0.003                                      | 0.012             |
| rs2243828 | MPO     | G      | 0.245 | 0.820                                | [0.615,1.092]                           | 0.174                                    | 1.677                                | [1.073,2.623]                        | 0.023                                    | 2.046                                  | [1.246,3.36]                           | 0.005                                      | 0.018             |
| rs2071746 | HMOX1   | T      | 0.455 | 0.955                                | [0.747,1.221]                           | 0.715                                    | 1.913                                | [1.218,3.005]                        | 0.005                                    | 2.002                                  | [1.235,3.246]                          | 0.005                                      | 0.014             |
| rs1042713 | ADRB2   | A      | 0.394 | 0.972                                | [0.762,1.238]                           | 0.817                                    | 0.458                                | [0.279,0.752]                        | 0.002                                    | 0.471                                  | [0.279,0.796]                          | 0.005                                      | 0.008             |
| rs2070744 | NOS3    | C      | 0.310 | 0.874                                | [0.673,1.135]                           | 0.314                                    | 1.759                                | [1.12,2.761]                         | 0.014                                    | 2.011                                  | [1.233,3.282]                          | 0.005                                      | 0.020             |
| rs1801157 | CXCL12  | A      | 0.164 | 0.752                                | [0.536,1.055]                           | 0.099                                    | 1.704                                | [1.012,2.87]                         | 0.045                                    | 2.265                                  | [1.265,4.056]                          | 0.006                                      | 0.021             |
| rs4455491 | UGT2B7  | A      | 0.460 | 0.879                                | [0.69,1.119]                            | 0.293                                    | 1.693                                | [1.097,2.614]                        | 0.017                                    | 1.927                                  | [1.206,3.079]                          | 0.006                                      | 0.023             |
| rs7438135 | UGT2B7  | G      | 0.463 | 0.879                                | [0.691,1.118]                           | 0.293                                    | 1.672                                | [1.084,2.578]                        | 0.020                                    | 1.902                                  | [1.192,3.034]                          | 0.007                                      | 0.026             |
| rs7668258 | UGT2B7  | T      | 0.463 | 0.879                                | [0.691,1.118]                           | 0.293                                    | 1.672                                | [1.084,2.578]                        | 0.020                                    | 1.902                                  | [1.192,3.034]                          | 0.007                                      | 0.026             |
| rs4554144 | UGT2B7  | C      | 0.462 | 0.887                                | [0.69,1.14]                             | 0.348                                    | 1.708                                | [1.1,2.651]                          | 0.017                                    | 1.926                                  | [1.195,3.105]                          | 0.007                                      | 0.026             |
| rs7662029 | UGT2B7  | A      | 0.463 | 0.882                                | [0.693,1.121]                           | 0.304                                    | 1.674                                | [1.086,2.582]                        | 0.020                                    | 1.899                                  | [1.19,3.031]                           | 0.007                                      | 0.027             |
| rs2271922 | MEIS2   | C      | 0.081 | 1.359                                | [0.867,2.129]                           | 0.181                                    | 0.079                                | [0.01,0.618]                         | 0.016                                    | 0.058                                  | [0.007,0.468]                          | 0.007                                      | 0.019             |
| rs4364327 | UGT2B7  | C      | 0.453 | 0.850                                | [0.667,1.083]                           | 0.188                                    | 1.600                                | [1.038,2.467]                        | 0.033                                    | 1.883                                  | [1.179,3.006]                          | 0.008                                      | 0.029             |
| rs487989  | POLA2   | A      | 0.153 | 0.990                                | [0.71,1.38]                             | 0.954                                    | 1.997                                | [1.259,3.168]                        | 0.003                                    | 2.017                                  | [1.2,3.39]                             | 0.008                                      | 0.011             |

|            |         |   |       |       |               |       |       |               |       |       |               |       |       |
|------------|---------|---|-------|-------|---------------|-------|-------|---------------|-------|-------|---------------|-------|-------|
| rs4588522  | UGT2B7  | C | 0.455 | 0.844 | [0.663,1.075] | 0.169 | 1.582 | [1.029,2.433] | 0.037 | 1.875 | [1.177,2.987] | 0.008 | 0.028 |
| rs4337789  | UGT2B7  | A | 0.454 | 0.854 | [0.67,1.089]  | 0.204 | 1.601 | [1.039,2.466] | 0.033 | 1.873 | [1.173,2.991] | 0.009 | 0.031 |
| rs582054   | IL12A   | A | 0.429 | 1.048 | [0.826,1.329] | 0.701 | 0.534 | [0.332,0.86]  | 0.010 | 0.510 | [0.308,0.845] | 0.009 | 0.028 |
| rs630303   | MUS81   | G | 0.419 | 1.433 | [1.123,1.829] | 0.004 | 0.746 | [0.472,1.18]  | 0.211 | 0.521 | [0.319,0.85]  | 0.009 | 0.004 |
| rs458017   | REV3L   | C | 0.061 | 0.867 | [0.514,1.462] | 0.592 | 2.443 | [1.245,4.794] | 0.009 | 2.818 | [1.288,6.168] | 0.010 | 0.021 |
| rs2227314  | IL12A   | G | 0.433 | 1.029 | [0.812,1.306] | 0.811 | 0.533 | [0.333,0.852] | 0.009 | 0.517 | [0.314,0.852] | 0.010 | 0.027 |
| rs4150474  | ERCC3   | G | 0.286 | 0.733 | [0.557,0.964] | 0.026 | 1.400 | [0.898,2.183] | 0.137 | 1.911 | [1.17,3.121]  | 0.010 | 0.017 |
| rs11940316 | UGT2B7  | T | 0.463 | 0.879 | [0.692,1.118] | 0.294 | 1.628 | [1.053,2.517] | 0.028 | 1.851 | [1.157,2.961] | 0.010 | 0.037 |
| rs582537   | IL12A   | A | 0.429 | 1.046 | [0.825,1.326] | 0.712 | 0.544 | [0.34,0.87]   | 0.011 | 0.520 | [0.315,0.856] | 0.010 | 0.031 |
| rs10735510 | ATF3    | C | 0.434 | 0.913 | [0.721,1.156] | 0.450 | 1.664 | [1.084,2.557] | 0.020 | 1.823 | [1.15,2.888]  | 0.011 | 0.037 |
| rs7441750  | UGT2B7  | G | 0.472 | 0.938 | [0.733,1.2]   | 0.610 | 1.742 | [1.12,2.711]  | 0.014 | 1.858 | [1.152,2.995] | 0.011 | 0.034 |
| rs3802762  | CHST1   | T | 0.231 | 1.303 | [0.976,1.741] | 0.073 | 0.589 | [0.331,1.049] | 0.073 | 0.452 | [0.245,0.835] | 0.011 | 0.026 |
| rs1256061  | ESR2    | A | 0.435 | 0.991 | [0.785,1.252] | 0.943 | 0.532 | [0.336,0.842] | 0.007 | 0.536 | [0.329,0.874] | 0.012 | 0.025 |
| rs607887   | LRP5    | T | 0.351 | 0.812 | [0.633,1.042] | 0.102 | 1.466 | [0.956,2.247] | 0.079 | 1.804 | [1.134,2.871] | 0.013 | 0.036 |
| rs3177429  | GSTZ1   | A | 0.075 | 0.672 | [0.411,1.1]   | 0.114 | 1.831 | [0.924,3.625] | 0.083 | 2.722 | [1.237,5.99]  | 0.013 | 0.042 |
| rs8030950  | IGF1R   | A | 0.310 | 1.014 | [0.789,1.302] | 0.916 | 1.814 | [1.188,2.772] | 0.006 | 1.790 | [1.131,2.834] | 0.013 | 0.021 |
| rs2602376  | UGT1A10 | T | 0.244 | 0.851 | [0.631,1.147] | 0.289 | 1.680 | [1.028,2.745] | 0.038 | 1.974 | [1.152,3.383] | 0.013 | 0.047 |
| rs2274406  | ABCC4   | T | 0.399 | 0.844 | [0.655,1.088] | 0.191 | 1.539 | [0.991,2.391] | 0.055 | 1.823 | [1.13,2.94]   | 0.014 | 0.046 |
| rs2097461  | XBP1    | C | 0.354 | 0.837 | [0.652,1.073] | 0.160 | 1.483 | [0.975,2.254] | 0.065 | 1.772 | [1.122,2.797] | 0.014 | 0.045 |
| rs2056822  | CYP4F8  | A | 0.263 | 0.941 | [0.718,1.233] | 0.657 | 1.742 | [1.102,2.755] | 0.018 | 1.853 | [1.126,3.047] | 0.015 | 0.044 |
| rs1800468  | B9D2    | A | 0.076 | 1.020 | [0.651,1.6]   | 0.931 | 2.451 | [1.307,4.596] | 0.005 | 2.403 | [1.184,4.876] | 0.015 | 0.019 |
| rs6030     | F5      | G | 0.301 | 0.848 | [0.651,1.105] | 0.223 | 1.558 | [0.991,2.448] | 0.055 | 1.837 | [1.124,3.002] | 0.015 | 0.051 |
| rs1799793  | ERCC2   | A | 0.301 | 0.845 | [0.656,1.09]  | 0.195 | 1.522 | [0.982,2.357] | 0.060 | 1.800 | [1.12,2.892]  | 0.015 | 0.050 |
| rs2368184  | ABI1    | T | 0.492 | 0.766 | [0.595,0.986] | 0.039 | 1.411 | [0.888,2.241] | 0.145 | 1.841 | [1.12,3.027]  | 0.016 | 0.026 |
| rs3788409  | XBP1    | G | 0.354 | 0.839 | [0.652,1.078] | 0.170 | 1.475 | [0.966,2.251] | 0.072 | 1.758 | [1.109,2.788] | 0.016 | 0.052 |
| rs11421    | FCER1G  | C | 0.148 | 0.923 | [0.659,1.294] | 0.644 | 1.873 | [1.112,3.154] | 0.018 | 2.028 | [1.138,3.613] | 0.016 | 0.044 |
| rs3776432  | NSUN2   | A | 0.323 | 1.010 | [0.787,1.297] | 0.935 | 1.756 | [1.15,2.681]  | 0.009 | 1.738 | [1.099,2.747] | 0.018 | 0.032 |
| rs1802061  | GSTA4   | A | 0.048 | 0.507 | [0.26,0.987]  | 0.046 | 1.612 | [0.739,3.514] | 0.230 | 3.179 | [1.217,8.302] | 0.018 | 0.047 |
| rs608343   | LRP5    | G | 0.365 | 0.832 | [0.648,1.068] | 0.149 | 1.460 | [0.95,2.244]  | 0.084 | 1.756 | [1.1,2.802]   | 0.018 | 0.054 |
| rs1256063  | ESR2    | T | 0.061 | 0.991 | [0.612,1.605] | 0.970 | 2.410 | [1.235,4.702] | 0.010 | 2.432 | [1.159,5.101] | 0.019 | 0.031 |
| rs6874005  | NSUN2   | T | 0.351 | 1.126 | [0.887,1.429] | 0.329 | 0.607 | [0.372,0.989] | 0.045 | 0.539 | [0.321,0.904] | 0.019 | 0.063 |
| rs1049216  | CASP3   | C | 0.292 | 0.881 | [0.685,1.132] | 0.322 | 1.519 | [1,2.306]     | 0.050 | 1.724 | [1.092,2.722] | 0.019 | 0.065 |
| rs628959   | DPYD    | G | 0.246 | 1.081 | [0.83,1.408]  | 0.565 | 0.515 | [0.284,0.935] | 0.029 | 0.477 | [0.256,0.888] | 0.020 | 0.065 |
| rs5993883  | COMT    | G | 0.482 | 1.049 | [0.831,1.324] | 0.690 | 1.817 | [1.18,2.798]  | 0.007 | 1.733 | [1.092,2.75]  | 0.020 | 0.025 |
| rs4459610  | ACE     | A | 0.448 | 0.741 | [0.582,0.944] | 0.015 | 1.289 | [0.837,1.985] | 0.250 | 1.739 | [1.09,2.773]  | 0.020 | 0.018 |
| rs2228468  | CCBP2   | C | 0.357 | 1.120 | [0.874,1.435] | 0.370 | 0.597 | [0.361,0.987] | 0.044 | 0.533 | [0.313,0.907] | 0.020 | 0.068 |
| rs994174   | NRG3    | G | 0.387 | 0.977 | [0.756,1.262] | 0.858 | 0.519 | [0.314,0.858] | 0.011 | 0.531 | [0.311,0.907] | 0.021 | 0.038 |
| rs40228    | TPK1    | T | 0.205 | 1.196 | [0.89,1.608]  | 0.235 | 0.557 | [0.302,1.029] | 0.062 | 0.466 | [0.244,0.89]  | 0.021 | 0.063 |
| rs505770   | MMP12   | A | 0.081 | 1.264 | [0.797,2.005] | 0.320 | 0.283 | [0.083,0.965] | 0.044 | 0.224 | [0.063,0.796] | 0.021 | 0.064 |
| rs1801131  | MTHFR   | C | 0.287 | 0.915 | [0.701,1.193] | 0.512 | 1.638 | [1.037,2.587] | 0.034 | 1.790 | [1.091,2.939] | 0.021 | 0.067 |
| rs2270422  | GSTZ1   | C | 0.356 | 0.852 | [0.661,1.099] | 0.217 | 1.506 | [0.959,2.365] | 0.076 | 1.767 | [1.085,2.878] | 0.022 | 0.068 |

|            |          |   |       |       |               |       |       |               |       |       |               |       |       |
|------------|----------|---|-------|-------|---------------|-------|-------|---------------|-------|-------|---------------|-------|-------|
| rs2180314  | GSTA2    | C | 0.441 | 1.001 | [0.787,1.273] | 0.993 | 0.566 | [0.358,0.895] | 0.015 | 0.565 | [0.346,0.922] | 0.022 | 0.049 |
| rs1800935  | MSH6     | C | 0.268 | 1.066 | [0.822,1.384] | 0.629 | 0.537 | [0.306,0.941] | 0.030 | 0.503 | [0.279,0.908] | 0.023 | 0.071 |
| rs10249476 | LEP      | T | 0.368 | 0.881 | [0.689,1.127] | 0.314 | 1.521 | [0.983,2.355] | 0.060 | 1.726 | [1.077,2.767] | 0.023 | 0.076 |
| rs6095558  | PTGIS    | T | 0.226 | 1.079 | [0.827,1.406] | 0.576 | 0.525 | [0.289,0.955] | 0.035 | 0.487 | [0.261,0.909] | 0.024 | 0.077 |
| rs5299     | CYP11B1  | A | 0.409 | 0.809 | [0.634,1.033] | 0.089 | 1.397 | [0.9,2.17]    | 0.136 | 1.727 | [1.074,2.776] | 0.024 | 0.053 |
| rs2813545  | ESR1     | C | 0.226 | 0.934 | [0.701,1.246] | 0.643 | 1.675 | [1.053,2.666] | 0.029 | 1.793 | [1.08,2.979]  | 0.024 | 0.067 |
| rs628031   | SLC22A1  | A | 0.366 | 0.788 | [0.618,1.006] | 0.056 | 1.347 | [0.875,2.073] | 0.176 | 1.708 | [1.071,2.725] | 0.025 | 0.044 |
| rs6482573  | PDSS1    | A | 0.428 | 1.295 | [1.013,1.656] | 0.039 | 0.741 | [0.469,1.171] | 0.199 | 0.572 | [0.351,0.933] | 0.025 | 0.034 |
| rs2167270  | LEP      | A | 0.388 | 0.877 | [0.688,1.118] | 0.290 | 1.492 | [0.969,2.297] | 0.069 | 1.701 | [1.068,2.71]  | 0.025 | 0.081 |
| rs8192678  | PPARGC1A | A | 0.294 | 0.928 | [0.708,1.216] | 0.590 | 1.668 | [1.033,2.692] | 0.036 | 1.797 | [1.074,3.007] | 0.026 | 0.078 |
| rs4348159  | UGT2B7   | T | 0.118 | 1.372 | [0.93,2.025]  | 0.111 | 0.469 | [0.189,1.164] | 0.103 | 0.341 | [0.133,0.879] | 0.026 | 0.052 |
| rs861529   | XRCC3    | A | 0.076 | 1.458 | [0.937,2.267] | 0.094 | 0.352 | [0.104,1.184] | 0.092 | 0.241 | [0.069,0.843] | 0.026 | 0.044 |
| rs13817    | MUS81    | G | 0.426 | 1.465 | [1.136,1.889] | 0.003 | 0.835 | [0.526,1.325] | 0.444 | 0.570 | [0.347,0.937] | 0.027 | 0.007 |
| rs16754    | WT1      | G | 0.149 | 1.561 | [1.164,2.093] | 0.003 | 0.703 | [0.356,1.39]  | 0.311 | 0.451 | [0.222,0.913] | 0.027 | 0.004 |
| rs827500   | DPYD     | T | 0.240 | 1.081 | [0.829,1.411] | 0.565 | 0.535 | [0.295,0.973] | 0.040 | 0.495 | [0.265,0.924] | 0.027 | 0.087 |
| rs348449   | ALDH1A1  | C | 0.050 | 0.662 | [0.357,1.229] | 0.191 | 1.791 | [0.865,3.711] | 0.117 | 2.706 | [1.117,6.556] | 0.027 | 0.088 |
| rs499009   | DPYD     | A | 0.240 | 1.075 | [0.824,1.403] | 0.596 | 0.533 | [0.293,0.968] | 0.039 | 0.496 | [0.266,0.925] | 0.027 | 0.087 |
| rs348445   | ALDH1A1  | T | 0.051 | 0.640 | [0.338,1.209] | 0.169 | 1.820 | [0.835,3.968] | 0.132 | 2.845 | [1.122,7.213] | 0.028 | 0.087 |
| rs3789452  | ABCA4    | A | 0.282 | 0.974 | [0.746,1.273] | 0.848 | 1.712 | [1.077,2.721] | 0.023 | 1.757 | [1.064,2.903] | 0.028 | 0.066 |
| rs4646285  | SLC10A1  | A | 0.077 | 1.035 | [0.677,1.582] | 0.875 | 0.106 | [0.014,0.79]  | 0.029 | 0.102 | [0.013,0.781] | 0.028 | 0.088 |
| rs909253   | LTA      | C | 0.384 | 1.150 | [0.903,1.465] | 0.256 | 0.658 | [0.41,1.053]  | 0.081 | 0.572 | [0.346,0.944] | 0.029 | 0.085 |
| rs8053     | PSMA4    | T | 0.377 | 0.880 | [0.69,1.123]  | 0.305 | 1.493 | [0.962,2.316] | 0.074 | 1.696 | [1.056,2.724] | 0.029 | 0.091 |
| rs4648058  | NFKB1    | C | 0.297 | 1.206 | [0.942,1.543] | 0.137 | 0.663 | [0.398,1.102] | 0.113 | 0.550 | [0.321,0.941] | 0.029 | 0.068 |
| rs967935   | ABCC3    | T | 0.080 | 1.442 | [0.941,2.208] | 0.093 | 0.367 | [0.111,1.217] | 0.101 | 0.255 | [0.074,0.872] | 0.029 | 0.046 |
| rs2276583  | ERCC3    | A | 0.366 | 1.240 | [0.976,1.577] | 0.079 | 0.706 | [0.438,1.14]  | 0.154 | 0.570 | [0.343,0.946] | 0.030 | 0.054 |
| rs4656994  | NDUFS2   | A | 0.218 | 0.833 | [0.62,1.119]  | 0.224 | 1.476 | [0.925,2.357] | 0.103 | 1.772 | [1.056,2.974] | 0.030 | 0.092 |
| rs712704   | PAX4     | C | 0.205 | 1.204 | [0.902,1.606] | 0.208 | 2.110 | [1.319,3.377] | 0.002 | 1.754 | [1.054,2.917] | 0.031 | 0.006 |
| rs526645   | DPYD     | C | 0.239 | 1.062 | [0.814,1.386] | 0.657 | 0.536 | [0.295,0.973] | 0.040 | 0.505 | [0.271,0.941] | 0.031 | 0.096 |
| rs7386926  | CYP11B1  | A | 0.414 | 0.815 | [0.641,1.036] | 0.095 | 1.351 | [0.882,2.07]  | 0.166 | 1.658 | [1.046,2.629] | 0.031 | 0.067 |
| rs1134095  | CYP11B1  | C | 0.414 | 0.819 | [0.644,1.041] | 0.103 | 1.358 | [0.886,2.08]  | 0.160 | 1.658 | [1.045,2.629] | 0.032 | 0.070 |
| rs2687117  | CYP3A4   | T | 0.057 | 1.086 | [0.567,2.08]  | 0.804 | 0.180 | [0.038,0.86]  | 0.032 | 0.166 | [0.032,0.855] | 0.032 | 0.090 |
| rs737865   | COMT     | C | 0.253 | 0.865 | [0.659,1.135] | 0.294 | 1.501 | [0.943,2.389] | 0.087 | 1.737 | [1.049,2.876] | 0.032 | 0.099 |
| rs4648133  | NFKB1    | C | 0.260 | 1.257 | [0.967,1.635] | 0.088 | 0.664 | [0.381,1.158] | 0.149 | 0.528 | [0.294,0.948] | 0.032 | 0.058 |
| rs6664     | CHST2    | T | 0.384 | 1.021 | [0.793,1.314] | 0.874 | 0.580 | [0.356,0.945] | 0.029 | 0.568 | [0.337,0.956] | 0.033 | 0.083 |
| rs207932   | XRCC5    | T | 0.418 | 0.813 | [0.639,1.034] | 0.092 | 1.335 | [0.876,2.035] | 0.178 | 1.643 | [1.04,2.594]  | 0.033 | 0.069 |
| rs13115754 | PPP3CA   | G | 0.388 | 1.228 | [0.962,1.568] | 0.099 | 0.708 | [0.439,1.142] | 0.157 | 0.577 | [0.347,0.958] | 0.033 | 0.066 |
| rs4536     | CYP11B2  | A | 0.069 | 1.197 | [0.741,1.936] | 0.462 | 0.291 | [0.083,1.025] | 0.055 | 0.243 | [0.066,0.897] | 0.034 | 0.104 |
| rs1892534  | LEPR     | A | 0.417 | 0.999 | [0.788,1.267] | 0.992 | 1.646 | [1.071,2.529] | 0.023 | 1.648 | [1.038,2.616] | 0.034 | 0.072 |
| rs3093930  | PARP2    | T | 0.391 | 1.193 | [0.926,1.537] | 0.173 | 0.687 | [0.426,1.107] | 0.123 | 0.576 | [0.346,0.96]  | 0.034 | 0.088 |
| rs801720   | CERK     | T | 0.453 | 0.962 | [0.753,1.229] | 0.757 | 1.607 | [1.03,2.506]  | 0.037 | 1.670 | [1.036,2.691] | 0.035 | 0.094 |
| rs4148416  | ABCC3    | T | 0.082 | 1.307 | [0.85,2.01]   | 0.223 | 0.349 | [0.105,1.159] | 0.086 | 0.267 | [0.078,0.918] | 0.036 | 0.086 |

|            |            |   |       |       |               |       |       |                |       |       |                |       |       |
|------------|------------|---|-------|-------|---------------|-------|-------|----------------|-------|-------|----------------|-------|-------|
| rs7698628  | SPARCL1    | T | 0.449 | 1.066 | [0.831,1.368] | 0.614 | 1.800 | [1.138,2.846]  | 0.012 | 1.688 | [1.034,2.757]  | 0.036 | 0.042 |
| rs2275566  | MTR        | C | 0.292 | 1.217 | [0.947,1.563] | 0.125 | 0.689 | [0.416,1.141]  | 0.148 | 0.566 | [0.332,0.965]  | 0.037 | 0.077 |
| rs1801196  | WRN        | T | 0.292 | 0.818 | [0.627,1.067] | 0.139 | 1.372 | [0.877,2.147]  | 0.166 | 1.677 | [1.03,2.732]   | 0.038 | 0.092 |
| rs2741045  | UGT1A10    | T | 0.248 | 0.912 | [0.688,1.209] | 0.522 | 1.587 | [0.98,2.572]   | 0.061 | 1.740 | [1.031,2.937]  | 0.038 | 0.113 |
| rs2741046  | UGT1A10    | C | 0.248 | 0.912 | [0.688,1.209] | 0.522 | 1.587 | [0.98,2.572]   | 0.061 | 1.740 | [1.031,2.937]  | 0.038 | 0.113 |
| rs338599   | CYP2S1     | C | 0.065 | 0.690 | [0.41,1.162]  | 0.163 | 1.570 | [0.812,3.036]  | 0.180 | 2.274 | [1.046,4.944]  | 0.038 | 0.111 |
| rs121      | OSBPL3     | A | 0.473 | 1.195 | [0.946,1.51]  | 0.136 | 0.733 | [0.476,1.129]  | 0.159 | 0.613 | [0.386,0.975]  | 0.039 | 0.088 |
| rs7441774  | UGT2B7     | G | 0.419 | 0.854 | [0.654,1.115] | 0.247 | 1.498 | [0.912,2.458]  | 0.110 | 1.753 | [1.029,2.988]  | 0.039 | 0.110 |
| rs1049544  | SPARCL1    | G | 0.450 | 1.072 | [0.835,1.378] | 0.584 | 1.797 | [1.135,2.847]  | 0.012 | 1.676 | [1.024,2.742]  | 0.040 | 0.043 |
| rs3822430  | SRD5A1     | C | 0.358 | 1.115 | [0.885,1.405] | 0.357 | 0.671 | [0.425,1.061]  | 0.088 | 0.602 | [0.37,0.979]   | 0.041 | 0.121 |
| rs1368408  | SCGB3A2    | A | 0.176 | 1.384 | [1.027,1.864] | 0.033 | 0.698 | [0.372,1.309]  | 0.262 | 0.504 | [0.261,0.976]  | 0.042 | 0.038 |
| rs26784    | MSH3       | C | 0.374 | 0.767 | [0.596,0.987] | 0.039 | 1.254 | [0.81,1.942]   | 0.310 | 1.635 | [1.017,2.628]  | 0.042 | 0.051 |
| rs2618346  | DUSP1      | T | 0.088 | 0.856 | [0.559,1.311] | 0.474 | 1.828 | [0.946,3.536]  | 0.073 | 2.137 | [1.026,4.449]  | 0.042 | 0.124 |
| rs408820   | GSTA4      | G | 0.054 | 0.561 | [0.304,1.036] | 0.065 | 1.455 | [0.676,3.133]  | 0.338 | 2.593 | [1.033,6.51]   | 0.042 | 0.089 |
| rs10018198 | Intergenic | C | 0.207 | 0.842 | [0.618,1.148] | 0.278 | 1.507 | [0.9,2.525]    | 0.119 | 1.789 | [1.018,3.146]  | 0.043 | 0.126 |
| rs7823144  | LSM1       | A | 0.120 | 1.128 | [0.781,1.631] | 0.520 | 0.453 | [0.194,1.056]  | 0.067 | 0.401 | [0.165,0.973]  | 0.043 | 0.130 |
| rs3806798  | IL15       | T | 0.101 | 1.056 | [0.716,1.556] | 0.784 | 2.065 | [1.141,3.738]  | 0.017 | 1.956 | [1.019,3.755]  | 0.044 | 0.056 |
| rs2741872  | CYP3A7     | A | 0.150 | 1.394 | [0.996,1.95]  | 0.053 | 0.677 | [0.349,1.314]  | 0.249 | 0.486 | [0.241,0.981]  | 0.044 | 0.056 |
| rs811925   | PRDM1      | C | 0.156 | 1.138 | [0.83,1.56]   | 0.421 | 0.522 | [0.252,1.082]  | 0.081 | 0.459 | [0.214,0.981]  | 0.045 | 0.130 |
| rs4674258  | IL8RB      | T | 0.485 | 0.987 | [0.785,1.24]  | 0.909 | 0.620 | [0.405,0.949]  | 0.028 | 0.628 | [0.398,0.99]   | 0.045 | 0.087 |
| rs3766730  | TNFRSF1B   | T | 0.148 | 0.605 | [0.419,0.871] | 0.007 | 1.161 | [0.657,2.054]  | 0.607 | 1.921 | [1.014,3.639]  | 0.045 | 0.018 |
| rs1249958  | PPP1R1A    | T | 0.013 | 0.705 | [0.146,3.418] | 0.665 | 5.646 | [1.183,26.958] | 0.030 | 8.005 | [1.038,61.719] | 0.046 | 0.070 |
| rs17342647 | CYP3A43    | T | 0.089 | 0.951 | [0.624,1.45]  | 0.817 | 1.949 | [1.025,3.706]  | 0.042 | 2.049 | [1.011,4.15]   | 0.046 | 0.106 |
| rs3020314  | ESR1       | C | 0.414 | 1.244 | [0.977,1.584] | 0.077 | 0.761 | [0.484,1.196]  | 0.236 | 0.611 | [0.377,0.992]  | 0.046 | 0.075 |
| rs3176879  | VCAM1      | G | 0.077 | 1.398 | [0.862,2.268] | 0.175 | 0.453 | [0.158,1.302]  | 0.142 | 0.324 | [0.107,0.986]  | 0.047 | 0.106 |
| rs3734354  | SIM1       | A | 0.122 | 0.970 | [0.673,1.399] | 0.872 | 1.869 | [1.031,3.388]  | 0.039 | 1.926 | [1.007,3.684]  | 0.048 | 0.106 |
| rs11959820 | PPARGC1B   | A | 0.061 | 0.581 | [0.329,1.028] | 0.062 | 1.394 | [0.665,2.92]   | 0.379 | 2.398 | [1.009,5.701]  | 0.048 | 0.089 |
| rs7208693  | MPO        | A | 0.089 | 1.265 | [0.854,1.872] | 0.241 | 0.424 | [0.149,1.208]  | 0.108 | 0.336 | [0.114,0.991]  | 0.048 | 0.114 |
| rs246230   | ABCC1      | T | 0.179 | 1.049 | [0.772,1.424] | 0.761 | 1.779 | [1.102,2.871]  | 0.018 | 1.696 | [1.004,2.865]  | 0.048 | 0.062 |
| rs816060   | TNFRSF1B   | C | 0.367 | 0.775 | [0.606,0.991] | 0.042 | 1.248 | [0.805,1.935]  | 0.321 | 1.610 | [1.003,2.585]  | 0.048 | 0.057 |
| rs3176875  | VCAM1      | A | 0.045 | 1.669 | [0.974,2.86]  | 0.062 | 0.345 | [0.074,1.594]  | 0.173 | 0.206 | [0.043,0.993]  | 0.049 | 0.052 |
| rs1887994  | ESR2       | T | 0.082 | 1.397 | [0.93,2.1]    | 0.107 | 0.472 | [0.165,1.353]  | 0.162 | 0.338 | [0.114,0.999]  | 0.050 | 0.077 |
| rs3821107  | XRCC5      | G | 0.267 | 1.182 | [0.903,1.548] | 0.223 | 0.673 | [0.396,1.145]  | 0.144 | 0.570 | [0.324,1.001]  | 0.050 | 0.126 |
| rs3746101  | MKKN2      | T | 0.076 | 1.327 | [0.854,2.061] | 0.208 | 0.382 | [0.113,1.291]  | 0.121 | 0.288 | [0.082,1.005]  | 0.051 | 0.108 |
| rs1327474  | IFNGR1     | G | 0.364 | 0.754 | [0.584,0.973] | 0.030 | 1.221 | [0.78,1.91]    | 0.382 | 1.619 | [0.997,2.628]  | 0.051 | 0.047 |
| rs2410558  | NAT2       | T | 0.320 | 1.036 | [0.803,1.336] | 0.786 | 1.651 | [1.068,2.552]  | 0.024 | 1.594 | [0.996,2.549]  | 0.052 | 0.078 |
| rs2695232  | SOD3       | C | 0.445 | 1.117 | [0.871,1.433] | 0.384 | 0.674 | [0.417,1.087]  | 0.106 | 0.603 | [0.362,1.005]  | 0.052 | 0.150 |
| rs2267665  | PPARD      | A | 0.163 | 0.740 | [0.525,1.044] | 0.086 | 1.307 | [0.785,2.178]  | 0.304 | 1.767 | [0.992,3.145]  | 0.053 | 0.103 |
| rs2239815  | XBP1       | C | 0.382 | 0.805 | [0.624,1.04]  | 0.097 | 1.290 | [0.831,2.002]  | 0.257 | 1.601 | [0.993,2.582]  | 0.053 | 0.098 |
| rs1029702  | NPC2       | A | 0.213 | 0.978 | [0.727,1.315] | 0.881 | 1.647 | [1.015,2.674]  | 0.043 | 1.685 | [0.992,2.861]  | 0.054 | 0.118 |
| rs3087461  | WT1        | T | 0.089 | 0.999 | [0.664,1.502] | 0.995 | 0.303 | [0.094,0.98]   | 0.046 | 0.303 | [0.09,1.019]   | 0.054 | 0.135 |

|           |         |   |       |       |               |       |       |               |       |       |               |       |       |
|-----------|---------|---|-------|-------|---------------|-------|-------|---------------|-------|-------|---------------|-------|-------|
| rs1128503 | ABCB1   | T | 0.392 | 1.025 | [0.802,1.312] | 0.842 | 0.622 | [0.385,1.004] | 0.052 | 0.607 | [0.365,1.008] | 0.054 | 0.135 |
| rs3774936 | NFKB1   | T | 0.285 | 1.249 | [0.962,1.621] | 0.095 | 0.718 | [0.421,1.224] | 0.223 | 0.575 | [0.327,1.009] | 0.054 | 0.087 |
| rs1052555 | ERCC2   | T | 0.280 | 0.839 | [0.646,1.09]  | 0.188 | 1.355 | [0.864,2.126] | 0.186 | 1.615 | [0.992,2.63]  | 0.054 | 0.132 |
| rs7926138 | MRE11A  | A | 0.054 | 1.550 | [0.874,2.748] | 0.134 | 0.418 | [0.118,1.483] | 0.177 | 0.269 | [0.071,1.026] | 0.055 | 0.104 |
| rs9808753 | IFNGR2  | G | 0.150 | 1.160 | [0.843,1.597] | 0.361 | 1.969 | [1.2,3.231]   | 0.007 | 1.697 | [0.989,2.911] | 0.055 | 0.025 |
| rs12418   | CHST3   | A | 0.433 | 0.941 | [0.744,1.19]  | 0.611 | 1.468 | [0.962,2.24]  | 0.075 | 1.561 | [0.991,2.459] | 0.055 | 0.153 |
| rs35595   | ABCC1   | A | 0.200 | 1.022 | [0.755,1.384] | 0.887 | 1.711 | [1.057,2.767] | 0.029 | 1.673 | [0.989,2.832] | 0.055 | 0.089 |
| rs2279574 | DUSP6   | A | 0.491 | 0.967 | [0.756,1.237] | 0.790 | 0.599 | [0.379,0.946] | 0.028 | 0.620 | [0.38,1.011]  | 0.055 | 0.090 |
| rs1609519 | DPYD    | G | 0.238 | 1.062 | [0.813,1.386] | 0.660 | 0.587 | [0.329,1.048] | 0.071 | 0.553 | [0.302,1.014] | 0.056 | 0.157 |
| rs3218536 | XRCC2   | A | 0.066 | 1.868 | [1.226,2.846] | 0.004 | 0.578 | [0.178,1.879] | 0.362 | 0.310 | [0.093,1.031] | 0.056 | 0.007 |
| rs3774932 | NFKB1   | A | 0.422 | 0.837 | [0.657,1.066] | 0.149 | 1.308 | [0.855,2.002] | 0.215 | 1.564 | [0.987,2.477] | 0.057 | 0.124 |
| rs2452600 | PDLIM5  | T | 0.284 | 0.744 | [0.564,0.981] | 0.036 | 1.218 | [0.763,1.943] | 0.408 | 1.637 | [0.984,2.725] | 0.058 | 0.059 |
| rs215067  | ABCC1   | G | 0.054 | 1.093 | [0.65,1.841]  | 0.737 | 2.363 | [1.161,4.811] | 0.018 | 2.161 | [0.975,4.79]  | 0.058 | 0.060 |
| rs4148947 | CHST3   | C | 0.428 | 0.960 | [0.757,1.218] | 0.740 | 1.492 | [0.978,2.276] | 0.063 | 1.553 | [0.985,2.448] | 0.058 | 0.150 |
| rs2267668 | PPARD   | G | 0.163 | 0.765 | [0.547,1.07]  | 0.118 | 1.328 | [0.8,2.206]   | 0.273 | 1.737 | [0.982,3.072] | 0.058 | 0.124 |
| rs4148944 | CHST3   | A | 0.136 | 1.412 | [0.991,2.014] | 0.056 | 0.670 | [0.323,1.39]  | 0.283 | 0.475 | [0.22,1.026]  | 0.058 | 0.068 |
| rs2020917 | COMT    | T | 0.245 | 0.889 | [0.669,1.182] | 0.419 | 1.463 | [0.914,2.342] | 0.113 | 1.645 | [0.983,2.752] | 0.058 | 0.166 |
| rs740603  | COMT    | G | 0.481 | 0.956 | [0.755,1.21]  | 0.709 | 1.505 | [0.969,2.338] | 0.069 | 1.574 | [0.982,2.523] | 0.059 | 0.158 |
| rs769214  | CAT     | G | 0.360 | 1.125 | [0.884,1.43]  | 0.338 | 0.694 | [0.432,1.116] | 0.132 | 0.617 | [0.372,1.023] | 0.061 | 0.166 |
| rs3739922 | SETX    | G | 0.050 | 1.043 | [0.61,1.783]  | 0.877 | 2.268 | [1.087,4.731] | 0.029 | 2.174 | [0.963,4.907] | 0.061 | 0.088 |
| rs2151846 | ABCA4   | C | 0.397 | 1.003 | [0.786,1.281] | 0.979 | 1.574 | [1.015,2.442] | 0.043 | 1.569 | [0.978,2.518] | 0.062 | 0.124 |
| rs5301    | CYP11B1 | G | 0.474 | 1.189 | [0.942,1.501] | 0.146 | 0.771 | [0.504,1.178] | 0.229 | 0.648 | [0.411,1.023] | 0.062 | 0.128 |
| rs2968557 | ADCK2   | G | 0.203 | 1.048 | [0.753,1.458] | 0.780 | 0.535 | [0.275,1.04]  | 0.065 | 0.511 | [0.252,1.035] | 0.062 | 0.162 |
| rs882709  | SETX    | G | 0.105 | 0.840 | [0.566,1.247] | 0.387 | 1.529 | [0.871,2.682] | 0.139 | 1.820 | [0.969,3.419] | 0.063 | 0.176 |
| rs1879612 | IGF1R   | C | 0.428 | 1.100 | [0.874,1.384] | 0.417 | 1.680 | [1.106,2.552] | 0.015 | 1.528 | [0.977,2.39]  | 0.063 | 0.046 |
| rs9894946 | TP53    | A | 0.141 | 1.029 | [0.73,1.449]  | 0.871 | 0.461 | [0.204,1.04]  | 0.062 | 0.448 | [0.191,1.047] | 0.064 | 0.164 |
| rs1050152 | SLC22A4 | T | 0.313 | 0.853 | [0.657,1.108] | 0.233 | 1.370 | [0.86,2.183]  | 0.184 | 1.607 | [0.973,2.655] | 0.064 | 0.159 |
| rs3818644 | DNAJA1  | T | 0.328 | 0.917 | [0.707,1.19]  | 0.516 | 1.454 | [0.927,2.279] | 0.103 | 1.585 | [0.973,2.582] | 0.064 | 0.179 |
| rs2275801 | ZMYND8  | G | 0.154 | 0.792 | [0.537,1.168] | 0.240 | 0.353 | [0.157,0.793] | 0.012 | 0.446 | [0.189,1.051] | 0.065 | 0.028 |
| rs6018    | F5      | G | 0.049 | 1.053 | [0.623,1.781] | 0.846 | 2.230 | [1.1,4.52]    | 0.026 | 2.117 | [0.954,4.696] | 0.065 | 0.082 |
| rs4713858 | PPARD   | A | 0.147 | 0.763 | [0.537,1.084] | 0.131 | 1.337 | [0.787,2.272] | 0.283 | 1.753 | [0.965,3.183] | 0.065 | 0.141 |
| rs2069763 | IL2     | T | 0.325 | 1.359 | [1.066,1.733] | 0.013 | 0.854 | [0.536,1.359] | 0.505 | 0.628 | [0.383,1.03]  | 0.065 | 0.028 |
| rs1760215 | DPYD    | G | 0.084 | 1.243 | [0.824,1.875] | 0.300 | 0.398 | [0.122,1.295] | 0.126 | 0.320 | [0.095,1.076] | 0.065 | 0.153 |
| rs1399291 | DPYD    | T | 0.472 | 0.823 | [0.652,1.038] | 0.100 | 1.260 | [0.825,1.925] | 0.284 | 1.532 | [0.973,2.412] | 0.066 | 0.110 |
| rs3116496 | CD28    | C | 0.155 | 0.841 | [0.607,1.164] | 0.295 | 0.389 | [0.177,0.855] | 0.019 | 0.463 | [0.204,1.051] | 0.066 | 0.046 |
| rs1059262 | ALKBH2  | G | 0.183 | 0.954 | [0.707,1.288] | 0.760 | 0.495 | [0.254,0.964] | 0.039 | 0.518 | [0.257,1.044] | 0.066 | 0.118 |
| rs16941   | BRCA1   | G | 0.302 | 0.849 | [0.655,1.1]   | 0.215 | 1.335 | [0.856,2.081] | 0.202 | 1.573 | [0.97,2.549]  | 0.066 | 0.161 |
| rs3743259 | IGF1R   | G | 0.328 | 0.932 | [0.726,1.197] | 0.584 | 1.446 | [0.938,2.229] | 0.095 | 1.551 | [0.97,2.478]  | 0.067 | 0.182 |
| rs2280509 | FZD7    | T | 0.160 | 1.095 | [0.8,1.498]   | 0.572 | 0.525 | [0.247,1.116] | 0.094 | 0.479 | [0.218,1.052] | 0.067 | 0.186 |
| rs5182    | AGTR1   | T | 0.432 | 0.900 | [0.707,1.147] | 0.395 | 1.397 | [0.902,2.164] | 0.134 | 1.552 | [0.969,2.483] | 0.067 | 0.185 |
| rs5368    | SELE    | T | 0.108 | 0.890 | [0.601,1.319] | 0.561 | 1.655 | [0.908,3.017] | 0.100 | 1.859 | [0.957,3.612] | 0.067 | 0.181 |

|             |         |   |       |       |               |       |       |               |       |       |               |       |       |
|-------------|---------|---|-------|-------|---------------|-------|-------|---------------|-------|-------|---------------|-------|-------|
| rs1061472   | ATP7B   | A | 0.440 | 1.413 | [1.114,1.791] | 0.004 | 0.914 | [0.592,1.412] | 0.686 | 0.647 | [0.406,1.031] | 0.067 | 0.012 |
| rs9954562   | NFATC1  | T | 0.379 | 0.797 | [0.625,1.017] | 0.068 | 1.218 | [0.801,1.851] | 0.356 | 1.528 | [0.97,2.406]  | 0.067 | 0.093 |
| rs3136228   | MSH6    | G | 0.329 | 0.987 | [0.772,1.262] | 0.917 | 0.604 | [0.367,0.993] | 0.047 | 0.612 | [0.361,1.036] | 0.068 | 0.137 |
| rs1034809   | PON2    | A | 0.260 | 1.219 | [0.956,1.555] | 0.111 | 0.753 | [0.461,1.229] | 0.256 | 0.617 | [0.367,1.037] | 0.068 | 0.112 |
| rs2397118   | GSTA5   | C | 0.061 | 1.381 | [0.85,2.244]  | 0.193 | 0.425 | [0.125,1.443] | 0.170 | 0.308 | [0.086,1.095] | 0.069 | 0.137 |
| rs5303      | CYP11B1 | T | 0.388 | 0.799 | [0.625,1.022] | 0.074 | 1.239 | [0.799,1.92]  | 0.338 | 1.550 | [0.965,2.489] | 0.070 | 0.098 |
| rs593818    | CYP4F12 | A | 0.447 | 0.794 | [0.626,1.008] | 0.058 | 1.219 | [0.791,1.879] | 0.369 | 1.535 | [0.966,2.44]  | 0.070 | 0.084 |
| rs652438    | MMP12   | G | 0.064 | 1.008 | [0.61,1.665]  | 0.975 | 0.255 | [0.06,1.084]  | 0.064 | 0.253 | [0.057,1.122] | 0.071 | 0.177 |
| rs2241342   | ABCB11  | A | 0.367 | 0.915 | [0.713,1.174] | 0.486 | 1.407 | [0.916,2.16]  | 0.119 | 1.537 | [0.964,2.449] | 0.071 | 0.195 |
| rs6941583   | POLH    | T | 0.080 | 0.590 | [0.353,0.985] | 0.044 | 0.147 | [0.034,0.632] | 0.010 | 0.249 | [0.055,1.126] | 0.071 | 0.007 |
| rs3731722   | AOX1    | C | 0.073 | 0.662 | [0.403,1.089] | 0.105 | 1.389 | [0.692,2.79]  | 0.356 | 2.097 | [0.938,4.689] | 0.071 | 0.141 |
| rs1132054   | SULT2B1 | C | 0.494 | 1.005 | [0.795,1.272] | 0.964 | 1.537 | [0.997,2.368] | 0.051 | 1.528 | [0.963,2.427] | 0.072 | 0.146 |
| rs2238475   | ABCC1   | C | 0.049 | 1.592 | [0.97,2.612]  | 0.066 | 0.248 | [0.034,1.835] | 0.172 | 0.156 | [0.021,1.183] | 0.072 | 0.060 |
| rs3923647   | TLR1    | T | 0.037 | 1.261 | [0.691,2.301] | 0.450 | 0.181 | [0.023,1.447] | 0.107 | 0.143 | [0.017,1.192] | 0.072 | 0.184 |
| rs2297404   | ABCA1   | C | 0.075 | 0.951 | [0.615,1.471] | 0.821 | 0.311 | [0.095,1.018] | 0.054 | 0.327 | [0.096,1.111] | 0.073 | 0.155 |
| rs4148950   | CHST3   | A | 0.432 | 0.961 | [0.76,1.214]  | 0.739 | 1.451 | [0.954,2.206] | 0.082 | 1.510 | [0.962,2.371] | 0.073 | 0.186 |
| rs4418320   | CYP11B1 | A | 0.476 | 1.158 | [0.916,1.463] | 0.220 | 0.764 | [0.5,1.167]   | 0.213 | 0.660 | [0.418,1.04]  | 0.074 | 0.170 |
| rs2839686   | CXCL12  | T | 0.292 | 0.880 | [0.683,1.135] | 0.325 | 0.534 | [0.319,0.896] | 0.018 | 0.607 | [0.351,1.05]  | 0.074 | 0.047 |
| rs2056048   | DPYD    | C | 0.481 | 0.837 | [0.665,1.054] | 0.130 | 1.259 | [0.829,1.914] | 0.280 | 1.505 | [0.96,2.357]  | 0.074 | 0.136 |
| rs1801018   | BCL2    | G | 0.365 | 1.020 | [0.787,1.321] | 0.883 | 0.628 | [0.381,1.037] | 0.069 | 0.616 | [0.362,1.05]  | 0.075 | 0.177 |
| rs694564    | ALDH1A1 | A | 0.053 | 0.690 | [0.379,1.258] | 0.226 | 1.561 | [0.731,3.335] | 0.250 | 2.263 | [0.921,5.556] | 0.075 | 0.197 |
| rs7290221   | COMT    | G | 0.486 | 0.980 | [0.779,1.234] | 0.866 | 1.495 | [0.969,2.306] | 0.069 | 1.525 | [0.958,2.425] | 0.075 | 0.177 |
| rs2274405   | ABCC4   | T | 0.343 | 0.811 | [0.628,1.046] | 0.107 | 1.248 | [0.806,1.932] | 0.320 | 1.539 | [0.957,2.474] | 0.075 | 0.128 |
| rs1867351   | SLC22A1 | G | 0.234 | 1.334 | [1.029,1.728] | 0.030 | 0.809 | [0.48,1.366]  | 0.428 | 0.607 | [0.349,1.054] | 0.076 | 0.052 |
| rs731027    | CHST3   | C | 0.463 | 1.010 | [0.8,1.275]   | 0.936 | 1.514 | [0.997,2.299] | 0.052 | 1.500 | [0.957,2.349] | 0.077 | 0.148 |
| rs3181078   | CCR1    | G | 0.069 | 0.803 | [0.5,1.291]   | 0.366 | 1.673 | [0.799,3.502] | 0.172 | 2.082 | [0.921,4.706] | 0.078 | 0.210 |
| rs928169    | ATP7B   | C | 0.427 | 1.366 | [1.078,1.731] | 0.010 | 0.897 | [0.58,1.388]  | 0.625 | 0.657 | [0.411,1.048] | 0.078 | 0.025 |
| rs2602381   | UGT1A10 | T | 0.479 | 1.302 | [1.013,1.672] | 0.039 | 0.856 | [0.557,1.314] | 0.476 | 0.657 | [0.412,1.049] | 0.078 | 0.073 |
| rs207927    | XRCC5   | G | 0.406 | 0.773 | [0.605,0.986] | 0.038 | 1.175 | [0.763,1.808] | 0.465 | 1.520 | [0.953,2.424] | 0.079 | 0.070 |
| rs2335052   | GATA2   | A | 0.185 | 0.984 | [0.725,1.335] | 0.917 | 0.526 | [0.27,1.024]  | 0.059 | 0.534 | [0.265,1.075] | 0.079 | 0.166 |
| rs3212948   | ERCC1   | G | 0.464 | 0.957 | [0.745,1.229] | 0.728 | 1.469 | [0.939,2.297] | 0.092 | 1.535 | [0.95,2.482]  | 0.080 | 0.203 |
| rs13321     | TNC     | G | 0.283 | 1.173 | [0.906,1.519] | 0.226 | 1.782 | [1.153,2.755] | 0.009 | 1.519 | [0.95,2.429]  | 0.081 | 0.025 |
| rs4986790   | TLR4    | G | 0.049 | 0.882 | [0.514,1.515] | 0.650 | 0.137 | [0.017,1.074] | 0.058 | 0.155 | [0.019,1.261] | 0.081 | 0.158 |
| rs3100701   | HNMT    | T | 0.388 | 0.738 | [0.576,0.947] | 0.017 | 1.120 | [0.726,1.726] | 0.609 | 1.516 | [0.948,2.424] | 0.082 | 0.041 |
| rs1041981   | LTA     | A | 0.381 | 1.169 | [0.914,1.495] | 0.215 | 0.752 | [0.472,1.2]   | 0.232 | 0.644 | [0.392,1.058] | 0.082 | 0.179 |
| rs3118529   | RXRA    | C | 0.388 | 0.980 | [0.715,1.344] | 0.901 | 0.548 | [0.296,1.015] | 0.056 | 0.559 | [0.29,1.077]  | 0.082 | 0.160 |
| rs2032582_A | ABCB1   | T | 0.384 | 0.958 | [0.747,1.228] | 0.735 | 0.607 | [0.374,0.986] | 0.044 | 0.634 | [0.379,1.061] | 0.083 | 0.131 |
| rs9666607   | CD44    | A | 0.271 | 0.715 | [0.543,0.941] | 0.017 | 1.117 | [0.705,1.771] | 0.637 | 1.564 | [0.944,2.59]  | 0.083 | 0.042 |
| rs5997917   | LIMK2   | A | 0.179 | 1.174 | [0.862,1.599] | 0.310 | 0.659 | [0.355,1.222] | 0.185 | 0.561 | [0.291,1.081] | 0.084 | 0.205 |
| rs6027      | F5      | G | 0.050 | 1.098 | [0.655,1.843] | 0.722 | 2.209 | [1.087,4.488] | 0.028 | 2.011 | [0.909,4.447] | 0.084 | 0.091 |
| rs602990    | VAV2    | T | 0.436 | 1.015 | [0.791,1.302] | 0.909 | 1.561 | [0.988,2.466] | 0.056 | 1.538 | [0.943,2.51]  | 0.085 | 0.160 |

|            |           |   |       |       |               |       |       |               |       |       |               |       |       |
|------------|-----------|---|-------|-------|---------------|-------|-------|---------------|-------|-------|---------------|-------|-------|
| rs3745202  | PRX       | C | 0.156 | 1.133 | [0.812,1.582] | 0.462 | 0.557 | [0.256,1.213] | 0.141 | 0.492 | [0.219,1.106] | 0.086 | 0.223 |
| rs2297345  | PAK7      | T | 0.389 | 0.979 | [0.757,1.266] | 0.870 | 1.508 | [0.953,2.387] | 0.079 | 1.541 | [0.941,2.524] | 0.086 | 0.197 |
| rs1641536  | SHBG      | A | 0.208 | 1.168 | [0.866,1.575] | 0.310 | 0.666 | [0.364,1.219] | 0.187 | 0.570 | [0.3,1.083]   | 0.086 | 0.209 |
| rs7643645  | NR1I2     | G | 0.339 | 0.930 | [0.722,1.197] | 0.573 | 1.409 | [0.908,2.187] | 0.126 | 1.516 | [0.942,2.438] | 0.086 | 0.228 |
| rs207921   | XRCC5     | G | 0.406 | 0.784 | [0.615,1]     | 0.050 | 1.176 | [0.766,1.807] | 0.458 | 1.501 | [0.943,2.388] | 0.087 | 0.088 |
| rs867186   | PROCR     | G | 0.104 | 1.017 | [0.685,1.508] | 0.935 | 0.428 | [0.165,1.108] | 0.080 | 0.421 | [0.156,1.133] | 0.087 | 0.209 |
| rs3813572  | PSMA4     | G | 0.368 | 0.854 | [0.667,1.092] | 0.209 | 1.295 | [0.831,2.017] | 0.253 | 1.517 | [0.941,2.445] | 0.087 | 0.189 |
| rs13330634 | TNFRSF17  | A | 0.066 | 0.603 | [0.34,1.069]  | 0.083 | 1.365 | [0.603,3.093] | 0.456 | 2.263 | [0.886,5.778] | 0.088 | 0.139 |
| rs1059393  | ENOSF1    | C | 0.138 | 0.980 | [0.694,1.384] | 0.908 | 0.485 | [0.225,1.048] | 0.066 | 0.495 | [0.221,1.111] | 0.088 | 0.183 |
| rs800667   | CYP3A43   | G | 0.141 | 1.192 | [0.829,1.713] | 0.343 | 0.616 | [0.303,1.253] | 0.181 | 0.517 | [0.242,1.104] | 0.088 | 0.220 |
| rs7877     | FMO1      | A | 0.346 | 1.068 | [0.815,1.398] | 0.634 | 1.648 | [1.037,2.619] | 0.034 | 1.544 | [0.937,2.544] | 0.088 | 0.105 |
| rs2048074  | NEIL3     | A | 0.266 | 1.030 | [0.792,1.339] | 0.827 | 0.633 | [0.373,1.073] | 0.090 | 0.614 | [0.351,1.076] | 0.089 | 0.216 |
| rs3212961  | ERCC1     | A | 0.160 | 1.197 | [0.879,1.63]  | 0.254 | 0.661 | [0.345,1.269] | 0.214 | 0.553 | [0.279,1.094] | 0.089 | 0.194 |
| rs2687105  | CYP3A4    | T | 0.147 | 1.557 | [1.036,2.339] | 0.033 | 0.805 | [0.402,1.612] | 0.541 | 0.517 | [0.242,1.106] | 0.089 | 0.070 |
| rs2287622  | ABCB11    | T | 0.390 | 0.930 | [0.728,1.187] | 0.558 | 1.386 | [0.906,2.121] | 0.132 | 1.491 | [0.941,2.364] | 0.089 | 0.235 |
| rs5993875  | TXNRD2    | A | 0.409 | 1.082 | [0.857,1.365] | 0.509 | 0.713 | [0.453,1.122] | 0.144 | 0.659 | [0.407,1.067] | 0.090 | 0.238 |
| rs3218222  | CDKN2D    | A | 0.268 | 0.909 | [0.684,1.207] | 0.508 | 1.414 | [0.886,2.259] | 0.147 | 1.557 | [0.933,2.598] | 0.090 | 0.238 |
| rs730720   | CHST3     | A | 0.464 | 1.029 | [0.817,1.294] | 0.810 | 1.516 | [0.996,2.307] | 0.052 | 1.474 | [0.94,2.31]   | 0.091 | 0.151 |
| rs230532   | NFKB1     | A | 0.302 | 1.202 | [0.932,1.552] | 0.157 | 0.760 | [0.461,1.255] | 0.284 | 0.632 | [0.371,1.076] | 0.091 | 0.165 |
| rs4150416  | ERCC3     | G | 0.345 | 0.886 | [0.687,1.143] | 0.351 | 1.331 | [0.861,2.059] | 0.199 | 1.502 | [0.936,2.412] | 0.092 | 0.233 |
| UGT2B7_1d  | UGT2B7    | G | 0.169 | 0.924 | [0.673,1.27]  | 0.628 | 0.482 | [0.233,0.993] | 0.048 | 0.521 | [0.244,1.113] | 0.092 | 0.136 |
| rs13181    | ERCC2     | G | 0.331 | 0.910 | [0.709,1.167] | 0.458 | 1.360 | [0.881,2.1]   | 0.165 | 1.495 | [0.936,2.389] | 0.093 | 0.242 |
| rs13332630 | TNFRSF17  | C | 0.065 | 0.626 | [0.353,1.111] | 0.109 | 1.398 | [0.617,3.167] | 0.421 | 2.232 | [0.875,5.696] | 0.093 | 0.166 |
| rs2227999  | XPC       | A | 0.053 | 1.006 | [0.623,1.624] | 0.982 | 0.180 | [0.025,1.306] | 0.090 | 0.179 | [0.024,1.332] | 0.093 | 0.235 |
| rs3087455  | CASP3     | C | 0.341 | 0.887 | [0.689,1.143] | 0.354 | 1.338 | [0.86,2.084]  | 0.197 | 1.508 | [0.934,2.437] | 0.093 | 0.235 |
| rs2706357  | RAD50     | C | 0.080 | 1.490 | [0.837,2.655] | 0.175 | 0.594 | [0.222,1.587] | 0.299 | 0.398 | [0.136,1.168] | 0.093 | 0.190 |
| rs6898097  | RAD50     | G | 0.078 | 1.508 | [0.843,2.698] | 0.167 | 0.601 | [0.226,1.6]   | 0.308 | 0.398 | [0.136,1.168] | 0.093 | 0.187 |
| rs315952   | IL1RN     | C | 0.304 | 1.113 | [0.85,1.458]  | 0.436 | 1.690 | [1.079,2.647] | 0.022 | 1.518 | [0.931,2.476] | 0.094 | 0.065 |
| rs6668589  | PHGDH     | C | 0.298 | 1.138 | [0.881,1.468] | 0.322 | 0.728 | [0.446,1.189] | 0.205 | 0.640 | [0.38,1.079]  | 0.094 | 0.227 |
| rs2028373  | AICDA     | G | 0.421 | 1.238 | [0.969,1.58]  | 0.087 | 0.814 | [0.514,1.289] | 0.380 | 0.658 | [0.403,1.075] | 0.095 | 0.125 |
| rs1045105  | CATSPER4  | A | 0.119 | 0.757 | [0.518,1.106] | 0.150 | 1.317 | [0.736,2.358] | 0.354 | 1.740 | [0.908,3.333] | 0.095 | 0.186 |
| rs2235937  | PTPRU     | G | 0.251 | 0.999 | [0.767,1.301] | 0.994 | 0.614 | [0.356,1.057] | 0.078 | 0.614 | [0.346,1.089] | 0.096 | 0.207 |
| rs2522406  | RAD50     | T | 0.052 | 0.930 | [0.488,1.773] | 0.825 | 0.293 | [0.082,1.044] | 0.058 | 0.315 | [0.081,1.225] | 0.096 | 0.167 |
| rs5745549  | MSH4      | A | 0.055 | 0.802 | [0.467,1.377] | 0.424 | 1.609 | [0.796,3.251] | 0.185 | 2.005 | [0.884,4.549] | 0.096 | 0.249 |
| rs2274750  | TNC       | A | 0.040 | 1.784 | [1.033,3.08]  | 0.038 | 0.313 | [0.041,2.37]  | 0.261 | 0.176 | [0.023,1.364] | 0.096 | 0.049 |
| rs3828193  | CHST10    | A | 0.422 | 1.200 | [0.944,1.526] | 0.137 | 0.804 | [0.516,1.251] | 0.333 | 0.670 | [0.417,1.075] | 0.097 | 0.163 |
| rs1803250  | CTSB      | G | 0.110 | 1.378 | [0.958,1.982] | 0.084 | 2.311 | [1.314,4.064] | 0.004 | 1.678 | [0.909,3.098] | 0.098 | 0.007 |
| rs168351   | ALDH1A1   | G | 0.133 | 1.140 | [0.813,1.601] | 0.447 | 1.873 | [1.088,3.225] | 0.024 | 1.642 | [0.912,2.957] | 0.098 | 0.072 |
| rs2706364  | RAD50     | A | 0.081 | 1.444 | [0.814,2.56]  | 0.209 | 0.584 | [0.219,1.559] | 0.283 | 0.405 | [0.139,1.183] | 0.098 | 0.210 |
| rs1509618  | LOC728442 | C | 0.441 | 1.016 | [0.797,1.295] | 0.898 | 0.676 | [0.431,1.061] | 0.089 | 0.666 | [0.41,1.08]   | 0.099 | 0.221 |
| rs296365   | SULT2A1   | G | 0.310 | 1.017 | [0.782,1.324] | 0.899 | 0.651 | [0.396,1.07]  | 0.091 | 0.640 | [0.377,1.088] | 0.099 | 0.224 |

|            |         |   |       |       |               |       |       |               |       |       |                |       |       |
|------------|---------|---|-------|-------|---------------|-------|-------|---------------|-------|-------|----------------|-------|-------|
| rs2297518  | NOS2    | A | 0.172 | 0.830 | [0.602,1.146] | 0.258 | 1.351 | [0.795,2.297] | 0.267 | 1.627 | [0.911,2.906]  | 0.100 | 0.230 |
| rs2240871  | NCAPD2  | G | 0.166 | 1.183 | [0.871,1.606] | 0.283 | 0.659 | [0.339,1.283] | 0.220 | 0.557 | [0.277,1.12]   | 0.101 | 0.220 |
| rs10516782 | PTPN13  | G | 0.149 | 0.910 | [0.661,1.253] | 0.564 | 1.453 | [0.873,2.42]  | 0.151 | 1.597 | [0.913,2.791]  | 0.101 | 0.257 |
| rs5898     | F2      | A | 0.073 | 0.438 | [0.246,0.778] | 0.005 | 0.955 | [0.433,2.105] | 0.908 | 2.182 | [0.86,5.536]   | 0.101 | 0.019 |
| rs3100702  | HNMT    | T | 0.392 | 0.729 | [0.57,0.934]  | 0.012 | 1.080 | [0.701,1.665] | 0.727 | 1.481 | [0.926,2.368]  | 0.101 | 0.034 |
| rs1051775  | GSTA1   | G | 0.348 | 0.918 | [0.714,1.18]  | 0.504 | 0.592 | [0.361,0.97]  | 0.037 | 0.645 | [0.382,1.089]  | 0.101 | 0.106 |
| rs3765070  | CYP4F11 | T | 0.445 | 1.083 | [0.861,1.361] | 0.497 | 0.739 | [0.483,1.131] | 0.164 | 0.683 | [0.433,1.077]  | 0.101 | 0.260 |
| rs7761731  | CYP39A1 | T | 0.347 | 1.301 | [1.008,1.68]  | 0.044 | 0.850 | [0.529,1.368] | 0.504 | 0.654 | [0.393,1.086]  | 0.101 | 0.083 |
| rs2230593  | MST1R   | A | 0.069 | 0.991 | [0.598,1.643] | 0.973 | 0.286 | [0.068,1.209] | 0.089 | 0.288 | [0.065,1.279]  | 0.102 | 0.234 |
| rs667515   | CCND1   | C | 0.372 | 0.820 | [0.632,1.064] | 0.136 | 1.229 | [0.788,1.918] | 0.363 | 1.498 | [0.923,2.432]  | 0.102 | 0.176 |
| rs1364283  | HSD17B2 | A | 0.459 | 0.918 | [0.723,1.166] | 0.482 | 1.353 | [0.877,2.088] | 0.171 | 1.474 | [0.926,2.348]  | 0.102 | 0.262 |
| rs854570   | PON1    | C | 0.438 | 0.988 | [0.773,1.264] | 0.925 | 1.459 | [0.945,2.251] | 0.088 | 1.476 | [0.925,2.356]  | 0.102 | 0.220 |
| rs12360    | CYP3A7  | C | 0.179 | 1.267 | [0.913,1.757] | 0.156 | 0.723 | [0.383,1.363] | 0.316 | 0.570 | [0.291,1.119]  | 0.102 | 0.177 |
| rs9896405  | EME1    | G | 0.025 | 1.547 | [0.737,3.247] | 0.249 | 0.259 | [0.032,2.082] | 0.204 | 0.167 | [0.02,1.431]   | 0.103 | 0.197 |
| rs10211    | CYP3A7  | G | 0.179 | 1.266 | [0.913,1.756] | 0.158 | 0.723 | [0.383,1.363] | 0.316 | 0.571 | [0.291,1.12]   | 0.103 | 0.179 |
| rs2066470  | MTHFR   | T | 0.103 | 0.904 | [0.619,1.322] | 0.604 | 0.381 | [0.14,1.038]  | 0.059 | 0.421 | [0.149,1.192]  | 0.103 | 0.159 |
| rs5742659  | IGF1    | C | 0.022 | 0.452 | [0.144,1.423] | 0.175 | 1.752 | [0.468,6.559] | 0.405 | 3.873 | [0.756,19.825] | 0.104 | 0.238 |
| rs2522397  | RAD50   | T | 0.085 | 1.247 | [0.723,2.148] | 0.428 | 0.539 | [0.214,1.362] | 0.191 | 0.433 | [0.157,1.193]  | 0.105 | 0.268 |
| rs3750898  | DCLRE1A | G | 0.294 | 0.907 | [0.69,1.193]  | 0.486 | 1.367 | [0.866,2.156] | 0.179 | 1.506 | [0.917,2.473]  | 0.106 | 0.270 |
| rs3735586  | PON2    | A | 0.245 | 1.181 | [0.899,1.55]  | 0.232 | 0.744 | [0.44,1.26]   | 0.271 | 0.630 | [0.36,1.104]   | 0.106 | 0.219 |
| rs2546893  | IL12B   | A | 0.455 | 0.778 | [0.612,0.988] | 0.040 | 1.140 | [0.74,1.756]  | 0.552 | 1.465 | [0.922,2.33]   | 0.106 | 0.081 |
| rs722921   | ALDH1A1 | A | 0.437 | 0.988 | [0.781,1.248] | 0.917 | 0.669 | [0.429,1.042] | 0.076 | 0.677 | [0.422,1.087]  | 0.107 | 0.204 |
| rs9332098  | CYP2C9  | A | 0.052 | 0.412 | [0.209,0.812] | 0.010 | 1.017 | [0.402,2.574] | 0.971 | 2.468 | [0.823,7.401]  | 0.107 | 0.036 |
| rs7843746  | C8orf68 | C | 0.286 | 0.756 | [0.579,0.988] | 0.040 | 1.126 | [0.724,1.751] | 0.599 | 1.488 | [0.917,2.414]  | 0.107 | 0.088 |
| rs504122   | SPRY2   | T | 0.317 | 1.002 | [0.774,1.297] | 0.986 | 1.502 | [0.951,2.374] | 0.081 | 1.499 | [0.916,2.452]  | 0.107 | 0.213 |
| rs5343     | EDNRA   | T | 0.307 | 0.881 | [0.684,1.135] | 0.327 | 1.303 | [0.838,2.025] | 0.240 | 1.478 | [0.918,2.38]   | 0.108 | 0.256 |
| rs246228   | ABCC1   | C | 0.351 | 0.896 | [0.693,1.158] | 0.401 | 1.325 | [0.854,2.055] | 0.210 | 1.479 | [0.918,2.383]  | 0.108 | 0.269 |
| rs9352     | CHAF1A  | C | 0.444 | 0.938 | [0.744,1.184] | 0.592 | 0.641 | [0.415,0.991] | 0.046 | 0.683 | [0.429,1.087]  | 0.108 | 0.131 |
| rs156641   | LIG1    | A | 0.331 | 0.868 | [0.676,1.114] | 0.267 | 1.275 | [0.826,1.969] | 0.273 | 1.469 | [0.918,2.35]   | 0.108 | 0.242 |
| rs1062372  | JTV1    | A | 0.238 | 0.893 | [0.676,1.18]  | 0.427 | 0.549 | [0.313,0.961] | 0.036 | 0.614 | [0.339,1.114]  | 0.109 | 0.095 |
| rs2509915  | CNTF    | G | 0.453 | 1.009 | [0.792,1.287] | 0.940 | 0.675 | [0.425,1.071] | 0.095 | 0.669 | [0.409,1.093]  | 0.109 | 0.237 |
| rs1126580  | IL8RB   | A | 0.418 | 0.911 | [0.71,1.168]  | 0.462 | 0.596 | [0.366,0.971] | 0.038 | 0.654 | [0.39,1.099]   | 0.109 | 0.104 |
| rs3024680  | IL4R    | C | 0.050 | 1.182 | [0.685,2.041] | 0.548 | 0.350 | [0.084,1.468] | 0.151 | 0.296 | [0.067,1.313]  | 0.109 | 0.274 |
| rs2687140  | CYP3A7  | A | 0.177 | 1.319 | [0.953,1.825] | 0.095 | 0.776 | [0.422,1.426] | 0.414 | 0.588 | [0.307,1.126]  | 0.109 | 0.141 |
| rs2072052  | CDK4    | C | 0.278 | 1.107 | [0.859,1.428] | 0.432 | 0.704 | [0.416,1.192] | 0.191 | 0.636 | [0.365,1.107]  | 0.110 | 0.269 |
| rs2960306  | GRK4    | T | 0.376 | 0.859 | [0.673,1.097] | 0.224 | 1.252 | [0.818,1.917] | 0.300 | 1.457 | [0.919,2.312]  | 0.110 | 0.230 |
| rs10929302 | UGT1A10 | A | 0.300 | 0.981 | [0.748,1.286] | 0.888 | 1.475 | [0.928,2.342] | 0.100 | 1.504 | [0.912,2.479]  | 0.110 | 0.239 |
| rs207928   | XRCC5   | A | 0.406 | 0.774 | [0.607,0.988] | 0.039 | 1.128 | [0.737,1.727] | 0.579 | 1.457 | [0.918,2.312]  | 0.110 | 0.084 |
| rs3218651  | POLQ    | G | 0.180 | 0.922 | [0.681,1.248] | 0.598 | 1.419 | [0.874,2.304] | 0.157 | 1.540 | [0.907,2.613]  | 0.110 | 0.275 |
| rs2286232  | PON2    | T | 0.241 | 1.214 | [0.924,1.595] | 0.165 | 0.768 | [0.452,1.302] | 0.327 | 0.633 | [0.361,1.11]   | 0.110 | 0.191 |
| rs2299263  | PON2    | T | 0.241 | 1.214 | [0.924,1.595] | 0.165 | 0.768 | [0.452,1.302] | 0.327 | 0.633 | [0.361,1.11]   | 0.110 | 0.191 |

|            |          |   |       |       |               |       |       |               |       |       |               |       |       |
|------------|----------|---|-------|-------|---------------|-------|-------|---------------|-------|-------|---------------|-------|-------|
| rs628816   | DPYD     | A | 0.028 | 1.571 | [0.738,3.345] | 0.241 | 0.273 | [0.034,2.206] | 0.223 | 0.174 | [0.02,1.49]   | 0.110 | 0.204 |
| rs2185571  | CYP2C8   | T | 0.252 | 0.764 | [0.575,1.016] | 0.065 | 1.178 | [0.723,1.92]  | 0.510 | 1.542 | [0.906,2.625] | 0.111 | 0.120 |
| rs4371387  | APOB     | A | 0.181 | 0.885 | [0.646,1.212] | 0.445 | 1.424 | [0.832,2.435] | 0.197 | 1.609 | [0.896,2.89]  | 0.111 | 0.279 |
| rs1913474  | ESR1     | T | 0.226 | 1.007 | [0.758,1.338] | 0.959 | 0.616 | [0.348,1.093] | 0.098 | 0.612 | [0.334,1.12]  | 0.111 | 0.245 |
| rs1801200  | ERBB2    | G | 0.217 | 0.898 | [0.682,1.182] | 0.442 | 0.538 | [0.296,0.981] | 0.043 | 0.600 | [0.32,1.126]  | 0.112 | 0.112 |
| rs2238476  | ABCC1    | T | 0.059 | 0.987 | [0.606,1.608] | 0.958 | 1.864 | [0.92,3.778]  | 0.084 | 1.889 | [0.863,4.136] | 0.112 | 0.210 |
| rs6032     | F5       | G | 0.263 | 0.837 | [0.625,1.12]  | 0.231 | 1.294 | [0.79,2.12]   | 0.306 | 1.547 | [0.904,2.647] | 0.112 | 0.237 |
| rs3774968  | NFKB1    | A | 0.394 | 0.907 | [0.713,1.154] | 0.426 | 1.315 | [0.859,2.012] | 0.207 | 1.450 | [0.916,2.294] | 0.113 | 0.279 |
| rs1130643  | SPARCL1  | G | 0.178 | 0.775 | [0.547,1.097] | 0.151 | 1.275 | [0.73,2.226]  | 0.393 | 1.645 | [0.889,3.043] | 0.113 | 0.203 |
| rs3856806  | PPARG    | T | 0.126 | 1.498 | [1.064,2.108] | 0.021 | 0.810 | [0.39,1.68]   | 0.571 | 0.541 | [0.252,1.158] | 0.114 | 0.046 |
| rs1677649  | MSH3     | A | 0.276 | 0.936 | [0.723,1.212] | 0.616 | 0.597 | [0.352,1.01]  | 0.055 | 0.637 | [0.365,1.114] | 0.114 | 0.152 |
| rs5882     | CETP     | G | 0.372 | 1.040 | [0.816,1.327] | 0.750 | 1.510 | [0.982,2.32]  | 0.060 | 1.451 | [0.915,2.302] | 0.114 | 0.171 |
| rs2032583  | ABCB1    | C | 0.121 | 1.006 | [0.696,1.456] | 0.973 | 1.658 | [0.946,2.904] | 0.077 | 1.647 | [0.886,3.061] | 0.115 | 0.204 |
| rs2299266  | PON2     | G | 0.239 | 1.233 | [0.938,1.62]  | 0.134 | 0.785 | [0.463,1.331] | 0.368 | 0.637 | [0.363,1.116] | 0.115 | 0.175 |
| rs13112358 | NEIL3    | C | 0.265 | 1.000 | [0.771,1.298] | 1.000 | 0.639 | [0.378,1.081] | 0.095 | 0.639 | [0.366,1.116] | 0.116 | 0.243 |
| rs3918022  | CCNK     | G | 0.419 | 1.071 | [0.852,1.347] | 0.557 | 1.531 | [1.01,2.321]  | 0.045 | 1.430 | [0.916,2.231] | 0.116 | 0.128 |
| rs2090949  | CYP3A7   | G | 0.176 | 1.292 | [0.934,1.787] | 0.122 | 0.768 | [0.419,1.41]  | 0.395 | 0.595 | [0.311,1.137] | 0.116 | 0.170 |
| rs4698803  | EGF      | A | 0.179 | 0.936 | [0.688,1.274] | 0.674 | 1.467 | [0.875,2.46]  | 0.146 | 1.567 | [0.894,2.747] | 0.117 | 0.283 |
| rs2470144  | CYP19A1  | A | 0.444 | 1.108 | [0.868,1.414] | 0.409 | 0.749 | [0.474,1.185] | 0.217 | 0.676 | [0.414,1.104] | 0.118 | 0.284 |
| rs6742078  | UGT1A1   | T | 0.330 | 0.996 | [0.766,1.295] | 0.976 | 1.465 | [0.938,2.29]  | 0.094 | 1.471 | [0.907,2.388] | 0.118 | 0.236 |
| rs2740560  | CYP3A7   | A | 0.179 | 1.252 | [0.907,1.729] | 0.172 | 0.748 | [0.408,1.371] | 0.348 | 0.597 | [0.313,1.14]  | 0.118 | 0.206 |
| rs2368564  | REN      | T | 0.337 | 0.954 | [0.736,1.237] | 0.723 | 0.628 | [0.384,1.026] | 0.063 | 0.658 | [0.39,1.112]  | 0.118 | 0.177 |
| rs744389   | PRX      | T | 0.154 | 0.896 | [0.638,1.257] | 0.525 | 0.474 | [0.221,1.016] | 0.055 | 0.529 | [0.238,1.176] | 0.118 | 0.145 |
| rs246221   | ABCC1    | C | 0.352 | 0.910 | [0.705,1.176] | 0.471 | 1.329 | [0.857,2.061] | 0.203 | 1.460 | [0.907,2.35]  | 0.119 | 0.295 |
| rs4524     | F5       | G | 0.251 | 0.806 | [0.606,1.072] | 0.138 | 1.230 | [0.754,2.005] | 0.407 | 1.526 | [0.897,2.596] | 0.119 | 0.194 |
| rs35587    | ABCC1    | C | 0.352 | 0.900 | [0.696,1.163] | 0.421 | 1.314 | [0.847,2.039] | 0.223 | 1.460 | [0.907,2.351] | 0.119 | 0.292 |
| rs4952220  | SRD5A2   | C | 0.462 | 0.988 | [0.78,1.253]  | 0.924 | 1.423 | [0.929,2.181] | 0.105 | 1.440 | [0.91,2.279]  | 0.120 | 0.256 |
| rs752760   | CYP19A1  | C | 0.481 | 1.063 | [0.83,1.36]   | 0.630 | 0.724 | [0.462,1.136] | 0.160 | 0.682 | [0.42,1.105]  | 0.120 | 0.297 |
| rs2037497  | CYP3A7   | C | 0.175 | 1.292 | [0.934,1.787] | 0.121 | 0.774 | [0.421,1.42]  | 0.407 | 0.599 | [0.313,1.144] | 0.121 | 0.173 |
| rs1148459  | TNFRSF1B | A | 0.491 | 1.052 | [0.836,1.323] | 0.667 | 0.730 | [0.475,1.123] | 0.152 | 0.695 | [0.438,1.101] | 0.121 | 0.296 |
| rs212082   | ABCC1    | C | 0.174 | 1.047 | [0.773,1.417] | 0.769 | 0.619 | [0.331,1.161] | 0.135 | 0.592 | [0.305,1.148] | 0.121 | 0.291 |
| rs10517    | NQO1     | T | 0.135 | 0.972 | [0.69,1.371]  | 0.874 | 0.527 | [0.253,1.1]   | 0.088 | 0.542 | [0.25,1.177]  | 0.122 | 0.233 |
| rs4525     | F5       | G | 0.244 | 0.809 | [0.605,1.082] | 0.153 | 1.233 | [0.756,2.013] | 0.401 | 1.524 | [0.894,2.6]   | 0.122 | 0.208 |
| rs2299264  | PON2     | T | 0.238 | 1.207 | [0.918,1.586] | 0.177 | 0.775 | [0.457,1.314] | 0.344 | 0.642 | [0.366,1.126] | 0.122 | 0.211 |
| rs2222411  | CYP3A7   | G | 0.175 | 1.291 | [0.933,1.784] | 0.123 | 0.774 | [0.421,1.421] | 0.408 | 0.600 | [0.314,1.146] | 0.122 | 0.175 |
| rs2687142  | CYP3A7   | T | 0.175 | 1.291 | [0.933,1.784] | 0.123 | 0.774 | [0.421,1.421] | 0.408 | 0.600 | [0.314,1.146] | 0.122 | 0.175 |
| rs2687145  | CYP3A7   | T | 0.175 | 1.291 | [0.933,1.784] | 0.123 | 0.774 | [0.421,1.421] | 0.408 | 0.600 | [0.314,1.146] | 0.122 | 0.175 |
| rs2037499  | CYP3A7   | C | 0.175 | 1.289 | [0.933,1.782] | 0.124 | 0.773 | [0.421,1.42]  | 0.407 | 0.600 | [0.314,1.147] | 0.122 | 0.177 |
| rs2303317  | ALDH1A1  | T | 0.450 | 0.949 | [0.756,1.193] | 0.655 | 0.662 | [0.431,1.016] | 0.059 | 0.697 | [0.441,1.102] | 0.122 | 0.165 |
| rs2687143  | CYP3A7   | G | 0.175 | 1.288 | [0.932,1.781] | 0.126 | 0.773 | [0.421,1.419] | 0.406 | 0.600 | [0.314,1.147] | 0.122 | 0.178 |
| rs1357319  | CYP3A7   | A | 0.175 | 1.289 | [0.932,1.782] | 0.125 | 0.773 | [0.421,1.42]  | 0.407 | 0.600 | [0.314,1.147] | 0.122 | 0.177 |

|            |          |   |       |       |               |       |       |               |       |       |               |       |       |
|------------|----------|---|-------|-------|---------------|-------|-------|---------------|-------|-------|---------------|-------|-------|
| rs680      | IGF2     | A | 0.246 | 0.861 | [0.655,1.132] | 0.283 | 1.297 | [0.801,2.101] | 0.290 | 1.507 | [0.896,2.535] | 0.122 | 0.268 |
| rs1798745  | DPYD     | T | 0.025 | 1.799 | [0.787,4.115] | 0.164 | 0.320 | [0.039,2.65]  | 0.291 | 0.178 | [0.02,1.592]  | 0.123 | 0.185 |
| rs1564483  | BCL2     | A | 0.232 | 0.897 | [0.679,1.187] | 0.448 | 0.543 | [0.296,0.995] | 0.048 | 0.605 | [0.319,1.145] | 0.123 | 0.123 |
| rs8187915  | ALDH1A1  | T | 0.445 | 0.966 | [0.767,1.217] | 0.771 | 0.671 | [0.435,1.036] | 0.072 | 0.695 | [0.437,1.104] | 0.123 | 0.197 |
| rs4526098  | RAD50    | G | 0.049 | 1.024 | [0.517,2.028] | 0.946 | 0.327 | [0.084,1.273] | 0.107 | 0.320 | [0.075,1.364] | 0.123 | 0.265 |
| rs3748433  | CEP250   | T | 0.095 | 0.878 | [0.57,1.353]  | 0.556 | 1.551 | [0.814,2.955] | 0.182 | 1.766 | [0.856,3.64]  | 0.124 | 0.302 |
| rs6752026  | APOB     | A | 0.027 | 0.686 | [0.275,1.713] | 0.420 | 1.758 | [0.675,4.58]  | 0.248 | 2.562 | [0.773,8.496] | 0.124 | 0.301 |
| rs2301159  | SLC10A2  | T | 0.261 | 1.122 | [0.867,1.452] | 0.382 | 0.737 | [0.444,1.222] | 0.236 | 0.657 | [0.384,1.123] | 0.125 | 0.290 |
| rs2193831  | ABCB11   | G | 0.389 | 0.928 | [0.726,1.185] | 0.548 | 1.332 | [0.869,2.042] | 0.188 | 1.436 | [0.905,2.281] | 0.125 | 0.308 |
| rs2976436  | NEFL     | T | 0.414 | 0.989 | [0.772,1.266] | 0.928 | 1.422 | [0.925,2.186] | 0.108 | 1.438 | [0.904,2.288] | 0.125 | 0.262 |
| rs16834521 | MTR      | G | 0.397 | 0.883 | [0.688,1.133] | 0.328 | 1.292 | [0.822,2.029] | 0.267 | 1.463 | [0.9,2.378]   | 0.125 | 0.283 |
| rs2522393  | RAD50    | T | 0.049 | 1.000 | [0.51,1.961]  | 0.999 | 0.329 | [0.087,1.244] | 0.101 | 0.329 | [0.079,1.364] | 0.125 | 0.257 |
| rs2706369  | RAD50    | T | 0.049 | 1.000 | [0.51,1.961]  | 0.999 | 0.329 | [0.087,1.244] | 0.101 | 0.329 | [0.079,1.364] | 0.125 | 0.257 |
| rs10018239 | PPARGC1A | G | 0.386 | 1.038 | [0.819,1.316] | 0.757 | 0.714 | [0.455,1.119] | 0.142 | 0.688 | [0.426,1.11]  | 0.125 | 0.298 |
| rs2522395  | RAD50    | G | 0.047 | 1.117 | [0.566,2.205] | 0.751 | 0.368 | [0.098,1.387] | 0.140 | 0.329 | [0.08,1.363]  | 0.125 | 0.298 |
| rs2706377  | RAD50    | G | 0.047 | 1.115 | [0.565,2.203] | 0.753 | 0.368 | [0.098,1.386] | 0.140 | 0.330 | [0.08,1.364]  | 0.126 | 0.298 |
| rs212086   | ABCC1    | A | 0.170 | 1.096 | [0.812,1.478] | 0.551 | 0.656 | [0.352,1.224] | 0.185 | 0.599 | [0.31,1.155]  | 0.126 | 0.309 |
| rs2287623  | ABCB11   | C | 0.389 | 0.931 | [0.729,1.19]  | 0.569 | 1.335 | [0.872,2.046] | 0.184 | 1.434 | [0.903,2.277] | 0.126 | 0.310 |
| rs880303   | GJA9     | T | 0.377 | 0.716 | [0.556,0.922] | 0.010 | 1.038 | [0.669,1.611] | 0.867 | 1.449 | [0.9,2.333]   | 0.127 | 0.031 |
| rs2267669  | PPARD    | G | 0.161 | 0.767 | [0.547,1.076] | 0.125 | 1.214 | [0.716,2.059] | 0.471 | 1.583 | [0.878,2.854] | 0.127 | 0.201 |
| rs2074087  | ABCC1    | C | 0.162 | 1.387 | [1.019,1.887] | 0.037 | 0.817 | [0.427,1.562] | 0.541 | 0.589 | [0.298,1.164] | 0.128 | 0.078 |
| rs2286194  | HGF      | A | 0.197 | 1.177 | [0.877,1.577] | 0.277 | 0.721 | [0.397,1.31]  | 0.283 | 0.613 | [0.326,1.151] | 0.128 | 0.262 |
| rs2808630  | CRP      | C | 0.258 | 1.307 | [1.007,1.696] | 0.044 | 0.856 | [0.512,1.432] | 0.555 | 0.655 | [0.38,1.13]   | 0.128 | 0.090 |
| rs10509681 | CYP2C8   | C | 0.087 | 1.108 | [0.743,1.653] | 0.615 | 0.486 | [0.174,1.356] | 0.168 | 0.438 | [0.151,1.269] | 0.128 | 0.314 |
| rs10017295 | BST1     | C | 0.280 | 0.800 | [0.613,1.043] | 0.099 | 1.180 | [0.744,1.87]  | 0.483 | 1.475 | [0.894,2.433] | 0.128 | 0.167 |
| rs2243267  | IL4      | C | 0.236 | 1.422 | [1.073,1.883] | 0.014 | 0.881 | [0.489,1.588] | 0.674 | 0.620 | [0.334,1.149] | 0.129 | 0.037 |
| rs11804091 | LEPR     | G | 0.155 | 1.351 | [0.991,1.842] | 0.057 | 0.803 | [0.424,1.521] | 0.501 | 0.594 | [0.304,1.164] | 0.129 | 0.106 |
| rs872723   | SHH      | T | 0.161 | 1.179 | [0.855,1.626] | 0.315 | 1.840 | [1.083,3.125] | 0.024 | 1.560 | [0.878,2.774] | 0.130 | 0.063 |
| rs290861   | DPYD     | G | 0.185 | 1.230 | [0.912,1.658] | 0.176 | 0.749 | [0.408,1.377] | 0.353 | 0.609 | [0.321,1.157] | 0.130 | 0.213 |
| rs993568   | DPYD     | G | 0.481 | 0.860 | [0.682,1.084] | 0.201 | 1.215 | [0.8,1.846]   | 0.361 | 1.413 | [0.902,2.214] | 0.131 | 0.240 |
| rs1799964  | LTA      | C | 0.215 | 0.934 | [0.694,1.258] | 0.653 | 1.396 | [0.867,2.248] | 0.169 | 1.495 | [0.887,2.518] | 0.131 | 0.311 |
| rs11515    | C9orf53  | G | 0.137 | 1.109 | [0.774,1.59]  | 0.573 | 1.812 | [1.011,3.251] | 0.046 | 1.634 | [0.864,3.091] | 0.131 | 0.132 |
| rs2725362  | WRN      | T | 0.448 | 1.001 | [0.79,1.268]  | 0.995 | 0.696 | [0.448,1.082] | 0.107 | 0.696 | [0.434,1.115] | 0.132 | 0.267 |
| rs1615035  | ANKRD29  | G | 0.353 | 1.241 | [0.977,1.575] | 0.076 | 0.859 | [0.549,1.345] | 0.508 | 0.693 | [0.43,1.117]  | 0.132 | 0.137 |
| rs769224   | COMT     | A | 0.049 | 1.175 | [0.695,1.986] | 0.546 | 0.376 | [0.09,1.583]  | 0.182 | 0.320 | [0.073,1.409] | 0.132 | 0.314 |
| rs405509   | APOE     | A | 0.440 | 0.862 | [0.68,1.092]  | 0.219 | 1.218 | [0.803,1.848] | 0.354 | 1.413 | [0.901,2.216] | 0.132 | 0.254 |
| rs1567868  | IL8RA    | C | 0.093 | 1.332 | [0.901,1.969] | 0.150 | 0.694 | [0.31,1.558]  | 0.376 | 0.521 | [0.223,1.218] | 0.133 | 0.197 |
| rs6003     | F13B     | G | 0.174 | 1.129 | [0.8,1.595]   | 0.490 | 0.669 | [0.354,1.265] | 0.216 | 0.592 | [0.299,1.174] | 0.133 | 0.322 |
| rs216321   | VWF      | T | 0.082 | 1.066 | [0.703,1.617] | 0.762 | 1.829 | [0.963,3.471] | 0.065 | 1.715 | [0.848,3.469] | 0.134 | 0.182 |
| rs949037   | BCL2     | T | 0.435 | 0.983 | [0.769,1.255] | 0.889 | 1.418 | [0.907,2.215] | 0.125 | 1.443 | [0.893,2.33]  | 0.134 | 0.291 |
| rs7731453  | HMMR     | A | 0.100 | 0.835 | [0.556,1.252] | 0.382 | 1.429 | [0.757,2.698] | 0.271 | 1.712 | [0.846,3.463] | 0.135 | 0.318 |

|            |              |   |       |       |               |       |       |                |       |       |                |       |       |
|------------|--------------|---|-------|-------|---------------|-------|-------|----------------|-------|-------|----------------|-------|-------|
| rs1514347  | ESR1         | A | 0.224 | 0.990 | [0.746,1.313] | 0.945 | 0.625 | [0.353,1.106]  | 0.107 | 0.631 | [0.345,1.154]  | 0.135 | 0.269 |
| rs4253211  | ERCC6        | C | 0.087 | 0.891 | [0.588,1.349] | 0.585 | 0.395 | [0.142,1.101]  | 0.076 | 0.443 | [0.153,1.288]  | 0.135 | 0.193 |
| rs2161811  | ALDH1A1      | G | 0.449 | 0.976 | [0.776,1.228] | 0.838 | 0.689 | [0.448,1.059]  | 0.089 | 0.705 | [0.445,1.117]  | 0.136 | 0.236 |
| rs3730849  | LIG1         | T | 0.338 | 0.902 | [0.705,1.154] | 0.412 | 1.285 | [0.834,1.979]  | 0.255 | 1.425 | [0.894,2.271]  | 0.137 | 0.320 |
| rs5918     | ITGB3        | C | 0.122 | 0.810 | [0.566,1.159] | 0.249 | 0.411 | [0.175,0.966]  | 0.041 | 0.508 | [0.208,1.24]   | 0.137 | 0.079 |
| rs3322     | LOC100129773 | A | 0.070 | 0.634 | [0.386,1.039] | 0.071 | 1.205 | [0.565,2.566]  | 0.629 | 1.901 | [0.816,4.431]  | 0.137 | 0.149 |
| rs1105880  | UGT1A10      | C | 0.345 | 0.911 | [0.708,1.171] | 0.466 | 1.310 | [0.839,2.045]  | 0.234 | 1.439 | [0.89,2.325]   | 0.138 | 0.328 |
| rs2706358  | RAD50        | A | 0.047 | 1.136 | [0.578,2.232] | 0.711 | 0.384 | [0.1,1.469]    | 0.162 | 0.338 | [0.081,1.415]  | 0.138 | 0.326 |
| rs1799809  | PROC         | G | 0.458 | 0.989 | [0.76,1.286]  | 0.932 | 1.451 | [0.905,2.325]  | 0.122 | 1.468 | [0.884,2.437]  | 0.138 | 0.288 |
| rs751019   | PTK2B        | C | 0.419 | 1.077 | [0.849,1.366] | 0.541 | 1.523 | [0.994,2.336]  | 0.054 | 1.415 | [0.894,2.238]  | 0.138 | 0.146 |
| rs2976437  | NEFL         | G | 0.416 | 0.996 | [0.779,1.274] | 0.973 | 1.413 | [0.919,2.174]  | 0.115 | 1.419 | [0.893,2.257]  | 0.139 | 0.279 |
| rs888580   | ADRB3        | A | 0.349 | 0.888 | [0.694,1.138] | 0.348 | 1.265 | [0.819,1.952]  | 0.289 | 1.424 | [0.892,2.273]  | 0.139 | 0.311 |
| rs2522391  | RAD50        | A | 0.048 | 1.033 | [0.528,2.021] | 0.924 | 0.356 | [0.095,1.335]  | 0.126 | 0.344 | [0.084,1.416]  | 0.139 | 0.298 |
| rs3739942  | KIAA1984     | G | 0.268 | 1.034 | [0.797,1.343] | 0.799 | 1.488 | [0.952,2.327]  | 0.081 | 1.439 | [0.888,2.331]  | 0.139 | 0.218 |
| rs2585     | IGF2         | T | 0.256 | 0.842 | [0.644,1.102] | 0.210 | 1.236 | [0.772,1.979]  | 0.377 | 1.468 | [0.882,2.442]  | 0.139 | 0.259 |
| rs450808   | ABCG1        | A | 0.270 | 0.891 | [0.687,1.158] | 0.389 | 0.595 | [0.36,0.983]   | 0.043 | 0.667 | [0.39,1.141]   | 0.139 | 0.106 |
| rs2740574  | CYP3A4       | G | 0.146 | 1.498 | [0.969,2.317] | 0.069 | 0.842 | [0.425,1.67]   | 0.623 | 0.562 | [0.262,1.207]  | 0.140 | 0.147 |
| rs2306168  | SLCO2B1      | T | 0.072 | 1.162 | [0.694,1.943] | 0.568 | 0.511 | [0.183,1.422]  | 0.198 | 0.440 | [0.148,1.31]   | 0.140 | 0.337 |
| rs299295   | HMMR         | T | 0.248 | 1.020 | [0.781,1.332] | 0.882 | 0.667 | [0.391,1.136]  | 0.136 | 0.654 | [0.371,1.151]  | 0.140 | 0.312 |
| rs1137115  | CYP2A6       | A | 0.251 | 1.127 | [0.861,1.476] | 0.385 | 1.630 | [1.035,2.569]  | 0.035 | 1.447 | [0.884,2.367]  | 0.141 | 0.093 |
| rs16940    | BRCA1        | C | 0.303 | 0.848 | [0.654,1.1]   | 0.215 | 1.223 | [0.78,1.917]   | 0.380 | 1.442 | [0.885,2.349]  | 0.141 | 0.265 |
| rs1060915  | BRCA1        | C | 0.303 | 0.848 | [0.654,1.099] | 0.213 | 1.222 | [0.78,1.915]   | 0.381 | 1.441 | [0.885,2.347]  | 0.141 | 0.264 |
| rs6873545  | GHR          | C | 0.294 | 1.056 | [0.818,1.365] | 0.675 | 0.714 | [0.438,1.166]  | 0.178 | 0.676 | [0.401,1.14]   | 0.142 | 0.337 |
| rs2071048  | HNMT         | C | 0.407 | 0.786 | [0.616,1.004] | 0.054 | 1.116 | [0.724,1.719]  | 0.619 | 1.419 | [0.889,2.264]  | 0.142 | 0.117 |
| rs2297595  | DPYD         | C | 0.074 | 0.785 | [0.497,1.239] | 0.298 | 1.388 | [0.702,2.743]  | 0.345 | 1.769 | [0.825,3.791]  | 0.143 | 0.315 |
| rs1052369  | ANKRD29      | A | 0.486 | 1.212 | [0.956,1.537] | 0.111 | 0.852 | [0.547,1.326]  | 0.477 | 0.703 | [0.438,1.127]  | 0.143 | 0.181 |
| rs1399290  | DPYD         | G | 0.048 | 2.137 | [1.242,3.677] | 0.006 | 0.920 | [0.314,2.692]  | 0.878 | 0.430 | [0.139,1.33]   | 0.143 | 0.020 |
| rs2266691  | CCNH         | G | 0.011 | 0.878 | [0.177,4.359] | 0.874 | 3.938 | [0.838,18.496] | 0.082 | 4.484 | [0.601,33.428] | 0.143 | 0.196 |
| rs2302465  | BST1         | T | 0.102 | 1.188 | [0.828,1.705] | 0.349 | 0.617 | [0.265,1.437]  | 0.263 | 0.519 | [0.216,1.25]   | 0.143 | 0.298 |
| rs715948   | LRP1         | A | 0.297 | 1.120 | [0.87,1.441]  | 0.381 | 1.591 | [1.027,2.463]  | 0.037 | 1.421 | [0.887,2.275]  | 0.144 | 0.097 |
| rs3092906  | ATM          | G | 0.033 | 0.940 | [0.431,2.053] | 0.877 | 0.204 | [0.029,1.461]  | 0.114 | 0.217 | [0.028,1.683]  | 0.144 | 0.286 |
| rs7739752  | PPARD        | T | 0.164 | 0.867 | [0.592,1.269] | 0.464 | 1.442 | [0.772,2.693]  | 0.251 | 1.663 | [0.841,3.289]  | 0.144 | 0.341 |
| rs3100699  | HNMT         | C | 0.037 | 1.833 | [0.845,3.975] | 0.125 | 0.599 | [0.15,2.396]   | 0.469 | 0.327 | [0.073,1.467]  | 0.144 | 0.202 |
| rs2290272  | SLC28A1      | T | 0.358 | 1.056 | [0.831,1.342] | 0.655 | 1.480 | [0.971,2.256]  | 0.068 | 1.402 | [0.891,2.206]  | 0.144 | 0.186 |
| rs2544794  | SULT2B1      | A | 0.171 | 1.016 | [0.748,1.381] | 0.919 | 0.606 | [0.312,1.174]  | 0.137 | 0.596 | [0.297,1.196]  | 0.145 | 0.319 |
| rs914937   | DPYD         | A | 0.048 | 2.129 | [1.237,3.665] | 0.006 | 0.921 | [0.315,2.694]  | 0.880 | 0.432 | [0.14,1.336]   | 0.145 | 0.021 |
| rs10759326 | IKBKAP       | G | 0.259 | 1.243 | [0.949,1.629] | 0.114 | 0.827 | [0.493,1.385]  | 0.470 | 0.665 | [0.384,1.152]  | 0.145 | 0.183 |
| rs6063528  | PTPN1        | A | 0.367 | 1.142 | [0.896,1.456] | 0.285 | 1.607 | [1.047,2.468]  | 0.030 | 1.408 | [0.888,2.231]  | 0.146 | 0.071 |
| rs2228059  | IL15RA       | A | 0.478 | 1.059 | [0.84,1.334]  | 0.629 | 0.756 | [0.495,1.155]  | 0.196 | 0.714 | [0.454,1.124]  | 0.146 | 0.347 |
| rs10018622 | KLHL5        | G | 0.445 | 1.037 | [0.813,1.322] | 0.773 | 1.460 | [0.95,2.245]   | 0.084 | 1.409 | [0.887,2.237]  | 0.146 | 0.225 |
| rs1800331  | FANCA        | T | 0.071 | 0.988 | [0.628,1.555] | 0.960 | 0.396 | [0.12,1.305]   | 0.128 | 0.401 | [0.117,1.376]  | 0.146 | 0.312 |

|            |            |   |       |       |               |       |       |               |       |       |               |       |       |
|------------|------------|---|-------|-------|---------------|-------|-------|---------------|-------|-------|---------------|-------|-------|
| rs231775   | CTLA4      | G | 0.410 | 1.041 | [0.823,1.317] | 0.735 | 1.454 | [0.956,2.213] | 0.080 | 1.397 | [0.89,2.192]  | 0.147 | 0.215 |
| rs10018288 | Intergenic | G | 0.246 | 1.154 | [0.873,1.524] | 0.314 | 0.754 | [0.438,1.296] | 0.306 | 0.653 | [0.368,1.161] | 0.147 | 0.304 |
| rs2058996  | ABCB11     | A | 0.408 | 0.787 | [0.615,1.007] | 0.057 | 1.113 | [0.722,1.717] | 0.627 | 1.415 | [0.885,2.26]  | 0.147 | 0.124 |
| rs11615    | ERCC1      | C | 0.488 | 0.948 | [0.741,1.213] | 0.672 | 1.350 | [0.864,2.109] | 0.188 | 1.424 | [0.883,2.297] | 0.148 | 0.347 |
| rs1344642  | STK36      | A | 0.457 | 1.089 | [0.862,1.375] | 0.476 | 0.775 | [0.505,1.191] | 0.245 | 0.712 | [0.45,1.128]  | 0.148 | 0.346 |
| rs1758566  |            | C | 0.104 | 0.628 | [0.409,0.963] | 0.033 | 0.281 | [0.099,0.794] | 0.017 | 0.447 | [0.15,1.331]  | 0.148 | 0.009 |
| rs6901410  | PPARD      | C | 0.167 | 0.816 | [0.553,1.206] | 0.308 | 1.368 | [0.721,2.594] | 0.337 | 1.676 | [0.832,3.375] | 0.148 | 0.318 |
| rs1295686  | IL13       | A | 0.299 | 1.032 | [0.794,1.342] | 0.813 | 0.684 | [0.405,1.157] | 0.157 | 0.663 | [0.38,1.158]  | 0.148 | 0.337 |
| rs3750050  | PTPN12     | G | 0.195 | 1.006 | [0.752,1.347] | 0.966 | 1.489 | [0.914,2.427] | 0.110 | 1.480 | [0.87,2.517]  | 0.148 | 0.274 |
| rs2234997  | ATM        | A | 0.033 | 0.905 | [0.413,1.981] | 0.803 | 0.200 | [0.028,1.43]  | 0.109 | 0.220 | [0.028,1.714] | 0.148 | 0.275 |
| rs3743258  | IGF1R      | A | 0.307 | 1.000 | [0.764,1.308] | 0.999 | 1.441 | [0.914,2.272] | 0.116 | 1.441 | [0.878,2.366] | 0.149 | 0.284 |
| rs1047840  | EXO1       | A | 0.389 | 1.024 | [0.805,1.303] | 0.846 | 0.718 | [0.457,1.127] | 0.149 | 0.701 | [0.432,1.136] | 0.149 | 0.329 |
| rs3829888  | ABCB11     | C | 0.054 | 1.380 | [0.817,2.331] | 0.228 | 0.537 | [0.156,1.849] | 0.324 | 0.389 | [0.108,1.405] | 0.150 | 0.253 |
| rs1799801  | ERCC4      | C | 0.268 | 0.962 | [0.739,1.254] | 0.777 | 1.377 | [0.877,2.16]  | 0.164 | 1.430 | [0.877,2.331] | 0.151 | 0.338 |
| rs189037   | ATM        | G | 0.492 | 0.986 | [0.78,1.247]  | 0.908 | 0.706 | [0.461,1.08]  | 0.109 | 0.716 | [0.453,1.13]  | 0.151 | 0.275 |
| rs1838066  | MBL2       | G | 0.337 | 0.926 | [0.723,1.186] | 0.542 | 1.306 | [0.846,2.015] | 0.229 | 1.410 | [0.882,2.255] | 0.151 | 0.357 |
| rs2760501  | JUN        | G | 0.202 | 1.146 | [0.796,1.649] | 0.463 | 0.690 | [0.363,1.31]  | 0.257 | 0.602 | [0.301,1.205] | 0.152 | 0.352 |
| rs836802   | MSH3       | G | 0.244 | 0.956 | [0.726,1.258] | 0.748 | 0.616 | [0.35,1.086]  | 0.094 | 0.645 | [0.354,1.175] | 0.152 | 0.244 |
| rs3817074  | BAX        | T | 0.106 | 1.087 | [0.756,1.563] | 0.652 | 0.589 | [0.264,1.312] | 0.195 | 0.542 | [0.234,1.253] | 0.152 | 0.358 |
| rs17882248 | IL5RA      | G | 0.352 | 0.994 | [0.783,1.262] | 0.958 | 0.692 | [0.434,1.103] | 0.121 | 0.696 | [0.424,1.143] | 0.152 | 0.298 |
| rs230521   | NFKB1      | G | 0.404 | 1.159 | [0.913,1.472] | 0.227 | 0.824 | [0.534,1.273] | 0.383 | 0.711 | [0.446,1.134] | 0.152 | 0.279 |
| rs2687079  | CYP3A7     | A | 0.180 | 1.273 | [0.918,1.765] | 0.149 | 0.793 | [0.432,1.456] | 0.455 | 0.623 | [0.326,1.192] | 0.153 | 0.223 |
| rs2687084  | CYP3A7     | G | 0.180 | 1.273 | [0.918,1.765] | 0.149 | 0.793 | [0.432,1.456] | 0.455 | 0.623 | [0.326,1.192] | 0.153 | 0.223 |
| rs1851425  | CYP3A7     | C | 0.180 | 1.271 | [0.917,1.763] | 0.151 | 0.792 | [0.431,1.455] | 0.453 | 0.623 | [0.326,1.192] | 0.153 | 0.224 |
| rs2687078  | CYP3A7     | G | 0.179 | 1.272 | [0.917,1.764] | 0.149 | 0.793 | [0.432,1.456] | 0.454 | 0.623 | [0.326,1.193] | 0.153 | 0.223 |
| rs2740565  | CYP3A7     | A | 0.180 | 1.271 | [0.917,1.763] | 0.150 | 0.792 | [0.432,1.455] | 0.453 | 0.623 | [0.326,1.193] | 0.153 | 0.224 |
| rs2304821  | PTPRB      | A | 0.100 | 1.001 | [0.677,1.48]  | 0.996 | 0.520 | [0.22,1.226]  | 0.135 | 0.519 | [0.211,1.277] | 0.153 | 0.322 |
| rs1409986  | PTGER3     | T | 0.064 | 0.908 | [0.555,1.487] | 0.703 | 0.310 | [0.074,1.299] | 0.109 | 0.341 | [0.078,1.494] | 0.154 | 0.269 |
| rs776742   | CYP3A7     | A | 0.180 | 1.269 | [0.915,1.761] | 0.153 | 0.792 | [0.431,1.453] | 0.451 | 0.624 | [0.326,1.193] | 0.154 | 0.227 |
| rs1201689  | MAPKBP1    | G | 0.370 | 0.867 | [0.662,1.134] | 0.297 | 1.254 | [0.784,2.007] | 0.345 | 1.448 | [0.87,2.408]  | 0.154 | 0.318 |
| rs838827   | IKBKAP     | T | 0.074 | 1.090 | [0.709,1.676] | 0.694 | 0.496 | [0.175,1.405] | 0.187 | 0.455 | [0.154,1.344] | 0.154 | 0.363 |
| rs3547     | XRCC1      | T | 0.406 | 1.106 | [0.872,1.403] | 0.406 | 0.785 | [0.506,1.219] | 0.281 | 0.710 | [0.443,1.138] | 0.154 | 0.346 |
| rs2515363  | CNTF       | C | 0.452 | 1.001 | [0.785,1.276] | 0.992 | 0.703 | [0.446,1.109] | 0.130 | 0.702 | [0.432,1.143] | 0.155 | 0.310 |
| rs2020902  | CASP9      | C | 0.131 | 0.762 | [0.525,1.107] | 0.154 | 1.233 | [0.677,2.247] | 0.493 | 1.618 | [0.834,3.139] | 0.155 | 0.245 |
| rs11247367 | IGF1R      | A | 0.081 | 0.926 | [0.589,1.455] | 0.740 | 1.628 | [0.806,3.287] | 0.174 | 1.757 | [0.808,3.822] | 0.155 | 0.343 |
| rs2272225  | SHFM1      | A | 0.070 | 0.803 | [0.487,1.324] | 0.390 | 1.437 | [0.71,2.907]  | 0.314 | 1.789 | [0.8,3.998]   | 0.156 | 0.360 |
| rs1801516  | ATM        | A | 0.110 | 1.026 | [0.711,1.481] | 0.889 | 1.629 | [0.907,2.927] | 0.103 | 1.587 | [0.838,3.007] | 0.156 | 0.262 |
| rs8177877  | GCSH       | G | 0.024 | 1.637 | [0.74,3.619]  | 0.224 | 0.532 | [0.122,2.322] | 0.401 | 0.325 | [0.069,1.538] | 0.156 | 0.274 |
| rs2068604  | PON2       | T | 0.242 | 1.204 | [0.916,1.582] | 0.183 | 0.806 | [0.478,1.358] | 0.417 | 0.669 | [0.384,1.167] | 0.157 | 0.251 |
| rs4917636  | CYP2C9     | G | 0.099 | 1.023 | [0.701,1.493] | 0.905 | 0.512 | [0.203,1.287] | 0.154 | 0.500 | [0.191,1.306] | 0.157 | 0.350 |
| rs28948385 | UGT1A8     | G | 0.052 | 0.491 | [0.225,1.068] | 0.073 | 1.154 | [0.436,3.052] | 0.773 | 2.351 | [0.719,7.687] | 0.157 | 0.179 |

|            |          |   |       |       |               |       |       |               |       |       |               |       |       |
|------------|----------|---|-------|-------|---------------|-------|-------|---------------|-------|-------|---------------|-------|-------|
| rs10475    | ATF3     | T | 0.233 | 0.976 | [0.738,1.292] | 0.867 | 0.626 | [0.35,1.122]  | 0.115 | 0.641 | [0.347,1.187] | 0.157 | 0.290 |
| rs2237586  | PON2     | T | 0.222 | 1.239 | [0.939,1.635] | 0.130 | 0.822 | [0.482,1.404] | 0.474 | 0.664 | [0.376,1.172] | 0.158 | 0.206 |
| rs2069810  | IL5      | G | 0.057 | 0.950 | [0.522,1.729] | 0.867 | 0.387 | [0.121,1.237] | 0.110 | 0.408 | [0.117,1.417] | 0.158 | 0.278 |
| rs1471000  | HNMT     | C | 0.026 | 1.939 | [0.865,4.348] | 0.108 | 0.560 | [0.11,2.856]  | 0.485 | 0.289 | [0.051,1.623] | 0.158 | 0.182 |
| rs397589   | CBS      | G | 0.498 | 0.977 | [0.772,1.237] | 0.846 | 0.698 | [0.451,1.08]  | 0.106 | 0.714 | [0.447,1.14]  | 0.159 | 0.271 |
| rs160632   | RIOK2    | G | 0.425 | 1.143 | [0.906,1.441] | 0.260 | 0.820 | [0.533,1.262] | 0.367 | 0.718 | [0.453,1.138] | 0.159 | 0.302 |
| rs1800590  | LPL      | G | 0.084 | 1.296 | [0.809,2.077] | 0.280 | 0.681 | [0.297,1.56]  | 0.364 | 0.525 | [0.215,1.286] | 0.159 | 0.316 |
| rs1061040  | SLC7A7   | A | 0.168 | 1.022 | [0.721,1.446] | 0.905 | 0.603 | [0.303,1.199] | 0.150 | 0.591 | [0.284,1.228] | 0.159 | 0.339 |
| rs4833095  | TLR1     | C | 0.362 | 1.150 | [0.882,1.5]   | 0.303 | 0.790 | [0.485,1.285] | 0.343 | 0.687 | [0.408,1.158] | 0.159 | 0.322 |
| rs17098707 | GRK5     | T | 0.056 | 0.502 | [0.245,1.029] | 0.060 | 1.087 | [0.447,2.644] | 0.854 | 2.166 | [0.739,6.35]  | 0.159 | 0.157 |
| rs7803574  | SHFM1    | T | 0.070 | 0.804 | [0.487,1.325] | 0.391 | 1.431 | [0.707,2.897] | 0.319 | 1.782 | [0.797,3.983] | 0.159 | 0.366 |
| rs1364726  | XRCC5    | T | 0.136 | 1.325 | [0.946,1.857] | 0.102 | 0.797 | [0.407,1.562] | 0.509 | 0.602 | [0.296,1.222] | 0.160 | 0.175 |
| rs11669576 | LDLR     | A | 0.069 | 0.591 | [0.335,1.042] | 0.069 | 1.147 | [0.513,2.567] | 0.738 | 1.942 | [0.769,4.903] | 0.160 | 0.163 |
| rs4148221  | ABCG8    | T | 0.167 | 1.270 | [0.939,1.718] | 0.120 | 0.799 | [0.431,1.479] | 0.475 | 0.629 | [0.329,1.202] | 0.161 | 0.193 |
| rs915927   | XRCC1    | G | 0.429 | 1.135 | [0.898,1.434] | 0.289 | 0.814 | [0.528,1.255] | 0.352 | 0.717 | [0.451,1.141] | 0.161 | 0.318 |
| rs2070682  | SERPINE1 | C | 0.429 | 1.095 | [0.863,1.39]  | 0.453 | 0.785 | [0.509,1.211] | 0.274 | 0.717 | [0.45,1.141]  | 0.161 | 0.364 |
| rs7751481  | PPARD    | A | 0.310 | 0.767 | [0.585,1.005] | 0.054 | 1.091 | [0.696,1.711] | 0.705 | 1.423 | [0.869,2.33]  | 0.161 | 0.128 |
| rs2687081  | CYP3A7   | C | 0.180 | 1.275 | [0.919,1.768] | 0.145 | 0.802 | [0.437,1.473] | 0.477 | 0.629 | [0.329,1.204] | 0.162 | 0.227 |
| rs2299267  | PON2     | G | 0.168 | 0.913 | [0.659,1.264] | 0.583 | 0.546 | [0.276,1.08]  | 0.082 | 0.598 | [0.291,1.229] | 0.162 | 0.207 |
| rs8192707  | PLCG1    | G | 0.139 | 1.169 | [0.849,1.611] | 0.338 | 0.703 | [0.357,1.387] | 0.309 | 0.601 | [0.295,1.226] | 0.162 | 0.327 |
| rs2241339  | ABCB11   | T | 0.113 | 1.184 | [0.81,1.732]  | 0.383 | 0.649 | [0.292,1.443] | 0.289 | 0.548 | [0.236,1.274] | 0.162 | 0.345 |
| rs1471001  | HNMT     | G | 0.026 | 1.939 | [0.864,4.348] | 0.108 | 0.571 | [0.113,2.88]  | 0.498 | 0.295 | [0.053,1.638] | 0.163 | 0.186 |
| rs4148211  | ABCG8    | G | 0.361 | 1.050 | [0.82,1.344]  | 0.699 | 0.728 | [0.447,1.184] | 0.201 | 0.693 | [0.414,1.161] | 0.164 | 0.377 |
| rs1496496  | IGFBP3   | G | 0.382 | 0.988 | [0.774,1.26]  | 0.923 | 0.698 | [0.442,1.103] | 0.123 | 0.706 | [0.433,1.153] | 0.164 | 0.304 |
| rs17006837 | HELQ     | G | 0.086 | 1.388 | [0.748,2.576] | 0.299 | 0.638 | [0.238,1.709] | 0.372 | 0.460 | [0.154,1.374] | 0.164 | 0.342 |
| rs12828016 | WNK1     | T | 0.384 | 1.000 | [0.78,1.282]  | 0.998 | 0.701 | [0.439,1.12]  | 0.137 | 0.701 | [0.424,1.157] | 0.164 | 0.325 |
| rs2855262  | SOD3     | T | 0.441 | 1.011 | [0.785,1.303] | 0.931 | 0.704 | [0.436,1.136] | 0.150 | 0.696 | [0.418,1.161] | 0.165 | 0.342 |
| rs35605    | ABCC1    | T | 0.168 | 1.484 | [1.093,2.013] | 0.011 | 0.941 | [0.512,1.731] | 0.845 | 0.634 | [0.334,1.206] | 0.165 | 0.035 |
| rs769217   | CAT      | T | 0.214 | 0.935 | [0.7,1.251]   | 0.652 | 0.596 | [0.326,1.088] | 0.092 | 0.637 | [0.337,1.205] | 0.165 | 0.234 |
| rs610529   | ALDH1A1  | C | 0.462 | 0.967 | [0.771,1.213] | 0.772 | 1.320 | [0.877,1.988] | 0.184 | 1.365 | [0.879,2.119] | 0.165 | 0.369 |
| rs316003   | SLC22A2  | C | 0.288 | 1.039 | [0.793,1.361] | 0.780 | 0.699 | [0.414,1.182] | 0.182 | 0.673 | [0.384,1.178] | 0.165 | 0.371 |
| rs2239185  | VDR      | C | 0.462 | 1.170 | [0.923,1.485] | 0.195 | 0.840 | [0.542,1.302] | 0.436 | 0.718 | [0.449,1.147] | 0.166 | 0.270 |
| rs17563    | BMP4     | C | 0.496 | 0.843 | [0.672,1.058] | 0.140 | 1.154 | [0.762,1.747] | 0.499 | 1.368 | [0.878,2.133] | 0.166 | 0.226 |
| rs1057910  | CYP2C9   | C | 0.053 | 0.484 | [0.261,0.9]   | 0.022 | 1.023 | [0.407,2.573] | 0.961 | 2.113 | [0.732,6.093] | 0.166 | 0.069 |
| rs1057911  | CYP2C9   | T | 0.053 | 0.484 | [0.261,0.9]   | 0.022 | 1.023 | [0.407,2.573] | 0.961 | 2.113 | [0.732,6.093] | 0.166 | 0.069 |
| rs9332100  | CYP2C9   | T | 0.096 | 1.023 | [0.697,1.501] | 0.906 | 0.518 | [0.205,1.308] | 0.164 | 0.506 | [0.193,1.329] | 0.167 | 0.367 |
| rs651852   | BHMT     | A | 0.443 | 0.969 | [0.765,1.228] | 0.797 | 1.336 | [0.875,2.039] | 0.179 | 1.378 | [0.874,2.172] | 0.167 | 0.367 |
| rs2075685  | TMEM167  | T | 0.470 | 0.980 | [0.773,1.242] | 0.866 | 0.703 | [0.452,1.091] | 0.116 | 0.717 | [0.447,1.149] | 0.167 | 0.290 |
| rs643788   | DPAGT1   | C | 0.401 | 1.035 | [0.814,1.317] | 0.779 | 0.738 | [0.47,1.157]  | 0.185 | 0.713 | [0.441,1.153] | 0.167 | 0.373 |
| rs8551     | DPAGT1   | T | 0.402 | 1.035 | [0.814,1.317] | 0.779 | 0.738 | [0.47,1.157]  | 0.185 | 0.713 | [0.441,1.153] | 0.167 | 0.373 |
| rs1060463  | CYP4F11  | G | 0.443 | 1.085 | [0.863,1.363] | 0.485 | 0.788 | [0.516,1.203] | 0.270 | 0.727 | [0.462,1.143] | 0.167 | 0.379 |

|            |          |   |       |       |               |       |       |               |       |       |                |       |       |
|------------|----------|---|-------|-------|---------------|-------|-------|---------------|-------|-------|----------------|-------|-------|
| rs20581    | LIG1     | T | 0.405 | 1.301 | [1.032,1.642] | 0.026 | 0.942 | [0.613,1.448] | 0.787 | 0.724 | [0.458,1.145]  | 0.168 | 0.071 |
| rs1536474  | RXRA     | T | 0.332 | 1.020 | [0.76,1.37]   | 0.894 | 0.673 | [0.388,1.166] | 0.158 | 0.659 | [0.365,1.191]  | 0.168 | 0.351 |
| rs2295275  | TRERF1   | A | 0.058 | 0.727 | [0.422,1.251] | 0.249 | 1.360 | [0.622,2.974] | 0.441 | 1.872 | [0.768,4.562]  | 0.168 | 0.333 |
| rs1058172  | CYP2D6   | A | 0.128 | 1.138 | [0.779,1.663] | 0.503 | 1.855 | [0.974,3.534] | 0.060 | 1.630 | [0.814,3.264]  | 0.168 | 0.159 |
| rs348457   | ALDH1A1  | G | 0.462 | 0.968 | [0.772,1.214] | 0.778 | 1.319 | [0.876,1.987] | 0.185 | 1.363 | [0.877,2.117]  | 0.168 | 0.373 |
| rs10857971 | PPM1J    | C | 0.017 | 2.109 | [0.821,5.416] | 0.121 | 0.440 | [0.052,3.707] | 0.450 | 0.209 | [0.022,1.942]  | 0.169 | 0.194 |
| rs11765552 | LMTK2    | A | 0.425 | 0.741 | [0.58,0.948]  | 0.017 | 1.029 | [0.667,1.588] | 0.896 | 1.388 | [0.87,2.216]   | 0.169 | 0.053 |
| rs529948   | NFKBIE   | A | 0.122 | 1.524 | [1.112,2.089] | 0.009 | 0.933 | [0.476,1.828] | 0.839 | 0.612 | [0.304,1.232]  | 0.169 | 0.027 |
| rs533984   | MRE11A   | A | 0.444 | 1.082 | [0.856,1.369] | 0.510 | 0.784 | [0.511,1.203] | 0.265 | 0.725 | [0.458,1.147]  | 0.169 | 0.384 |
| rs17057718 | IL17RD   | T | 0.157 | 1.311 | [0.952,1.805] | 0.097 | 0.795 | [0.403,1.569] | 0.509 | 0.607 | [0.297,1.237]  | 0.169 | 0.171 |
| rs1137101  | LEPR     | G | 0.482 | 1.144 | [0.905,1.445] | 0.262 | 0.832 | [0.546,1.269] | 0.394 | 0.728 | [0.462,1.145]  | 0.169 | 0.317 |
| rs2279103  | CTDP1    | T | 0.149 | 1.104 | [0.805,1.515] | 0.539 | 1.629 | [0.976,2.719] | 0.062 | 1.476 | [0.846,2.573]  | 0.170 | 0.166 |
| rs7242     | SERPINE1 | G | 0.435 | 1.062 | [0.836,1.347] | 0.623 | 0.767 | [0.498,1.182] | 0.230 | 0.723 | [0.454,1.15]   | 0.170 | 0.391 |
| rs241424   | TAP2     | T | 0.498 | 1.224 | [0.969,1.546] | 0.090 | 1.687 | [1.098,2.593] | 0.017 | 1.378 | [0.871,2.182]  | 0.171 | 0.023 |
| rs2606345  | CYP1A1   | C | 0.457 | 1.119 | [0.88,1.424]  | 0.358 | 0.800 | [0.511,1.254] | 0.331 | 0.715 | [0.443,1.155]  | 0.171 | 0.355 |
| rs3756772  | FRK      | A | 0.403 | 1.112 | [0.881,1.405] | 0.372 | 1.530 | [0.998,2.346] | 0.051 | 1.376 | [0.871,2.172]  | 0.171 | 0.123 |
| rs2288087  | ALDH1A1  | T | 0.451 | 0.963 | [0.764,1.216] | 0.754 | 0.697 | [0.451,1.076] | 0.103 | 0.723 | [0.454,1.151]  | 0.171 | 0.264 |
| rs16859180 | STK36    | T | 0.051 | 1.016 | [0.594,1.737] | 0.954 | 0.247 | [0.034,1.818] | 0.170 | 0.243 | [0.032,1.855]  | 0.173 | 0.385 |
| rs2298037  | CYP2C9   | T | 0.146 | 1.109 | [0.802,1.532] | 0.532 | 0.667 | [0.332,1.34]  | 0.255 | 0.602 | [0.29,1.249]   | 0.173 | 0.387 |
| rs3748338  | RNASE4   | T | 0.142 | 0.887 | [0.599,1.315] | 0.551 | 0.467 | [0.194,1.124] | 0.089 | 0.526 | [0.209,1.326]  | 0.173 | 0.216 |
| rs2237585  | PON2     | C | 0.476 | 0.986 | [0.779,1.248] | 0.909 | 0.719 | [0.47,1.099]  | 0.127 | 0.729 | [0.462,1.149]  | 0.173 | 0.311 |
| rs2790     | TYMS     | G | 0.221 | 0.803 | [0.596,1.081] | 0.148 | 1.169 | [0.714,1.914] | 0.535 | 1.456 | [0.848,2.502]  | 0.173 | 0.250 |
| rs11003125 | MBL2     | C | 0.335 | 0.949 | [0.741,1.215] | 0.680 | 1.316 | [0.852,2.032] | 0.216 | 1.386 | [0.866,2.218]  | 0.173 | 0.392 |
| rs9332093  | CYP2C9   | G | 0.055 | 0.472 | [0.254,0.877] | 0.018 | 0.986 | [0.392,2.484] | 0.976 | 2.089 | [0.723,6.038]  | 0.174 | 0.058 |
| rs513349   | BAK1     | G | 0.466 | 1.092 | [0.865,1.38]  | 0.459 | 0.786 | [0.503,1.227] | 0.289 | 0.719 | [0.447,1.157]  | 0.174 | 0.384 |
| rs1020678  | HNMT     | G | 0.398 | 0.726 | [0.568,0.928] | 0.010 | 1.000 | [0.653,1.531] | 0.999 | 1.378 | [0.868,2.189]  | 0.174 | 0.036 |
| rs2074113  | AHR      | A | 0.113 | 0.902 | [0.613,1.329] | 0.602 | 1.427 | [0.786,2.59]  | 0.243 | 1.581 | [0.816,3.064]  | 0.175 | 0.396 |
| rs10264715 | NPC1L1   | A | 0.192 | 0.790 | [0.582,1.073] | 0.131 | 1.170 | [0.694,1.971] | 0.556 | 1.480 | [0.84,2.608]   | 0.175 | 0.231 |
| rs6714486  | UGT1A10  | A | 0.078 | 1.217 | [0.788,1.878] | 0.375 | 0.623 | [0.247,1.571] | 0.316 | 0.512 | [0.194,1.353]  | 0.177 | 0.360 |
| rs1799966  | BRCA1    | G | 0.313 | 0.878 | [0.681,1.133] | 0.318 | 1.221 | [0.784,1.901] | 0.376 | 1.390 | [0.86,2.247]   | 0.178 | 0.357 |
| rs1799725  | SOD2     | C | 0.489 | 1.275 | [1.007,1.614] | 0.044 | 0.929 | [0.605,1.428] | 0.737 | 0.729 | [0.459,1.156]  | 0.179 | 0.108 |
| rs2291462  | IL17RD   | T | 0.180 | 0.848 | [0.621,1.157] | 0.298 | 1.239 | [0.749,2.051] | 0.404 | 1.462 | [0.84,2.544]   | 0.179 | 0.357 |
| rs8187755  | SLC28A1  | T | 0.015 | 0.555 | [0.161,1.916] | 0.351 | 1.732 | [0.476,6.294] | 0.404 | 3.122 | [0.592,16.458] | 0.180 | 0.404 |
| rs910416   | ESR1     | C | 0.494 | 0.902 | [0.716,1.137] | 0.384 | 0.659 | [0.43,1.011]  | 0.056 | 0.731 | [0.462,1.155]  | 0.180 | 0.134 |
| rs2974938  | PPP1R3A  | T | 0.020 | 1.203 | [0.535,2.704] | 0.655 | 0.266 | [0.032,2.241] | 0.223 | 0.221 | [0.024,2.005]  | 0.180 | 0.405 |
| rs207440   | XDH      | A | 0.056 | 1.750 | [1.098,2.789] | 0.019 | 0.831 | [0.29,2.382]  | 0.731 | 0.475 | [0.16,1.411]   | 0.180 | 0.050 |
| rs2365778  | SRD5A2   | C | 0.483 | 1.041 | [0.822,1.32]  | 0.737 | 0.756 | [0.488,1.17]  | 0.210 | 0.726 | [0.454,1.16]   | 0.180 | 0.401 |
| rs359974   | IHH      | C | 0.177 | 0.936 | [0.673,1.301] | 0.693 | 1.428 | [0.807,2.526] | 0.221 | 1.526 | [0.821,2.834]  | 0.181 | 0.403 |
| rs7744392  | PPARD    | G | 0.084 | 0.878 | [0.543,1.418] | 0.594 | 1.527 | [0.733,3.184] | 0.259 | 1.740 | [0.773,3.918]  | 0.181 | 0.408 |
| rs158634   | DPYD     | G | 0.190 | 1.237 | [0.922,1.659] | 0.156 | 0.816 | [0.458,1.454] | 0.489 | 0.660 | [0.358,1.215]  | 0.182 | 0.245 |
| rs4646312  | COMT     | C | 0.330 | 0.891 | [0.692,1.146] | 0.368 | 1.238 | [0.79,1.94]   | 0.352 | 1.390 | [0.857,2.256]  | 0.182 | 0.378 |

|            |         |   |       |       |               |       |       |               |       |       |                |       |       |
|------------|---------|---|-------|-------|---------------|-------|-------|---------------|-------|-------|----------------|-------|-------|
| rs2235040  | ABCB1   | A | 0.114 | 1.068 | [0.727,1.57]  | 0.736 | 1.653 | [0.926,2.948] | 0.089 | 1.547 | [0.814,2.94]   | 0.183 | 0.235 |
| rs230496   | NFKB1   | G | 0.400 | 1.158 | [0.912,1.471] | 0.229 | 0.844 | [0.547,1.303] | 0.444 | 0.729 | [0.457,1.161]  | 0.183 | 0.312 |
| rs3218005  | CDKN2B  | G | 0.127 | 0.886 | [0.604,1.301] | 0.538 | 1.403 | [0.76,2.588]  | 0.279 | 1.582 | [0.804,3.114]  | 0.184 | 0.414 |
| rs5276     | PTGS2   | A | 0.025 | 1.366 | [0.656,2.847] | 0.405 | 0.341 | [0.047,2.464] | 0.286 | 0.250 | [0.032,1.936]  | 0.184 | 0.368 |
| rs769218   | CAT     | A | 0.205 | 0.893 | [0.663,1.203] | 0.457 | 0.573 | [0.309,1.065] | 0.078 | 0.642 | [0.333,1.236]  | 0.185 | 0.183 |
| rs1800471  | TGFB1   | C | 0.071 | 1.449 | [0.927,2.265] | 0.103 | 0.729 | [0.275,1.934] | 0.525 | 0.503 | [0.182,1.391]  | 0.186 | 0.184 |
| rs17612126 | IGHMBP2 | A | 0.260 | 1.035 | [0.787,1.36]  | 0.805 | 1.460 | [0.91,2.341]  | 0.117 | 1.410 | [0.848,2.346]  | 0.186 | 0.292 |
| rs734351   | IGF2    | C | 0.386 | 1.043 | [0.826,1.317] | 0.721 | 1.415 | [0.928,2.159] | 0.107 | 1.357 | [0.864,2.131]  | 0.186 | 0.271 |
| rs8827     | SPRED2  | C | 0.255 | 1.210 | [0.923,1.588] | 0.168 | 0.831 | [0.492,1.404] | 0.488 | 0.686 | [0.393,1.199]  | 0.186 | 0.262 |
| rs1799811  | GSTP1   | T | 0.072 | 0.941 | [0.604,1.465] | 0.788 | 0.414 | [0.128,1.342] | 0.142 | 0.440 | [0.131,1.485]  | 0.186 | 0.337 |
| rs689470   | PTGS2   | T | 0.099 | 1.182 | [0.747,1.87]  | 0.476 | 0.641 | [0.275,1.491] | 0.302 | 0.542 | [0.218,1.348]  | 0.188 | 0.410 |
| rs2972164  | PPARG   | T | 0.498 | 1.162 | [0.907,1.487] | 0.234 | 0.838 | [0.533,1.319] | 0.445 | 0.722 | [0.444,1.173]  | 0.188 | 0.319 |
| rs212091   | ABCC1   | G | 0.148 | 1.093 | [0.79,1.512]  | 0.591 | 0.686 | [0.355,1.324] | 0.261 | 0.627 | [0.313,1.257]  | 0.188 | 0.419 |
| rs12720855 | APOB    | C | 0.017 | 1.942 | [0.816,4.622] | 0.133 | 0.463 | [0.058,3.681] | 0.466 | 0.238 | [0.028,2.021]  | 0.189 | 0.209 |
| rs12713450 | APOB    | T | 0.017 | 0.509 | [0.138,1.879] | 0.311 | 1.679 | [0.411,6.866] | 0.471 | 3.297 | [0.557,19.524] | 0.189 | 0.408 |
| rs1801105  |         | T | 0.091 | 0.651 | [0.418,1.015] | 0.058 | 1.103 | [0.544,2.236] | 0.785 | 1.694 | [0.772,3.716]  | 0.189 | 0.146 |
| rs7663494  | DCTD    | G | 0.331 | 0.954 | [0.745,1.222] | 0.709 | 1.302 | [0.848,1.999] | 0.228 | 1.364 | [0.858,2.17]   | 0.189 | 0.416 |
| rs2305030  | LTK     | T | 0.124 | 1.300 | [0.916,1.844] | 0.142 | 0.787 | [0.385,1.606] | 0.510 | 0.605 | [0.286,1.282]  | 0.190 | 0.233 |
| rs10082466 | MBL2    | G | 0.270 | 0.999 | [0.77,1.297]  | 0.996 | 0.698 | [0.422,1.155] | 0.162 | 0.698 | [0.408,1.196]  | 0.191 | 0.371 |
| rs2286233  | PON2    | T | 0.153 | 0.896 | [0.636,1.262] | 0.531 | 1.344 | [0.773,2.338] | 0.294 | 1.500 | [0.817,2.755]  | 0.191 | 0.424 |
| rs348458   | ALDH1A1 | A | 0.466 | 0.970 | [0.774,1.217] | 0.794 | 1.303 | [0.864,1.965] | 0.207 | 1.342 | [0.863,2.087]  | 0.191 | 0.410 |
| rs11574790 | IL12B   | T | 0.115 | 1.153 | [0.814,1.633] | 0.425 | 0.693 | [0.335,1.433] | 0.323 | 0.602 | [0.281,1.289]  | 0.191 | 0.394 |
| rs1045642  | ABCB1   | T | 0.475 | 0.880 | [0.692,1.12]  | 0.299 | 0.643 | [0.414,0.999] | 0.049 | 0.731 | [0.456,1.171]  | 0.192 | 0.108 |
| rs730722   | CHST3   | G | 0.093 | 1.467 | [0.999,2.153] | 0.051 | 0.849 | [0.391,1.847] | 0.681 | 0.579 | [0.255,1.317]  | 0.193 | 0.119 |
| rs2153629  | CYP2C9  | G | 0.095 | 1.024 | [0.692,1.516] | 0.906 | 0.538 | [0.213,1.36]  | 0.190 | 0.526 | [0.2,1.383]    | 0.193 | 0.410 |
| rs12713675 | APOB    | A | 0.017 | 1.942 | [0.816,4.623] | 0.134 | 0.469 | [0.059,3.731] | 0.474 | 0.242 | [0.028,2.049]  | 0.193 | 0.212 |
| rs1042031  | APOB    | A | 0.174 | 0.948 | [0.695,1.294] | 0.738 | 1.374 | [0.824,2.291] | 0.224 | 1.449 | [0.829,2.533]  | 0.193 | 0.417 |
| rs1060250  | SLC7A5  | G | 0.011 | 3.077 | [1.155,8.201] | 0.025 | 0.707 | [0.082,6.134] | 0.753 | 0.230 | [0.025,2.115]  | 0.194 | 0.063 |
| rs4619     | IGFBP1  | G | 0.384 | 1.015 | [0.799,1.289] | 0.906 | 0.738 | [0.471,1.157] | 0.185 | 0.728 | [0.45,1.176]   | 0.194 | 0.398 |
| rs28899170 | UGT1A10 | A | 0.281 | 1.019 | [0.78,1.33]   | 0.892 | 1.408 | [0.897,2.21]  | 0.137 | 1.382 | [0.848,2.254]  | 0.194 | 0.330 |
| rs6671692  | FMO2    | A | 0.028 | 1.346 | [0.6,3.021]   | 0.471 | 0.323 | [0.041,2.55]  | 0.284 | 0.240 | [0.028,2.077]  | 0.195 | 0.406 |
| rs7536646  | FMO2    | A | 0.028 | 1.347 | [0.601,3.023] | 0.469 | 0.324 | [0.041,2.553] | 0.285 | 0.240 | [0.028,2.077]  | 0.195 | 0.406 |
| rs1042580  | THBD    | G | 0.353 | 1.268 | [0.994,1.618] | 0.056 | 0.921 | [0.587,1.447] | 0.722 | 0.726 | [0.448,1.178]  | 0.195 | 0.132 |
| rs1801249  | ATP7B   | T | 0.419 | 1.307 | [1.027,1.664] | 0.029 | 0.959 | [0.619,1.485] | 0.850 | 0.733 | [0.458,1.173]  | 0.195 | 0.082 |
| rs4646091  | CASP9   | G | 0.244 | 0.899 | [0.674,1.199] | 0.469 | 1.279 | [0.782,2.091] | 0.327 | 1.422 | [0.833,2.43]   | 0.197 | 0.426 |
| rs10979601 | IKBKAP  | T | 0.254 | 1.241 | [0.947,1.625] | 0.117 | 0.870 | [0.523,1.445] | 0.590 | 0.701 | [0.408,1.203]  | 0.197 | 0.218 |
| rs2242480  | CYP3A4  | T | 0.218 | 1.394 | [1.006,1.93]  | 0.046 | 0.926 | [0.518,1.653] | 0.794 | 0.664 | [0.356,1.237]  | 0.197 | 0.116 |
| rs2299255  | PON1    | C | 0.136 | 1.376 | [0.997,1.899] | 0.052 | 0.890 | [0.475,1.668] | 0.716 | 0.647 | [0.333,1.255]  | 0.198 | 0.123 |
| rs1800469  | B9D2    | T | 0.322 | 0.979 | [0.751,1.276] | 0.874 | 1.375 | [0.851,2.22]  | 0.193 | 1.405 | [0.837,2.356]  | 0.198 | 0.406 |
| rs35604    | ABCC1   | G | 0.167 | 1.445 | [1.067,1.957] | 0.017 | 0.948 | [0.515,1.744] | 0.863 | 0.656 | [0.345,1.247]  | 0.198 | 0.052 |
| rs8187758  | SLC28A1 | A | 0.236 | 0.939 | [0.71,1.24]   | 0.656 | 1.317 | [0.818,2.121] | 0.256 | 1.404 | [0.837,2.354]  | 0.198 | 0.436 |

|            |          |   |       |       |               |       |       |               |       |       |               |       |       |
|------------|----------|---|-------|-------|---------------|-------|-------|---------------|-------|-------|---------------|-------|-------|
| rs3757280  | HSP90AB1 | C | 0.081 | 0.984 | [0.644,1.505] | 0.941 | 0.483 | [0.17,1.375]  | 0.173 | 0.491 | [0.166,1.453] | 0.198 | 0.393 |
| rs11537643 | VWF      | A | 0.034 | 1.290 | [0.62,2.685]  | 0.496 | 0.438 | [0.092,2.074] | 0.298 | 0.339 | [0.065,1.765] | 0.199 | 0.425 |
| rs6886047  | GHR      | T | 0.283 | 1.040 | [0.803,1.347] | 0.767 | 0.736 | [0.448,1.209] | 0.226 | 0.708 | [0.417,1.201] | 0.200 | 0.433 |
| rs281432   | ICAM1    | C | 0.492 | 1.051 | [0.832,1.329] | 0.675 | 0.782 | [0.512,1.194] | 0.254 | 0.744 | [0.472,1.17]  | 0.200 | 0.439 |
| rs732774   | ATP7B    | G | 0.421 | 1.310 | [1.033,1.661] | 0.026 | 0.965 | [0.622,1.495] | 0.872 | 0.736 | [0.46,1.177]  | 0.201 | 0.074 |
| rs6888011  | ADRB2    | C | 0.350 | 0.886 | [0.688,1.143] | 0.352 | 1.210 | [0.778,1.881] | 0.397 | 1.365 | [0.847,2.201] | 0.201 | 0.399 |
| rs2243250  | IL4      | T | 0.270 | 1.277 | [0.978,1.667] | 0.072 | 0.886 | [0.521,1.505] | 0.654 | 0.694 | [0.396,1.216] | 0.201 | 0.156 |
| rs2274419  | MUSK     | T | 0.123 | 1.434 | [1.029,2]     | 0.033 | 0.899 | [0.453,1.785] | 0.761 | 0.627 | [0.306,1.285] | 0.202 | 0.086 |
| rs2049110  | DPYD     | A | 0.017 | 1.805 | [0.716,4.551] | 0.211 | 0.431 | [0.052,3.598] | 0.437 | 0.239 | [0.026,2.163] | 0.203 | 0.292 |
| rs9306354  | XRCC6    | T | 0.043 | 0.717 | [0.351,1.464] | 0.362 | 0.249 | [0.053,1.156] | 0.076 | 0.347 | [0.068,1.773] | 0.203 | 0.157 |
| rs1780196  | PDSS1    | A | 0.143 | 1.005 | [0.725,1.393] | 0.977 | 1.456 | [0.863,2.458] | 0.159 | 1.450 | [0.818,2.569] | 0.204 | 0.364 |
| rs4987310  | SELL     | T | 0.177 | 0.917 | [0.668,1.258] | 0.589 | 1.325 | [0.788,2.227] | 0.289 | 1.445 | [0.819,2.55]  | 0.204 | 0.446 |
| rs1076150  | DBH      | G | 0.482 | 1.038 | [0.822,1.31]  | 0.755 | 0.776 | [0.511,1.178] | 0.234 | 0.748 | [0.477,1.171] | 0.204 | 0.438 |
| rs2120132  | MBL2     | C | 0.269 | 0.996 | [0.767,1.293] | 0.977 | 0.703 | [0.424,1.165] | 0.171 | 0.705 | [0.412,1.209] | 0.204 | 0.388 |
| rs3761142  | GSS      | A | 0.289 | 0.908 | [0.704,1.172] | 0.460 | 1.234 | [0.798,1.911] | 0.345 | 1.359 | [0.846,2.183] | 0.205 | 0.435 |
| rs2306508  | FNDC8    | A | 0.395 | 0.896 | [0.706,1.137] | 0.368 | 1.215 | [0.783,1.887] | 0.385 | 1.356 | [0.847,2.171] | 0.205 | 0.403 |
| rs2072374  | NCAPD2   | T | 0.228 | 0.623 | [0.46,0.842]  | 0.002 | 0.905 | [0.532,1.54]  | 0.713 | 1.454 | [0.815,2.593] | 0.205 | 0.009 |
| rs3847262  | TPD52L3  | T | 0.073 | 0.835 | [0.517,1.349] | 0.461 | 0.396 | [0.132,1.189] | 0.099 | 0.474 | [0.15,1.503]  | 0.205 | 0.217 |
| rs1800392  | WRN      | T | 0.438 | 0.993 | [0.785,1.256] | 0.951 | 0.733 | [0.473,1.136] | 0.165 | 0.739 | [0.462,1.18]  | 0.205 | 0.378 |
| rs2856585  | ABCC6    | A | 0.078 | 1.149 | [0.671,1.966] | 0.613 | 0.496 | [0.144,1.712] | 0.267 | 0.432 | [0.118,1.582] | 0.205 | 0.445 |
| rs1946518  | IL18     | T | 0.395 | 0.973 | [0.768,1.232] | 0.818 | 1.306 | [0.853,1.998] | 0.219 | 1.342 | [0.85,2.119]  | 0.206 | 0.433 |
| rs2020911  | MSH6     | T | 0.353 | 1.063 | [0.828,1.364] | 0.634 | 0.768 | [0.478,1.234] | 0.275 | 0.723 | [0.437,1.196] | 0.207 | 0.451 |
| rs299290   | HMMR     | C | 0.284 | 0.954 | [0.732,1.242] | 0.725 | 0.670 | [0.401,1.121] | 0.127 | 0.703 | [0.407,1.215] | 0.207 | 0.308 |
| rs799917   | BRCA1    | T | 0.427 | 0.916 | [0.712,1.179] | 0.497 | 1.253 | [0.797,1.97]  | 0.328 | 1.368 | [0.841,2.223] | 0.207 | 0.442 |
| rs348476   | ALDH1A1  | C | 0.017 | 1.016 | [0.419,2.466] | 0.971 | 2.281 | [0.784,6.635] | 0.130 | 2.245 | [0.639,7.88]  | 0.207 | 0.308 |
| rs3212859  | CCND1    | T | 0.058 | 1.435 | [0.861,2.391] | 0.166 | 0.704 | [0.246,2.013] | 0.513 | 0.491 | [0.162,1.485] | 0.208 | 0.269 |
| rs2274578  | BYSL     | G | 0.480 | 1.057 | [0.837,1.336] | 0.639 | 1.412 | [0.929,2.146] | 0.106 | 1.335 | [0.851,2.094] | 0.208 | 0.263 |
| rs3759259  | STYK1    | A | 0.401 | 1.102 | [0.87,1.396]  | 0.423 | 0.812 | [0.52,1.267]  | 0.359 | 0.737 | [0.458,1.185] | 0.208 | 0.425 |
| rs274558   | SLC22A5  | C | 0.420 | 1.094 | [0.847,1.413] | 0.490 | 0.798 | [0.506,1.259] | 0.332 | 0.730 | [0.446,1.193] | 0.209 | 0.444 |
| rs1051332  | ATP7B    | A | 0.409 | 0.803 | [0.626,1.029] | 0.083 | 1.091 | [0.701,1.698] | 0.700 | 1.359 | [0.842,2.192] | 0.209 | 0.183 |
| rs2598483  | STAT6    | T | 0.099 | 0.964 | [0.653,1.423] | 0.854 | 0.536 | [0.223,1.285] | 0.162 | 0.556 | [0.223,1.389] | 0.209 | 0.377 |
| rs1042714  | ADRB2    | G | 0.380 | 1.045 | [0.817,1.335] | 0.728 | 1.407 | [0.914,2.167] | 0.121 | 1.347 | [0.846,2.145] | 0.209 | 0.298 |
| rs1052248  | LST1     | A | 0.248 | 1.084 | [0.826,1.424] | 0.561 | 1.485 | [0.942,2.34]  | 0.088 | 1.370 | [0.838,2.237] | 0.209 | 0.223 |
| rs1799941  | SHBG     | A | 0.224 | 0.742 | [0.548,1.004] | 0.053 | 1.062 | [0.638,1.769] | 0.817 | 1.431 | [0.818,2.504] | 0.209 | 0.138 |
| rs1341164  | CYP2C8   | C | 0.283 | 0.804 | [0.612,1.056] | 0.116 | 1.118 | [0.695,1.797] | 0.646 | 1.391 | [0.831,2.328] | 0.210 | 0.232 |
| rs1178027  | PTPRA    | T | 0.179 | 0.931 | [0.657,1.319] | 0.688 | 0.587 | [0.299,1.152] | 0.122 | 0.631 | [0.307,1.296] | 0.210 | 0.294 |
| rs13141136 | HELQ     | G | 0.380 | 1.020 | [0.799,1.303] | 0.872 | 1.386 | [0.886,2.166] | 0.152 | 1.358 | [0.841,2.192] | 0.210 | 0.359 |
| rs163081   | FAM82A   | T | 0.224 | 0.850 | [0.624,1.158] | 0.302 | 1.217 | [0.728,2.033] | 0.454 | 1.432 | [0.817,2.51]  | 0.210 | 0.392 |
| rs1378321  | HNMT     | C | 0.201 | 0.658 | [0.483,0.895] | 0.008 | 0.938 | [0.568,1.549] | 0.803 | 1.426 | [0.818,2.484] | 0.211 | 0.029 |
| rs6902123  | PPARD    | C | 0.166 | 0.815 | [0.552,1.204] | 0.305 | 1.285 | [0.668,2.474] | 0.453 | 1.576 | [0.773,3.216] | 0.211 | 0.392 |
| rs2076169  | PPARD    | C | 0.085 | 0.833 | [0.535,1.296] | 0.418 | 1.360 | [0.68,2.722]  | 0.384 | 1.633 | [0.757,3.522] | 0.211 | 0.440 |

|            |              |   |       |       |               |       |       |               |       |       |               |       |       |
|------------|--------------|---|-------|-------|---------------|-------|-------|---------------|-------|-------|---------------|-------|-------|
| rs2778979  | PLXDC2       | T | 0.119 | 0.841 | [0.579,1.221] | 0.363 | 1.293 | [0.699,2.39]  | 0.412 | 1.537 | [0.784,3.015] | 0.211 | 0.420 |
| rs373572   | RAD18        | G | 0.300 | 1.426 | [1.106,1.839] | 0.006 | 1.039 | [0.652,1.655] | 0.873 | 0.728 | [0.443,1.198] | 0.212 | 0.023 |
| rs4951629  | ATF3         | C | 0.086 | 1.235 | [0.819,1.863] | 0.315 | 0.695 | [0.295,1.641] | 0.407 | 0.563 | [0.229,1.387] | 0.212 | 0.376 |
| rs40947    | THAP5        | A | 0.296 | 1.086 | [0.843,1.4]   | 0.523 | 0.783 | [0.482,1.271] | 0.322 | 0.721 | [0.43,1.207]  | 0.213 | 0.451 |
| rs1677715  | PDSS1        | A | 0.340 | 1.337 | [1.043,1.714] | 0.022 | 0.985 | [0.628,1.544] | 0.947 | 0.737 | [0.455,1.192] | 0.213 | 0.066 |
| rs757343   | VDR          | A | 0.133 | 0.908 | [0.641,1.286] | 0.587 | 1.341 | [0.763,2.357] | 0.307 | 1.477 | [0.798,2.735] | 0.214 | 0.462 |
| rs1799998  | CYP11B2      | C | 0.397 | 1.194 | [0.937,1.523] | 0.152 | 0.880 | [0.561,1.38]  | 0.579 | 0.737 | [0.455,1.193] | 0.214 | 0.269 |
| rs1800206  | PPARA        | G | 0.052 | 1.011 | [0.603,1.697] | 0.967 | 0.395 | [0.093,1.67]  | 0.207 | 0.390 | [0.088,1.728] | 0.215 | 0.445 |
| rs2291439  | RAD54B       | G | 0.370 | 0.994 | [0.779,1.269] | 0.963 | 0.730 | [0.462,1.153] | 0.178 | 0.735 | [0.451,1.197] | 0.215 | 0.399 |
| rs1946519  | IL18         | A | 0.398 | 0.964 | [0.761,1.221] | 0.760 | 1.286 | [0.84,1.969]  | 0.247 | 1.334 | [0.845,2.108] | 0.216 | 0.457 |
| rs4577050  | SLC12A6      | G | 0.392 | 1.182 | [0.924,1.513] | 0.183 | 0.865 | [0.544,1.375] | 0.540 | 0.732 | [0.446,1.201] | 0.216 | 0.300 |
| rs2267237  | LARGE        | C | 0.134 | 1.305 | [0.929,1.835] | 0.125 | 0.833 | [0.425,1.632] | 0.594 | 0.638 | [0.313,1.301] | 0.216 | 0.234 |
| rs2239704  | LTA          | T | 0.359 | 0.808 | [0.63,1.036]  | 0.093 | 1.090 | [0.702,1.693] | 0.701 | 1.349 | [0.839,2.17]  | 0.217 | 0.202 |
| rs1555026  | ID3          | C | 0.079 | 1.433 | [0.931,2.203] | 0.102 | 0.807 | [0.34,1.918]  | 0.628 | 0.564 | [0.227,1.401] | 0.217 | 0.202 |
| rs743572   | CYP17A1      | G | 0.410 | 1.077 | [0.855,1.358] | 0.529 | 0.804 | [0.521,1.243] | 0.326 | 0.747 | [0.469,1.187] | 0.217 | 0.459 |
| rs3772173  | SKIL         | C | 0.258 | 1.046 | [0.798,1.369] | 0.746 | 1.426 | [0.906,2.244] | 0.126 | 1.363 | [0.833,2.232] | 0.218 | 0.308 |
| rs1760944  | APEX1        | A | 0.391 | 0.976 | [0.774,1.23]  | 0.836 | 1.286 | [0.855,1.935] | 0.227 | 1.318 | [0.849,2.046] | 0.219 | 0.448 |
| rs1558093  | SMAD5        | C | 0.329 | 0.818 | [0.63,1.062]  | 0.131 | 1.108 | [0.709,1.732] | 0.652 | 1.355 | [0.834,2.201] | 0.219 | 0.256 |
| rs2069705  | IFNG         | C | 0.373 | 1.106 | [0.875,1.396] | 0.399 | 1.457 | [0.967,2.194] | 0.072 | 1.317 | [0.848,2.047] | 0.220 | 0.167 |
| rs10017306 | SLC39A8      | T | 0.395 | 0.970 | [0.761,1.238] | 0.809 | 0.714 | [0.451,1.13]  | 0.151 | 0.736 | [0.45,1.202]  | 0.221 | 0.356 |
| rs1050891  | HNMT         | C | 0.194 | 0.661 | [0.484,0.903] | 0.009 | 0.943 | [0.563,1.581] | 0.824 | 1.427 | [0.807,2.522] | 0.221 | 0.034 |
| rs2470146  | CYP19A1      | C | 0.057 | 1.455 | [0.917,2.308] | 0.111 | 0.683 | [0.211,2.212] | 0.525 | 0.469 | [0.14,1.578]  | 0.221 | 0.200 |
| rs1008563  | IL8RA        | T | 0.430 | 0.936 | [0.74,1.183]  | 0.579 | 0.699 | [0.451,1.083] | 0.109 | 0.747 | [0.467,1.193] | 0.222 | 0.260 |
| rs1805087  | MTR          | G | 0.202 | 0.902 | [0.67,1.214]  | 0.495 | 1.265 | [0.768,2.085] | 0.356 | 1.403 | [0.814,2.419] | 0.222 | 0.466 |
| rs1390358  | NAT2         | C | 0.366 | 1.126 | [0.891,1.423] | 0.320 | 0.840 | [0.54,1.307]  | 0.440 | 0.746 | [0.466,1.194] | 0.222 | 0.400 |
| rs20580    | LIG1         | C | 0.495 | 1.187 | [0.947,1.488] | 0.137 | 0.906 | [0.604,1.358] | 0.631 | 0.763 | [0.494,1.179] | 0.223 | 0.260 |
| rs312016   | LRP5         | A | 0.280 | 1.076 | [0.832,1.392] | 0.577 | 1.451 | [0.928,2.267] | 0.103 | 1.348 | [0.834,2.18]  | 0.223 | 0.251 |
| rs1050900  | HNMT         | A | 0.194 | 0.660 | [0.483,0.901] | 0.009 | 0.939 | [0.561,1.571] | 0.811 | 1.423 | [0.806,2.511] | 0.223 | 0.033 |
| rs6661174  | FMO2         | C | 0.027 | 1.232 | [0.533,2.847] | 0.625 | 0.321 | [0.041,2.529] | 0.281 | 0.261 | [0.03,2.274]  | 0.224 | 0.474 |
| rs662799   | APOA5        | G | 0.084 | 1.765 | [1.189,2.62]  | 0.005 | 2.613 | [1.437,4.752] | 0.002 | 1.481 | [0.786,2.789] | 0.224 | 0.001 |
| rs2463437  | CHST11       | C | 0.342 | 1.443 | [1.129,1.844] | 0.003 | 1.074 | [0.686,1.681] | 0.756 | 0.744 | [0.461,1.2]   | 0.225 | 0.013 |
| rs4987876  | ATM          | T | 0.094 | 0.948 | [0.627,1.434] | 0.800 | 0.515 | [0.202,1.317] | 0.166 | 0.544 | [0.203,1.457] | 0.225 | 0.381 |
| rs3770602  | ABCB11       | A | 0.270 | 0.752 | [0.571,0.99]  | 0.042 | 1.037 | [0.642,1.675] | 0.882 | 1.379 | [0.82,2.32]   | 0.226 | 0.116 |
| rs698708   | KDSR         | G | 0.292 | 0.942 | [0.722,1.23]  | 0.663 | 1.280 | [0.81,2.023]  | 0.290 | 1.359 | [0.827,2.231] | 0.226 | 0.479 |
| rs373496   | TNFRSF17     | T | 0.026 | 0.860 | [0.406,1.82]  | 0.693 | 0.233 | [0.03,1.8]    | 0.163 | 0.271 | [0.033,2.244] | 0.226 | 0.364 |
| rs820196   | LOC100132011 | C | 0.226 | 0.816 | [0.599,1.112] | 0.198 | 1.144 | [0.696,1.879] | 0.597 | 1.401 | [0.811,2.419] | 0.226 | 0.337 |
| rs323870   | PARP3        | G | 0.027 | 1.097 | [0.485,2.48]  | 0.825 | 2.351 | [0.809,6.83]  | 0.116 | 2.143 | [0.622,7.384] | 0.227 | 0.291 |
| rs1019731  | IGF1         | T | 0.111 | 1.066 | [0.747,1.522] | 0.725 | 1.585 | [0.874,2.874] | 0.130 | 1.487 | [0.781,2.83]  | 0.227 | 0.315 |
| rs2276299  | SLC22A8      | T | 0.171 | 0.972 | [0.705,1.341] | 0.863 | 1.388 | [0.814,2.366] | 0.228 | 1.428 | [0.8,2.548]   | 0.228 | 0.454 |
| rs6163     | CYP17A1      | A | 0.410 | 1.065 | [0.845,1.343] | 0.593 | 0.801 | [0.519,1.237] | 0.317 | 0.752 | [0.473,1.196] | 0.228 | 0.482 |
| rs363717   | ABCA1        | G | 0.162 | 1.254 | [0.931,1.688] | 0.136 | 0.849 | [0.464,1.555] | 0.596 | 0.677 | [0.359,1.277] | 0.228 | 0.248 |

|            |          |   |       |       |               |       |       |               |       |       |               |       |       |
|------------|----------|---|-------|-------|---------------|-------|-------|---------------|-------|-------|---------------|-------|-------|
| rs8187799  | ABCB4    | G | 0.123 | 1.223 | [0.851,1.759] | 0.277 | 0.780 | [0.392,1.55]  | 0.478 | 0.638 | [0.306,1.327] | 0.229 | 0.382 |
| rs20551    | EP300    | G | 0.246 | 0.953 | [0.724,1.255] | 0.734 | 0.668 | [0.387,1.154] | 0.148 | 0.701 | [0.392,1.252] | 0.229 | 0.347 |
| rs3813627  | APOA2    | T | 0.312 | 0.821 | [0.634,1.064] | 0.136 | 1.114 | [0.703,1.766] | 0.645 | 1.357 | [0.825,2.233] | 0.230 | 0.264 |
| rs2046136  | BCL2     | C | 0.276 | 1.006 | [0.776,1.305] | 0.963 | 0.720 | [0.43,1.204]  | 0.211 | 0.715 | [0.414,1.236] | 0.230 | 0.447 |
| rs5939     | PTAFR    | G | 0.014 | 1.795 | [0.687,4.691] | 0.233 | 0.494 | [0.065,3.756] | 0.496 | 0.275 | [0.034,2.26]  | 0.230 | 0.334 |
| rs10515114 | CARTPT   | C | 0.119 | 1.260 | [0.889,1.787] | 0.194 | 0.809 | [0.406,1.612] | 0.547 | 0.642 | [0.311,1.324] | 0.230 | 0.310 |
| rs186997   | ALDH1A1  | G | 0.069 | 0.975 | [0.593,1.604] | 0.921 | 1.612 | [0.77,3.376]  | 0.205 | 1.653 | [0.727,3.761] | 0.230 | 0.428 |
| rs2332673  | BCL2     | C | 0.069 | 0.793 | [0.469,1.339] | 0.385 | 1.320 | [0.633,2.752] | 0.458 | 1.666 | [0.723,3.837] | 0.231 | 0.464 |
| rs348481   | ALDH1A1  | C | 0.235 | 1.102 | [0.832,1.458] | 0.499 | 1.507 | [0.938,2.421] | 0.090 | 1.368 | [0.819,2.285] | 0.232 | 0.218 |
| rs2404955  | CYP3A4   | A | 0.218 | 1.242 | [0.903,1.708] | 0.184 | 0.853 | [0.48,1.513]  | 0.586 | 0.687 | [0.371,1.272] | 0.232 | 0.315 |
| rs6756629  | ABCG5    | A | 0.062 | 1.485 | [0.962,2.293] | 0.074 | 0.815 | [0.316,2.102] | 0.672 | 0.549 | [0.205,1.471] | 0.233 | 0.161 |
| rs6673324  | LEPR     | G | 0.484 | 0.951 | [0.749,1.207] | 0.678 | 1.265 | [0.816,1.96]  | 0.293 | 1.330 | [0.832,2.127] | 0.233 | 0.490 |
| rs1042718  | ADRB2    | A | 0.200 | 0.973 | [0.723,1.308] | 0.854 | 1.348 | [0.823,2.208] | 0.235 | 1.386 | [0.81,2.373]  | 0.233 | 0.463 |
| rs2229532  | ACP5     | A | 0.021 | 1.229 | [0.5,3.025]   | 0.653 | 0.328 | [0.041,2.639] | 0.295 | 0.267 | [0.03,2.353]  | 0.234 | 0.491 |
| rs1076153  | DBH      | T | 0.202 | 1.094 | [0.822,1.455] | 0.538 | 1.496 | [0.927,2.415] | 0.099 | 1.368 | [0.816,2.292] | 0.234 | 0.241 |
| rs1799722  | BDKRB2   | T | 0.407 | 0.891 | [0.69,1.149]  | 0.374 | 1.197 | [0.763,1.877] | 0.434 | 1.344 | [0.826,2.186] | 0.234 | 0.445 |
| rs735320   | CYP8B1   | A | 0.160 | 1.031 | [0.759,1.399] | 0.846 | 1.435 | [0.869,2.369] | 0.158 | 1.392 | [0.807,2.401] | 0.234 | 0.369 |
| rs1861494  | IFNG     | C | 0.271 | 0.976 | [0.753,1.263] | 0.851 | 1.303 | [0.837,2.03]  | 0.241 | 1.336 | [0.828,2.156] | 0.235 | 0.470 |
| rs2306283  | SLCO1B1  | C | 0.465 | 1.075 | [0.847,1.364] | 0.551 | 0.803 | [0.51,1.263]  | 0.342 | 0.747 | [0.461,1.21]  | 0.235 | 0.487 |
| rs673548   | APOB     | A | 0.236 | 0.965 | [0.725,1.285] | 0.809 | 0.675 | [0.387,1.176] | 0.165 | 0.699 | [0.387,1.263] | 0.235 | 0.381 |
| rs1051137  | GSTM4    | T | 0.320 | 0.812 | [0.621,1.062] | 0.129 | 1.102 | [0.693,1.754] | 0.682 | 1.357 | [0.819,2.248] | 0.236 | 0.261 |
| rs1540339  | VDR      | A | 0.348 | 1.264 | [1,1.598]     | 0.050 | 0.952 | [0.613,1.478] | 0.825 | 0.753 | [0.471,1.204] | 0.236 | 0.130 |
| rs5277     | PTGS2    | C | 0.123 | 0.981 | [0.696,1.384] | 0.914 | 1.423 | [0.809,2.502] | 0.221 | 1.450 | [0.784,2.68]  | 0.236 | 0.452 |
| rs10276036 | ABCB1    | C | 0.403 | 0.967 | [0.76,1.231]  | 0.786 | 0.722 | [0.459,1.137] | 0.160 | 0.747 | [0.46,1.212]  | 0.237 | 0.371 |
| rs6971     | TSPO     | T | 0.274 | 0.903 | [0.689,1.183] | 0.457 | 1.223 | [0.769,1.947] | 0.395 | 1.355 | [0.819,2.243] | 0.237 | 0.477 |
| rs1023244  | DPYD     | G | 0.061 | 1.291 | [0.81,2.058]  | 0.283 | 2.083 | [0.998,4.346] | 0.051 | 1.613 | [0.73,3.563]  | 0.237 | 0.115 |
| rs135549   | PPARA    | G | 0.433 | 0.973 | [0.768,1.233] | 0.822 | 0.732 | [0.47,1.139]  | 0.166 | 0.752 | [0.469,1.206] | 0.237 | 0.383 |
| rs2857009  | TNXB     | G | 0.275 | 1.075 | [0.826,1.4]   | 0.592 | 1.455 | [0.911,2.326] | 0.117 | 1.354 | [0.819,2.238] | 0.237 | 0.279 |
| rs2278815  | LEP      | A | 0.473 | 1.081 | [0.847,1.381] | 0.531 | 0.805 | [0.509,1.274] | 0.355 | 0.745 | [0.457,1.215] | 0.238 | 0.488 |
| rs2412504  | PAK6     | G | 0.111 | 1.129 | [0.761,1.673] | 0.547 | 0.683 | [0.311,1.497] | 0.341 | 0.605 | [0.263,1.394] | 0.238 | 0.489 |
| rs715147   | NFATC2   | A | 0.456 | 0.823 | [0.649,1.044] | 0.108 | 1.082 | [0.71,1.65]   | 0.713 | 1.315 | [0.834,2.072] | 0.238 | 0.230 |
| rs1799929  | NAT2     | T | 0.383 | 1.096 | [0.866,1.388] | 0.446 | 0.823 | [0.527,1.287] | 0.394 | 0.751 | [0.467,1.209] | 0.238 | 0.469 |
| rs246234   | ABCC1    | C | 0.349 | 1.116 | [0.861,1.447] | 0.406 | 1.496 | [0.951,2.354] | 0.082 | 1.340 | [0.823,2.181] | 0.239 | 0.186 |
| rs4724445  | IGFBP1   | A | 0.160 | 0.962 | [0.705,1.314] | 0.809 | 0.635 | [0.329,1.227] | 0.177 | 0.660 | [0.33,1.321]  | 0.241 | 0.401 |
| rs4220     | FGB      | A | 0.159 | 1.258 | [0.923,1.712] | 0.146 | 0.855 | [0.463,1.577] | 0.615 | 0.680 | [0.356,1.296] | 0.241 | 0.269 |
| rs2227956  | HSPA1L   | C | 0.137 | 0.684 | [0.471,0.994] | 0.046 | 1.032 | [0.553,1.927] | 0.921 | 1.509 | [0.758,3.002] | 0.241 | 0.130 |
| rs6731242  | UGT1A10  | G | 0.182 | 1.004 | [0.739,1.364] | 0.979 | 0.675 | [0.36,1.265]  | 0.220 | 0.672 | [0.346,1.307] | 0.242 | 0.464 |
| rs1052763  | DGCR14   | T | 0.223 | 0.958 | [0.723,1.271] | 0.767 | 0.678 | [0.394,1.166] | 0.160 | 0.707 | [0.396,1.263] | 0.242 | 0.370 |
| rs1044250  | ANGPTL4  | T | 0.292 | 0.807 | [0.618,1.055] | 0.117 | 1.086 | [0.688,1.712] | 0.724 | 1.344 | [0.819,2.207] | 0.242 | 0.248 |
| rs1057335  | SERPINF2 | A | 0.203 | 0.962 | [0.715,1.296] | 0.801 | 0.669 | [0.377,1.186] | 0.169 | 0.695 | [0.378,1.279] | 0.242 | 0.387 |
| rs1913263  | MGST1    | G | 0.302 | 1.053 | [0.821,1.351] | 0.684 | 0.778 | [0.483,1.253] | 0.302 | 0.739 | [0.445,1.227] | 0.242 | 0.505 |

|            |          |   |       |       |               |       |       |               |       |       |               |       |       |
|------------|----------|---|-------|-------|---------------|-------|-------|---------------|-------|-------|---------------|-------|-------|
| rs3738880  | GLI2     | C | 0.334 | 0.928 | [0.7,1.229]   | 0.600 | 1.257 | [0.79,1.999]  | 0.335 | 1.355 | [0.814,2.254] | 0.243 | 0.505 |
| rs10824792 | MBL2     | C | 0.475 | 1.018 | [0.805,1.289] | 0.879 | 0.770 | [0.497,1.194] | 0.243 | 0.756 | [0.473,1.21]  | 0.244 | 0.482 |
| rs3813865  | CYP2E1   | C | 0.050 | 1.213 | [0.702,2.098] | 0.489 | 2.081 | [0.917,4.719] | 0.079 | 1.715 | [0.693,4.247] | 0.244 | 0.198 |
| rs2243270  | IL4      | G | 0.275 | 1.353 | [1.036,1.766] | 0.026 | 0.974 | [0.578,1.642] | 0.921 | 0.720 | [0.414,1.251] | 0.244 | 0.078 |
| rs1455158  | HNMT     | A | 0.256 | 0.716 | [0.536,0.957] | 0.024 | 0.984 | [0.605,1.602] | 0.949 | 1.374 | [0.805,2.344] | 0.244 | 0.076 |
| rs8187710  | ABCC2    | A | 0.075 | 0.738 | [0.444,1.225] | 0.240 | 1.204 | [0.587,2.467] | 0.612 | 1.631 | [0.715,3.72]  | 0.245 | 0.403 |
| rs6945984  | CYP3A4   | C | 0.217 | 1.237 | [0.903,1.696] | 0.186 | 0.862 | [0.488,1.52]  | 0.607 | 0.696 | [0.378,1.281] | 0.245 | 0.325 |
| rs182482   | ABCC1    | G | 0.320 | 1.145 | [0.882,1.486] | 0.310 | 0.839 | [0.514,1.371] | 0.484 | 0.733 | [0.434,1.237] | 0.245 | 0.418 |
| rs6056     | FGF      | T | 0.160 | 1.247 | [0.916,1.698] | 0.161 | 0.850 | [0.461,1.569] | 0.603 | 0.682 | [0.357,1.301] | 0.245 | 0.289 |
| rs11226    | RAD52    | T | 0.463 | 1.016 | [0.799,1.293] | 0.898 | 1.340 | [0.867,2.07]  | 0.188 | 1.319 | [0.826,2.104] | 0.246 | 0.420 |
| rs431240   | SLC36A2  | G | 0.431 | 0.961 | [0.759,1.218] | 0.744 | 0.734 | [0.481,1.12]  | 0.152 | 0.763 | [0.484,1.205] | 0.246 | 0.355 |
| rs2239393  | COMT     | G | 0.374 | 0.915 | [0.719,1.165] | 0.472 | 1.203 | [0.782,1.852] | 0.400 | 1.315 | [0.827,2.089] | 0.247 | 0.490 |
| rs1126579  | IL8RB    | T | 0.414 | 0.948 | [0.746,1.205] | 0.663 | 1.263 | [0.8,1.994]   | 0.317 | 1.332 | [0.82,2.164]  | 0.247 | 0.512 |
| rs930507   | MBL2     | G | 0.203 | 1.048 | [0.777,1.413] | 0.759 | 1.432 | [0.882,2.324] | 0.146 | 1.366 | [0.805,2.319] | 0.247 | 0.347 |
| rs6759892  | UGT1A10  | G | 0.394 | 0.961 | [0.755,1.223] | 0.745 | 1.265 | [0.819,1.952] | 0.289 | 1.316 | [0.826,2.098] | 0.248 | 0.509 |
| rs1056503  | XRCC4    | G | 0.210 | 0.953 | [0.717,1.268] | 0.743 | 0.668 | [0.378,1.181] | 0.165 | 0.701 | [0.383,1.283] | 0.249 | 0.377 |
| rs1805377  | XRCC4    | A | 0.210 | 0.953 | [0.717,1.268] | 0.743 | 0.668 | [0.378,1.181] | 0.165 | 0.701 | [0.383,1.283] | 0.249 | 0.377 |
| rs747659   | PARP1    | T | 0.214 | 0.988 | [0.736,1.326] | 0.937 | 0.692 | [0.393,1.22]  | 0.203 | 0.700 | [0.382,1.284] | 0.249 | 0.444 |
| rs212090   | ABCC1    | A | 0.401 | 0.950 | [0.739,1.22]  | 0.686 | 1.263 | [0.804,1.982] | 0.311 | 1.329 | [0.819,2.159] | 0.250 | 0.515 |
| rs3793345  | IGFBP3   | C | 0.189 | 0.995 | [0.736,1.345] | 0.975 | 0.691 | [0.385,1.239] | 0.215 | 0.694 | [0.373,1.292] | 0.250 | 0.459 |
| rs6671288  | NR1I3    | G | 0.164 | 0.756 | [0.536,1.066] | 0.110 | 1.079 | [0.625,1.862] | 0.785 | 1.428 | [0.779,2.619] | 0.250 | 0.248 |
| rs923796   | NAT2     | G | 0.364 | 1.122 | [0.886,1.421] | 0.341 | 0.850 | [0.546,1.324] | 0.473 | 0.758 | [0.473,1.216] | 0.250 | 0.440 |
| rs3100725  | HNMT     | T | 0.213 | 0.686 | [0.508,0.926] | 0.014 | 0.946 | [0.574,1.559] | 0.828 | 1.380 | [0.796,2.392] | 0.251 | 0.048 |
| rs7136446  | IGF1     | C | 0.357 | 1.083 | [0.852,1.376] | 0.515 | 0.819 | [0.524,1.28]  | 0.381 | 0.757 | [0.47,1.218]  | 0.251 | 0.503 |
| rs2270165  | STARD3NL | A | 0.150 | 0.832 | [0.59,1.174]  | 0.294 | 1.201 | [0.677,2.13]  | 0.532 | 1.444 | [0.771,2.704] | 0.252 | 0.428 |
| rs5743553  | TLR1     | A | 0.033 | 1.155 | [0.596,2.241] | 0.670 | 0.463 | [0.104,2.053] | 0.311 | 0.401 | [0.084,1.914] | 0.252 | 0.517 |
| rs839763   | CDC20    | G | 0.359 | 0.820 | [0.642,1.047] | 0.111 | 1.075 | [0.701,1.65]  | 0.741 | 1.311 | [0.825,2.085] | 0.252 | 0.242 |
| rs2230399  | ICAM3    | C | 0.103 | 1.049 | [0.714,1.542] | 0.807 | 0.634 | [0.28,1.437]  | 0.275 | 0.604 | [0.255,1.432] | 0.252 | 0.513 |
| rs1051685  | XRCC5    | G | 0.155 | 1.197 | [0.859,1.67]  | 0.288 | 0.802 | [0.422,1.526] | 0.502 | 0.670 | [0.338,1.33]  | 0.253 | 0.409 |
| rs6773295  | NR1I2    | G | 0.037 | 0.900 | [0.385,2.106] | 0.809 | 0.254 | [0.032,2.008] | 0.194 | 0.282 | [0.032,2.469] | 0.253 | 0.426 |
| rs1913262  | MGST1    | A | 0.302 | 1.047 | [0.817,1.343] | 0.715 | 0.779 | [0.483,1.255] | 0.304 | 0.744 | [0.448,1.236] | 0.253 | 0.519 |
| rs17129772 | IL12RB2  | G | 0.014 | 1.528 | [0.53,4.4]    | 0.432 | 0.406 | [0.047,3.487] | 0.411 | 0.266 | [0.027,2.586] | 0.254 | 0.478 |
| rs10017302 | UGT8     | G | 0.046 | 1.158 | [0.631,2.126] | 0.636 | 0.538 | [0.155,1.867] | 0.328 | 0.464 | [0.124,1.735] | 0.254 | 0.520 |
| rs348479   | ALDH1A1  | G | 0.232 | 1.063 | [0.804,1.404] | 0.668 | 1.428 | [0.893,2.283] | 0.137 | 1.343 | [0.809,2.231] | 0.254 | 0.325 |
| rs3778082  | ESR1     | A | 0.173 | 1.024 | [0.737,1.423] | 0.886 | 0.696 | [0.374,1.295] | 0.253 | 0.679 | [0.349,1.321] | 0.255 | 0.498 |
| rs2239184  | VDR      | C | 0.447 | 1.147 | [0.904,1.456] | 0.260 | 0.874 | [0.564,1.354] | 0.546 | 0.762 | [0.477,1.217] | 0.255 | 0.394 |
| rs35620    | ABCC1    | G | 0.163 | 1.452 | [1.071,1.97]  | 0.016 | 1.000 | [0.544,1.839] | 0.999 | 0.689 | [0.363,1.309] | 0.255 | 0.053 |
| rs228832   | NFATC2   | T | 0.322 | 1.072 | [0.832,1.38]  | 0.592 | 0.798 | [0.497,1.283] | 0.352 | 0.745 | [0.448,1.237] | 0.255 | 0.520 |
| rs2687127  | CYP3A7   | C | 0.015 | 1.186 | [0.441,3.187] | 0.736 | 2.579 | [0.842,7.898] | 0.097 | 2.176 | [0.569,8.316] | 0.256 | 0.252 |
| rs7304504  | LRP1     | A | 0.053 | 1.222 | [0.694,2.152] | 0.487 | 0.619 | [0.206,1.856] | 0.392 | 0.506 | [0.156,1.642] | 0.257 | 0.504 |
| rs2687116  | CYP3A4   | G | 0.139 | 1.384 | [0.906,2.113] | 0.133 | 0.891 | [0.446,1.78]  | 0.745 | 0.644 | [0.301,1.378] | 0.257 | 0.280 |

|            |          |   |       |       |               |       |       |               |       |       |                |       |       |
|------------|----------|---|-------|-------|---------------|-------|-------|---------------|-------|-------|----------------|-------|-------|
| rs8192341  | BMP1     | A | 0.221 | 0.941 | [0.712,1.245] | 0.671 | 0.659 | [0.368,1.182] | 0.162 | 0.700 | [0.378,1.297]  | 0.257 | 0.364 |
| rs2020863  | FMO2     | G | 0.096 | 1.170 | [0.806,1.697] | 0.409 | 0.704 | [0.302,1.64]  | 0.417 | 0.602 | [0.25,1.449]   | 0.258 | 0.462 |
| UGT2B7_1c  | UGT2B7   | G | 0.129 | 1.358 | [0.971,1.899] | 0.074 | 0.905 | [0.464,1.764] | 0.769 | 0.666 | [0.33,1.347]   | 0.258 | 0.174 |
| rs11401    | CCDC101  | C | 0.180 | 0.811 | [0.592,1.112] | 0.194 | 0.536 | [0.271,1.06]  | 0.073 | 0.660 | [0.321,1.356]  | 0.258 | 0.108 |
| rs1530031  | CHST10   | A | 0.495 | 0.795 | [0.633,0.998] | 0.048 | 1.023 | [0.681,1.536] | 0.913 | 1.286 | [0.831,1.99]   | 0.258 | 0.132 |
| rs742350   | FMO1     | A | 0.183 | 0.957 | [0.688,1.331] | 0.793 | 1.334 | [0.788,2.257] | 0.283 | 1.394 | [0.783,2.482]  | 0.259 | 0.513 |
| rs919766   | IL12B    | C | 0.119 | 1.136 | [0.803,1.608] | 0.471 | 0.746 | [0.372,1.495] | 0.408 | 0.656 | [0.316,1.364]  | 0.259 | 0.496 |
| rs1140409  | DDX5     | G | 0.055 | 0.725 | [0.423,1.242] | 0.242 | 0.305 | [0.071,1.299] | 0.108 | 0.421 | [0.093,1.895]  | 0.259 | 0.160 |
| rs12373018 | TRAP1    | C | 0.147 | 1.171 | [0.849,1.614] | 0.336 | 1.631 | [0.952,2.795] | 0.075 | 1.394 | [0.782,2.483]  | 0.260 | 0.164 |
| rs1448905  | ADAM23   | C | 0.404 | 0.896 | [0.705,1.138] | 0.367 | 1.163 | [0.762,1.773] | 0.484 | 1.298 | [0.824,2.045]  | 0.261 | 0.469 |
| rs6577     | GSTA2    | C | 0.155 | 1.164 | [0.797,1.701] | 0.432 | 0.766 | [0.39,1.506]  | 0.440 | 0.658 | [0.317,1.366]  | 0.261 | 0.497 |
| rs4292454  | GHR      | C | 0.442 | 1.081 | [0.852,1.371] | 0.523 | 0.825 | [0.531,1.282] | 0.392 | 0.763 | [0.476,1.224]  | 0.262 | 0.520 |
| rs2230748  | CD97     | A | 0.142 | 0.963 | [0.688,1.348] | 0.828 | 1.359 | [0.782,2.361] | 0.277 | 1.410 | [0.773,2.575]  | 0.263 | 0.514 |
| rs1330286  | ALDH1A1  | G | 0.376 | 1.004 | [0.785,1.283] | 0.975 | 1.309 | [0.851,2.014] | 0.221 | 1.304 | [0.819,2.076]  | 0.264 | 0.468 |
| rs1041983  | NAT2     | T | 0.354 | 0.937 | [0.731,1.203] | 0.611 | 0.704 | [0.44,1.127]  | 0.144 | 0.751 | [0.455,1.241]  | 0.264 | 0.327 |
| rs603965   | CCND1    | A | 0.442 | 1.089 | [0.862,1.375] | 0.477 | 0.835 | [0.539,1.291] | 0.417 | 0.767 | [0.481,1.222]  | 0.264 | 0.510 |
| rs4986826  | AHR      | A | 0.011 | 0.296 | [0.038,2.329] | 0.247 | 1.288 | [0.221,7.49]  | 0.778 | 4.358 | [0.329,57.724] | 0.264 | 0.474 |
| rs3798343  | PPARD    | G | 0.056 | 1.215 | [0.737,2.004] | 0.445 | 0.637 | [0.215,1.882] | 0.414 | 0.524 | [0.168,1.635]  | 0.265 | 0.491 |
| rs25648    | VEGFA    | T | 0.148 | 1.081 | [0.78,1.5]    | 0.640 | 1.515 | [0.872,2.631] | 0.141 | 1.401 | [0.774,2.537]  | 0.266 | 0.329 |
| rs3131637  | TNF      | T | 0.354 | 0.779 | [0.604,1.003] | 0.053 | 1.025 | [0.654,1.605] | 0.915 | 1.316 | [0.811,2.136]  | 0.267 | 0.144 |
| rs6103     | SERPINB2 | G | 0.257 | 1.380 | [1.06,1.797]  | 0.017 | 1.820 | [1.149,2.881] | 0.011 | 1.319 | [0.808,2.153]  | 0.269 | 0.005 |
| rs930509   | MBL2     | C | 0.171 | 0.958 | [0.697,1.315] | 0.789 | 1.320 | [0.785,2.222] | 0.295 | 1.379 | [0.78,2.436]   | 0.269 | 0.529 |
| rs2899472  | CYP19A1  | A | 0.206 | 0.823 | [0.608,1.113] | 0.205 | 1.132 | [0.672,1.907] | 0.642 | 1.376 | [0.781,2.423]  | 0.269 | 0.364 |
| rs858521   | SAT2     | G | 0.322 | 1.020 | [0.794,1.311] | 0.874 | 1.338 | [0.854,2.094] | 0.203 | 1.311 | [0.811,2.119]  | 0.269 | 0.445 |
| rs1002153  | PARP1    | C | 0.218 | 0.915 | [0.689,1.214] | 0.537 | 0.654 | [0.375,1.142] | 0.136 | 0.715 | [0.395,1.296]  | 0.270 | 0.297 |
| rs10018287 | MGC48628 | T | 0.338 | 0.854 | [0.663,1.101] | 0.223 | 1.117 | [0.721,1.732] | 0.621 | 1.308 | [0.812,2.106]  | 0.270 | 0.382 |
| rs3793771  | WNT8B    | G | 0.216 | 0.962 | [0.72,1.285]  | 0.793 | 1.301 | [0.793,2.136] | 0.298 | 1.353 | [0.79,2.316]   | 0.271 | 0.534 |
| rs3138052  | NFKBIA   | G | 0.275 | 0.840 | [0.638,1.107] | 0.217 | 1.117 | [0.702,1.777] | 0.640 | 1.329 | [0.801,2.207]  | 0.271 | 0.380 |
| rs16944    | IL1B     | A | 0.385 | 1.112 | [0.876,1.412] | 0.381 | 0.852 | [0.546,1.329] | 0.479 | 0.766 | [0.476,1.232]  | 0.271 | 0.482 |
| rs3824874  | MTMR2    | G | 0.325 | 0.964 | [0.732,1.268] | 0.792 | 1.277 | [0.806,2.022] | 0.298 | 1.325 | [0.803,2.186]  | 0.271 | 0.534 |
| rs348485   | ALDH1A1  | C | 0.212 | 1.086 | [0.817,1.443] | 0.572 | 1.450 | [0.899,2.339] | 0.128 | 1.336 | [0.797,2.239]  | 0.272 | 0.297 |
| rs9282682  | FANCA    | C | 0.101 | 1.000 | [0.68,1.47]   | 0.999 | 0.621 | [0.278,1.388] | 0.246 | 0.621 | [0.266,1.453]  | 0.272 | 0.505 |
| rs8190955  | GSR      | T | 0.017 | 1.474 | [0.587,3.699] | 0.409 | 0.413 | [0.046,3.69]  | 0.429 | 0.281 | [0.029,2.72]   | 0.273 | 0.476 |
| rs12233949 | GHR      | C | 0.251 | 0.860 | [0.651,1.136] | 0.287 | 1.157 | [0.707,1.891] | 0.562 | 1.345 | [0.791,2.288]  | 0.273 | 0.434 |
| rs17110944 | PDGFRB   | A | 0.041 | 1.375 | [0.712,2.655] | 0.343 | 0.654 | [0.189,2.259] | 0.502 | 0.475 | [0.125,1.802]  | 0.274 | 0.467 |
| rs2302538  | UGT1A1   | G | 0.161 | 1.271 | [0.919,1.756] | 0.147 | 0.895 | [0.498,1.608] | 0.710 | 0.704 | [0.376,1.32]   | 0.274 | 0.295 |
| rs1545981  | IL17RD   | T | 0.127 | 0.980 | [0.689,1.394] | 0.910 | 1.387 | [0.785,2.451] | 0.260 | 1.416 | [0.759,2.64]   | 0.274 | 0.509 |
| rs1413228  | DPYD     | G | 0.126 | 1.340 | [0.937,1.916] | 0.109 | 1.889 | [1.067,3.346] | 0.029 | 1.410 | [0.761,2.612]  | 0.274 | 0.044 |
| rs10977171 | PTPRD    | C | 0.050 | 1.242 | [0.745,2.072] | 0.405 | 0.625 | [0.191,2.04]  | 0.436 | 0.503 | [0.147,1.726]  | 0.275 | 0.479 |
| rs1805405  | PARP1    | A | 0.216 | 0.919 | [0.692,1.222] | 0.563 | 0.659 | [0.376,1.154] | 0.145 | 0.716 | [0.394,1.303]  | 0.275 | 0.317 |
| rs2072446  | NGFR     | T | 0.044 | 0.808 | [0.455,1.435] | 0.467 | 1.369 | [0.594,3.157] | 0.461 | 1.694 | [0.657,4.365]  | 0.275 | 0.538 |

|            |          |   |       |       |               |       |       |               |       |       |                |       |       |
|------------|----------|---|-------|-------|---------------|-------|-------|---------------|-------|-------|----------------|-------|-------|
| rs1799969  | ICAM1    | A | 0.106 | 0.955 | [0.648,1.408] | 0.818 | 1.411 | [0.74,2.69]   | 0.295 | 1.477 | [0.733,2.977]  | 0.275 | 0.535 |
| rs6136     | SELP     | C | 0.085 | 0.822 | [0.532,1.269] | 0.376 | 1.263 | [0.625,2.552] | 0.516 | 1.537 | [0.71,3.327]   | 0.276 | 0.497 |
| rs1805388  | LIG4     | T | 0.160 | 1.197 | [0.88,1.629]  | 0.252 | 0.830 | [0.445,1.549] | 0.559 | 0.694 | [0.36,1.339]   | 0.276 | 0.393 |
| rs5498     | ICAM1    | G | 0.383 | 0.881 | [0.679,1.143] | 0.338 | 0.657 | [0.403,1.073] | 0.093 | 0.746 | [0.441,1.263]  | 0.276 | 0.184 |
| rs7588635  | MERTK    | A | 0.029 | 1.417 | [0.672,2.987] | 0.360 | 0.576 | [0.125,2.656] | 0.480 | 0.407 | [0.081,2.051]  | 0.276 | 0.469 |
| rs1800797  | IL6      | A | 0.313 | 1.171 | [0.918,1.493] | 0.204 | 0.881 | [0.544,1.428] | 0.608 | 0.753 | [0.452,1.255]  | 0.276 | 0.352 |
| rs215101   | ABCC1    | C | 0.151 | 1.190 | [0.87,1.629]  | 0.277 | 0.828 | [0.446,1.538] | 0.549 | 0.696 | [0.362,1.337]  | 0.276 | 0.415 |
| rs268673   | PRX      | G | 0.390 | 0.833 | [0.653,1.062] | 0.140 | 0.633 | [0.398,1.007] | 0.054 | 0.761 | [0.465,1.245]  | 0.277 | 0.074 |
| rs2228083  | ALAD     | T | 0.092 | 0.978 | [0.64,1.494]  | 0.917 | 0.592 | [0.252,1.389] | 0.228 | 0.605 | [0.245,1.496]  | 0.277 | 0.483 |
| rs4660     | SPP1     | A | 0.014 | 0.451 | [0.096,2.105] | 0.311 | 1.406 | [0.296,6.674] | 0.668 | 3.121 | [0.401,24.291] | 0.277 | 0.512 |
| rs2066479  | HSD17B3  | A | 0.064 | 1.048 | [0.647,1.699] | 0.848 | 1.667 | [0.774,3.587] | 0.191 | 1.590 | [0.688,3.675]  | 0.278 | 0.426 |
| rs12680113 | ZNF596   | T | 0.339 | 0.907 | [0.707,1.164] | 0.443 | 1.170 | [0.765,1.789] | 0.469 | 1.290 | [0.814,2.043]  | 0.278 | 0.521 |
| rs3100697  | HNMT     | C | 0.031 | 2.240 | [1.011,4.964] | 0.047 | 0.993 | [0.256,3.85]  | 0.992 | 0.443 | [0.102,1.93]   | 0.278 | 0.133 |
| rs454078   | IL1RN    | T | 0.251 | 1.126 | [0.854,1.484] | 0.402 | 0.821 | [0.48,1.405]  | 0.472 | 0.730 | [0.412,1.291]  | 0.279 | 0.496 |
| rs7602171  | ABCB11   | A | 0.262 | 0.769 | [0.583,1.014] | 0.063 | 1.027 | [0.632,1.667] | 0.915 | 1.336 | [0.79,2.258]   | 0.280 | 0.167 |
| rs6519270  | NHP2L1   | A | 0.293 | 1.142 | [0.874,1.492] | 0.332 | 0.855 | [0.523,1.397] | 0.531 | 0.749 | [0.443,1.266]  | 0.280 | 0.464 |
| rs1455162  | HNMT     | C | 0.253 | 0.702 | [0.525,0.938] | 0.017 | 0.943 | [0.579,1.538] | 0.815 | 1.344 | [0.786,2.297]  | 0.280 | 0.057 |
| rs2331390  | IGFBP1   | A | 0.473 | 0.987 | [0.779,1.251] | 0.915 | 1.272 | [0.828,1.952] | 0.272 | 1.288 | [0.813,2.041]  | 0.281 | 0.528 |
| rs129116   | ABCC1    | C | 0.310 | 1.122 | [0.864,1.457] | 0.389 | 0.839 | [0.512,1.376] | 0.488 | 0.748 | [0.442,1.268]  | 0.281 | 0.494 |
| rs1137282  | KRAS     | C | 0.207 | 0.980 | [0.742,1.293] | 0.885 | 0.709 | [0.407,1.236] | 0.225 | 0.724 | [0.402,1.303]  | 0.281 | 0.479 |
| rs17473423 | KRAS     | G | 0.207 | 0.980 | [0.742,1.293] | 0.885 | 0.709 | [0.407,1.236] | 0.225 | 0.724 | [0.402,1.303]  | 0.281 | 0.479 |
| rs3769148  | ZAK      | A | 0.408 | 0.908 | [0.71,1.161]  | 0.441 | 0.695 | [0.44,1.096]  | 0.117 | 0.765 | [0.47,1.246]   | 0.282 | 0.250 |
| rs6098     | SERPINB2 | G | 0.257 | 1.393 | [1.069,1.814] | 0.014 | 1.822 | [1.151,2.886] | 0.010 | 1.309 | [0.801,2.137]  | 0.282 | 0.005 |
| rs5742909  | CTLA4    | T | 0.086 | 0.721 | [0.461,1.129] | 0.153 | 0.401 | [0.145,1.111] | 0.079 | 0.556 | [0.19,1.624]   | 0.283 | 0.096 |
| rs3113199  | HNMT     | T | 0.037 | 0.975 | [0.466,2.038] | 0.945 | 0.414 | [0.096,1.783] | 0.236 | 0.424 | [0.088,2.036]  | 0.284 | 0.495 |
| rs2375005  | PON2     | A | 0.499 | 0.962 | [0.76,1.219]  | 0.751 | 0.752 | [0.493,1.145] | 0.184 | 0.781 | [0.497,1.228]  | 0.284 | 0.410 |
| rs1042034  | APOB     | G | 0.227 | 1.007 | [0.755,1.342] | 0.963 | 0.729 | [0.417,1.273] | 0.266 | 0.724 | [0.4,1.31]     | 0.285 | 0.529 |
| rs1202283  | ABCB4    | A | 0.484 | 0.956 | [0.746,1.226] | 0.725 | 0.729 | [0.457,1.164] | 0.185 | 0.763 | [0.463,1.255]  | 0.286 | 0.410 |
| rs348462   | ALDH1A1  | C | 0.344 | 1.021 | [0.794,1.313] | 0.872 | 1.321 | [0.852,2.048] | 0.214 | 1.294 | [0.806,2.077]  | 0.287 | 0.462 |
| rs10018199 | SPOCK3   | G | 0.267 | 0.840 | [0.64,1.1]    | 0.205 | 1.105 | [0.695,1.756] | 0.674 | 1.316 | [0.794,2.18]   | 0.287 | 0.376 |
| rs132806   | NHP2L1   | T | 0.302 | 0.784 | [0.601,1.023] | 0.073 | 1.034 | [0.645,1.659] | 0.888 | 1.319 | [0.791,2.2]    | 0.288 | 0.188 |
| rs546382   | IGHMBP2  | T | 0.263 | 1.210 | [0.928,1.578] | 0.160 | 0.905 | [0.546,1.498] | 0.697 | 0.748 | [0.437,1.279]  | 0.289 | 0.313 |
| rs2076167  | PPARD    | G | 0.287 | 0.807 | [0.614,1.062] | 0.125 | 1.061 | [0.668,1.686] | 0.802 | 1.315 | [0.793,2.179]  | 0.289 | 0.278 |
| rs3743261  | IGF1R    | T | 0.033 | 1.423 | [0.792,2.556] | 0.238 | 0.638 | [0.152,2.685] | 0.540 | 0.449 | [0.102,1.98]   | 0.290 | 0.374 |
| rs183374   | NFATC1   | A | 0.431 | 0.929 | [0.732,1.18]  | 0.546 | 1.194 | [0.775,1.84]  | 0.422 | 1.285 | [0.807,2.045]  | 0.290 | 0.559 |
| rs717620   | ABCC2    | A | 0.162 | 1.237 | [0.904,1.693] | 0.184 | 1.691 | [0.985,2.905] | 0.057 | 1.367 | [0.766,2.441]  | 0.290 | 0.096 |
| rs7804387  | MAD1L1   | A | 0.112 | 1.404 | [0.93,2.119]  | 0.107 | 0.889 | [0.402,1.97]  | 0.773 | 0.634 | [0.272,1.479]  | 0.291 | 0.240 |
| rs7578587  | ABCB11   | C | 0.028 | 0.928 | [0.394,2.186] | 0.865 | 0.288 | [0.036,2.304] | 0.241 | 0.310 | [0.035,2.75]   | 0.293 | 0.501 |
| rs2241868  | HMGCS2   | C | 0.079 | 1.379 | [0.919,2.067] | 0.120 | 0.856 | [0.364,2.014] | 0.721 | 0.621 | [0.255,1.511]  | 0.294 | 0.250 |
| rs12717    | PSMB1    | G | 0.404 | 1.031 | [0.81,1.313]  | 0.803 | 1.322 | [0.86,2.031]  | 0.204 | 1.282 | [0.807,2.036]  | 0.294 | 0.444 |
| rs162555   | CYP1B1   | G | 0.194 | 0.704 | [0.51,0.971]  | 0.032 | 0.966 | [0.563,1.657] | 0.900 | 1.373 | [0.76,2.48]    | 0.294 | 0.100 |

|            |          |   |       |       |               |       |       |               |       |       |               |       |       |
|------------|----------|---|-------|-------|---------------|-------|-------|---------------|-------|-------|---------------|-------|-------|
| rs2301870  | LPO      | T | 0.149 | 0.858 | [0.604,1.218] | 0.391 | 1.196 | [0.68,2.104]  | 0.534 | 1.395 | [0.749,2.595] | 0.294 | 0.522 |
| rs2070874  | IL4      | T | 0.221 | 1.235 | [0.944,1.616] | 0.123 | 0.917 | [0.542,1.552] | 0.746 | 0.742 | [0.425,1.296] | 0.294 | 0.264 |
| rs1148555  | MBD6     | G | 0.164 | 0.719 | [0.516,1.002] | 0.052 | 0.996 | [0.572,1.732] | 0.988 | 1.385 | [0.753,2.545] | 0.294 | 0.146 |
| rs15524    | CYP3A5   | C | 0.171 | 1.178 | [0.835,1.661] | 0.351 | 0.824 | [0.442,1.537] | 0.543 | 0.700 | [0.359,1.364] | 0.295 | 0.489 |
| rs2278294  | IMPDH1   | A | 0.364 | 0.970 | [0.754,1.249] | 0.815 | 1.246 | [0.809,1.92]  | 0.318 | 1.284 | [0.804,2.052] | 0.295 | 0.565 |
| rs17006794 | HELQ     | T | 0.019 | 0.410 | [0.113,1.486] | 0.175 | 1.079 | [0.255,4.571] | 0.918 | 2.630 | [0.43,16.07]  | 0.295 | 0.384 |
| rs3785457  | PCGF2    | A | 0.154 | 0.964 | [0.701,1.327] | 0.824 | 0.659 | [0.334,1.297] | 0.227 | 0.683 | [0.334,1.396] | 0.296 | 0.481 |
| rs162549   | CYP1B1   | T | 0.201 | 0.727 | [0.528,1]     | 0.050 | 0.996 | [0.58,1.711]  | 0.988 | 1.371 | [0.759,2.476] | 0.296 | 0.142 |
| rs11670988 | HIPK4    | T | 0.078 | 1.410 | [0.95,2.093]  | 0.088 | 0.872 | [0.366,2.076] | 0.757 | 0.618 | [0.251,1.524] | 0.296 | 0.200 |
| rs2227564  | C10orf55 | T | 0.222 | 1.082 | [0.82,1.428]  | 0.578 | 0.797 | [0.463,1.372] | 0.412 | 0.736 | [0.414,1.309] | 0.297 | 0.569 |
| rs1061622  | TNFRSF1B | G | 0.234 | 0.994 | [0.754,1.311] | 0.966 | 1.299 | [0.817,2.066] | 0.268 | 1.307 | [0.79,2.165]  | 0.298 | 0.530 |
| rs1800790  | FGB      | A | 0.168 | 1.257 | [0.923,1.712] | 0.147 | 0.893 | [0.486,1.644] | 0.717 | 0.711 | [0.374,1.352] | 0.298 | 0.297 |
| rs2302387  | ABCB4    | A | 0.181 | 0.985 | [0.718,1.352] | 0.926 | 1.332 | [0.79,2.248]  | 0.282 | 1.353 | [0.766,2.389] | 0.298 | 0.542 |
| rs2069522  | CYP1A2   | C | 0.050 | 0.968 | [0.562,1.668] | 0.906 | 1.535 | [0.705,3.343] | 0.280 | 1.586 | [0.665,3.786] | 0.299 | 0.533 |
| rs664393   | FLT1     | A | 0.107 | 0.952 | [0.651,1.392] | 0.799 | 1.384 | [0.721,2.658] | 0.329 | 1.454 | [0.718,2.948] | 0.299 | 0.573 |
| rs7853758  | SLC28A3  | A | 0.175 | 1.149 | [0.84,1.57]   | 0.385 | 0.826 | [0.462,1.475] | 0.518 | 0.719 | [0.386,1.34]  | 0.299 | 0.511 |
| rs1855363  | DPYD     | A | 0.034 | 2.589 | [1.412,4.749] | 0.002 | 1.396 | [0.46,4.241]  | 0.556 | 0.539 | [0.168,1.729] | 0.299 | 0.009 |
| rs13652    | FN1      | G | 0.130 | 1.143 | [0.81,1.612]  | 0.448 | 0.789 | [0.409,1.522] | 0.480 | 0.691 | [0.343,1.389] | 0.299 | 0.537 |
| rs1800451  | MBL2     | A | 0.062 | 0.998 | [0.575,1.733] | 0.995 | 1.594 | [0.725,3.505] | 0.246 | 1.597 | [0.66,3.864]  | 0.300 | 0.500 |
| rs713865   | CACNA1I  | T | 0.409 | 1.018 | [0.804,1.288] | 0.883 | 0.792 | [0.508,1.235] | 0.304 | 0.778 | [0.485,1.249] | 0.300 | 0.565 |
| rs4149057  | SLCO1B1  | T | 0.463 | 1.330 | [1.053,1.681] | 0.017 | 1.045 | [0.682,1.6]   | 0.841 | 0.785 | [0.497,1.24]  | 0.300 | 0.057 |
| rs25882    | CSF2     | C | 0.229 | 0.852 | [0.644,1.128] | 0.262 | 1.117 | [0.698,1.788] | 0.644 | 1.312 | [0.785,2.19]  | 0.300 | 0.439 |
| rs622082   | IGHMBP2  | G | 0.262 | 1.180 | [0.903,1.541] | 0.225 | 0.881 | [0.524,1.482] | 0.634 | 0.747 | [0.43,1.297]  | 0.300 | 0.389 |
| rs248805   | SRD5A1   | A | 0.457 | 0.882 | [0.698,1.114] | 0.292 | 1.123 | [0.733,1.719] | 0.594 | 1.273 | [0.806,2.012] | 0.300 | 0.455 |
| rs3743260  | IGF1R    | A | 0.032 | 1.511 | [0.832,2.747] | 0.175 | 0.689 | [0.163,2.908] | 0.612 | 0.456 | [0.103,2.014] | 0.300 | 0.315 |
| rs1799955  | BRCA2    | G | 0.225 | 1.003 | [0.749,1.344] | 0.984 | 1.334 | [0.81,2.197]  | 0.258 | 1.330 | [0.775,2.282] | 0.301 | 0.522 |
| rs2640     | EIF2AK1  | C | 0.058 | 0.844 | [0.507,1.407] | 0.516 | 1.352 | [0.603,3.033] | 0.464 | 1.601 | [0.656,3.909] | 0.301 | 0.573 |
| rs1040090  | DPYD     | A | 0.153 | 1.074 | [0.779,1.48]  | 0.663 | 0.751 | [0.396,1.426] | 0.382 | 0.700 | [0.355,1.377] | 0.301 | 0.584 |
| rs6413436  | RAD52    | C | 0.392 | 1.167 | [0.912,1.493] | 0.219 | 1.508 | [0.956,2.379] | 0.077 | 1.292 | [0.794,2.103] | 0.302 | 0.128 |
| rs2269352  | UGT1A8   | C | 0.197 | 0.933 | [0.645,1.351] | 0.715 | 0.620 | [0.297,1.293] | 0.202 | 0.664 | [0.305,1.444] | 0.302 | 0.436 |
| rs943584   | PLEKHG5  | T | 0.105 | 1.068 | [0.709,1.608] | 0.754 | 0.655 | [0.273,1.572] | 0.343 | 0.613 | [0.243,1.552] | 0.302 | 0.587 |
| rs1029871  | NEK4     | G | 0.377 | 0.982 | [0.769,1.254] | 0.883 | 0.756 | [0.473,1.208] | 0.241 | 0.770 | [0.468,1.266] | 0.302 | 0.504 |
| rs8832     | IL4R     | G | 0.489 | 0.916 | [0.721,1.163] | 0.472 | 1.171 | [0.758,1.811] | 0.477 | 1.279 | [0.801,2.04]  | 0.302 | 0.553 |
| rs138056   | SULT4A1  | A | 0.218 | 1.115 | [0.836,1.489] | 0.459 | 1.479 | [0.9,2.429]   | 0.122 | 1.326 | [0.775,2.268] | 0.303 | 0.265 |
| rs4149056  | SLCO1B1  | C | 0.127 | 1.141 | [0.812,1.603] | 0.446 | 1.567 | [0.897,2.737] | 0.115 | 1.373 | [0.751,2.508] | 0.303 | 0.254 |
| rs1851426  | CYP3A4   | T | 0.150 | 1.554 | [1.006,2.402] | 0.047 | 1.046 | [0.529,2.066] | 0.897 | 0.673 | [0.317,1.43]  | 0.303 | 0.137 |
| rs1469167  | ALDH1A1  | G | 0.089 | 1.047 | [0.677,1.62]  | 0.836 | 1.550 | [0.786,3.056] | 0.206 | 1.480 | [0.701,3.126] | 0.304 | 0.450 |
| rs664982   | ATM      | G | 0.469 | 0.934 | [0.742,1.176] | 0.562 | 0.738 | [0.485,1.123] | 0.156 | 0.790 | [0.504,1.239] | 0.304 | 0.339 |
| rs500760   | PGR      | G | 0.253 | 0.852 | [0.646,1.122] | 0.254 | 1.114 | [0.693,1.79]  | 0.655 | 1.308 | [0.783,2.185] | 0.304 | 0.430 |
| rs10018280 | PDE5A    | G | 0.308 | 1.047 | [0.814,1.345] | 0.722 | 1.347 | [0.86,2.109]  | 0.193 | 1.287 | [0.795,2.084] | 0.305 | 0.422 |
| rs1520658  | DPYD     | G | 0.128 | 0.922 | [0.653,1.302] | 0.645 | 1.271 | [0.722,2.235] | 0.406 | 1.378 | [0.746,2.546] | 0.306 | 0.592 |

|            |              |   |       |       |               |       |       |               |       |       |                |       |       |
|------------|--------------|---|-------|-------|---------------|-------|-------|---------------|-------|-------|----------------|-------|-------|
| rs2217332  | HERPUD1      | T | 0.140 | 0.991 | [0.711,1.38]  | 0.956 | 1.349 | [0.783,2.324] | 0.281 | 1.362 | [0.754,2.46]   | 0.306 | 0.545 |
| rs2227631  | SERPINE1     | G | 0.481 | 0.922 | [0.723,1.174] | 0.509 | 1.177 | [0.76,1.822]  | 0.466 | 1.277 | [0.799,2.04]   | 0.306 | 0.568 |
| rs5275     | PTGS2        | C | 0.406 | 1.008 | [0.787,1.29]  | 0.952 | 0.784 | [0.501,1.227] | 0.287 | 0.778 | [0.481,1.259]  | 0.307 | 0.555 |
| rs6427384  | FCRL5        | C | 0.221 | 0.798 | [0.585,1.088] | 0.153 | 0.575 | [0.32,1.034]  | 0.065 | 0.720 | [0.384,1.352]  | 0.307 | 0.087 |
| rs1800391  | WRN          | A | 0.069 | 0.733 | [0.448,1.197] | 0.214 | 0.381 | [0.114,1.27]  | 0.116 | 0.520 | [0.148,1.825]  | 0.307 | 0.160 |
| rs6104     | SERPINB2     | G | 0.257 | 1.400 | [1.073,1.827] | 0.013 | 1.810 | [1.141,2.87]  | 0.012 | 1.292 | [0.79,2.114]   | 0.307 | 0.005 |
| rs3212723  | JAK3         | A | 0.016 | 1.276 | [0.517,3.153] | 0.597 | 0.410 | [0.05,3.326]  | 0.404 | 0.321 | [0.036,2.852]  | 0.308 | 0.579 |
| rs2235048  | ABCB1        | C | 0.475 | 0.877 | [0.691,1.114] | 0.283 | 0.689 | [0.447,1.063] | 0.092 | 0.785 | [0.493,1.25]   | 0.308 | 0.169 |
| rs3125001  | NOTCH1       | T | 0.444 | 1.210 | [0.891,1.643] | 0.222 | 0.903 | [0.536,1.521] | 0.702 | 0.747 | [0.425,1.31]   | 0.309 | 0.402 |
| rs549908   | IL18         | G | 0.290 | 1.031 | [0.802,1.325] | 0.813 | 1.321 | [0.846,2.063] | 0.220 | 1.282 | [0.794,2.069]  | 0.309 | 0.471 |
| rs428073   | LOC100130562 | C | 0.320 | 0.893 | [0.692,1.154] | 0.387 | 1.156 | [0.73,1.831]  | 0.537 | 1.294 | [0.788,2.125]  | 0.309 | 0.525 |
| rs2071426  | CYP2C8       | G | 0.272 | 0.730 | [0.552,0.966] | 0.028 | 0.964 | [0.589,1.579] | 0.884 | 1.320 | [0.773,2.253]  | 0.309 | 0.087 |
| rs2066853  | AHR          | A | 0.168 | 0.876 | [0.62,1.239]  | 0.455 | 1.204 | [0.692,2.096] | 0.511 | 1.374 | [0.744,2.538]  | 0.309 | 0.565 |
| rs3113224  | HNMT         | A | 0.253 | 0.713 | [0.534,0.952] | 0.022 | 0.941 | [0.577,1.535] | 0.808 | 1.320 | [0.773,2.256]  | 0.309 | 0.071 |
| rs1053046  | PPARD        | A | 0.122 | 0.900 | [0.601,1.348] | 0.610 | 0.586 | [0.271,1.27]  | 0.176 | 0.651 | [0.285,1.489]  | 0.310 | 0.377 |
| rs1799949  | BRCA1        | T | 0.288 | 0.845 | [0.653,1.094] | 0.200 | 1.093 | [0.689,1.734] | 0.705 | 1.294 | [0.786,2.13]   | 0.311 | 0.378 |
| rs619487   | PGR          | G | 0.279 | 1.171 | [0.898,1.528] | 0.244 | 0.886 | [0.534,1.471] | 0.640 | 0.757 | [0.441,1.297]  | 0.311 | 0.416 |
| rs502570   | ABCB11       | T | 0.281 | 1.102 | [0.856,1.419] | 0.451 | 1.412 | [0.903,2.209] | 0.131 | 1.281 | [0.793,2.07]   | 0.311 | 0.277 |
| rs2235000  | ATM          | A | 0.012 | 2.588 | [0.96,6.971]  | 0.060 | 0.827 | [0.099,6.909] | 0.861 | 0.320 | [0.035,2.905]  | 0.311 | 0.154 |
| rs2641806  | CHST5        | C | 0.409 | 1.275 | [1.003,1.621] | 0.047 | 1.000 | [0.644,1.553] | 0.999 | 0.784 | [0.49,1.255]   | 0.311 | 0.133 |
| rs521102   | CHEK1        | T | 0.467 | 1.229 | [0.965,1.565] | 0.095 | 0.966 | [0.626,1.491] | 0.876 | 0.786 | [0.493,1.253]  | 0.312 | 0.229 |
| rs212087   | ABCC1        | T | 0.389 | 0.959 | [0.748,1.228] | 0.738 | 1.231 | [0.783,1.935] | 0.369 | 1.284 | [0.791,2.083]  | 0.312 | 0.599 |
| rs2301157  | SLC10A2      | T | 0.490 | 1.255 | [0.987,1.597] | 0.064 | 0.986 | [0.638,1.525] | 0.951 | 0.786 | [0.492,1.254]  | 0.312 | 0.170 |
| rs2536512  | SOD3         | G | 0.457 | 1.060 | [0.828,1.357] | 0.644 | 0.829 | [0.532,1.292] | 0.407 | 0.782 | [0.485,1.26]   | 0.312 | 0.599 |
| rs599554   | CTDP1        | A | 0.183 | 0.899 | [0.658,1.227] | 0.501 | 1.201 | [0.718,2.012] | 0.485 | 1.337 | [0.761,2.35]   | 0.313 | 0.580 |
| rs10034373 | WHSC1        | T | 0.021 | 0.911 | [0.355,2.332] | 0.845 | 0.292 | [0.036,2.351] | 0.247 | 0.321 | [0.035,2.924]  | 0.313 | 0.510 |
| rs230533   | NFKB1        | T | 0.309 | 1.184 | [0.92,1.523]  | 0.190 | 0.912 | [0.567,1.466] | 0.704 | 0.770 | [0.464,1.279]  | 0.313 | 0.362 |
| rs913118   | MGMT         | T | 0.440 | 0.866 | [0.682,1.101] | 0.240 | 1.098 | [0.715,1.688] | 0.668 | 1.268 | [0.799,2.013]  | 0.314 | 0.420 |
| rs930508   | MBL2         | G | 0.215 | 1.050 | [0.785,1.404] | 0.744 | 1.372 | [0.85,2.217]  | 0.196 | 1.308 | [0.776,2.204]  | 0.314 | 0.429 |
| rs2275586  | MMS19        | G | 0.044 | 0.758 | [0.4,1.437]   | 0.396 | 0.346 | [0.082,1.469] | 0.150 | 0.457 | [0.1,2.099]    | 0.314 | 0.275 |
| rs7096206  | MBL2         | G | 0.202 | 0.942 | [0.699,1.271] | 0.697 | 1.253 | [0.751,2.089] | 0.388 | 1.329 | [0.763,2.317]  | 0.315 | 0.603 |
| rs1800629  | TNF          | A | 0.169 | 1.166 | [0.848,1.602] | 0.345 | 0.831 | [0.446,1.549] | 0.560 | 0.713 | [0.369,1.379]  | 0.315 | 0.495 |
| rs11572076 | CYP2C8       | A | 0.029 | 0.395 | [0.133,1.171] | 0.094 | 0.896 | [0.248,3.245] | 0.868 | 2.267 | [0.458,11.219] | 0.316 | 0.246 |
| rs1124     | BMP1         | A | 0.288 | 1.073 | [0.801,1.437] | 0.638 | 0.795 | [0.46,1.374]  | 0.411 | 0.741 | [0.412,1.331]  | 0.316 | 0.602 |
| rs1934962  | CYP2C9       | T | 0.026 | 1.352 | [0.562,3.256] | 0.501 | 2.763 | [0.808,9.449] | 0.105 | 2.043 | [0.504,8.277]  | 0.317 | 0.245 |
| rs2275008  | OSGEP        | G | 0.309 | 1.001 | [0.778,1.289] | 0.993 | 0.770 | [0.475,1.247] | 0.288 | 0.769 | [0.459,1.287]  | 0.318 | 0.563 |
| rs2108622  | CYP4F2       | T | 0.266 | 0.998 | [0.77,1.294]  | 0.990 | 0.759 | [0.458,1.259] | 0.286 | 0.760 | [0.444,1.301]  | 0.318 | 0.561 |
| rs2270565  | UCP1         | A | 0.067 | 1.094 | [0.692,1.73]  | 0.699 | 1.629 | [0.799,3.322] | 0.180 | 1.488 | [0.682,3.248]  | 0.318 | 0.401 |
| rs7563233  | ABCB11       | C | 0.074 | 1.306 | [0.777,2.193] | 0.313 | 0.774 | [0.298,2.011] | 0.599 | 0.593 | [0.212,1.655]  | 0.318 | 0.484 |
| rs12114000 | CYP3A4       | A | 0.032 | 1.129 | [0.524,2.434] | 0.757 | 0.491 | [0.106,2.285] | 0.365 | 0.435 | [0.085,2.231]  | 0.318 | 0.607 |
| rs1799986  | LRP1         | T | 0.116 | 0.634 | [0.424,0.949] | 0.027 | 0.923 | [0.474,1.799] | 0.814 | 1.456 | [0.695,3.047]  | 0.319 | 0.086 |

|            |         |   |       |       |               |       |       |               |       |       |               |       |       |
|------------|---------|---|-------|-------|---------------|-------|-------|---------------|-------|-------|---------------|-------|-------|
| rs868891   | MON1A   | C | 0.386 | 1.115 | [0.879,1.413] | 0.370 | 0.877 | [0.563,1.364] | 0.560 | 0.787 | [0.49,1.262]  | 0.320 | 0.520 |
| rs676210   | APOB    | A | 0.228 | 0.994 | [0.745,1.325] | 0.965 | 0.735 | [0.42,1.286]  | 0.281 | 0.739 | [0.408,1.341] | 0.320 | 0.556 |
| rs3797897  | MSH3    | G | 0.088 | 1.228 | [0.833,1.811] | 0.300 | 1.727 | [0.92,3.244]  | 0.089 | 1.407 | [0.718,2.755] | 0.320 | 0.183 |
| rs3752988  | CYP2C8  | C | 0.331 | 1.152 | [0.894,1.485] | 0.273 | 0.895 | [0.563,1.424] | 0.641 | 0.777 | [0.472,1.279] | 0.321 | 0.453 |
| rs4128474  | DPYD    | C | 0.096 | 1.058 | [0.719,1.557] | 0.775 | 0.674 | [0.29,1.571]  | 0.361 | 0.638 | [0.262,1.553] | 0.322 | 0.611 |
| rs2269429  | TNXB    | A | 0.098 | 1.111 | [0.756,1.632] | 0.593 | 0.731 | [0.334,1.599] | 0.432 | 0.658 | [0.287,1.508] | 0.322 | 0.600 |
| rs10743597 | A2M     | G | 0.331 | 0.931 | [0.732,1.184] | 0.560 | 1.171 | [0.768,1.784] | 0.463 | 1.258 | [0.799,1.981] | 0.323 | 0.600 |
| rs11549465 | HIF1A   | T | 0.088 | 0.817 | [0.527,1.266] | 0.365 | 1.192 | [0.605,2.349] | 0.611 | 1.460 | [0.69,3.091]  | 0.323 | 0.537 |
| rs9328764  | POLN    | A | 0.205 | 0.827 | [0.6,1.141]   | 0.247 | 1.112 | [0.65,1.903]  | 0.699 | 1.344 | [0.748,2.418] | 0.323 | 0.440 |
| rs2352984  | MON1A   | C | 0.412 | 1.098 | [0.869,1.387] | 0.434 | 0.870 | [0.565,1.339] | 0.526 | 0.792 | [0.499,1.257] | 0.323 | 0.557 |
| rs1652342  | C18orf8 | G | 0.306 | 0.809 | [0.62,1.055]  | 0.118 | 1.045 | [0.653,1.673] | 0.854 | 1.292 | [0.778,2.145] | 0.323 | 0.272 |
| rs6041759  | FKBP1A  | C | 0.120 | 1.025 | [0.704,1.492] | 0.897 | 0.688 | [0.327,1.448] | 0.325 | 0.671 | [0.304,1.482] | 0.324 | 0.597 |
| rs1143627  | IL1B    | C | 0.394 | 1.142 | [0.899,1.451] | 0.277 | 0.901 | [0.58,1.399]  | 0.642 | 0.789 | [0.492,1.265] | 0.324 | 0.458 |
| rs196912   | ERN1    | T | 0.305 | 0.980 | [0.749,1.282] | 0.882 | 1.253 | [0.798,1.968] | 0.327 | 1.279 | [0.784,2.088] | 0.325 | 0.592 |
| rs17829584 | PPP3CA  | C | 0.125 | 0.844 | [0.575,1.24]  | 0.387 | 1.195 | [0.634,2.251] | 0.581 | 1.416 | [0.706,2.838] | 0.327 | 0.549 |
| rs241448   | TAP2    | C | 0.229 | 0.976 | [0.746,1.278] | 0.862 | 0.738 | [0.435,1.252] | 0.260 | 0.756 | [0.431,1.324] | 0.327 | 0.530 |
| rs2274407  | ABCC4   | A | 0.094 | 1.105 | [0.732,1.67]  | 0.634 | 0.734 | [0.339,1.589] | 0.433 | 0.664 | [0.293,1.507] | 0.328 | 0.614 |
| rs3816540  | RPS6KA1 | C | 0.185 | 0.817 | [0.599,1.115] | 0.203 | 1.096 | [0.638,1.881] | 0.741 | 1.340 | [0.745,2.412] | 0.328 | 0.393 |
| rs2296241  | CYP24A1 | G | 0.479 | 1.156 | [0.919,1.453] | 0.216 | 1.449 | [0.947,2.218] | 0.087 | 1.254 | [0.796,1.975] | 0.328 | 0.140 |
| rs2291075  | SLCO1B1 | T | 0.418 | 1.022 | [0.807,1.295] | 0.856 | 0.808 | [0.52,1.256]  | 0.344 | 0.791 | [0.493,1.267] | 0.329 | 0.609 |
| rs1065341  | CCL5    | G | 0.073 | 0.930 | [0.574,1.507] | 0.769 | 0.552 | [0.206,1.484] | 0.239 | 0.594 | [0.208,1.695] | 0.330 | 0.494 |
| rs2229712  | RPS6KA1 | C | 0.184 | 0.820 | [0.601,1.118] | 0.210 | 1.097 | [0.639,1.885] | 0.736 | 1.339 | [0.744,2.409] | 0.330 | 0.401 |
| rs3770601  | ABCB11  | T | 0.089 | 0.809 | [0.52,1.258]  | 0.347 | 1.190 | [0.59,2.401]  | 0.627 | 1.471 | [0.676,3.198] | 0.330 | 0.531 |
| rs2070673  | CYP2E1  | A | 0.263 | 0.881 | [0.65,1.194]  | 0.414 | 1.172 | [0.689,1.994] | 0.559 | 1.330 | [0.748,2.363] | 0.331 | 0.559 |
| rs932477   | ESR1    | A | 0.122 | 1.012 | [0.709,1.446] | 0.946 | 0.697 | [0.343,1.417] | 0.319 | 0.688 | [0.324,1.462] | 0.331 | 0.597 |
| rs2109505  | ABCB4   | A | 0.197 | 0.946 | [0.699,1.28]  | 0.720 | 1.246 | [0.747,2.076] | 0.399 | 1.316 | [0.756,2.293] | 0.331 | 0.623 |
| rs1799782  | XRCC1   | T | 0.084 | 0.785 | [0.506,1.22]  | 0.282 | 1.145 | [0.575,2.282] | 0.700 | 1.458 | [0.681,3.122] | 0.331 | 0.482 |
| rs1800610  | TNF     | T | 0.085 | 0.911 | [0.588,1.411] | 0.675 | 1.352 | [0.65,2.811]  | 0.420 | 1.485 | [0.669,3.296] | 0.332 | 0.624 |
| rs5743612  | TLR1    | T | 0.015 | 1.435 | [0.534,3.859] | 0.474 | 0.479 | [0.059,3.878] | 0.490 | 0.334 | [0.036,3.063] | 0.332 | 0.575 |
| rs1051640  | ABCC3   | G | 0.148 | 0.952 | [0.675,1.343] | 0.779 | 1.303 | [0.726,2.342] | 0.375 | 1.369 | [0.726,2.584] | 0.332 | 0.620 |
| rs11632814 | CYP1A2  | A | 0.051 | 1.006 | [0.589,1.719] | 0.981 | 1.544 | [0.709,3.362] | 0.274 | 1.534 | [0.646,3.641] | 0.332 | 0.542 |
| rs3763497  | IGFBP1  | T | 0.318 | 0.982 | [0.765,1.259] | 0.883 | 0.764 | [0.474,1.231] | 0.268 | 0.778 | [0.468,1.293] | 0.333 | 0.542 |
| rs215073   | ABCC1   | A | 0.066 | 1.100 | [0.684,1.77]  | 0.693 | 1.634 | [0.787,3.392] | 0.188 | 1.485 | [0.667,3.306] | 0.333 | 0.414 |
| rs11875    | MGST1   | A | 0.072 | 0.750 | [0.467,1.205] | 0.234 | 1.131 | [0.535,2.394] | 0.747 | 1.509 | [0.655,3.476] | 0.334 | 0.440 |
| rs2256974  | LST1    | T | 0.228 | 1.063 | [0.795,1.422] | 0.679 | 0.799 | [0.465,1.373] | 0.416 | 0.751 | [0.421,1.342] | 0.334 | 0.626 |
| rs4760     | PLAUR   | C | 0.123 | 1.226 | [0.855,1.758] | 0.267 | 0.840 | [0.406,1.739] | 0.639 | 0.685 | [0.318,1.476] | 0.334 | 0.445 |
| rs2227551  | PLAU    | G | 0.320 | 1.310 | [1.023,1.678] | 0.033 | 1.035 | [0.662,1.619] | 0.880 | 0.790 | [0.49,1.275]  | 0.335 | 0.100 |
| rs1625895  | TP53    | A | 0.145 | 0.812 | [0.572,1.154] | 0.246 | 0.560 | [0.277,1.136] | 0.108 | 0.690 | [0.325,1.467] | 0.335 | 0.168 |
| rs2070672  | CYP2E1  | G | 0.049 | 1.079 | [0.617,1.887] | 0.789 | 1.721 | [0.732,4.044] | 0.213 | 1.594 | [0.618,4.115] | 0.335 | 0.459 |
| rs2297322  | SLC15A1 | T | 0.167 | 1.032 | [0.762,1.399] | 0.838 | 0.756 | [0.417,1.372] | 0.358 | 0.732 | [0.389,1.38]  | 0.335 | 0.622 |
| rs4529     | TBXAS1  | G | 0.018 | 2.357 | [0.993,5.598] | 0.052 | 1.026 | [0.206,5.105] | 0.975 | 0.435 | [0.08,2.367]  | 0.336 | 0.145 |

|            |          |   |       |       |               |       |       |               |       |       |                |       |       |
|------------|----------|---|-------|-------|---------------|-------|-------|---------------|-------|-------|----------------|-------|-------|
| rs1800787  | FGB      | T | 0.180 | 1.249 | [0.923,1.691] | 0.149 | 0.924 | [0.517,1.65]  | 0.788 | 0.739 | [0.4,1.368]    | 0.336 | 0.315 |
| rs1505     | CYP2C9   | C | 0.340 | 0.951 | [0.745,1.214] | 0.687 | 0.744 | [0.466,1.188] | 0.216 | 0.783 | [0.475,1.289]  | 0.336 | 0.452 |
| rs1005658  | TSPO     | A | 0.311 | 1.115 | [0.875,1.421] | 0.379 | 1.395 | [0.912,2.133] | 0.125 | 1.251 | [0.793,1.974]  | 0.336 | 0.248 |
| rs16147    | NPY      | G | 0.488 | 0.860 | [0.675,1.096] | 0.222 | 0.679 | [0.433,1.065] | 0.092 | 0.790 | [0.489,1.277]  | 0.336 | 0.147 |
| rs4150526  | GTF2H1   | G | 0.290 | 1.220 | [0.949,1.569] | 0.120 | 0.954 | [0.595,1.529] | 0.844 | 0.782 | [0.473,1.292]  | 0.336 | 0.273 |
| rs3738099  | ALPL     | G | 0.148 | 1.000 | [0.713,1.402] | 0.999 | 1.341 | [0.776,2.318] | 0.293 | 1.341 | [0.737,2.439]  | 0.336 | 0.568 |
| rs1805386  | LIG4     | C | 0.164 | 0.937 | [0.679,1.293] | 0.692 | 1.254 | [0.726,2.165] | 0.417 | 1.338 | [0.739,2.423]  | 0.336 | 0.630 |
| rs1126667  | ALOX12   | A | 0.409 | 0.942 | [0.741,1.197] | 0.624 | 1.179 | [0.771,1.804] | 0.447 | 1.252 | [0.792,1.98]   | 0.337 | 0.626 |
| rs4713853  | PPARD    | C | 0.199 | 0.894 | [0.635,1.258] | 0.519 | 1.228 | [0.673,2.242] | 0.504 | 1.374 | [0.718,2.632]  | 0.338 | 0.606 |
| rs1805389  | LIG4     | T | 0.047 | 1.587 | [0.948,2.656] | 0.079 | 0.870 | [0.264,2.873] | 0.820 | 0.549 | [0.16,1.878]   | 0.339 | 0.190 |
| rs1881420  | ALK      | G | 0.287 | 0.953 | [0.738,1.231] | 0.714 | 1.206 | [0.771,1.888] | 0.412 | 1.265 | [0.781,2.05]   | 0.339 | 0.634 |
| rs215072   | ABCC1    | T | 0.065 | 1.156 | [0.714,1.872] | 0.556 | 1.718 | [0.818,3.611] | 0.153 | 1.487 | [0.658,3.356]  | 0.340 | 0.339 |
| rs2251660  | RDM1     | G | 0.189 | 1.013 | [0.741,1.384] | 0.938 | 0.741 | [0.406,1.353] | 0.329 | 0.732 | [0.386,1.39]   | 0.340 | 0.608 |
| rs1219663  | ACBD3    | C | 0.224 | 0.931 | [0.705,1.23]  | 0.617 | 1.199 | [0.744,1.932] | 0.457 | 1.287 | [0.766,2.161]  | 0.340 | 0.630 |
| rs4531     | DBH      | T | 0.083 | 1.152 | [0.755,1.759] | 0.512 | 1.640 | [0.841,3.2]   | 0.146 | 1.424 | [0.689,2.943]  | 0.340 | 0.320 |
| rs2242664  | SLC44A4  | G | 0.445 | 1.070 | [0.845,1.356] | 0.573 | 1.332 | [0.877,2.021] | 0.179 | 1.244 | [0.794,1.949]  | 0.341 | 0.377 |
| rs1799950  | BRCA1    | G | 0.056 | 0.634 | [0.364,1.105] | 0.108 | 1.011 | [0.43,2.375]  | 0.980 | 1.593 | [0.611,4.156]  | 0.341 | 0.268 |
| rs6133     | SELP     | T | 0.181 | 0.966 | [0.684,1.364] | 0.843 | 1.305 | [0.739,2.304] | 0.359 | 1.351 | [0.727,2.511]  | 0.341 | 0.620 |
| rs925585   | IGF1R    | C | 0.152 | 1.084 | [0.779,1.507] | 0.632 | 1.439 | [0.843,2.459] | 0.182 | 1.328 | [0.74,2.382]   | 0.341 | 0.395 |
| rs12636461 | PPARG    | G | 0.282 | 0.950 | [0.734,1.229] | 0.696 | 1.203 | [0.766,1.888] | 0.422 | 1.266 | [0.779,2.059]  | 0.341 | 0.636 |
| rs3803036  | PTPRR    | A | 0.274 | 0.962 | [0.724,1.276] | 0.786 | 0.730 | [0.43,1.24]   | 0.244 | 0.759 | [0.43,1.339]   | 0.342 | 0.503 |
| rs828063   | DPYD     | A | 0.170 | 1.107 | [0.802,1.528] | 0.538 | 1.461 | [0.862,2.478] | 0.159 | 1.321 | [0.744,2.343]  | 0.342 | 0.343 |
| rs656583   | LRP5     | C | 0.050 | 0.515 | [0.243,1.091] | 0.083 | 0.887 | [0.345,2.28]  | 0.803 | 1.722 | [0.558,5.312]  | 0.344 | 0.223 |
| rs13926    | TRAP1    | G | 0.392 | 0.868 | [0.678,1.109] | 0.257 | 1.090 | [0.701,1.695] | 0.701 | 1.257 | [0.782,2.019]  | 0.345 | 0.453 |
| rs2272037  | IGF1R    | A | 0.465 | 1.074 | [0.842,1.371] | 0.566 | 0.851 | [0.542,1.336] | 0.483 | 0.792 | [0.489,1.284]  | 0.345 | 0.623 |
| rs1065780  | IGFBP1   | A | 0.410 | 0.956 | [0.755,1.211] | 0.711 | 0.763 | [0.493,1.182] | 0.226 | 0.798 | [0.5,1.275]    | 0.346 | 0.471 |
| rs1805407  | PARP1    | G | 0.226 | 0.918 | [0.69,1.222]  | 0.559 | 0.691 | [0.397,1.202] | 0.190 | 0.752 | [0.416,1.359]  | 0.346 | 0.387 |
| rs1799799  | ERCC4    | C | 0.367 | 1.100 | [0.862,1.403] | 0.445 | 0.871 | [0.553,1.371] | 0.551 | 0.792 | [0.488,1.286]  | 0.346 | 0.582 |
| rs2758346  | SOD2     | T | 0.488 | 1.269 | [1.004,1.605] | 0.047 | 1.019 | [0.666,1.56]  | 0.930 | 0.803 | [0.509,1.267]  | 0.346 | 0.135 |
| rs12714192 | APOB     | A | 0.019 | 0.479 | [0.139,1.658] | 0.246 | 1.091 | [0.29,4.094]  | 0.898 | 2.275 | [0.411,12.598] | 0.347 | 0.493 |
| rs1805408  | PARP1    | G | 0.221 | 0.918 | [0.69,1.221]  | 0.557 | 0.692 | [0.399,1.201] | 0.191 | 0.754 | [0.418,1.359]  | 0.347 | 0.387 |
| rs241440   | TAP2     | A | 0.215 | 0.942 | [0.716,1.239] | 0.668 | 0.713 | [0.413,1.233] | 0.227 | 0.757 | [0.424,1.352]  | 0.348 | 0.464 |
| rs17064676 | NEIL3    | G | 0.018 | 1.032 | [0.372,2.864] | 0.951 | 2.098 | [0.606,7.263] | 0.242 | 2.032 | [0.461,8.95]   | 0.349 | 0.501 |
| rs1929860  | CDC42BPA | A | 0.321 | 1.049 | [0.813,1.353] | 0.715 | 1.323 | [0.84,2.084]  | 0.226 | 1.262 | [0.776,2.054]  | 0.349 | 0.473 |
| rs2307145  | IL12RB2  | C | 0.047 | 0.876 | [0.503,1.526] | 0.640 | 0.435 | [0.106,1.782] | 0.247 | 0.496 | [0.114,2.15]   | 0.349 | 0.480 |
| rs7195066  | FANCA    | T | 0.393 | 1.160 | [0.914,1.472] | 0.223 | 1.447 | [0.939,2.228] | 0.094 | 1.247 | [0.785,1.98]   | 0.349 | 0.151 |
| rs1983346  | NDC80    | C | 0.216 | 1.040 | [0.779,1.388] | 0.790 | 0.785 | [0.451,1.365] | 0.391 | 0.755 | [0.419,1.361]  | 0.350 | 0.644 |
| rs16963927 | CCL5     | G | 0.071 | 0.961 | [0.591,1.563] | 0.873 | 0.581 | [0.215,1.571] | 0.285 | 0.604 | [0.21,1.736]   | 0.350 | 0.564 |
| rs873301   | SUMO3    | T | 0.138 | 0.713 | [0.492,1.034] | 0.074 | 0.474 | [0.21,1.067]  | 0.071 | 0.664 | [0.281,1.567]  | 0.350 | 0.054 |
| rs12954    | FMO1     | A | 0.142 | 1.140 | [0.823,1.58]  | 0.430 | 1.503 | [0.881,2.564] | 0.135 | 1.318 | [0.738,2.352]  | 0.351 | 0.281 |
| rs696221   | SEC13    | C | 0.407 | 1.097 | [0.866,1.389] | 0.442 | 0.882 | [0.575,1.353] | 0.564 | 0.804 | [0.508,1.272]  | 0.351 | 0.587 |

|            |              |   |       |       |               |       |       |                |       |       |               |       |       |
|------------|--------------|---|-------|-------|---------------|-------|-------|----------------|-------|-------|---------------|-------|-------|
| rs8192284  | IL6R         | C | 0.353 | 1.093 | [0.853,1.4]   | 0.482 | 0.863 | [0.541,1.376]  | 0.535 | 0.789 | [0.48,1.299]  | 0.352 | 0.602 |
| rs885622   | DPYD         | A | 0.306 | 0.925 | [0.72,1.188]  | 0.541 | 1.165 | [0.742,1.829]  | 0.508 | 1.259 | [0.775,2.046] | 0.352 | 0.625 |
| rs3741367  | CD248        | C | 0.403 | 0.975 | [0.768,1.239] | 0.837 | 1.213 | [0.79,1.864]   | 0.377 | 1.244 | [0.785,1.973] | 0.353 | 0.641 |
| rs17567    | EPS15        | C | 0.268 | 1.191 | [0.914,1.553] | 0.196 | 0.932 | [0.575,1.511]  | 0.775 | 0.782 | [0.466,1.314] | 0.353 | 0.388 |
| rs1051303  | LTBP4        | G | 0.444 | 0.983 | [0.771,1.253] | 0.888 | 1.240 | [0.782,1.966]  | 0.360 | 1.262 | [0.771,2.064] | 0.354 | 0.636 |
| rs2465811  | PTPRB        | C | 0.307 | 1.092 | [0.846,1.41]  | 0.498 | 0.858 | [0.532,1.384]  | 0.530 | 0.786 | [0.471,1.309] | 0.354 | 0.611 |
| rs4918758  | CYP2C9       | C | 0.341 | 0.937 | [0.732,1.198] | 0.601 | 0.739 | [0.461,1.183]  | 0.207 | 0.789 | [0.477,1.303] | 0.355 | 0.423 |
| rs2909430  | TP53         | G | 0.141 | 0.805 | [0.562,1.152] | 0.235 | 0.562 | [0.277,1.143]  | 0.112 | 0.699 | [0.327,1.493] | 0.355 | 0.168 |
| rs2069718  | IFNG         | T | 0.450 | 1.107 | [0.883,1.388] | 0.379 | 1.360 | [0.906,2.043]  | 0.138 | 1.229 | [0.794,1.902] | 0.355 | 0.265 |
| rs3942589  | SHFM1        | G | 0.084 | 1.004 | [0.649,1.552] | 0.987 | 1.430 | [0.728,2.809]  | 0.299 | 1.425 | [0.673,3.015] | 0.355 | 0.578 |
| rs915907   | CYP2E1       | A | 0.168 | 1.016 | [0.742,1.391] | 0.921 | 1.334 | [0.783,2.273]  | 0.288 | 1.313 | [0.737,2.341] | 0.355 | 0.568 |
| rs3218171  | E2F2         | T | 0.427 | 0.888 | [0.692,1.14]  | 0.352 | 1.125 | [0.703,1.801]  | 0.624 | 1.266 | [0.768,2.089] | 0.355 | 0.532 |
| rs3736599  | SULT1E1      | A | 0.117 | 1.139 | [0.802,1.619] | 0.467 | 0.805 | [0.401,1.615]  | 0.541 | 0.707 | [0.338,1.476] | 0.356 | 0.595 |
| rs1046515  | ADCK2        | T | 0.098 | 1.152 | [0.776,1.71]  | 0.482 | 0.773 | [0.345,1.733]  | 0.532 | 0.671 | [0.287,1.567] | 0.357 | 0.599 |
| rs3824134  | ARHGEF10     | C | 0.234 | 0.966 | [0.729,1.28]  | 0.809 | 1.233 | [0.763,1.993]  | 0.393 | 1.277 | [0.759,2.146] | 0.357 | 0.647 |
| rs2470893  | CYP1A1       | A | 0.259 | 1.186 | [0.909,1.547] | 0.209 | 0.919 | [0.553,1.528]  | 0.746 | 0.775 | [0.451,1.332] | 0.357 | 0.402 |
| rs447804   | BLM          | C | 0.345 | 0.857 | [0.662,1.11]  | 0.242 | 1.084 | [0.682,1.723]  | 0.733 | 1.265 | [0.767,2.087] | 0.357 | 0.445 |
| rs2260863  | EPHX1        | G | 0.301 | 1.047 | [0.811,1.352] | 0.725 | 1.311 | [0.841,2.043]  | 0.232 | 1.252 | [0.776,2.022] | 0.358 | 0.481 |
| rs10079641 | MSH3         | G | 0.079 | 0.708 | [0.44,1.137]  | 0.153 | 1.042 | [0.498,2.178]  | 0.913 | 1.472 | [0.646,3.356] | 0.358 | 0.345 |
| rs1800875  | CMA1         | A | 0.462 | 1.090 | [0.861,1.381] | 0.473 | 0.879 | [0.573,1.348]  | 0.554 | 0.806 | [0.509,1.276] | 0.358 | 0.607 |
| rs2216504  | ABCB11       | A | 0.052 | 1.306 | [0.774,2.203] | 0.318 | 0.765 | [0.259,2.264]  | 0.629 | 0.586 | [0.187,1.833] | 0.358 | 0.500 |
| rs10017297 | Intergenic   | T | 0.055 | 1.191 | [0.648,2.188] | 0.573 | 1.872 | [0.798,4.39]   | 0.150 | 1.571 | [0.599,4.124] | 0.359 | 0.334 |
| rs2229765  | IGF1R        | A | 0.392 | 1.174 | [0.925,1.489] | 0.187 | 0.944 | [0.61,1.46]    | 0.794 | 0.804 | [0.504,1.282] | 0.359 | 0.378 |
| rs10898    | LOC100129773 | C | 0.277 | 1.027 | [0.787,1.34]  | 0.845 | 1.296 | [0.815,2.061]  | 0.273 | 1.262 | [0.767,2.078] | 0.359 | 0.547 |
| rs3135506  | APOA5        | C | 0.065 | 0.802 | [0.493,1.305] | 0.375 | 1.205 | [0.546,2.66]   | 0.644 | 1.502 | [0.629,3.585] | 0.359 | 0.567 |
| rs1801244  | ATP7B        | C | 0.446 | 0.747 | [0.579,0.963] | 0.025 | 0.949 | [0.588,1.533]  | 0.831 | 1.271 | [0.761,2.122] | 0.359 | 0.080 |
| rs11572081 | CYP2C8       | A | 0.031 | 1.370 | [0.589,3.186] | 0.465 | 0.657 | [0.155,2.791]  | 0.569 | 0.479 | [0.1,2.309]   | 0.359 | 0.609 |
| rs537183   | ABCB11       | G | 0.275 | 1.092 | [0.848,1.406] | 0.495 | 1.366 | [0.874,2.135]  | 0.171 | 1.251 | [0.775,2.02]  | 0.360 | 0.349 |
| rs8064946  | TP53         | C | 0.240 | 1.218 | [0.878,1.69]  | 0.238 | 0.902 | [0.494,1.647]  | 0.736 | 0.740 | [0.388,1.413] | 0.362 | 0.440 |
| rs7668282  | UGT2B7       | C | 0.020 | 2.219 | [1.036,4.756] | 0.040 | 3.658 | [1.319,10.144] | 0.013 | 1.648 | [0.563,4.826] | 0.362 | 0.018 |
| rs2369679  | AK7          | C | 0.149 | 1.166 | [0.838,1.622] | 0.362 | 1.540 | [0.882,2.688]  | 0.129 | 1.320 | [0.726,2.402] | 0.362 | 0.253 |
| rs4148553  | ABCC4        | A | 0.432 | 0.850 | [0.671,1.077] | 0.179 | 1.051 | [0.686,1.612]  | 0.818 | 1.237 | [0.782,1.956] | 0.363 | 0.370 |
| rs6457815  | PPARD        | C | 0.109 | 0.923 | [0.604,1.41]  | 0.710 | 1.303 | [0.661,2.567]  | 0.445 | 1.412 | [0.671,2.97]  | 0.363 | 0.661 |
| rs3092856  | ATM          | T | 0.015 | 1.822 | [0.716,4.638] | 0.208 | 0.659 | [0.081,5.384]  | 0.697 | 0.361 | [0.04,3.245]  | 0.364 | 0.391 |
| rs4938016  | ANKK1        | G | 0.372 | 1.429 | [1.112,1.836] | 0.005 | 1.152 | [0.749,1.772]  | 0.520 | 0.806 | [0.506,1.283] | 0.364 | 0.020 |
| rs1424482  | ALDH1A1      | C | 0.409 | 0.983 | [0.771,1.254] | 0.889 | 1.222 | [0.789,1.894]  | 0.369 | 1.244 | [0.777,1.991] | 0.364 | 0.645 |
| rs2242665  | SLC44A4      | G | 0.446 | 1.085 | [0.857,1.373] | 0.498 | 1.335 | [0.88,2.026]   | 0.174 | 1.231 | [0.786,1.928] | 0.364 | 0.353 |
| rs7665103  | HELQ         | G | 0.438 | 1.013 | [0.798,1.284] | 0.917 | 1.254 | [0.815,1.929]  | 0.303 | 1.238 | [0.78,1.967]  | 0.365 | 0.587 |
| rs1140616  | FASN         | T | 0.460 | 0.961 | [0.744,1.241] | 0.759 | 1.214 | [0.756,1.95]   | 0.422 | 1.264 | [0.761,2.1]   | 0.366 | 0.664 |
| rs11574    | ID3          | A | 0.203 | 0.801 | [0.592,1.083] | 0.149 | 1.046 | [0.612,1.787]  | 0.870 | 1.306 | [0.731,2.332] | 0.367 | 0.331 |
| rs3766934  | EPHX1        | T | 0.091 | 1.026 | [0.689,1.526] | 0.901 | 0.682 | [0.293,1.587]  | 0.375 | 0.665 | [0.275,1.613] | 0.367 | 0.655 |

|            |            |   |       |       |               |       |       |               |       |       |               |       |       |
|------------|------------|---|-------|-------|---------------|-------|-------|---------------|-------|-------|---------------|-------|-------|
| rs6131     | SELP       | A | 0.207 | 0.907 | [0.675,1.22]  | 0.519 | 1.162 | [0.71,1.902]  | 0.551 | 1.281 | [0.748,2.193] | 0.367 | 0.638 |
| rs6092     | SERPINE1   | A | 0.090 | 0.775 | [0.507,1.186] | 0.241 | 0.489 | [0.189,1.269] | 0.142 | 0.631 | [0.232,1.717] | 0.367 | 0.202 |
| rs1967120  | ABCC1      | C | 0.333 | 1.217 | [0.955,1.549] | 0.112 | 1.498 | [0.981,2.288] | 0.061 | 1.232 | [0.783,1.938] | 0.367 | 0.074 |
| rs4905475  | BDKRB1     | C | 0.086 | 0.954 | [0.626,1.452] | 0.825 | 0.607 | [0.238,1.55]  | 0.297 | 0.637 | [0.238,1.701] | 0.368 | 0.577 |
| rs17021877 | IKBKE      | A | 0.019 | 0.915 | [0.372,2.249] | 0.847 | 0.335 | [0.041,2.723] | 0.307 | 0.366 | [0.041,3.256] | 0.368 | 0.591 |
| rs1049631  | IL4R       | A | 0.476 | 0.930 | [0.731,1.182] | 0.551 | 1.152 | [0.746,1.78]  | 0.524 | 1.239 | [0.777,1.977] | 0.368 | 0.643 |
| rs2104772  | TNC        | T | 0.461 | 0.993 | [0.788,1.25]  | 0.949 | 0.807 | [0.53,1.23]   | 0.319 | 0.813 | [0.518,1.277] | 0.369 | 0.607 |
| rs35594    | ABCC1      | A | 0.348 | 0.929 | [0.717,1.204] | 0.579 | 1.163 | [0.739,1.831] | 0.514 | 1.251 | [0.767,2.043] | 0.370 | 0.654 |
| rs2239995  | ABCC1      | A | 0.172 | 1.269 | [0.938,1.718] | 0.123 | 0.953 | [0.527,1.723] | 0.874 | 0.751 | [0.402,1.404] | 0.370 | 0.283 |
| rs1042858  | RRM1       | G | 0.092 | 1.463 | [1.013,2.112] | 0.042 | 1.051 | [0.528,2.093] | 0.887 | 0.718 | [0.349,1.48]  | 0.370 | 0.124 |
| rs1062033  | CYP19A1    | C | 0.403 | 0.931 | [0.73,1.187]  | 0.564 | 1.150 | [0.748,1.767] | 0.524 | 1.235 | [0.778,1.96]  | 0.370 | 0.649 |
| rs1557044  | CYP2C9     | C | 0.172 | 1.105 | [0.81,1.508]  | 0.528 | 0.830 | [0.46,1.497]  | 0.536 | 0.751 | [0.401,1.407] | 0.371 | 0.636 |
| rs2043449  | CYP20A1    | G | 0.074 | 1.325 | [0.824,2.131] | 0.246 | 0.855 | [0.347,2.108] | 0.734 | 0.645 | [0.247,1.686] | 0.372 | 0.449 |
| rs2228309  | FASN       | T | 0.458 | 1.019 | [0.799,1.299] | 0.882 | 1.262 | [0.815,1.955] | 0.297 | 1.239 | [0.774,1.982] | 0.372 | 0.581 |
| rs2071214  | BIRC5      | G | 0.043 | 0.764 | [0.413,1.413] | 0.390 | 1.253 | [0.47,3.342]  | 0.652 | 1.641 | [0.552,4.877] | 0.372 | 0.589 |
| rs3748415  | APCDD1     | T | 0.101 | 0.972 | [0.659,1.432] | 0.885 | 1.331 | [0.707,2.506] | 0.376 | 1.370 | [0.686,2.734] | 0.373 | 0.650 |
| rs1805327  | RAD1       | G | 0.065 | 1.286 | [0.813,2.032] | 0.282 | 1.867 | [0.869,4.013] | 0.110 | 1.453 | [0.639,3.304] | 0.373 | 0.199 |
| rs769412   | MDM2       | G | 0.065 | 1.438 | [0.909,2.272] | 0.120 | 0.912 | [0.352,2.366] | 0.850 | 0.635 | [0.233,1.727] | 0.373 | 0.276 |
| rs10018260 | Intergenic | T | 0.210 | 0.943 | [0.692,1.284] | 0.709 | 1.217 | [0.726,2.039] | 0.456 | 1.291 | [0.736,2.265] | 0.373 | 0.673 |
| rs1801132  | ESR1       | G | 0.214 | 0.965 | [0.725,1.285] | 0.809 | 0.738 | [0.422,1.289] | 0.286 | 0.764 | [0.423,1.382] | 0.374 | 0.563 |
| rs854548   | PPP1R9A    | A | 0.284 | 1.042 | [0.81,1.341]  | 0.750 | 0.825 | [0.509,1.338] | 0.436 | 0.792 | [0.474,1.325] | 0.374 | 0.674 |
| rs439132   | LIG1       | G | 0.048 | 0.946 | [0.499,1.794] | 0.865 | 1.495 | [0.613,3.643] | 0.377 | 1.580 | [0.574,4.346] | 0.376 | 0.644 |
| rs16118    | NPY        | C | 0.409 | 1.149 | [0.903,1.463] | 0.259 | 1.417 | [0.92,2.182]  | 0.114 | 1.233 | [0.776,1.96]  | 0.376 | 0.190 |
| rs7847     | CHST11     | C | 0.296 | 1.333 | [1.035,1.717] | 0.026 | 1.065 | [0.668,1.699] | 0.790 | 0.799 | [0.487,1.313] | 0.376 | 0.084 |
| rs8192719  | CYP2B6     | T | 0.287 | 1.020 | [0.779,1.337] | 0.883 | 1.277 | [0.808,2.019] | 0.295 | 1.251 | [0.761,2.057] | 0.377 | 0.579 |
| rs348475   | ALDH1A1    | G | 0.450 | 0.891 | [0.706,1.125] | 0.332 | 0.723 | [0.468,1.116] | 0.143 | 0.811 | [0.51,1.291]  | 0.377 | 0.253 |
| rs1805129  | CHEK2      | G | 0.037 | 1.179 | [0.642,2.165] | 0.596 | 0.641 | [0.176,2.338] | 0.501 | 0.544 | [0.14,2.106]  | 0.378 | 0.655 |
| rs3791981  | APOB       | G | 0.156 | 1.085 | [0.769,1.531] | 0.643 | 0.798 | [0.421,1.512] | 0.489 | 0.736 | [0.372,1.456] | 0.378 | 0.671 |
| rs10018786 | POLN       | G | 0.212 | 0.815 | [0.591,1.124] | 0.212 | 1.064 | [0.617,1.835] | 0.823 | 1.306 | [0.721,2.364] | 0.378 | 0.424 |
| rs6457813  | PPARD      | T | 0.059 | 0.731 | [0.403,1.325] | 0.301 | 1.151 | [0.465,2.847] | 0.761 | 1.574 | [0.573,4.323] | 0.378 | 0.528 |
| rs419833   | GSTA4      | C | 0.495 | 0.929 | [0.731,1.18]  | 0.545 | 0.755 | [0.491,1.159] | 0.199 | 0.813 | [0.512,1.29]  | 0.379 | 0.398 |
| rs3731680  | SULT1C2    | C | 0.058 | 0.819 | [0.493,1.36]  | 0.440 | 0.468 | [0.142,1.538] | 0.211 | 0.572 | [0.165,1.987] | 0.379 | 0.370 |
| rs1501299  | ADIPOQ     | A | 0.282 | 0.934 | [0.713,1.221] | 0.616 | 0.730 | [0.436,1.221] | 0.230 | 0.782 | [0.451,1.354] | 0.380 | 0.457 |
| rs701106   | SCARB1     | A | 0.182 | 1.082 | [0.79,1.481]  | 0.624 | 1.397 | [0.827,2.361] | 0.212 | 1.292 | [0.729,2.287] | 0.380 | 0.437 |
| rs7586110  | UGT1A10    | G | 0.349 | 1.018 | [0.796,1.301] | 0.889 | 1.257 | [0.809,1.951] | 0.309 | 1.235 | [0.77,1.98]   | 0.381 | 0.596 |
| rs2048426  | PARP1      | T | 0.420 | 1.045 | [0.826,1.324] | 0.712 | 0.851 | [0.554,1.308] | 0.463 | 0.814 | [0.513,1.292] | 0.383 | 0.683 |
| rs973013   | HNMT       | T | 0.234 | 0.712 | [0.532,0.953] | 0.023 | 0.908 | [0.551,1.495] | 0.703 | 1.275 | [0.738,2.202] | 0.383 | 0.074 |
| rs2070959  | UGT1A10    | G | 0.294 | 0.951 | [0.733,1.233] | 0.704 | 1.184 | [0.747,1.877] | 0.473 | 1.245 | [0.759,2.043] | 0.386 | 0.686 |
| rs3917724  | SELP       | T | 0.012 | 1.347 | [0.463,3.916] | 0.585 | 0.477 | [0.051,4.42]  | 0.514 | 0.354 | [0.034,3.702] | 0.386 | 0.662 |
| rs1063856  | VWF        | G | 0.390 | 1.081 | [0.849,1.375] | 0.527 | 1.323 | [0.865,2.025] | 0.197 | 1.224 | [0.774,1.935] | 0.387 | 0.393 |
| rs4148551  | ABCC4      | G | 0.424 | 1.037 | [0.817,1.316] | 0.766 | 0.846 | [0.549,1.303] | 0.448 | 0.816 | [0.513,1.297] | 0.389 | 0.690 |

|            |            |   |       |       |               |       |       |               |       |       |               |       |       |
|------------|------------|---|-------|-------|---------------|-------|-------|---------------|-------|-------|---------------|-------|-------|
| rs13436    | LIG1       | C | 0.438 | 0.896 | [0.696,1.153] | 0.394 | 1.097 | [0.719,1.673] | 0.668 | 1.224 | [0.772,1.941] | 0.389 | 0.597 |
| rs527221   | DMPK       | C | 0.114 | 0.895 | [0.613,1.306] | 0.564 | 1.222 | [0.634,2.357] | 0.549 | 1.366 | [0.671,2.782] | 0.390 | 0.670 |
| rs348463   | ALDH1A1    | C | 0.287 | 1.013 | [0.78,1.316]  | 0.923 | 1.261 | [0.794,2.001] | 0.326 | 1.244 | [0.756,2.048] | 0.390 | 0.617 |
| rs854556   | PON1       | T | 0.302 | 0.947 | [0.732,1.225] | 0.681 | 0.752 | [0.458,1.234] | 0.260 | 0.794 | [0.469,1.345] | 0.391 | 0.512 |
| rs7904678  | ABCC2      | T | 0.055 | 0.837 | [0.484,1.448] | 0.525 | 1.253 | [0.552,2.846] | 0.589 | 1.497 | [0.595,3.767] | 0.392 | 0.670 |
| rs8187694  |            | A | 0.054 | 0.856 | [0.494,1.481] | 0.577 | 1.280 | [0.563,2.908] | 0.555 | 1.496 | [0.595,3.763] | 0.392 | 0.683 |
| rs2070677  | CYP2E1     | T | 0.209 | 0.866 | [0.616,1.217] | 0.407 | 0.640 | [0.335,1.224] | 0.177 | 0.739 | [0.37,1.477]  | 0.392 | 0.323 |
| rs2288550  | IMPDH1     | C | 0.160 | 0.870 | [0.632,1.199] | 0.396 | 1.130 | [0.65,1.964]  | 0.664 | 1.298 | [0.713,2.364] | 0.393 | 0.597 |
| rs436525   | ADAMTS1    | G | 0.336 | 0.915 | [0.722,1.16]  | 0.462 | 1.114 | [0.733,1.695] | 0.613 | 1.218 | [0.775,1.913] | 0.393 | 0.633 |
| rs2706375  | RAD50      | C | 0.017 | 1.015 | [0.339,3.037] | 0.979 | 0.371 | [0.043,3.198] | 0.367 | 0.366 | [0.036,3.69]  | 0.394 | 0.661 |
| rs9640663  | PTPN12     | G | 0.350 | 1.111 | [0.876,1.409] | 0.385 | 0.899 | [0.568,1.422] | 0.648 | 0.809 | [0.497,1.317] | 0.394 | 0.580 |
| rs1629816  | SEC13L1    | A | 0.424 | 0.905 | [0.716,1.144] | 0.405 | 1.100 | [0.726,1.666] | 0.654 | 1.215 | [0.776,1.901] | 0.395 | 0.602 |
| rs520354   | APOB       | G | 0.440 | 0.957 | [0.748,1.223] | 0.723 | 1.178 | [0.754,1.839] | 0.472 | 1.231 | [0.763,1.988] | 0.395 | 0.696 |
| rs2307424  | NR1I3      | T | 0.305 | 0.816 | [0.629,1.059] | 0.126 | 1.015 | [0.637,1.618] | 0.949 | 1.244 | [0.752,2.059] | 0.395 | 0.300 |
| rs1537514  | C1orf167   | G | 0.103 | 0.852 | [0.578,1.255] | 0.417 | 0.580 | [0.251,1.34]  | 0.202 | 0.681 | [0.281,1.651] | 0.395 | 0.351 |
| rs11550540 | TP53RK     | G | 0.073 | 1.001 | [0.644,1.556] | 0.996 | 1.406 | [0.686,2.883] | 0.352 | 1.404 | [0.641,3.075] | 0.396 | 0.642 |
| rs3774306  | BCL6       | G | 0.445 | 1.249 | [0.987,1.58]  | 0.064 | 1.023 | [0.665,1.574] | 0.916 | 0.819 | [0.517,1.298] | 0.396 | 0.177 |
| rs1059751  | ABCC4      | C | 0.433 | 0.846 | [0.667,1.071] | 0.164 | 1.031 | [0.673,1.579] | 0.889 | 1.219 | [0.771,1.927] | 0.396 | 0.359 |
| rs207943   | XRCC5      | G | 0.463 | 1.265 | [1.004,1.594] | 0.046 | 1.043 | [0.688,1.581] | 0.844 | 0.824 | [0.527,1.289] | 0.397 | 0.136 |
| rs4148733  | ABCB1      | C | 0.163 | 1.125 | [0.806,1.569] | 0.488 | 1.446 | [0.85,2.462]  | 0.174 | 1.286 | [0.719,2.299] | 0.397 | 0.353 |
| rs11582663 | FCRL4      | T | 0.122 | 0.819 | [0.567,1.182] | 0.286 | 0.579 | [0.271,1.236] | 0.158 | 0.707 | [0.317,1.578] | 0.398 | 0.245 |
| rs1863703  | STK36      | G | 0.099 | 1.269 | [0.854,1.884] | 0.238 | 0.891 | [0.412,1.926] | 0.769 | 0.702 | [0.309,1.595] | 0.398 | 0.451 |
| rs2685803  | ABCB11     | A | 0.482 | 1.134 | [0.901,1.427] | 0.283 | 0.931 | [0.606,1.429] | 0.743 | 0.821 | [0.519,1.298] | 0.398 | 0.502 |
| rs2305948  | KDR        | T | 0.131 | 0.934 | [0.644,1.354] | 0.720 | 1.255 | [0.668,2.356] | 0.480 | 1.343 | [0.677,2.666] | 0.399 | 0.701 |
| rs1131620  | LTBP4      | G | 0.447 | 0.967 | [0.766,1.221] | 0.778 | 1.174 | [0.771,1.788] | 0.455 | 1.214 | [0.773,1.907] | 0.400 | 0.701 |
| rs2664538  | MMP9       | G | 0.363 | 0.996 | [0.781,1.272] | 0.977 | 0.807 | [0.51,1.277]  | 0.360 | 0.810 | [0.496,1.322] | 0.400 | 0.655 |
| rs11569913 | TNFRSF8    | G | 0.064 | 1.072 | [0.633,1.815] | 0.795 | 0.662 | [0.23,1.906]  | 0.444 | 0.617 | [0.2,1.9]     | 0.400 | 0.701 |
| rs6068816  | CYP24A1    | T | 0.113 | 0.905 | [0.631,1.297] | 0.586 | 0.635 | [0.291,1.39]  | 0.256 | 0.702 | [0.309,1.599] | 0.400 | 0.481 |
| rs948516   | PGR        | G | 0.263 | 1.229 | [0.939,1.609] | 0.133 | 0.982 | [0.6,1.607]   | 0.941 | 0.799 | [0.472,1.351] | 0.402 | 0.310 |
| rs4633     | COMT       | T | 0.478 | 1.134 | [0.898,1.432] | 0.291 | 0.928 | [0.599,1.438] | 0.738 | 0.818 | [0.512,1.308] | 0.402 | 0.511 |
| rs5370     | EDN1       | T | 0.231 | 1.108 | [0.843,1.456] | 0.462 | 0.874 | [0.52,1.472]  | 0.614 | 0.789 | [0.454,1.373] | 0.402 | 0.633 |
| rs228589   | ATM        | T | 0.463 | 0.960 | [0.754,1.222] | 0.741 | 0.788 | [0.513,1.21]  | 0.277 | 0.821 | [0.517,1.303] | 0.403 | 0.545 |
| rs10018064 | Intergenic | C | 0.401 | 0.871 | [0.685,1.108] | 0.260 | 1.060 | [0.691,1.625] | 0.789 | 1.217 | [0.768,1.929] | 0.403 | 0.484 |
| rs2227552  | C10orf55   | C | 0.280 | 1.209 | [0.928,1.574] | 0.160 | 0.970 | [0.598,1.572] | 0.901 | 0.802 | [0.479,1.344] | 0.403 | 0.353 |
| rs3850751  | NAT1       | C | 0.382 | 1.033 | [0.809,1.319] | 0.794 | 1.267 | [0.81,1.981]  | 0.299 | 1.226 | [0.76,1.979]  | 0.403 | 0.579 |
| rs1805355  | MSH3       | A | 0.108 | 1.340 | [0.936,1.917] | 0.110 | 0.991 | [0.507,1.941] | 0.980 | 0.740 | [0.365,1.501] | 0.404 | 0.266 |
| rs3093816  | CCNH       | C | 0.382 | 1.050 | [0.826,1.335] | 0.692 | 1.277 | [0.831,1.961] | 0.264 | 1.216 | [0.767,1.929] | 0.405 | 0.521 |
| rs903247   | CHST11     | C | 0.375 | 1.386 | [1.092,1.759] | 0.007 | 1.139 | [0.739,1.758] | 0.555 | 0.822 | [0.518,1.305] | 0.406 | 0.027 |
| rs1926201  | FAS        | C | 0.495 | 1.034 | [0.815,1.312] | 0.781 | 0.848 | [0.547,1.315] | 0.461 | 0.820 | [0.513,1.31]  | 0.406 | 0.708 |
| rs2522390  | RAD50      | C | 0.017 | 1.014 | [0.339,3.034] | 0.981 | 0.381 | [0.044,3.278] | 0.380 | 0.376 | [0.037,3.788] | 0.407 | 0.675 |
| rs2580874  | AICDA      | G | 0.492 | 1.010 | [0.797,1.28]  | 0.933 | 0.830 | [0.539,1.278] | 0.398 | 0.822 | [0.517,1.306] | 0.407 | 0.686 |

|            |         |   |       |       |               |       |       |               |       |       |               |       |       |
|------------|---------|---|-------|-------|---------------|-------|-------|---------------|-------|-------|---------------|-------|-------|
| rs17012739 | PLK4    | G | 0.299 | 1.014 | [0.789,1.302] | 0.914 | 1.240 | [0.797,1.928] | 0.340 | 1.223 | [0.76,1.967]  | 0.407 | 0.635 |
| rs1051992  | PRKCDBP | T | 0.486 | 0.936 | [0.738,1.186] | 0.582 | 0.768 | [0.496,1.188] | 0.235 | 0.821 | [0.514,1.31]  | 0.407 | 0.457 |
| rs1208     | NAT2    | G | 0.399 | 1.071 | [0.848,1.353] | 0.565 | 0.882 | [0.573,1.357] | 0.567 | 0.823 | [0.519,1.305] | 0.408 | 0.682 |
| rs884716   | SHFM1   | A | 0.269 | 1.055 | [0.818,1.362] | 0.679 | 1.288 | [0.831,1.997] | 0.257 | 1.221 | [0.761,1.957] | 0.408 | 0.511 |
| rs632478   | MMP3    | A | 0.487 | 0.925 | [0.732,1.169] | 0.513 | 1.116 | [0.739,1.687] | 0.602 | 1.207 | [0.773,1.884] | 0.408 | 0.667 |
| rs1467558  | CD44    | A | 0.151 | 0.717 | [0.508,1.013] | 0.059 | 0.939 | [0.523,1.684] | 0.833 | 1.309 | [0.691,2.479] | 0.408 | 0.168 |
| rs6744284  | UGT1A10 | T | 0.338 | 1.007 | [0.771,1.316] | 0.958 | 1.242 | [0.784,1.969] | 0.356 | 1.234 | [0.75,2.03]   | 0.409 | 0.650 |
| rs398700   | RUNDC2A | G | 0.220 | 1.162 | [0.864,1.564] | 0.321 | 0.911 | [0.531,1.565] | 0.737 | 0.784 | [0.44,1.397]  | 0.409 | 0.543 |
| rs1514499  | DPYD    | C | 0.020 | 1.329 | [0.589,3]     | 0.494 | 0.548 | [0.072,4.175] | 0.562 | 0.413 | [0.05,3.385]  | 0.410 | 0.638 |
| rs2214827  | HGF     | G | 0.191 | 1.042 | [0.778,1.395] | 0.781 | 1.315 | [0.786,2.2]   | 0.297 | 1.262 | [0.726,2.194] | 0.410 | 0.575 |
| rs2857713  | LTA     | G | 0.268 | 1.178 | [0.898,1.546] | 0.237 | 1.458 | [0.91,2.336]  | 0.117 | 1.237 | [0.746,2.053] | 0.410 | 0.186 |
| rs1051741  | EPHX1   | T | 0.104 | 1.076 | [0.734,1.576] | 0.709 | 0.762 | [0.351,1.655] | 0.493 | 0.709 | [0.312,1.609] | 0.410 | 0.710 |
| rs2165810  | MBL2    | A | 0.274 | 1.090 | [0.836,1.42]  | 0.524 | 0.874 | [0.534,1.429] | 0.591 | 0.802 | [0.473,1.359] | 0.411 | 0.671 |
| rs557462   | ABCB11  | G | 0.263 | 1.086 | [0.84,1.404]  | 0.528 | 1.333 | [0.845,2.103] | 0.216 | 1.228 | [0.753,2.002] | 0.411 | 0.420 |
| rs3795837  | ATF3    | C | 0.136 | 0.958 | [0.68,1.352]  | 0.809 | 0.703 | [0.35,1.413]  | 0.323 | 0.734 | [0.35,1.537]  | 0.412 | 0.609 |
| rs6196     | NR3C1   | G | 0.151 | 0.844 | [0.606,1.174] | 0.314 | 0.625 | [0.317,1.232] | 0.174 | 0.740 | [0.36,1.522]  | 0.413 | 0.275 |
| rs2242046  | SLC28A1 | T | 0.412 | 0.854 | [0.668,1.091] | 0.206 | 1.042 | [0.667,1.627] | 0.857 | 1.221 | [0.757,1.968] | 0.414 | 0.421 |
| rs10017301 | ZNF827  | T | 0.087 | 1.102 | [0.708,1.714] | 0.668 | 0.783 | [0.367,1.671] | 0.527 | 0.711 | [0.313,1.614] | 0.414 | 0.712 |
| rs3842     | ABCB1   | G | 0.140 | 1.019 | [0.73,1.421]  | 0.913 | 1.304 | [0.755,2.252] | 0.341 | 1.280 | [0.707,2.317] | 0.415 | 0.635 |
| rs1799930  | NAT2    | A | 0.293 | 0.851 | [0.654,1.106] | 0.227 | 0.682 | [0.416,1.12]  | 0.130 | 0.802 | [0.472,1.362] | 0.415 | 0.190 |
| rs9282574  | ABCG8   | A | 0.038 | 1.068 | [0.532,2.145] | 0.854 | 0.550 | [0.121,2.509] | 0.440 | 0.515 | [0.104,2.546] | 0.416 | 0.716 |
| rs4655537  | LEPR    | A | 0.361 | 0.927 | [0.725,1.186] | 0.546 | 0.758 | [0.481,1.193] | 0.231 | 0.817 | [0.503,1.329] | 0.416 | 0.442 |
| rs7190307  | NFATC3  | G | 0.467 | 1.053 | [0.828,1.337] | 0.675 | 0.867 | [0.561,1.341] | 0.522 | 0.824 | [0.516,1.315] | 0.417 | 0.714 |
| rs11229545 | ZFP91   | G | 0.224 | 1.079 | [0.814,1.43]  | 0.596 | 0.852 | [0.499,1.455] | 0.558 | 0.790 | [0.446,1.397] | 0.417 | 0.698 |
| rs2518144  | AICDA   | G | 0.483 | 1.002 | [0.791,1.271] | 0.985 | 0.829 | [0.541,1.272] | 0.391 | 0.827 | [0.523,1.31]  | 0.418 | 0.685 |
| rs163077   | FAM82A  | A | 0.246 | 1.095 | [0.838,1.429] | 0.506 | 0.869 | [0.513,1.473] | 0.602 | 0.794 | [0.453,1.39]  | 0.419 | 0.665 |
| rs6941     | XRCC5   | A | 0.112 | 0.998 | [0.687,1.451] | 0.994 | 0.717 | [0.336,1.531] | 0.391 | 0.718 | [0.322,1.602] | 0.419 | 0.688 |
| rs20432    | PTGS2   | G | 0.230 | 1.187 | [0.876,1.61]  | 0.268 | 0.936 | [0.547,1.601] | 0.808 | 0.788 | [0.441,1.407] | 0.420 | 0.500 |
| rs8192879  | CYP7A1  | A | 0.377 | 1.228 | [0.97,1.553]  | 0.088 | 1.017 | [0.663,1.56]  | 0.939 | 0.828 | [0.524,1.31]  | 0.421 | 0.229 |
| rs1131532  | TNFSF10 | T | 0.346 | 0.729 | [0.561,0.947] | 0.018 | 0.893 | [0.567,1.408] | 0.627 | 1.225 | [0.747,2.008] | 0.421 | 0.060 |
| rs2892806  | ABCB11  | T | 0.054 | 1.448 | [0.893,2.349] | 0.134 | 0.953 | [0.36,2.521]  | 0.923 | 0.658 | [0.238,1.823] | 0.421 | 0.308 |
| rs169985   | ABCC1   | G | 0.410 | 1.138 | [0.873,1.484] | 0.339 | 0.914 | [0.553,1.509] | 0.724 | 0.803 | [0.47,1.371]  | 0.421 | 0.563 |
| rs2288648  | FASTK   | A | 0.020 | 1.497 | [0.657,3.411] | 0.337 | 0.623 | [0.079,4.879] | 0.652 | 0.416 | [0.049,3.529] | 0.421 | 0.542 |
| rs3020411  | ESR1    | G | 0.380 | 1.205 | [0.937,1.549] | 0.146 | 0.984 | [0.622,1.559] | 0.947 | 0.817 | [0.499,1.337] | 0.421 | 0.335 |
| rs827528   | FZD6    | G | 0.227 | 0.979 | [0.739,1.295] | 0.880 | 0.773 | [0.45,1.327]  | 0.350 | 0.790 | [0.444,1.405] | 0.422 | 0.646 |
| rs1527463  | CD36    | G | 0.028 | 0.551 | [0.237,1.279] | 0.165 | 1.002 | [0.276,3.635] | 0.998 | 1.818 | [0.423,7.824] | 0.422 | 0.377 |
| rs987539   | PON2    | C | 0.487 | 1.018 | [0.802,1.294] | 0.882 | 1.228 | [0.802,1.88]  | 0.344 | 1.206 | [0.763,1.907] | 0.423 | 0.639 |
| rs3749229  | CHRD    | A | 0.129 | 0.833 | [0.562,1.236] | 0.365 | 1.112 | [0.587,2.105] | 0.745 | 1.334 | [0.659,2.701] | 0.423 | 0.600 |
| rs4762     | AGT     | T | 0.122 | 1.229 | [0.863,1.751] | 0.253 | 0.905 | [0.444,1.841] | 0.782 | 0.736 | [0.348,1.557] | 0.423 | 0.473 |
| rs212079   | ABCC1   | A | 0.050 | 1.402 | [0.831,2.363] | 0.205 | 2.012 | [0.883,4.585] | 0.096 | 1.436 | [0.593,3.477] | 0.423 | 0.158 |
| rs1566439  | NLRC5   | G | 0.377 | 1.179 | [0.923,1.504] | 0.187 | 0.967 | [0.615,1.521] | 0.884 | 0.820 | [0.505,1.332] | 0.423 | 0.396 |

|            |              |   |       |       |               |       |       |               |       |       |               |       |       |
|------------|--------------|---|-------|-------|---------------|-------|-------|---------------|-------|-------|---------------|-------|-------|
| rs1803965  | MGMT         | T | 0.141 | 1.135 | [0.801,1.61]  | 0.477 | 0.852 | [0.441,1.648] | 0.634 | 0.751 | [0.372,1.515] | 0.423 | 0.656 |
| rs246218   | ABCC1        | T | 0.145 | 0.891 | [0.645,1.231] | 0.485 | 0.670 | [0.345,1.3]   | 0.236 | 0.751 | [0.373,1.514] | 0.424 | 0.425 |
| rs279942   | SLC10A2      | G | 0.234 | 1.014 | [0.774,1.328] | 0.920 | 0.812 | [0.487,1.353] | 0.424 | 0.801 | [0.464,1.381] | 0.424 | 0.711 |
| rs11539762 | MYEOV        | A | 0.105 | 0.916 | [0.617,1.358] | 0.661 | 1.216 | [0.644,2.295] | 0.546 | 1.328 | [0.661,2.669] | 0.425 | 0.724 |
| rs3811740  | PLK4         | A | 0.299 | 1.017 | [0.791,1.306] | 0.897 | 1.234 | [0.793,1.92]  | 0.352 | 1.214 | [0.754,1.954] | 0.426 | 0.648 |
| rs13712    | MLH3         | A | 0.478 | 0.952 | [0.748,1.21]  | 0.686 | 0.788 | [0.511,1.213] | 0.279 | 0.828 | [0.52,1.318]  | 0.426 | 0.538 |
| rs7658300  | TXK          | T | 0.318 | 1.012 | [0.771,1.326] | 0.934 | 1.243 | [0.778,1.987] | 0.363 | 1.229 | [0.74,2.042]  | 0.426 | 0.660 |
| rs689453   | NQO1         | A | 0.072 | 0.902 | [0.572,1.424] | 0.658 | 1.256 | [0.596,2.648] | 0.548 | 1.393 | [0.616,3.147] | 0.426 | 0.724 |
| rs2157930  | ABCB1        | T | 0.202 | 1.005 | [0.727,1.391] | 0.974 | 0.776 | [0.43,1.403]  | 0.402 | 0.772 | [0.409,1.459] | 0.426 | 0.696 |
| rs3729512  | LIG1         | A | 0.150 | 0.961 | [0.681,1.355] | 0.819 | 0.733 | [0.396,1.356] | 0.323 | 0.763 | [0.392,1.485] | 0.426 | 0.610 |
| rs12917    | MGMT         | T | 0.150 | 1.124 | [0.808,1.564] | 0.486 | 0.859 | [0.46,1.603]  | 0.632 | 0.764 | [0.393,1.485] | 0.427 | 0.663 |
| rs9576175  | CSNK1A1L     | T | 0.498 | 0.929 | [0.734,1.174] | 0.537 | 1.119 | [0.73,1.715]  | 0.607 | 1.205 | [0.761,1.907] | 0.427 | 0.689 |
| rs9286998  | ACBD3        | C | 0.451 | 0.933 | [0.736,1.182] | 0.564 | 0.772 | [0.5,1.193]   | 0.245 | 0.828 | [0.52,1.319]  | 0.427 | 0.466 |
| rs1800591  | MTTP         | T | 0.271 | 0.865 | [0.664,1.126] | 0.281 | 1.055 | [0.671,1.66]  | 0.816 | 1.220 | [0.746,1.995] | 0.428 | 0.519 |
| rs776746   | CYP3A5       | A | 0.182 | 1.301 | [0.911,1.857] | 0.148 | 0.998 | [0.543,1.834] | 0.994 | 0.767 | [0.398,1.479] | 0.429 | 0.342 |
| rs2020865  | FMO2         | G | 0.085 | 1.025 | [0.644,1.63]  | 0.917 | 1.413 | [0.689,2.895] | 0.345 | 1.378 | [0.623,3.052] | 0.429 | 0.640 |
| rs952005   | SHFM1        | T | 0.084 | 1.036 | [0.673,1.594] | 0.872 | 1.400 | [0.713,2.752] | 0.329 | 1.352 | [0.64,2.853]  | 0.429 | 0.620 |
| rs1417938  | CRP          | A | 0.266 | 1.040 | [0.794,1.363] | 0.774 | 1.277 | [0.797,2.047] | 0.310 | 1.227 | [0.738,2.04]  | 0.429 | 0.591 |
| rs914358   | AKAP2        | G | 0.478 | 1.152 | [0.913,1.453] | 0.234 | 0.961 | [0.632,1.461] | 0.852 | 0.834 | [0.532,1.308] | 0.430 | 0.462 |
| rs10028494 | UGT2B7       | C | 0.142 | 0.970 | [0.642,1.465] | 0.883 | 1.313 | [0.654,2.636] | 0.444 | 1.354 | [0.637,2.879] | 0.431 | 0.720 |
| rs2233406  | NFKBIA       | T | 0.275 | 0.815 | [0.624,1.066] | 0.136 | 1.003 | [0.624,1.611] | 0.992 | 1.229 | [0.735,2.055] | 0.431 | 0.322 |
| rs1061047  | GPRC5A       | C | 0.236 | 1.166 | [0.889,1.529] | 0.266 | 0.937 | [0.563,1.56]  | 0.804 | 0.804 | [0.467,1.384] | 0.431 | 0.497 |
| rs3743135  | PAK6         | G | 0.112 | 1.084 | [0.735,1.598] | 0.683 | 0.790 | [0.377,1.652] | 0.531 | 0.728 | [0.331,1.603] | 0.431 | 0.728 |
| rs1042194  | CYP2C18      | T | 0.149 | 1.149 | [0.831,1.588] | 0.402 | 0.875 | [0.462,1.657] | 0.682 | 0.762 | [0.387,1.5]   | 0.431 | 0.614 |
| rs8187692  | ABCC2        | T | 0.014 | 0.442 | [0.097,2.014] | 0.291 | 1.025 | [0.201,5.217] | 0.976 | 2.319 | [0.285,18.89] | 0.432 | 0.567 |
| rs9333269  | ITGA8        | C | 0.073 | 1.010 | [0.647,1.577] | 0.964 | 1.390 | [0.667,2.9]   | 0.380 | 1.376 | [0.62,3.056]  | 0.433 | 0.677 |
| rs16913653 | IKBKAP       | T | 0.021 | 1.545 | [0.627,3.808] | 0.345 | 0.790 | [0.168,3.705] | 0.765 | 0.511 | [0.096,2.736] | 0.433 | 0.582 |
| rs3136027  | LIG3         | T | 0.058 | 0.751 | [0.434,1.299] | 0.306 | 1.114 | [0.456,2.724] | 0.813 | 1.484 | [0.553,3.98]  | 0.433 | 0.552 |
| rs3829963  | LOC100131484 | A | 0.176 | 1.168 | [0.85,1.604]  | 0.338 | 0.900 | [0.489,1.659] | 0.736 | 0.771 | [0.402,1.478] | 0.433 | 0.567 |
| rs827423   | ESR1         | T | 0.488 | 0.947 | [0.751,1.194] | 0.646 | 1.133 | [0.746,1.721] | 0.558 | 1.196 | [0.764,1.874] | 0.434 | 0.725 |
| rs188096   | SLC10A2      | A | 0.119 | 1.112 | [0.78,1.585]  | 0.557 | 1.421 | [0.805,2.508] | 0.225 | 1.278 | [0.691,2.363] | 0.434 | 0.446 |
| rs216867   | VWF          | A | 0.141 | 0.902 | [0.636,1.28]  | 0.563 | 0.669 | [0.332,1.349] | 0.261 | 0.742 | [0.351,1.566] | 0.434 | 0.480 |
| rs1294689  | FKBP1A       | C | 0.289 | 0.967 | [0.746,1.252] | 0.797 | 1.175 | [0.745,1.854] | 0.487 | 1.216 | [0.745,1.986] | 0.435 | 0.736 |
| rs5030125  | WT1          | A | 0.018 | 1.402 | [0.554,3.547] | 0.476 | 0.601 | [0.08,4.505]  | 0.620 | 0.429 | [0.051,3.598] | 0.435 | 0.658 |
| rs5745325  | MSH4         | A | 0.279 | 0.728 | [0.556,0.953] | 0.021 | 0.889 | [0.559,1.414] | 0.620 | 1.222 | [0.738,2.022] | 0.436 | 0.068 |
| rs1931072  | DPYD         | A | 0.302 | 1.003 | [0.783,1.285] | 0.983 | 0.825 | [0.523,1.303] | 0.410 | 0.823 | [0.504,1.343] | 0.436 | 0.706 |
| rs3759217  | CDKN1B       | T | 0.112 | 0.817 | [0.556,1.2]   | 0.303 | 1.081 | [0.567,2.062] | 0.812 | 1.324 | [0.652,2.686] | 0.437 | 0.548 |
| rs234706   | CBS          | A | 0.319 | 0.929 | [0.697,1.238] | 0.615 | 0.730 | [0.412,1.293] | 0.281 | 0.786 | [0.428,1.443] | 0.437 | 0.521 |
| rs6003071  | MCAT         | T | 0.443 | 0.900 | [0.707,1.146] | 0.393 | 1.083 | [0.701,1.672] | 0.720 | 1.203 | [0.754,1.917] | 0.438 | 0.617 |
| rs405729   | GSTA4        | A | 0.483 | 1.092 | [0.864,1.381] | 0.461 | 1.309 | [0.856,2.002] | 0.215 | 1.198 | [0.759,1.891] | 0.438 | 0.393 |
| rs3219090  | PARP1        | A | 0.405 | 1.012 | [0.8,1.281]   | 0.922 | 0.843 | [0.548,1.297] | 0.437 | 0.833 | [0.525,1.322] | 0.439 | 0.724 |

|            |          |   |       |       |               |       |       |               |       |       |               |       |       |
|------------|----------|---|-------|-------|---------------|-------|-------|---------------|-------|-------|---------------|-------|-------|
| rs3778893  | STARD3NL | A | 0.217 | 1.006 | [0.755,1.342] | 0.965 | 0.798 | [0.46,1.383]  | 0.421 | 0.793 | [0.44,1.428]  | 0.439 | 0.715 |
| rs1537015  | TNC      | C | 0.383 | 1.210 | [0.95,1.54]   | 0.123 | 1.008 | [0.657,1.548] | 0.969 | 0.834 | [0.526,1.321] | 0.439 | 0.298 |
| rs7895372  | ITGA8    | G | 0.019 | 0.988 | [0.41,2.384]  | 0.979 | 1.623 | [0.561,4.696] | 0.371 | 1.642 | [0.467,5.774] | 0.439 | 0.660 |
| rs3811635  | MERTK    | A | 0.391 | 1.099 | [0.867,1.393] | 0.434 | 1.319 | [0.856,2.033] | 0.209 | 1.200 | [0.755,1.908] | 0.440 | 0.376 |
| rs514658   | TATDN2   | T | 0.258 | 0.942 | [0.718,1.235] | 0.666 | 1.154 | [0.716,1.859] | 0.557 | 1.225 | [0.732,2.049] | 0.440 | 0.736 |
| rs3736265  | PPARGC1A | A | 0.061 | 0.893 | [0.531,1.5]   | 0.668 | 1.284 | [0.553,2.981] | 0.561 | 1.438 | [0.571,3.622] | 0.441 | 0.738 |
| rs710411   | NOTCH1   | G | 0.421 | 0.842 | [0.646,1.098] | 0.204 | 0.673 | [0.393,1.154] | 0.150 | 0.799 | [0.452,1.414] | 0.441 | 0.194 |
| rs316019   | SLC22A2  | T | 0.117 | 0.830 | [0.562,1.225] | 0.348 | 0.608 | [0.29,1.275]  | 0.187 | 0.732 | [0.331,1.619] | 0.441 | 0.309 |
| rs2243248  | IL4      | G | 0.093 | 0.687 | [0.437,1.079] | 0.103 | 0.945 | [0.454,1.967] | 0.881 | 1.377 | [0.61,3.106]  | 0.441 | 0.264 |
| rs1494961  | HELQ     | C | 0.439 | 1.059 | [0.833,1.347] | 0.638 | 0.880 | [0.566,1.369] | 0.570 | 0.830 | [0.517,1.333] | 0.442 | 0.730 |
| rs310831   | E2F7     | T | 0.090 | 0.791 | [0.517,1.211] | 0.281 | 1.085 | [0.516,2.281] | 0.829 | 1.372 | [0.611,3.077] | 0.443 | 0.525 |
| rs993891   | HNMT     | A | 0.276 | 0.788 | [0.592,1.048] | 0.101 | 0.971 | [0.595,1.585] | 0.906 | 1.232 | [0.722,2.103] | 0.443 | 0.260 |
| rs11673726 | UGT1A10  | T | 0.352 | 1.095 | [0.842,1.423] | 0.499 | 1.329 | [0.838,2.107] | 0.227 | 1.214 | [0.739,1.993] | 0.443 | 0.424 |
| rs2016347  | IGF1R    | C | 0.497 | 1.066 | [0.839,1.354] | 0.601 | 1.278 | [0.829,1.971] | 0.267 | 1.199 | [0.753,1.909] | 0.444 | 0.503 |
| rs1805414  | PARP1    | C | 0.405 | 1.008 | [0.797,1.275] | 0.946 | 0.842 | [0.549,1.294] | 0.434 | 0.836 | [0.527,1.324] | 0.445 | 0.725 |
| rs16480    | NPY      | C | 0.237 | 1.153 | [0.892,1.492] | 0.276 | 1.385 | [0.895,2.143] | 0.143 | 1.201 | [0.751,1.92]  | 0.445 | 0.236 |
| rs2228233  | NFATC4   | T | 0.306 | 1.163 | [0.902,1.498] | 0.244 | 0.956 | [0.597,1.531] | 0.852 | 0.822 | [0.498,1.358] | 0.445 | 0.476 |
| rs2256327  | FAM82A   | G | 0.208 | 0.745 | [0.547,1.014] | 0.062 | 0.933 | [0.55,1.583]  | 0.796 | 1.252 | [0.703,2.23]  | 0.445 | 0.174 |
| rs2275565  | MTR      | A | 0.260 | 0.930 | [0.704,1.23]  | 0.612 | 1.141 | [0.704,1.851] | 0.592 | 1.227 | [0.726,2.073] | 0.445 | 0.730 |
| rs747657   | PARP1    | G | 0.406 | 1.007 | [0.796,1.274] | 0.954 | 0.842 | [0.548,1.292] | 0.431 | 0.836 | [0.528,1.324] | 0.445 | 0.723 |
| rs2732497  | PPP3CA   | T | 0.459 | 0.990 | [0.778,1.26]  | 0.937 | 1.188 | [0.77,1.834]  | 0.437 | 1.200 | [0.752,1.915] | 0.445 | 0.726 |
| rs8191842  | IGF2R    | T | 0.010 | 2.277 | [0.76,6.822]  | 0.142 | 0.965 | [0.118,7.89]  | 0.973 | 0.424 | [0.047,3.851] | 0.446 | 0.327 |
| rs4437575  | ABCB1    | G | 0.423 | 1.015 | [0.793,1.298] | 0.908 | 1.210 | [0.798,1.836] | 0.369 | 1.193 | [0.758,1.878] | 0.446 | 0.668 |
| rs683369   | SLC22A1  | G | 0.194 | 0.819 | [0.602,1.115] | 0.205 | 1.030 | [0.596,1.781] | 0.915 | 1.258 | [0.697,2.269] | 0.446 | 0.430 |
| rs1047643  | FDFT1    | C | 0.178 | 1.346 | [0.984,1.841] | 0.063 | 1.679 | [0.99,2.845]  | 0.054 | 1.247 | [0.706,2.203] | 0.447 | 0.046 |
| rs2305801  | CYP4F11  | A | 0.230 | 1.019 | [0.768,1.353] | 0.895 | 1.249 | [0.771,2.022] | 0.366 | 1.225 | [0.726,2.068] | 0.447 | 0.665 |
| rs4426527  | AGXT     | G | 0.166 | 0.635 | [0.453,0.891] | 0.009 | 0.814 | [0.452,1.468] | 0.494 | 1.282 | [0.676,2.432] | 0.447 | 0.030 |
| rs7071882  | MBL2     | T | 0.271 | 1.080 | [0.83,1.407]  | 0.566 | 0.881 | [0.54,1.438]  | 0.613 | 0.816 | [0.483,1.379] | 0.447 | 0.714 |
| rs2214102  | ABCB1    | A | 0.077 | 0.845 | [0.546,1.31]  | 0.452 | 0.574 | [0.223,1.479] | 0.251 | 0.679 | [0.251,1.841] | 0.447 | 0.424 |
| rs2277624  | ABCC3    | A | 0.243 | 1.029 | [0.777,1.362] | 0.841 | 0.830 | [0.494,1.394] | 0.481 | 0.806 | [0.462,1.405] | 0.447 | 0.746 |
| rs476632   | HSP90AB1 | A | 0.313 | 0.958 | [0.743,1.235] | 0.738 | 1.157 | [0.736,1.819] | 0.528 | 1.208 | [0.742,1.967] | 0.447 | 0.749 |
| rs25406    | PCNA     | T | 0.403 | 0.949 | [0.75,1.199]  | 0.659 | 1.125 | [0.748,1.69]  | 0.572 | 1.185 | [0.764,1.839] | 0.448 | 0.741 |
| rs2440     | XRCC5    | T | 0.386 | 0.848 | [0.667,1.079] | 0.180 | 1.016 | [0.659,1.566] | 0.942 | 1.198 | [0.752,1.908] | 0.448 | 0.394 |
| rs4918907  | PDLIM1   | A | 0.346 | 1.121 | [0.874,1.438] | 0.369 | 0.931 | [0.596,1.455] | 0.753 | 0.831 | [0.514,1.342] | 0.448 | 0.605 |
| rs743535   | CYP2E1   | T | 0.115 | 0.914 | [0.634,1.318] | 0.630 | 1.183 | [0.641,2.186] | 0.591 | 1.295 | [0.664,2.525] | 0.449 | 0.738 |
| rs680055   | CYP3A43  | C | 0.098 | 0.792 | [0.515,1.217] | 0.287 | 0.569 | [0.257,1.258] | 0.163 | 0.718 | [0.305,1.692] | 0.449 | 0.251 |
| rs11572103 | CYP2C8   | T | 0.031 | 0.473 | [0.181,1.235] | 0.126 | 0.839 | [0.244,2.881] | 0.780 | 1.776 | [0.402,7.845] | 0.449 | 0.308 |
| rs9282612  | BLM      | G | 0.175 | 0.827 | [0.601,1.14]  | 0.247 | 1.040 | [0.603,1.793] | 0.888 | 1.257 | [0.695,2.272] | 0.449 | 0.488 |
| rs2300703  | SRD5A2   | T | 0.460 | 1.075 | [0.848,1.364] | 0.549 | 1.284 | [0.837,1.97]  | 0.252 | 1.194 | [0.754,1.892] | 0.450 | 0.470 |
| rs741817   | CYP8B1   | T | 0.015 | 1.339 | [0.52,3.446]  | 0.545 | 0.717 | [0.16,3.207]  | 0.664 | 0.536 | [0.106,2.706] | 0.450 | 0.714 |
| rs3212860  | CCND1    | T | 0.025 | 1.674 | [0.723,3.874] | 0.229 | 0.932 | [0.231,3.766] | 0.921 | 0.557 | [0.122,2.546] | 0.450 | 0.466 |

|            |              |   |       |       |               |       |       |                |       |       |                |       |       |
|------------|--------------|---|-------|-------|---------------|-------|-------|----------------|-------|-------|----------------|-------|-------|
| rs1805403  | PARP1        | A | 0.203 | 0.969 | [0.731,1.284] | 0.827 | 0.770 | [0.437,1.354]  | 0.364 | 0.794 | [0.436,1.445]  | 0.450 | 0.658 |
| rs3732379  | CX3CR1       | T | 0.249 | 0.999 | [0.764,1.307] | 0.995 | 1.214 | [0.759,1.942]  | 0.418 | 1.215 | [0.733,2.015]  | 0.450 | 0.715 |
| rs2241230  | SCARF2       | T | 0.100 | 1.021 | [0.66,1.579]  | 0.926 | 1.374 | [0.675,2.797]  | 0.382 | 1.346 | [0.622,2.912]  | 0.451 | 0.681 |
| rs2066457  | PMS1         | C | 0.010 | 0.911 | [0.235,3.525] | 0.892 | 1.925 | [0.363,10.204] | 0.442 | 2.113 | [0.302,14.807] | 0.451 | 0.715 |
| rs2243290  | IL4          | A | 0.207 | 1.309 | [0.999,1.715] | 0.050 | 1.059 | [0.628,1.786]  | 0.830 | 0.809 | [0.465,1.406]  | 0.451 | 0.147 |
| rs2230365  | NFKBIL1      | T | 0.132 | 0.939 | [0.664,1.328] | 0.721 | 1.202 | [0.662,2.184]  | 0.546 | 1.280 | [0.672,2.439]  | 0.452 | 0.752 |
| rs8679     | PARP1        | C | 0.202 | 0.971 | [0.733,1.287] | 0.840 | 0.772 | [0.439,1.359]  | 0.370 | 0.795 | [0.437,1.446]  | 0.452 | 0.666 |
| rs4337089  | SLCO1A2      | T | 0.107 | 0.860 | [0.591,1.252] | 0.432 | 0.626 | [0.285,1.375]  | 0.243 | 0.727 | [0.316,1.671]  | 0.453 | 0.408 |
| rs1381057  | POLQ         | T | 0.312 | 0.905 | [0.704,1.164] | 0.438 | 0.748 | [0.47,1.192]   | 0.222 | 0.827 | [0.502,1.361]  | 0.454 | 0.392 |
| rs4150514  | ERCC3        | G | 0.195 | 0.794 | [0.585,1.077] | 0.138 | 0.991 | [0.579,1.695]  | 0.973 | 1.248 | [0.698,2.232]  | 0.455 | 0.329 |
| rs3212219  | IL12B        | T | 0.253 | 1.038 | [0.79,1.365]  | 0.787 | 0.843 | [0.506,1.405]  | 0.512 | 0.812 | [0.469,1.404]  | 0.455 | 0.757 |
| rs182623   | GSTA4        | A | 0.297 | 0.992 | [0.767,1.283] | 0.954 | 1.190 | [0.766,1.849]  | 0.438 | 1.199 | [0.744,1.934]  | 0.456 | 0.730 |
| rs6041750  | FKBP1A       | C | 0.392 | 0.940 | [0.738,1.198] | 0.618 | 0.785 | [0.504,1.221]  | 0.283 | 0.835 | [0.519,1.342]  | 0.456 | 0.526 |
| rs805657   | SLK          | A | 0.200 | 0.915 | [0.675,1.241] | 0.568 | 1.134 | [0.676,1.902]  | 0.634 | 1.239 | [0.705,2.177]  | 0.456 | 0.727 |
| rs11466155 | NGFR         | T | 0.286 | 1.012 | [0.785,1.306] | 0.925 | 1.221 | [0.77,1.935]   | 0.395 | 1.206 | [0.736,1.975]  | 0.457 | 0.697 |
| rs2274756  | LOC100128028 | A | 0.161 | 1.041 | [0.754,1.437] | 0.807 | 0.807 | [0.43,1.515]   | 0.504 | 0.775 | [0.396,1.516]  | 0.457 | 0.758 |
| rs17162549 | MAP3K6       | G | 0.067 | 0.934 | [0.545,1.599] | 0.803 | 1.312 | [0.589,2.923]  | 0.506 | 1.406 | [0.574,3.444]  | 0.457 | 0.753 |
| rs274548   | SLC22A5      | A | 0.213 | 1.064 | [0.793,1.429] | 0.678 | 1.301 | [0.799,2.12]   | 0.290 | 1.223 | [0.72,2.077]   | 0.457 | 0.553 |
| rs11632706 | CYP1A2       | T | 0.049 | 0.956 | [0.554,1.649] | 0.872 | 1.345 | [0.596,3.036]  | 0.475 | 1.407 | [0.571,3.467]  | 0.458 | 0.744 |
| rs2227973  | RAG1         | G | 0.116 | 1.301 | [0.938,1.803] | 0.115 | 1.006 | [0.528,1.919]  | 0.985 | 0.774 | [0.393,1.523]  | 0.458 | 0.281 |
| rs3093873  | LOC100132444 | T | 0.154 | 0.875 | [0.586,1.306] | 0.513 | 0.651 | [0.315,1.343]  | 0.245 | 0.744 | [0.34,1.626]   | 0.458 | 0.447 |
| rs1555025  | ID3          | T | 0.436 | 1.045 | [0.816,1.339] | 0.726 | 1.255 | [0.799,1.97]   | 0.325 | 1.200 | [0.74,1.946]   | 0.459 | 0.602 |
| rs6808205  | PLS1         | A | 0.378 | 1.056 | [0.831,1.342] | 0.656 | 0.883 | [0.567,1.375]  | 0.583 | 0.836 | [0.521,1.343]  | 0.460 | 0.749 |
| rs2082382  | ADRB2        | G | 0.352 | 1.048 | [0.816,1.345] | 0.715 | 1.257 | [0.801,1.974]  | 0.320 | 1.200 | [0.739,1.947]  | 0.461 | 0.595 |
| rs3181217  | IL12B        | A | 0.247 | 0.996 | [0.762,1.303] | 0.978 | 0.812 | [0.488,1.35]   | 0.422 | 0.815 | [0.473,1.404]  | 0.461 | 0.722 |
| rs3093664  | TNF          | G | 0.077 | 1.312 | [0.856,2.012] | 0.212 | 1.733 | [0.873,3.439]  | 0.116 | 1.320 | [0.63,2.764]   | 0.461 | 0.180 |
| rs1822825  | PPARG        | C | 0.419 | 1.131 | [0.891,1.436] | 0.313 | 0.948 | [0.611,1.471]  | 0.813 | 0.838 | [0.524,1.34]   | 0.462 | 0.558 |
| rs2270628  | IGFBP3       | T | 0.235 | 1.012 | [0.766,1.337] | 0.931 | 0.821 | [0.488,1.383]  | 0.459 | 0.811 | [0.465,1.416]  | 0.462 | 0.747 |
| rs1966265  | FGFR4        | A | 0.203 | 0.994 | [0.74,1.335]  | 0.969 | 1.229 | [0.727,2.078]  | 0.441 | 1.236 | [0.702,2.177]  | 0.462 | 0.735 |
| rs1050909  | FBXO25       | T | 0.329 | 1.004 | [0.783,1.286] | 0.978 | 0.834 | [0.527,1.322]  | 0.441 | 0.831 | [0.508,1.361]  | 0.463 | 0.736 |
| rs3448     | GPX1         | T | 0.254 | 1.025 | [0.786,1.336] | 0.856 | 0.835 | [0.5,1.395]    | 0.491 | 0.815 | [0.472,1.407]  | 0.463 | 0.760 |
| rs1801198  | TCN2         | G | 0.399 | 0.902 | [0.708,1.148] | 0.401 | 0.751 | [0.475,1.187]  | 0.220 | 0.833 | [0.51,1.358]   | 0.463 | 0.373 |
| rs2107538  | CCL5         | T | 0.220 | 1.057 | [0.791,1.413] | 0.706 | 0.848 | [0.489,1.471]  | 0.558 | 0.802 | [0.446,1.444]  | 0.463 | 0.759 |
| rs2229531  | ACP5         | A | 0.094 | 1.007 | [0.672,1.508] | 0.975 | 0.727 | [0.32,1.652]   | 0.447 | 0.722 | [0.303,1.724]  | 0.464 | 0.743 |
| rs10916    | CYP1B1       | G | 0.227 | 1.427 | [1.091,1.867] | 0.009 | 1.175 | [0.722,1.914]  | 0.516 | 0.823 | [0.489,1.386]  | 0.464 | 0.033 |
| rs3742424  | PPP2R5C      | C | 0.113 | 1.276 | [0.893,1.824] | 0.181 | 0.984 | [0.51,1.897]   | 0.961 | 0.771 | [0.384,1.549]  | 0.465 | 0.396 |
| rs769243   | CCNA2        | A | 0.084 | 0.774 | [0.461,1.3]   | 0.333 | 1.073 | [0.49,2.351]   | 0.860 | 1.387 | [0.577,3.334]  | 0.465 | 0.595 |
| rs2228262  | THBS1        | G | 0.098 | 1.155 | [0.783,1.704] | 0.467 | 1.499 | [0.781,2.875]  | 0.223 | 1.297 | [0.644,2.614]  | 0.466 | 0.414 |
| rs2295475  | XDH          | A | 0.270 | 0.766 | [0.583,1.007] | 0.056 | 0.619 | [0.36,1.064]   | 0.083 | 0.808 | [0.455,1.435]  | 0.467 | 0.052 |
| rs17274095 | BLM          | A | 0.175 | 0.830 | [0.603,1.142] | 0.252 | 1.033 | [0.6,1.777]    | 0.908 | 1.244 | [0.69,2.244]   | 0.468 | 0.500 |
| rs9944225  | CYP19A1      | A | 0.080 | 0.819 | [0.523,1.281] | 0.381 | 1.099 | [0.531,2.272]  | 0.799 | 1.342 | [0.604,2.984]  | 0.470 | 0.634 |

|            |           |   |       |       |               |       |       |               |       |       |               |       |       |
|------------|-----------|---|-------|-------|---------------|-------|-------|---------------|-------|-------|---------------|-------|-------|
| rs956868   | WNK1      | A | 0.158 | 0.906 | [0.657,1.248] | 0.545 | 1.127 | [0.653,1.944] | 0.668 | 1.244 | [0.687,2.253] | 0.471 | 0.729 |
| rs2281677  | SLC7A7    | T | 0.448 | 1.025 | [0.808,1.301] | 0.837 | 1.211 | [0.795,1.844] | 0.372 | 1.181 | [0.751,1.858] | 0.471 | 0.669 |
| rs2236379  | PRKCQ     | T | 0.269 | 1.146 | [0.878,1.496] | 0.317 | 0.943 | [0.575,1.548] | 0.817 | 0.823 | [0.485,1.397] | 0.471 | 0.566 |
| rs17710008 | MYCT1     | A | 0.142 | 1.254 | [0.905,1.738] | 0.174 | 0.970 | [0.5,1.884]   | 0.929 | 0.774 | [0.385,1.554] | 0.471 | 0.382 |
| rs2288831  | IL12B     | C | 0.248 | 0.988 | [0.755,1.293] | 0.929 | 0.809 | [0.487,1.344] | 0.413 | 0.819 | [0.476,1.411] | 0.472 | 0.716 |
| rs9890721  | MYCBPAP   | T | 0.465 | 1.100 | [0.864,1.402] | 0.439 | 0.924 | [0.592,1.442] | 0.727 | 0.840 | [0.521,1.352] | 0.472 | 0.667 |
| rs1729409  | APOA5     | C | 0.469 | 1.067 | [0.839,1.357] | 0.599 | 1.270 | [0.815,1.979] | 0.292 | 1.190 | [0.74,1.915]  | 0.472 | 0.532 |
| rs1635498  | EXO1      | G | 0.038 | 1.094 | [0.586,2.045] | 0.778 | 1.589 | [0.635,3.974] | 0.322 | 1.452 | [0.524,4.023] | 0.473 | 0.608 |
| rs4681     | FGB       | T | 0.149 | 1.201 | [0.873,1.652] | 0.261 | 0.946 | [0.51,1.753]  | 0.860 | 0.788 | [0.41,1.513]  | 0.474 | 0.502 |
| rs1800587  | IL1A      | T | 0.303 | 1.151 | [0.894,1.481] | 0.276 | 0.955 | [0.592,1.54]  | 0.851 | 0.830 | [0.499,1.382] | 0.474 | 0.521 |
| rs943975   | CYP2E1    | C | 0.157 | 1.121 | [0.793,1.585] | 0.518 | 1.404 | [0.796,2.476] | 0.241 | 1.253 | [0.676,2.321] | 0.474 | 0.450 |
| rs187238   | IL18      | G | 0.263 | 1.017 | [0.786,1.317] | 0.897 | 1.216 | [0.771,1.92]  | 0.400 | 1.196 | [0.733,1.951] | 0.474 | 0.702 |
| rs1760216  | DPYD      | A | 0.185 | 0.916 | [0.679,1.235] | 0.566 | 0.730 | [0.406,1.312] | 0.293 | 0.797 | [0.427,1.486] | 0.475 | 0.521 |
| rs3826705  | POU2F2    | C | 0.106 | 0.914 | [0.616,1.355] | 0.655 | 1.190 | [0.611,2.318] | 0.609 | 1.302 | [0.631,2.688] | 0.475 | 0.764 |
| rs1051677  | XRCC5     | C | 0.110 | 0.985 | [0.676,1.435] | 0.937 | 0.736 | [0.345,1.57]  | 0.428 | 0.747 | [0.335,1.666] | 0.476 | 0.730 |
| rs11407    | LOC390940 | A | 0.174 | 1.074 | [0.787,1.467] | 0.651 | 0.854 | [0.472,1.544] | 0.601 | 0.795 | [0.422,1.495] | 0.476 | 0.760 |
| rs9282715  | IGF1R     | C | 0.116 | 0.986 | [0.658,1.478] | 0.946 | 1.285 | [0.661,2.498] | 0.460 | 1.303 | [0.629,2.7]   | 0.477 | 0.750 |
| rs2375744  | HNMT      | A | 0.162 | 0.938 | [0.681,1.292] | 0.694 | 1.164 | [0.668,2.028] | 0.591 | 1.242 | [0.684,2.256] | 0.477 | 0.771 |
| rs6720173  | ABCG5     | C | 0.192 | 1.101 | [0.823,1.472] | 0.519 | 1.337 | [0.812,2.204] | 0.254 | 1.215 | [0.71,2.08]   | 0.477 | 0.466 |
| rs2508784  | MRE11A    | G | 0.492 | 1.057 | [0.841,1.33]  | 0.633 | 0.900 | [0.594,1.364] | 0.619 | 0.851 | [0.546,1.328] | 0.478 | 0.758 |
| rs1130864  | CRP       | T | 0.284 | 1.035 | [0.801,1.338] | 0.791 | 1.231 | [0.79,1.916]  | 0.358 | 1.189 | [0.736,1.919] | 0.479 | 0.649 |
| rs4722266  | STK31     | A | 0.154 | 1.038 | [0.755,1.427] | 0.819 | 0.820 | [0.445,1.511] | 0.525 | 0.790 | [0.412,1.516] | 0.479 | 0.778 |
| rs2279344  | CYP2B6    | G | 0.310 | 1.051 | [0.813,1.359] | 0.704 | 0.872 | [0.538,1.415] | 0.580 | 0.830 | [0.495,1.391] | 0.479 | 0.772 |
| rs2839685  | CXCL12    | T | 0.163 | 1.075 | [0.78,1.482]  | 0.659 | 0.851 | [0.463,1.563] | 0.602 | 0.791 | [0.414,1.514] | 0.479 | 0.764 |
| rs1934961  | CYP2C9    | A | 0.028 | 1.404 | [0.612,3.224] | 0.423 | 2.282 | [0.69,7.552]  | 0.176 | 1.625 | [0.421,6.279] | 0.481 | 0.334 |
| rs2243251  | IL4       | G | 0.030 | 0.575 | [0.231,1.43]  | 0.234 | 0.307 | [0.063,1.494] | 0.144 | 0.535 | [0.094,3.049] | 0.481 | 0.199 |
| rs2243268  | IL4       | C | 0.191 | 1.352 | [1.03,1.773]  | 0.030 | 1.108 | [0.656,1.871] | 0.702 | 0.820 | [0.471,1.426] | 0.481 | 0.094 |
| rs2272611  | ARHGEF10  | A | 0.143 | 0.855 | [0.614,1.189] | 0.350 | 0.661 | [0.337,1.298] | 0.229 | 0.774 | [0.379,1.581] | 0.482 | 0.353 |
| rs3024491  | IL10      | T | 0.421 | 0.954 | [0.75,1.213]  | 0.701 | 0.803 | [0.512,1.259] | 0.338 | 0.841 | [0.52,1.361]  | 0.482 | 0.611 |
| rs10264272 | CYP3A5    | T | 0.017 | 0.960 | [0.363,2.538] | 0.934 | 0.444 | [0.06,3.303]  | 0.428 | 0.463 | [0.054,3.963] | 0.482 | 0.730 |
| rs1800457  | CYB5R3    | G | 0.053 | 1.530 | [0.728,3.214] | 0.262 | 2.411 | [0.774,7.512] | 0.129 | 1.576 | [0.444,5.601] | 0.482 | 0.207 |
| rs4252596  | ERBB2     | A | 0.120 | 0.895 | [0.615,1.301] | 0.561 | 1.152 | [0.6,2.21]    | 0.671 | 1.287 | [0.637,2.601] | 0.482 | 0.740 |
| rs1284605  | MBD6      | T | 0.175 | 0.740 | [0.537,1.02]  | 0.066 | 0.919 | [0.529,1.595] | 0.763 | 1.241 | [0.679,2.267] | 0.483 | 0.184 |
| rs2023410  | ADRB3     | G | 0.292 | 0.924 | [0.705,1.213] | 0.571 | 0.763 | [0.463,1.258] | 0.289 | 0.825 | [0.483,1.411] | 0.483 | 0.520 |
| rs6489738  | GNB3      | T | 0.400 | 0.862 | [0.67,1.109]  | 0.248 | 1.024 | [0.656,1.598] | 0.916 | 1.188 | [0.734,1.923] | 0.483 | 0.496 |
| rs7604639  | MERTK     | G | 0.389 | 1.125 | [0.883,1.432] | 0.340 | 1.326 | [0.865,2.034] | 0.195 | 1.179 | [0.744,1.869] | 0.483 | 0.319 |
| rs4128473  | DPYD      | C | 0.191 | 1.229 | [0.888,1.701] | 0.213 | 1.517 | [0.881,2.611] | 0.133 | 1.234 | [0.686,2.22]  | 0.483 | 0.191 |
| rs1611764  | SPRR1A    | G | 0.442 | 0.903 | [0.709,1.15]  | 0.409 | 0.765 | [0.496,1.179] | 0.225 | 0.847 | [0.532,1.348] | 0.483 | 0.385 |
| rs40401    | IL3       | T | 0.295 | 1.019 | [0.783,1.325] | 0.889 | 1.213 | [0.773,1.903] | 0.401 | 1.191 | [0.731,1.939] | 0.484 | 0.702 |
| rs6162     | CYP17A1   | A | 0.430 | 1.041 | [0.826,1.313] | 0.732 | 0.884 | [0.576,1.357] | 0.573 | 0.849 | [0.537,1.342] | 0.484 | 0.780 |
| rs1800849  | UCP3      | T | 0.216 | 1.015 | [0.763,1.352] | 0.917 | 1.230 | [0.745,2.032] | 0.418 | 1.212 | [0.707,2.078] | 0.485 | 0.720 |

|            |          |   |       |       |               |       |       |               |       |       |               |       |       |
|------------|----------|---|-------|-------|---------------|-------|-------|---------------|-------|-------|---------------|-------|-------|
| rs241447   | TAP2     | G | 0.225 | 0.992 | [0.751,1.31]  | 0.953 | 0.815 | [0.486,1.367] | 0.438 | 0.822 | [0.473,1.427] | 0.485 | 0.739 |
| rs1049434  | SLC16A1  | T | 0.379 | 0.913 | [0.716,1.165] | 0.465 | 1.080 | [0.696,1.677] | 0.731 | 1.183 | [0.738,1.896] | 0.486 | 0.692 |
| rs7169     | SLC16A1  | C | 0.379 | 0.913 | [0.716,1.165] | 0.465 | 1.080 | [0.696,1.677] | 0.731 | 1.183 | [0.738,1.896] | 0.486 | 0.692 |
| rs13339152 | RUNDC2A  | C | 0.105 | 1.022 | [0.696,1.501] | 0.912 | 0.785 | [0.393,1.565] | 0.491 | 0.768 | [0.365,1.615] | 0.486 | 0.773 |
| rs7312411  | VWF      | G | 0.399 | 1.061 | [0.83,1.357]  | 0.636 | 1.250 | [0.816,1.914] | 0.304 | 1.178 | [0.743,1.868] | 0.486 | 0.558 |
| rs11632547 | CYP1A1   | A | 0.048 | 1.043 | [0.609,1.787] | 0.877 | 1.435 | [0.632,3.257] | 0.388 | 1.375 | [0.56,3.374]  | 0.487 | 0.689 |
| rs279941   | SLC10A2  | T | 0.120 | 1.140 | [0.801,1.623] | 0.467 | 1.418 | [0.802,2.506] | 0.230 | 1.244 | [0.672,2.3]   | 0.487 | 0.424 |
| rs2039449  | DPYD     | C | 0.289 | 0.971 | [0.748,1.262] | 0.828 | 1.155 | [0.734,1.818] | 0.532 | 1.189 | [0.729,1.94]  | 0.487 | 0.784 |
| rs2020898  | CASP9    | T | 0.393 | 1.215 | [0.955,1.546] | 0.113 | 1.023 | [0.649,1.613] | 0.922 | 0.842 | [0.518,1.369] | 0.488 | 0.284 |
| rs2275554  | AK7      | A | 0.245 | 0.827 | [0.623,1.097] | 0.188 | 0.997 | [0.612,1.624] | 0.990 | 1.205 | [0.709,2.049] | 0.490 | 0.415 |
| rs26279    | MSH3     | G | 0.300 | 0.857 | [0.664,1.108] | 0.239 | 1.016 | [0.651,1.584] | 0.945 | 1.185 | [0.732,1.916] | 0.490 | 0.487 |
| rs1703874  | FLJ00290 | A | 0.250 | 0.898 | [0.684,1.18]  | 0.439 | 1.075 | [0.67,1.725]  | 0.765 | 1.197 | [0.718,1.997] | 0.491 | 0.681 |
| rs13035    | PYROXD1  | C | 0.394 | 1.087 | [0.85,1.389]  | 0.506 | 1.285 | [0.823,2.006] | 0.270 | 1.182 | [0.734,1.905] | 0.491 | 0.477 |
| rs1042579  | THBD     | T | 0.162 | 1.019 | [0.74,1.403]  | 0.909 | 1.255 | [0.724,2.177] | 0.418 | 1.232 | [0.681,2.23]  | 0.491 | 0.721 |
| rs3795498  | STK40    | A | 0.227 | 1.110 | [0.84,1.468]  | 0.462 | 0.909 | [0.532,1.553] | 0.727 | 0.819 | [0.463,1.448] | 0.491 | 0.689 |
| rs3088440  | C9orf53  | A | 0.116 | 1.046 | [0.723,1.514] | 0.812 | 1.318 | [0.716,2.427] | 0.375 | 1.261 | [0.651,2.441] | 0.492 | 0.671 |
| rs2280712  | PARP1    | A | 0.157 | 0.799 | [0.576,1.109] | 0.179 | 0.621 | [0.315,1.225] | 0.169 | 0.777 | [0.378,1.597] | 0.492 | 0.190 |
| rs17057901 | PBK      | G | 0.013 | 1.233 | [0.432,3.52]  | 0.696 | 0.562 | [0.068,4.614] | 0.592 | 0.456 | [0.048,4.308] | 0.493 | 0.782 |
| rs2074900  | CYP4F2   | A | 0.252 | 0.698 | [0.521,0.934] | 0.016 | 0.846 | [0.509,1.405] | 0.518 | 1.213 | [0.699,2.104] | 0.493 | 0.051 |
| rs6666652  | ABCA4    | A | 0.116 | 1.030 | [0.671,1.583] | 0.892 | 0.775 | [0.366,1.641] | 0.505 | 0.752 | [0.333,1.699] | 0.493 | 0.781 |
| rs1770810  | SLC2A1   | T | 0.188 | 0.886 | [0.647,1.214] | 0.453 | 1.085 | [0.638,1.844] | 0.763 | 1.224 | [0.686,2.183] | 0.493 | 0.694 |
| rs12922317 | RUNDC2A  | G | 0.337 | 0.945 | [0.743,1.203] | 0.647 | 1.108 | [0.726,1.689] | 0.635 | 1.172 | [0.744,1.847] | 0.494 | 0.775 |
| rs2236579  | ITGA8    | C | 0.154 | 1.013 | [0.729,1.407] | 0.940 | 1.255 | [0.71,2.217]  | 0.435 | 1.239 | [0.67,2.292]  | 0.494 | 0.736 |
| rs6463524  | PMS2     | G | 0.184 | 1.299 | [0.981,1.721] | 0.068 | 1.065 | [0.622,1.825] | 0.818 | 0.820 | [0.463,1.451] | 0.495 | 0.189 |
| rs2235033  | ABCB1    | C | 0.493 | 1.007 | [0.796,1.275] | 0.951 | 1.184 | [0.768,1.824] | 0.445 | 1.175 | [0.739,1.868] | 0.495 | 0.746 |
| rs2069442  | CDK5     | G | 0.304 | 0.765 | [0.59,0.991]  | 0.042 | 0.907 | [0.577,1.425] | 0.671 | 1.185 | [0.727,1.934] | 0.496 | 0.126 |
| rs2665802  | GH1      | T | 0.362 | 1.034 | [0.81,1.321]  | 0.787 | 0.876 | [0.561,1.368] | 0.561 | 0.847 | [0.525,1.366] | 0.496 | 0.793 |
| rs2239360  | FANCA    | T | 0.394 | 1.369 | [1.08,1.736]  | 0.009 | 1.604 | [1.044,2.464] | 0.031 | 1.172 | [0.742,1.851] | 0.497 | 0.007 |
| rs1801376  | BUB1B    | G | 0.285 | 0.998 | [0.773,1.289] | 0.988 | 0.834 | [0.513,1.355] | 0.464 | 0.836 | [0.498,1.403] | 0.497 | 0.762 |
| rs3181077  | CCR1     | G | 0.221 | 1.060 | [0.8,1.403]   | 0.685 | 1.272 | [0.779,2.076] | 0.336 | 1.200 | [0.708,2.033] | 0.497 | 0.608 |
| rs1514497  | DPYD     | T | 0.300 | 0.970 | [0.748,1.258] | 0.820 | 1.149 | [0.73,1.809]  | 0.548 | 1.184 | [0.726,1.932] | 0.498 | 0.794 |
| rs2071520  | TNC      | C | 0.320 | 1.174 | [0.917,1.503] | 0.203 | 0.991 | [0.626,1.568] | 0.969 | 0.844 | [0.517,1.377] | 0.498 | 0.435 |
| rs798757   | TACC3    | G | 0.179 | 1.041 | [0.768,1.412] | 0.796 | 1.260 | [0.758,2.092] | 0.373 | 1.210 | [0.697,2.099] | 0.498 | 0.667 |
| rs1530662  | FBXO25   | T | 0.495 | 1.034 | [0.816,1.312] | 0.780 | 1.215 | [0.787,1.874] | 0.379 | 1.174 | [0.738,1.87]  | 0.498 | 0.671 |
| rs679899   | APOB     | A | 0.438 | 0.954 | [0.746,1.22]  | 0.705 | 1.126 | [0.719,1.764] | 0.604 | 1.181 | [0.73,1.911]  | 0.498 | 0.789 |
| rs2304975  | PSMB6    | T | 0.076 | 0.985 | [0.645,1.504] | 0.944 | 0.723 | [0.309,1.695] | 0.456 | 0.735 | [0.301,1.794] | 0.498 | 0.757 |
| rs592943   | MRE11A   | T | 0.297 | 0.969 | [0.747,1.256] | 0.810 | 1.149 | [0.726,1.818] | 0.553 | 1.186 | [0.723,1.945] | 0.499 | 0.795 |
| rs2756105  | ABCC2    | T | 0.389 | 1.272 | [0.983,1.647] | 0.068 | 1.072 | [0.678,1.698] | 0.765 | 0.843 | [0.514,1.383] | 0.499 | 0.188 |
| rs3755160  | ABCB11   | T | 0.340 | 1.045 | [0.819,1.333] | 0.725 | 1.230 | [0.79,1.913]  | 0.359 | 1.177 | [0.733,1.889] | 0.500 | 0.640 |
| rs998075   | IGF2R    | T | 0.484 | 0.866 | [0.682,1.1]   | 0.239 | 1.013 | [0.663,1.548] | 0.951 | 1.170 | [0.742,1.844] | 0.500 | 0.487 |
| rs3794318  | AICDA    | C | 0.131 | 1.175 | [0.817,1.691] | 0.385 | 1.462 | [0.817,2.616] | 0.201 | 1.244 | [0.659,2.349] | 0.501 | 0.352 |

|            |           |   |       |       |               |       |       |               |       |       |               |       |       |
|------------|-----------|---|-------|-------|---------------|-------|-------|---------------|-------|-------|---------------|-------|-------|
| rs1491961  | CCR1      | T | 0.220 | 1.067 | [0.806,1.412] | 0.650 | 1.279 | [0.784,2.086] | 0.325 | 1.198 | [0.708,2.029] | 0.501 | 0.587 |
| rs6410     | CYP11B1   | A | 0.479 | 0.865 | [0.679,1.101] | 0.239 | 1.013 | [0.662,1.549] | 0.954 | 1.171 | [0.74,1.853]  | 0.501 | 0.488 |
| rs2292954  | SPG7      | C | 0.156 | 0.927 | [0.664,1.294] | 0.655 | 1.153 | [0.64,2.074]  | 0.636 | 1.244 | [0.659,2.347] | 0.501 | 0.782 |
| rs2234693  | ESR1      | C | 0.473 | 1.065 | [0.843,1.346] | 0.596 | 0.912 | [0.598,1.391] | 0.669 | 0.856 | [0.544,1.347] | 0.501 | 0.764 |
| rs2281891  | CYP2C18   | A | 0.146 | 1.138 | [0.823,1.573] | 0.435 | 0.903 | [0.479,1.703] | 0.753 | 0.794 | [0.405,1.556] | 0.502 | 0.675 |
| rs4986894  | CYP2C19   | C | 0.146 | 1.138 | [0.823,1.573] | 0.435 | 0.903 | [0.479,1.703] | 0.753 | 0.794 | [0.405,1.556] | 0.502 | 0.675 |
| rs699473   | SOD3      | C | 0.412 | 1.035 | [0.812,1.317] | 0.783 | 0.878 | [0.56,1.375]  | 0.569 | 0.848 | [0.525,1.371] | 0.502 | 0.798 |
| rs1800890  | IL10      | A | 0.353 | 0.987 | [0.769,1.267] | 0.919 | 0.832 | [0.522,1.327] | 0.440 | 0.843 | [0.512,1.387] | 0.502 | 0.743 |
| rs4244285  | CYP2C19   | A | 0.147 | 1.133 | [0.819,1.566] | 0.451 | 0.900 | [0.477,1.696] | 0.744 | 0.794 | [0.405,1.557] | 0.502 | 0.686 |
| rs754      | LOC729296 | G | 0.157 | 1.199 | [0.846,1.701] | 0.308 | 1.494 | [0.823,2.711] | 0.187 | 1.246 | [0.655,2.369] | 0.503 | 0.297 |
| rs1920313  | SLC15A2   | A | 0.012 | 1.234 | [0.425,3.578] | 0.699 | 0.580 | [0.072,4.646] | 0.608 | 0.470 | [0.052,4.276] | 0.503 | 0.789 |
| rs875120   | TTR       | T | 0.049 | 0.936 | [0.54,1.622]  | 0.814 | 0.606 | [0.181,2.028] | 0.416 | 0.648 | [0.181,2.31]  | 0.503 | 0.711 |
| rs2303078  | HMMR      | A | 0.052 | 0.734 | [0.42,1.28]   | 0.275 | 0.473 | [0.138,1.62]  | 0.233 | 0.644 | [0.177,2.348] | 0.505 | 0.309 |
| rs1003483  | IGF2      | G | 0.444 | 1.059 | [0.83,1.351]  | 0.645 | 1.248 | [0.795,1.959] | 0.335 | 1.179 | [0.727,1.912] | 0.505 | 0.593 |
| rs2234898  | IL4R      | T | 0.199 | 0.920 | [0.665,1.273] | 0.614 | 1.126 | [0.651,1.948] | 0.671 | 1.224 | [0.674,2.223] | 0.506 | 0.777 |
| rs31480    | IL3       | T | 0.216 | 1.024 | [0.769,1.362] | 0.873 | 1.225 | [0.748,2.005] | 0.419 | 1.197 | [0.703,2.037] | 0.508 | 0.721 |
| rs2297881  | KIF1B     | C | 0.034 | 0.955 | [0.503,1.814] | 0.889 | 1.368 | [0.521,3.596] | 0.525 | 1.432 | [0.494,4.157] | 0.509 | 0.791 |
| rs3766871  | RYR2      | A | 0.054 | 1.389 | [0.849,2.272] | 0.191 | 0.984 | [0.374,2.592] | 0.975 | 0.709 | [0.255,1.968] | 0.509 | 0.414 |
| rs2972393  | GHR       | A | 0.428 | 1.174 | [0.923,1.492] | 0.191 | 1.374 | [0.888,2.124] | 0.153 | 1.170 | [0.734,1.867] | 0.509 | 0.194 |
| rs4820889  | TCN2      | A | 0.044 | 0.623 | [0.316,1.228] | 0.172 | 0.911 | [0.34,2.442]  | 0.853 | 1.462 | [0.474,4.509] | 0.509 | 0.393 |
| rs17420378 | STK4      | A | 0.261 | 1.125 | [0.862,1.469] | 0.386 | 0.942 | [0.573,1.547] | 0.812 | 0.837 | [0.493,1.42]  | 0.509 | 0.643 |
| rs9462088  | FANCE     | A | 0.115 | 0.981 | [0.667,1.444] | 0.923 | 0.759 | [0.373,1.546] | 0.448 | 0.774 | [0.361,1.658] | 0.510 | 0.750 |
| rs2070507  | PPM1F     | C | 0.047 | 2.144 | [1.319,3.485] | 0.002 | 1.539 | [0.589,4.019] | 0.379 | 0.718 | [0.268,1.923] | 0.510 | 0.008 |
| rs2479717  | CCND3     | T | 0.224 | 0.847 | [0.635,1.129] | 0.258 | 1.016 | [0.616,1.678] | 0.949 | 1.200 | [0.698,2.062] | 0.510 | 0.515 |
| rs1042157  | SULT1A1   | T | 0.384 | 1.079 | [0.843,1.382] | 0.546 | 1.269 | [0.811,1.986] | 0.298 | 1.176 | [0.726,1.904] | 0.510 | 0.521 |
| rs1270146  | MRE11A    | C | 0.491 | 1.055 | [0.84,1.325]  | 0.647 | 0.909 | [0.601,1.374] | 0.652 | 0.862 | [0.554,1.341] | 0.510 | 0.785 |
| rs1800795  | IL6       | C | 0.326 | 1.151 | [0.906,1.462] | 0.250 | 0.978 | [0.619,1.544] | 0.924 | 0.850 | [0.523,1.381] | 0.511 | 0.499 |
| rs3218649  | POLQ      | C | 0.364 | 0.843 | [0.663,1.072] | 0.164 | 0.719 | [0.461,1.12]  | 0.145 | 0.852 | [0.529,1.373] | 0.511 | 0.166 |
| rs3776969  | MSH3      | A | 0.105 | 1.270 | [0.886,1.82]  | 0.193 | 1.004 | [0.517,1.951] | 0.991 | 0.791 | [0.392,1.595] | 0.512 | 0.420 |
| rs2074351  | PON1      | A | 0.296 | 0.927 | [0.722,1.191] | 0.555 | 0.785 | [0.493,1.251] | 0.308 | 0.846 | [0.514,1.393] | 0.512 | 0.536 |
| rs434455   | RUNDC2A   | T | 0.209 | 1.129 | [0.845,1.509] | 0.413 | 0.935 | [0.551,1.585] | 0.802 | 0.828 | [0.471,1.457] | 0.512 | 0.667 |
| rs3842787  | PTGS1     | T | 0.079 | 0.792 | [0.49,1.282]  | 0.343 | 0.560 | [0.212,1.484] | 0.244 | 0.707 | [0.251,1.995] | 0.513 | 0.361 |
| rs2020955  | ERCC4     | C | 0.030 | 1.071 | [0.479,2.397] | 0.867 | 0.624 | [0.139,2.804] | 0.538 | 0.582 | [0.115,2.937] | 0.513 | 0.804 |
| rs1970142  | DPYD      | T | 0.289 | 0.933 | [0.718,1.213] | 0.606 | 1.110 | [0.683,1.805] | 0.673 | 1.190 | [0.707,2.003] | 0.513 | 0.774 |
| rs2230129  | TAF1C     | A | 0.364 | 0.832 | [0.653,1.06]  | 0.137 | 0.973 | [0.63,1.503]  | 0.902 | 1.169 | [0.732,1.866] | 0.513 | 0.331 |
| rs2012199  | FCRL5     | C | 0.150 | 0.700 | [0.497,0.987] | 0.042 | 0.551 | [0.281,1.078] | 0.082 | 0.787 | [0.383,1.615] | 0.513 | 0.039 |
| rs3014626  | PPP1R15B  | T | 0.012 | 0.787 | [0.231,2.687] | 0.702 | 1.487 | [0.279,7.94]  | 0.642 | 1.890 | [0.28,12.737] | 0.513 | 0.806 |
| rs755622   | MIF       | G | 0.226 | 1.254 | [0.945,1.666] | 0.117 | 1.043 | [0.623,1.748] | 0.872 | 0.832 | [0.479,1.445] | 0.513 | 0.293 |
| rs9436299  | LEPR      | C | 0.306 | 1.095 | [0.85,1.409]  | 0.483 | 1.287 | [0.819,2.02]  | 0.274 | 1.175 | [0.724,1.909] | 0.513 | 0.472 |
| rs1800682  | FAS       | C | 0.496 | 0.964 | [0.761,1.221] | 0.762 | 1.126 | [0.728,1.741] | 0.593 | 1.168 | [0.733,1.861] | 0.513 | 0.806 |
| rs169758   | TPTE      | A | 0.082 | 0.919 | [0.553,1.529] | 0.745 | 1.241 | [0.544,2.827] | 0.608 | 1.350 | [0.548,3.323] | 0.514 | 0.807 |

|            |          |   |       |       |               |       |       |               |       |       |               |       |       |
|------------|----------|---|-------|-------|---------------|-------|-------|---------------|-------|-------|---------------|-------|-------|
| rs664677   | ATM      | C | 0.393 | 0.964 | [0.759,1.225] | 0.766 | 0.825 | [0.532,1.279] | 0.389 | 0.855 | [0.534,1.368] | 0.514 | 0.679 |
| rs11569017 | EGF      | T | 0.053 | 0.841 | [0.476,1.488] | 0.553 | 1.187 | [0.463,3.047] | 0.721 | 1.411 | [0.5,3.984]   | 0.516 | 0.763 |
| rs2287498  | TP53     | A | 0.115 | 1.210 | [0.83,1.765]  | 0.322 | 0.942 | [0.464,1.913] | 0.869 | 0.779 | [0.366,1.657] | 0.516 | 0.585 |
| rs568408   | IL12A    | A | 0.145 | 1.158 | [0.833,1.61]  | 0.382 | 0.934 | [0.508,1.715] | 0.825 | 0.806 | [0.421,1.544] | 0.516 | 0.643 |
| rs4148217  | ABCG8    | A | 0.213 | 0.868 | [0.648,1.163] | 0.343 | 1.038 | [0.631,1.707] | 0.883 | 1.196 | [0.696,2.054] | 0.516 | 0.613 |
| rs7011     | CINP     | T | 0.245 | 1.015 | [0.775,1.33]  | 0.912 | 1.201 | [0.749,1.925] | 0.448 | 1.183 | [0.712,1.965] | 0.517 | 0.749 |
| rs1709409  | DPYD     | G | 0.226 | 0.952 | [0.719,1.261] | 0.732 | 0.788 | [0.462,1.346] | 0.383 | 0.828 | [0.468,1.466] | 0.517 | 0.666 |
| rs610308   | PPP1R15A | C | 0.388 | 1.065 | [0.824,1.378] | 0.630 | 0.902 | [0.562,1.446] | 0.668 | 0.846 | [0.51,1.403]  | 0.518 | 0.785 |
| rs4646315  | COMT     | C | 0.172 | 1.098 | [0.807,1.493] | 0.552 | 0.877 | [0.459,1.673] | 0.689 | 0.799 | [0.404,1.579] | 0.518 | 0.749 |
| rs1051130  | CCND3    | T | 0.414 | 0.982 | [0.779,1.239] | 0.881 | 1.135 | [0.756,1.706] | 0.541 | 1.156 | [0.745,1.792] | 0.518 | 0.806 |
| rs1263167  | APOA5    | G | 0.169 | 0.817 | [0.59,1.132]  | 0.225 | 0.652 | [0.341,1.243] | 0.194 | 0.797 | [0.401,1.585] | 0.518 | 0.244 |
| rs1870049  | CYP19A1  | C | 0.168 | 0.906 | [0.648,1.267] | 0.564 | 0.731 | [0.398,1.342] | 0.312 | 0.807 | [0.421,1.547] | 0.518 | 0.545 |
| rs9658655  | CHGA     | C | 0.105 | 0.880 | [0.597,1.296] | 0.516 | 1.103 | [0.59,2.063]  | 0.759 | 1.254 | [0.63,2.496]  | 0.520 | 0.747 |
| rs1060896  | SLC28A2  | C | 0.461 | 1.060 | [0.833,1.35]  | 0.637 | 0.907 | [0.581,1.414] | 0.666 | 0.856 | [0.532,1.377] | 0.520 | 0.789 |
| rs2066827  | CDKN1B   | G | 0.311 | 0.922 | [0.683,1.246] | 0.598 | 1.100 | [0.67,1.805]  | 0.706 | 1.192 | [0.697,2.039] | 0.520 | 0.780 |
| rs4149965  | EXO1     | A | 0.201 | 0.969 | [0.725,1.296] | 0.832 | 1.161 | [0.696,1.936] | 0.567 | 1.198 | [0.69,2.081]  | 0.521 | 0.813 |
| rs8058694  | ABCC6    | T | 0.479 | 0.912 | [0.716,1.162] | 0.456 | 1.063 | [0.687,1.646] | 0.783 | 1.166 | [0.729,1.866] | 0.522 | 0.705 |
| rs4135113  | TDG      | A | 0.052 | 1.007 | [0.554,1.829] | 0.982 | 1.400 | [0.558,3.517] | 0.473 | 1.391 | [0.506,3.82]  | 0.522 | 0.770 |
| rs7709790  | GHR      | G | 0.231 | 1.113 | [0.836,1.482] | 0.463 | 1.322 | [0.811,2.155] | 0.262 | 1.188 | [0.7,2.015]   | 0.523 | 0.452 |
| rs1042821  | MSH6     | T | 0.190 | 1.091 | [0.803,1.481] | 0.579 | 0.898 | [0.514,1.566] | 0.704 | 0.823 | [0.453,1.496] | 0.523 | 0.771 |
| rs921519   | ERICH1   | C | 0.201 | 0.897 | [0.672,1.196] | 0.457 | 0.738 | [0.42,1.295]  | 0.289 | 0.823 | [0.453,1.497] | 0.523 | 0.473 |
| rs3181218  | IL12B    | A | 0.251 | 1.012 | [0.769,1.332] | 0.933 | 0.846 | [0.508,1.411] | 0.522 | 0.836 | [0.483,1.447] | 0.523 | 0.804 |
| rs6500452  | FANCA    | C | 0.353 | 1.304 | [1.026,1.657] | 0.030 | 1.513 | [0.987,2.32]  | 0.058 | 1.160 | [0.735,1.833] | 0.523 | 0.027 |
| rs423904   | IL1RN    | T | 0.258 | 1.113 | [0.845,1.465] | 0.446 | 0.932 | [0.561,1.548] | 0.787 | 0.838 | [0.487,1.443] | 0.523 | 0.697 |
| rs1800947  | CRP      | C | 0.054 | 0.716 | [0.406,1.261] | 0.247 | 1.007 | [0.389,2.609] | 0.989 | 1.407 | [0.493,4.02]  | 0.524 | 0.506 |
| rs557148   | MRE11A   | C | 0.481 | 1.134 | [0.897,1.434] | 0.292 | 0.980 | [0.644,1.491] | 0.923 | 0.864 | [0.55,1.355]  | 0.524 | 0.557 |
| rs7517376  | FMO1     | G | 0.198 | 1.015 | [0.73,1.41]   | 0.932 | 1.228 | [0.716,2.105] | 0.456 | 1.210 | [0.673,2.177] | 0.524 | 0.757 |
| rs4646487  | CYP4B1   | T | 0.138 | 0.746 | [0.519,1.07]  | 0.112 | 0.928 | [0.501,1.717] | 0.812 | 1.244 | [0.635,2.438] | 0.524 | 0.282 |
| rs508078   | GSTA4    | A | 0.086 | 1.125 | [0.736,1.72]  | 0.587 | 0.842 | [0.362,1.956] | 0.689 | 0.748 | [0.307,1.827] | 0.524 | 0.770 |
| rs3770582  | ABCB11   | A | 0.469 | 1.156 | [0.917,1.456] | 0.220 | 0.996 | [0.65,1.527]  | 0.987 | 0.862 | [0.546,1.361] | 0.525 | 0.463 |
| rs7512785  | FMO2     | T | 0.303 | 0.877 | [0.676,1.139] | 0.326 | 1.028 | [0.653,1.621] | 0.904 | 1.172 | [0.718,1.914] | 0.526 | 0.596 |
| rs3887412  | ABCC1    | T | 0.230 | 1.172 | [0.877,1.565] | 0.284 | 0.975 | [0.573,1.657] | 0.925 | 0.832 | [0.471,1.47]  | 0.526 | 0.547 |
| rs3826573  | CTDP1    | T | 0.403 | 1.020 | [0.788,1.32]  | 0.879 | 1.191 | [0.766,1.852] | 0.438 | 1.167 | [0.723,1.884] | 0.526 | 0.739 |
| rs4646491  | CYP4B1   | T | 0.136 | 0.808 | [0.564,1.158] | 0.246 | 0.630 | [0.305,1.299] | 0.211 | 0.779 | [0.36,1.687]  | 0.526 | 0.270 |
| rs3212227  | IL12B    | C | 0.247 | 0.960 | [0.733,1.258] | 0.768 | 0.805 | [0.484,1.339] | 0.403 | 0.839 | [0.486,1.446] | 0.527 | 0.693 |
| rs1801280  | NAT2     | C | 0.400 | 1.081 | [0.853,1.371] | 0.518 | 0.931 | [0.603,1.438] | 0.747 | 0.861 | [0.541,1.371] | 0.528 | 0.744 |
| rs1126643  | ITGA2    | T | 0.384 | 1.199 | [0.944,1.522] | 0.137 | 1.028 | [0.658,1.606] | 0.903 | 0.858 | [0.533,1.381] | 0.528 | 0.331 |
| rs1800791  | FGB      | A | 0.160 | 0.883 | [0.629,1.239] | 0.472 | 1.084 | [0.602,1.953] | 0.788 | 1.227 | [0.65,2.319]  | 0.528 | 0.720 |
| rs3786187  | NFATC1   | C | 0.439 | 0.950 | [0.75,1.204]  | 0.673 | 0.820 | [0.536,1.255] | 0.361 | 0.863 | [0.546,1.364] | 0.528 | 0.630 |
| rs1760210  | DPYD     | C | 0.178 | 1.253 | [0.928,1.692] | 0.141 | 1.496 | [0.894,2.504] | 0.125 | 1.194 | [0.687,2.074] | 0.529 | 0.143 |
| rs1801406  | BRCA2    | G | 0.294 | 1.011 | [0.773,1.322] | 0.938 | 1.189 | [0.744,1.9]   | 0.470 | 1.176 | [0.709,1.95]  | 0.529 | 0.770 |

|            |          |   |       |       |               |       |       |               |       |       |               |       |       |
|------------|----------|---|-------|-------|---------------|-------|-------|---------------|-------|-------|---------------|-------|-------|
| rs3213469  | ATF6B    | G | 0.241 | 1.159 | [0.879,1.527] | 0.295 | 1.374 | [0.835,2.263] | 0.211 | 1.186 | [0.696,2.02]  | 0.530 | 0.314 |
| rs660339   | UCP2     | T | 0.423 | 1.203 | [0.947,1.527] | 0.130 | 1.039 | [0.68,1.589]  | 0.859 | 0.864 | [0.548,1.363] | 0.530 | 0.317 |
| rs4645878  | BAX      | A | 0.107 | 1.000 | [0.687,1.454] | 0.999 | 0.779 | [0.376,1.614] | 0.502 | 0.779 | [0.358,1.697] | 0.530 | 0.796 |
| rs1062633  | MST1R    | A | 0.477 | 0.912 | [0.721,1.153] | 0.442 | 1.054 | [0.693,1.603] | 0.806 | 1.156 | [0.735,1.817] | 0.530 | 0.699 |
| rs729940   | CHGA     | T | 0.155 | 1.147 | [0.817,1.609] | 0.428 | 1.416 | [0.763,2.626] | 0.270 | 1.235 | [0.639,2.386] | 0.531 | 0.444 |
| rs1043720  | ADRB3    | A | 0.274 | 0.837 | [0.642,1.092] | 0.189 | 0.983 | [0.616,1.57]  | 0.944 | 1.175 | [0.709,1.947] | 0.531 | 0.420 |
| rs4364     | ACE      | A | 0.023 | 1.104 | [0.463,2.637] | 0.823 | 0.647 | [0.138,3.034] | 0.581 | 0.586 | [0.11,3.126]  | 0.532 | 0.822 |
| rs10228128 | SHFM1    | C | 0.015 | 0.942 | [0.315,2.814] | 0.914 | 1.537 | [0.431,5.49]  | 0.508 | 1.633 | [0.351,7.599] | 0.532 | 0.784 |
| rs2243289  | IL4      | G | 0.192 | 1.369 | [1.043,1.798] | 0.024 | 1.147 | [0.677,1.942] | 0.610 | 0.838 | [0.481,1.46]  | 0.532 | 0.077 |
| rs998074   | IGF2R    | A | 0.489 | 0.861 | [0.678,1.093] | 0.219 | 0.995 | [0.651,1.523] | 0.983 | 1.157 | [0.733,1.826] | 0.532 | 0.464 |
| rs440454   | RDBP     | T | 0.265 | 0.910 | [0.696,1.19]  | 0.491 | 1.071 | [0.666,1.721] | 0.777 | 1.177 | [0.705,1.963] | 0.533 | 0.733 |
| rs1129055  | CD86     | A | 0.250 | 1.161 | [0.897,1.504] | 0.257 | 0.984 | [0.603,1.606] | 0.950 | 0.848 | [0.504,1.426] | 0.533 | 0.513 |
| rs2292245  | PTPRG    | A | 0.156 | 1.053 | [0.765,1.45]  | 0.751 | 1.272 | [0.733,2.207] | 0.392 | 1.208 | [0.666,2.19]  | 0.533 | 0.680 |
| rs12450550 | EME1     | C | 0.251 | 1.032 | [0.787,1.352] | 0.820 | 1.215 | [0.753,1.962] | 0.425 | 1.178 | [0.703,1.973] | 0.534 | 0.723 |
| rs2014800  | ABCC1    | C | 0.454 | 1.066 | [0.843,1.349] | 0.594 | 1.232 | [0.805,1.886] | 0.337 | 1.156 | [0.732,1.825] | 0.535 | 0.582 |
| rs8191754  | IGF2R    | G | 0.145 | 0.973 | [0.694,1.365] | 0.874 | 0.783 | [0.412,1.487] | 0.454 | 0.804 | [0.405,1.599] | 0.535 | 0.754 |
| rs4839469  | VANGL1   | A | 0.129 | 1.170 | [0.834,1.641] | 0.362 | 0.938 | [0.486,1.811] | 0.850 | 0.802 | [0.399,1.61]  | 0.535 | 0.628 |
| rs6962039  | SLC13A1  | A | 0.277 | 0.880 | [0.673,1.149] | 0.346 | 1.032 | [0.648,1.642] | 0.896 | 1.173 | [0.709,1.94]  | 0.535 | 0.620 |
| rs8058696  | ABCC6    | C | 0.477 | 0.879 | [0.686,1.127] | 0.309 | 1.024 | [0.654,1.603] | 0.917 | 1.165 | [0.719,1.887] | 0.535 | 0.579 |
| rs7577677  | UGT1A10  | A | 0.346 | 1.027 | [0.803,1.314] | 0.832 | 1.195 | [0.764,1.871] | 0.435 | 1.164 | [0.72,1.881]  | 0.535 | 0.733 |
| rs1432793  | SH3TC2   | C | 0.482 | 1.089 | [0.865,1.372] | 0.467 | 0.946 | [0.625,1.432] | 0.793 | 0.868 | [0.556,1.356] | 0.535 | 0.718 |
| rs4886605  | CYP1A1   | T | 0.242 | 1.115 | [0.849,1.464] | 0.435 | 0.941 | [0.57,1.553]  | 0.812 | 0.844 | [0.494,1.442] | 0.535 | 0.694 |
| rs3770603  | ABCB11   | T | 0.104 | 0.851 | [0.564,1.284] | 0.442 | 1.076 | [0.547,2.116] | 0.833 | 1.264 | [0.601,2.658] | 0.536 | 0.707 |
| rs11003127 | MBL2     | C | 0.274 | 1.111 | [0.853,1.446] | 0.435 | 0.942 | [0.58,1.532]  | 0.811 | 0.848 | [0.504,1.428] | 0.536 | 0.695 |
| rs6892398  | RAD50    | C | 0.016 | 0.783 | [0.241,2.549] | 0.685 | 0.373 | [0.043,3.227] | 0.370 | 0.476 | [0.045,5.008] | 0.536 | 0.636 |
| rs877518   | ID3      | A | 0.098 | 1.374 | [0.919,2.055] | 0.122 | 1.075 | [0.518,2.23]  | 0.846 | 0.782 | [0.359,1.704] | 0.537 | 0.302 |
| rs426169   | GSTA4    | T | 0.490 | 0.960 | [0.757,1.218] | 0.739 | 0.829 | [0.538,1.279] | 0.398 | 0.864 | [0.542,1.375] | 0.537 | 0.682 |
| rs17572019 | PPARGC1B | A | 0.078 | 1.092 | [0.725,1.646] | 0.673 | 0.826 | [0.356,1.916] | 0.656 | 0.756 | [0.311,1.836] | 0.537 | 0.806 |
| rs2300697  | SRD5A2   | C | 0.396 | 0.977 | [0.768,1.242] | 0.848 | 0.840 | [0.536,1.316] | 0.446 | 0.860 | [0.532,1.389] | 0.537 | 0.745 |
| rs32950    | MSH3     | G | 0.449 | 1.245 | [0.986,1.571] | 0.065 | 1.079 | [0.704,1.651] | 0.728 | 0.866 | [0.549,1.368] | 0.538 | 0.182 |
| rs6413420  | CYP2E1   | T | 0.049 | 0.528 | [0.282,0.987] | 0.045 | 0.760 | [0.265,2.177] | 0.609 | 1.440 | [0.449,4.616] | 0.540 | 0.129 |
| rs1052133  | CAMK1    | G | 0.234 | 1.148 | [0.869,1.517] | 0.332 | 0.968 | [0.581,1.614] | 0.900 | 0.843 | [0.488,1.456] | 0.540 | 0.602 |
| rs4543     | CYP11B2  | A | 0.105 | 1.208 | [0.826,1.766] | 0.329 | 0.956 | [0.474,1.93]  | 0.901 | 0.792 | [0.374,1.674] | 0.541 | 0.599 |
| rs361525   | TNF      | A | 0.054 | 1.228 | [0.749,2.013] | 0.416 | 1.587 | [0.746,3.378] | 0.230 | 1.293 | [0.567,2.947] | 0.541 | 0.406 |
| rs135539   | PPARA    | G | 0.465 | 1.006 | [0.797,1.269] | 0.959 | 0.872 | [0.569,1.337] | 0.531 | 0.867 | [0.548,1.37]  | 0.541 | 0.814 |
| rs2011713  | PCGF2    | A | 0.071 | 0.726 | [0.445,1.185] | 0.200 | 0.512 | [0.177,1.481] | 0.217 | 0.706 | [0.23,2.167]  | 0.543 | 0.238 |
| rs5186     | AGTR1    | C | 0.249 | 0.893 | [0.681,1.171] | 0.413 | 0.752 | [0.448,1.263] | 0.281 | 0.843 | [0.485,1.463] | 0.543 | 0.444 |
| rs1469149  | CSF2     | C | 0.370 | 0.922 | [0.717,1.186] | 0.526 | 1.075 | [0.679,1.703] | 0.757 | 1.167 | [0.71,1.918]  | 0.543 | 0.759 |
| rs1801243  | ATP7B    | G | 0.448 | 0.791 | [0.621,1.008] | 0.058 | 0.915 | [0.59,1.42]   | 0.693 | 1.157 | [0.722,1.855] | 0.544 | 0.164 |
| rs1805011  | IL4R     | C | 0.203 | 0.944 | [0.682,1.307] | 0.728 | 1.136 | [0.655,1.971] | 0.650 | 1.204 | [0.661,2.193] | 0.545 | 0.828 |
| rs1143634  | IL1B     | T | 0.210 | 0.974 | [0.737,1.287] | 0.853 | 0.819 | [0.484,1.387] | 0.458 | 0.841 | [0.48,1.474]  | 0.546 | 0.756 |

|            |            |   |       |       |               |       |       |               |       |       |               |       |       |
|------------|------------|---|-------|-------|---------------|-------|-------|---------------|-------|-------|---------------|-------|-------|
| rs10018284 | Intergenic | C | 0.337 | 1.068 | [0.833,1.37]  | 0.603 | 0.917 | [0.577,1.458] | 0.715 | 0.859 | [0.523,1.409] | 0.546 | 0.792 |
| rs2305799  | ACP5       | T | 0.101 | 1.005 | [0.68,1.484]  | 0.981 | 0.782 | [0.363,1.682] | 0.529 | 0.778 | [0.345,1.758] | 0.546 | 0.816 |
| rs891507   | CDK5       | T | 0.138 | 0.896 | [0.636,1.261] | 0.528 | 1.097 | [0.597,2.015] | 0.767 | 1.224 | [0.634,2.363] | 0.547 | 0.761 |
| rs1760209  | DPYD       | T | 0.179 | 1.202 | [0.893,1.618] | 0.226 | 1.421 | [0.854,2.365] | 0.176 | 1.183 | [0.685,2.042] | 0.547 | 0.241 |
| rs17064    | ABCB1      | T | 0.076 | 0.888 | [0.568,1.389] | 0.603 | 1.122 | [0.566,2.226] | 0.742 | 1.263 | [0.591,2.702] | 0.547 | 0.803 |
| rs1736565  | FMO6       | C | 0.406 | 0.884 | [0.697,1.121] | 0.309 | 1.019 | [0.662,1.568] | 0.931 | 1.153 | [0.726,1.832] | 0.547 | 0.581 |
| rs488133   | ESR1       | T | 0.262 | 0.953 | [0.732,1.241] | 0.722 | 1.115 | [0.692,1.796] | 0.654 | 1.170 | [0.702,1.95]  | 0.547 | 0.827 |
| rs2762934  | CYP24A1    | A | 0.171 | 1.169 | [0.865,1.58]  | 0.309 | 0.968 | [0.543,1.726] | 0.913 | 0.828 | [0.449,1.529] | 0.547 | 0.578 |
| rs4792147  | ALOX15B    | A | 0.445 | 0.835 | [0.656,1.063] | 0.143 | 0.966 | [0.62,1.506]  | 0.879 | 1.157 | [0.719,1.863] | 0.548 | 0.341 |
| rs730566   | ATRIP      | T | 0.262 | 0.883 | [0.672,1.161] | 0.374 | 0.746 | [0.445,1.25]  | 0.266 | 0.844 | [0.486,1.466] | 0.548 | 0.407 |
| rs541463   | PGR        | A | 0.135 | 1.166 | [0.832,1.634] | 0.372 | 1.417 | [0.782,2.569] | 0.251 | 1.215 | [0.643,2.298] | 0.548 | 0.398 |
| rs9529     | CCND3      | A | 0.233 | 0.966 | [0.729,1.28]  | 0.808 | 1.136 | [0.693,1.863] | 0.612 | 1.177 | [0.691,2.004] | 0.549 | 0.835 |
| rs11995670 | ADRB3      | G | 0.319 | 0.845 | [0.653,1.095] | 0.202 | 0.985 | [0.619,1.567] | 0.949 | 1.165 | [0.707,1.922] | 0.549 | 0.441 |
| rs3790433  | LEPR       | A | 0.352 | 1.188 | [0.92,1.534]  | 0.186 | 1.018 | [0.633,1.637] | 0.943 | 0.856 | [0.516,1.422] | 0.549 | 0.414 |
| rs1413233  | DPYD       | C | 0.013 | 1.043 | [0.266,4.085] | 0.952 | 0.496 | [0.055,4.45]  | 0.531 | 0.475 | [0.042,5.415] | 0.549 | 0.814 |
| rs419129   | GSTA4      | T | 0.487 | 1.124 | [0.887,1.424] | 0.335 | 1.293 | [0.842,1.987] | 0.240 | 1.151 | [0.726,1.825] | 0.549 | 0.361 |
| rs6911817  | PPARD      | T | 0.063 | 0.746 | [0.425,1.31]  | 0.308 | 0.532 | [0.192,1.478] | 0.226 | 0.713 | [0.236,2.156] | 0.549 | 0.326 |
| rs524      | PPP1R15A   | A | 0.298 | 0.944 | [0.723,1.234] | 0.674 | 0.804 | [0.492,1.313] | 0.383 | 0.851 | [0.502,1.443] | 0.549 | 0.652 |
| rs173537   | HERPUD1    | C | 0.333 | 1.115 | [0.864,1.44]  | 0.403 | 0.959 | [0.603,1.524] | 0.858 | 0.860 | [0.523,1.412] | 0.550 | 0.674 |
| rs9840993  | MYLK       | G | 0.069 | 0.961 | [0.553,1.67]  | 0.888 | 0.705 | [0.28,1.78]   | 0.460 | 0.734 | [0.266,2.024] | 0.550 | 0.760 |
| rs487848   | POLQ       | A | 0.078 | 0.928 | [0.573,1.503] | 0.761 | 1.213 | [0.543,2.71]  | 0.637 | 1.307 | [0.543,3.149] | 0.550 | 0.835 |
| rs1071676  | IL1B       | C | 0.210 | 0.978 | [0.74,1.293]  | 0.878 | 0.825 | [0.488,1.395] | 0.472 | 0.843 | [0.481,1.476] | 0.550 | 0.771 |
| rs610611   | MRE11A     | A | 0.297 | 0.981 | [0.757,1.271] | 0.883 | 1.141 | [0.72,1.807]  | 0.575 | 1.163 | [0.709,1.909] | 0.550 | 0.833 |
| rs3850997  | TNFRSF17   | T | 0.297 | 1.047 | [0.804,1.363] | 0.736 | 1.217 | [0.769,1.925] | 0.401 | 1.163 | [0.709,1.908] | 0.551 | 0.686 |
| rs1322055  | TNFSF8     | C | 0.121 | 0.794 | [0.548,1.151] | 0.224 | 0.986 | [0.513,1.892] | 0.965 | 1.241 | [0.611,2.52]  | 0.551 | 0.475 |
| rs3093662  | TNF        | G | 0.067 | 1.354 | [0.853,2.152] | 0.199 | 1.711 | [0.842,3.476] | 0.138 | 1.263 | [0.586,2.723] | 0.551 | 0.198 |
| rs1048804  | NRP1       | C | 0.293 | 0.978 | [0.756,1.266] | 0.867 | 0.839 | [0.524,1.343] | 0.465 | 0.858 | [0.518,1.42]  | 0.551 | 0.764 |
| rs7708626  | RAD50      | A | 0.031 | 2.004 | [0.938,4.278] | 0.073 | 1.352 | [0.413,4.434] | 0.618 | 0.675 | [0.185,2.467] | 0.552 | 0.196 |
| rs1549758  | NOS3       | T | 0.266 | 1.195 | [0.913,1.565] | 0.195 | 1.016 | [0.614,1.681] | 0.951 | 0.850 | [0.497,1.454] | 0.553 | 0.428 |
| rs6428830  | HSD3B1     | A | 0.246 | 1.103 | [0.83,1.464]  | 0.500 | 0.927 | [0.541,1.588] | 0.782 | 0.841 | [0.474,1.492] | 0.553 | 0.743 |
| rs10248420 | ABCB1      | G | 0.218 | 1.205 | [0.89,1.632]  | 0.227 | 1.422 | [0.859,2.356] | 0.171 | 1.180 | [0.683,2.04]  | 0.554 | 0.236 |
| rs4303     | ACE        | T | 0.019 | 0.838 | [0.29,2.423]  | 0.744 | 0.409 | [0.044,3.804] | 0.432 | 0.488 | [0.046,5.234] | 0.554 | 0.712 |
| rs1202170  | ABCB1      | G | 0.490 | 1.034 | [0.81,1.321]  | 0.788 | 1.189 | [0.775,1.826] | 0.428 | 1.150 | [0.723,1.828] | 0.555 | 0.721 |
| rs17779352 | AHR        | C | 0.077 | 0.729 | [0.453,1.175] | 0.195 | 0.950 | [0.426,2.116] | 0.899 | 1.302 | [0.542,3.125] | 0.555 | 0.431 |
| rs7514102  | PROK1      | A | 0.422 | 0.867 | [0.682,1.102] | 0.245 | 0.998 | [0.646,1.539] | 0.991 | 1.150 | [0.722,1.833] | 0.557 | 0.503 |
| rs560096   | IGHMBP2    | T | 0.207 | 0.882 | [0.659,1.182] | 0.401 | 1.038 | [0.631,1.709] | 0.882 | 1.177 | [0.684,2.025] | 0.557 | 0.679 |
| rs3733549  | BMP3       | A | 0.072 | 1.173 | [0.759,1.812] | 0.472 | 1.474 | [0.731,2.973] | 0.278 | 1.257 | [0.586,2.695] | 0.557 | 0.477 |
| rs2738258  | CYP3A4     | A | 0.059 | 1.295 | [0.72,2.329]  | 0.388 | 0.952 | [0.377,2.405] | 0.917 | 0.735 | [0.263,2.053] | 0.557 | 0.672 |
| rs3219489  | MUTYH      | C | 0.247 | 0.872 | [0.668,1.139] | 0.315 | 1.013 | [0.64,1.601]  | 0.958 | 1.161 | [0.706,1.91]  | 0.557 | 0.592 |
| rs3730477  | POLL       | T | 0.171 | 0.861 | [0.623,1.19]  | 0.366 | 1.043 | [0.576,1.888] | 0.890 | 1.210 | [0.64,2.289]  | 0.557 | 0.643 |
| rs165815   | ARVCF      | C | 0.234 | 1.281 | [0.971,1.689] | 0.080 | 1.088 | [0.652,1.815] | 0.746 | 0.850 | [0.493,1.464] | 0.557 | 0.216 |

|            |          |   |       |       |               |       |       |               |       |       |               |       |       |
|------------|----------|---|-------|-------|---------------|-------|-------|---------------|-------|-------|---------------|-------|-------|
| rs2297809  | CYP4B1   | A | 0.152 | 0.777 | [0.548,1.103] | 0.158 | 0.623 | [0.311,1.245] | 0.180 | 0.801 | [0.382,1.681] | 0.558 | 0.181 |
| rs7805658  | SHFM1    | A | 0.388 | 0.795 | [0.617,1.023] | 0.075 | 0.684 | [0.429,1.091] | 0.111 | 0.861 | [0.523,1.419] | 0.558 | 0.081 |
| rs776741   | CYP3A5   | C | 0.100 | 0.985 | [0.629,1.541] | 0.946 | 1.237 | [0.616,2.483] | 0.549 | 1.257 | [0.585,2.697] | 0.558 | 0.824 |
| rs937369   | ABCC1    | A | 0.454 | 1.075 | [0.85,1.359]  | 0.549 | 1.232 | [0.804,1.887] | 0.338 | 1.146 | [0.726,1.81]  | 0.558 | 0.566 |
| rs3733182  | STK32B   | C | 0.154 | 0.972 | [0.711,1.329] | 0.860 | 0.803 | [0.439,1.469] | 0.476 | 0.826 | [0.435,1.568] | 0.559 | 0.773 |
| rs10499926 | SHFM1    | C | 0.388 | 0.795 | [0.618,1.024] | 0.076 | 0.685 | [0.43,1.093]  | 0.112 | 0.862 | [0.523,1.42]  | 0.559 | 0.082 |
| rs35592    | ABCC1    | C | 0.280 | 0.879 | [0.672,1.151] | 0.350 | 1.022 | [0.643,1.625] | 0.927 | 1.162 | [0.702,1.922] | 0.559 | 0.630 |
| rs10261833 | SHFM1    | C | 0.180 | 1.152 | [0.855,1.551] | 0.352 | 0.964 | [0.55,1.689]  | 0.897 | 0.837 | [0.46,1.523]  | 0.559 | 0.627 |
| rs506008   | GSTM4    | A | 0.173 | 0.861 | [0.61,1.215]  | 0.394 | 1.040 | [0.581,1.861] | 0.896 | 1.208 | [0.641,2.275] | 0.560 | 0.674 |
| rs2839668  | MYO3A    | G | 0.084 | 1.000 | [0.659,1.517] | 0.999 | 1.267 | [0.604,2.656] | 0.532 | 1.267 | [0.572,2.808] | 0.560 | 0.819 |
| rs4251710  | TAF15    | C | 0.118 | 1.021 | [0.684,1.524] | 0.919 | 0.808 | [0.387,1.685] | 0.569 | 0.791 | [0.359,1.743] | 0.561 | 0.837 |
| rs12721613 | NR1I2    | T | 0.020 | 0.630 | [0.238,1.667] | 0.352 | 0.981 | [0.273,3.521] | 0.977 | 1.557 | [0.35,6.922]  | 0.561 | 0.645 |
| rs5987     | F13A1    | A | 0.051 | 0.794 | [0.46,1.369]  | 0.407 | 0.550 | [0.171,1.768] | 0.316 | 0.693 | [0.201,2.39]  | 0.561 | 0.462 |
| rs1129923  | DUSP23   | A | 0.080 | 0.789 | [0.502,1.24]  | 0.305 | 1.014 | [0.465,2.214] | 0.971 | 1.286 | [0.55,3.006]  | 0.562 | 0.582 |
| rs1130496  | PTPRN2   | A | 0.393 | 0.752 | [0.583,0.969] | 0.028 | 0.866 | [0.556,1.35]  | 0.526 | 1.153 | [0.713,1.862] | 0.562 | 0.084 |
| rs1611755  | SPRR1A   | T | 0.434 | 0.870 | [0.684,1.107] | 0.258 | 0.757 | [0.488,1.175] | 0.214 | 0.870 | [0.543,1.394] | 0.562 | 0.289 |
| rs3749228  | CHRD     | G | 0.068 | 1.362 | [0.889,2.086] | 0.156 | 1.042 | [0.443,2.455] | 0.924 | 0.765 | [0.31,1.891]  | 0.562 | 0.364 |
| rs608452   | MRE11A   | T | 0.019 | 0.694 | [0.245,1.971] | 0.493 | 0.357 | [0.044,2.917] | 0.337 | 0.515 | [0.054,4.881] | 0.563 | 0.529 |
| rs2301241  | TXN      | C | 0.396 | 0.964 | [0.759,1.224] | 0.762 | 0.840 | [0.544,1.297] | 0.432 | 0.872 | [0.547,1.39]  | 0.564 | 0.720 |
| rs1004588  | DGKG     | C | 0.485 | 1.021 | [0.811,1.285] | 0.861 | 1.166 | [0.765,1.779] | 0.475 | 1.143 | [0.726,1.798] | 0.564 | 0.772 |
| rs911605   | TNFSF8   | G | 0.254 | 0.885 | [0.678,1.155] | 0.368 | 0.754 | [0.452,1.258] | 0.279 | 0.852 | [0.493,1.471] | 0.565 | 0.414 |
| rs3172469  | BCL6     | C | 0.292 | 1.009 | [0.78,1.305]  | 0.946 | 1.163 | [0.74,1.827]  | 0.512 | 1.153 | [0.709,1.874] | 0.566 | 0.806 |
| rs2280789  | CCL5     | C | 0.149 | 1.088 | [0.785,1.508] | 0.613 | 0.894 | [0.475,1.682] | 0.728 | 0.822 | [0.42,1.608]  | 0.566 | 0.806 |
| rs4803418  | CYP2B6   | G | 0.288 | 0.934 | [0.713,1.223] | 0.618 | 0.795 | [0.474,1.334] | 0.385 | 0.851 | [0.491,1.477] | 0.567 | 0.636 |
| rs2295155  | CARD10   | A | 0.092 | 0.860 | [0.568,1.302] | 0.475 | 0.660 | [0.282,1.547] | 0.340 | 0.768 | [0.311,1.896] | 0.567 | 0.526 |
| rs2228526  | ERCC6    | G | 0.198 | 0.952 | [0.709,1.278] | 0.742 | 1.121 | [0.665,1.89]  | 0.669 | 1.178 | [0.672,2.063] | 0.568 | 0.843 |
| rs1861887  | GSTZ1    | T | 0.183 | 1.055 | [0.784,1.42]  | 0.723 | 0.885 | [0.502,1.56]  | 0.672 | 0.839 | [0.458,1.534] | 0.568 | 0.839 |
| rs1045020  | SLC22A5  | T | 0.117 | 1.017 | [0.7,1.478]   | 0.930 | 0.809 | [0.386,1.695] | 0.575 | 0.796 | [0.363,1.743] | 0.568 | 0.843 |
| rs2283512  | ABCC1    | T | 0.374 | 1.015 | [0.79,1.303]  | 0.909 | 1.165 | [0.751,1.806] | 0.496 | 1.148 | [0.715,1.843] | 0.568 | 0.793 |
| rs1801058  | GRK4     | T | 0.378 | 0.869 | [0.681,1.108] | 0.257 | 0.996 | [0.643,1.542] | 0.984 | 1.146 | [0.716,1.835] | 0.570 | 0.520 |
| rs2234962  | BAG3     | C | 0.163 | 1.157 | [0.847,1.58]  | 0.360 | 0.960 | [0.524,1.761] | 0.896 | 0.830 | [0.437,1.578] | 0.570 | 0.636 |
| rs35599    | ABCC1    | C | 0.111 | 1.127 | [0.784,1.621] | 0.519 | 1.362 | [0.743,2.498] | 0.318 | 1.209 | [0.627,2.33]  | 0.571 | 0.537 |
| rs9282564  | ABCB1    | G | 0.093 | 0.848 | [0.564,1.277] | 0.430 | 0.662 | [0.296,1.483] | 0.316 | 0.780 | [0.331,1.842] | 0.571 | 0.483 |
| rs1614984  | TP53     | T | 0.437 | 0.974 | [0.768,1.235] | 0.828 | 0.852 | [0.555,1.31]  | 0.466 | 0.875 | [0.552,1.389] | 0.572 | 0.761 |
| rs3176123  | THBD     | C | 0.164 | 1.058 | [0.772,1.45]  | 0.726 | 1.258 | [0.719,2.2]   | 0.422 | 1.189 | [0.652,2.165] | 0.572 | 0.705 |
| rs3914142  | ACBD3    | C | 0.459 | 0.920 | [0.728,1.162] | 0.485 | 0.807 | [0.527,1.236] | 0.324 | 0.877 | [0.555,1.385] | 0.573 | 0.524 |
| rs1873196  | TLR1     | T | 0.028 | 0.849 | [0.398,1.813] | 0.672 | 0.536 | [0.12,2.39]   | 0.414 | 0.632 | [0.128,3.125] | 0.573 | 0.677 |
| rs2107356  | IL4R     | A | 0.365 | 1.009 | [0.791,1.287] | 0.941 | 1.154 | [0.747,1.782] | 0.518 | 1.144 | [0.717,1.825] | 0.574 | 0.811 |
| rs17780143 | MAP4K5   | A | 0.049 | 1.377 | [0.816,2.325] | 0.231 | 1.787 | [0.769,4.153] | 0.178 | 1.297 | [0.524,3.214] | 0.574 | 0.252 |
| rs6768093  | ATR      | A | 0.388 | 0.820 | [0.641,1.049] | 0.115 | 0.941 | [0.601,1.474] | 0.792 | 1.148 | [0.709,1.858] | 0.574 | 0.288 |
| rs2089891  | PPP1R15B | G | 0.082 | 0.955 | [0.629,1.448] | 0.828 | 0.739 | [0.318,1.717] | 0.482 | 0.774 | [0.316,1.895] | 0.575 | 0.773 |

|            |           |   |       |       |               |       |       |               |       |       |               |       |       |
|------------|-----------|---|-------|-------|---------------|-------|-------|---------------|-------|-------|---------------|-------|-------|
| rs6102     | SERPINB2  | G | 0.208 | 1.434 | [1.084,1.897] | 0.012 | 1.662 | [1.024,2.697] | 0.040 | 1.159 | [0.691,1.943] | 0.575 | 0.011 |
| rs2242578  | GLI1      | G | 0.383 | 0.929 | [0.728,1.186] | 0.556 | 1.062 | [0.688,1.64]  | 0.786 | 1.143 | [0.716,1.824] | 0.576 | 0.788 |
| rs3779620  | PBK       | G | 0.138 | 0.823 | [0.573,1.182] | 0.292 | 0.994 | [0.545,1.815] | 0.985 | 1.208 | [0.623,2.341] | 0.576 | 0.570 |
| rs11595876 | MBL2      | C | 0.055 | 1.122 | [0.679,1.855] | 0.653 | 0.837 | [0.318,2.203] | 0.719 | 0.746 | [0.267,2.084] | 0.576 | 0.825 |
| rs2000813  | LIPG      | T | 0.267 | 1.129 | [0.871,1.464] | 0.358 | 0.974 | [0.598,1.587] | 0.916 | 0.863 | [0.513,1.449] | 0.577 | 0.637 |
| rs6512087  | CIB3      | C | 0.204 | 0.989 | [0.746,1.313] | 0.941 | 0.844 | [0.502,1.419] | 0.523 | 0.853 | [0.489,1.49]  | 0.577 | 0.815 |
| rs215059   | ABCC1     | T | 0.132 | 1.208 | [0.865,1.688] | 0.267 | 0.997 | [0.527,1.886] | 0.992 | 0.825 | [0.42,1.622]  | 0.577 | 0.532 |
| rs947894   | GSTP1     | G | 0.365 | 1.065 | [0.832,1.362] | 0.618 | 0.926 | [0.586,1.464] | 0.743 | 0.870 | [0.533,1.419] | 0.577 | 0.816 |
| rs164938   | TATDN2    | T | 0.456 | 1.008 | [0.8,1.271]   | 0.946 | 1.145 | [0.753,1.741] | 0.525 | 1.136 | [0.725,1.781] | 0.578 | 0.817 |
| rs3761936  | AP4B1     | C | 0.187 | 1.394 | [1.042,1.865] | 0.025 | 1.178 | [0.67,2.07]   | 0.569 | 0.845 | [0.465,1.533] | 0.579 | 0.079 |
| rs31473    | CSF2      | T | 0.299 | 1.053 | [0.812,1.365] | 0.699 | 1.209 | [0.767,1.906] | 0.413 | 1.149 | [0.704,1.876] | 0.579 | 0.690 |
| rs917394   | NPC2      | T | 0.374 | 0.981 | [0.769,1.253] | 0.879 | 0.856 | [0.545,1.344] | 0.499 | 0.872 | [0.538,1.414] | 0.580 | 0.794 |
| rs2072360  | FOXM1     | G | 0.231 | 1.088 | [0.824,1.436] | 0.552 | 0.934 | [0.563,1.549] | 0.792 | 0.859 | [0.501,1.473] | 0.580 | 0.786 |
| rs3826007  | BCL2A1    | A | 0.238 | 1.062 | [0.811,1.392] | 0.661 | 0.911 | [0.547,1.517] | 0.720 | 0.858 | [0.498,1.478] | 0.580 | 0.831 |
| rs2075724  | CSF2RB    | T | 0.483 | 1.197 | [0.94,1.524]  | 0.144 | 1.052 | [0.686,1.612] | 0.817 | 0.878 | [0.555,1.391] | 0.581 | 0.343 |
| rs2307492  | FMO2      | C | 0.110 | 0.940 | [0.643,1.374] | 0.749 | 1.141 | [0.607,2.142] | 0.682 | 1.214 | [0.611,2.413] | 0.581 | 0.854 |
| rs1801279  | NAT2      | A | 0.011 | 2.003 | [0.65,6.174]  | 0.226 | 1.046 | [0.119,9.228] | 0.967 | 0.522 | [0.052,5.23]  | 0.581 | 0.477 |
| rs157580   | TOMM40    | G | 0.334 | 0.921 | [0.717,1.181] | 0.515 | 1.052 | [0.677,1.636] | 0.821 | 1.143 | [0.711,1.836] | 0.581 | 0.768 |
| rs2972388  | CDK7      | G | 0.428 | 0.976 | [0.774,1.231] | 0.839 | 1.109 | [0.727,1.69]  | 0.632 | 1.136 | [0.723,1.785] | 0.581 | 0.859 |
| rs3917991  | CSF3R     | C | 0.040 | 1.130 | [0.589,2.169] | 0.713 | 0.802 | [0.26,2.471]  | 0.700 | 0.709 | [0.209,2.404] | 0.581 | 0.849 |
| rs1056522  | CHST13    | T | 0.337 | 1.133 | [0.891,1.441] | 0.310 | 0.992 | [0.638,1.543] | 0.972 | 0.876 | [0.547,1.403] | 0.582 | 0.587 |
| rs2853563  | VDR       | A | 0.064 | 1.285 | [0.802,2.059] | 0.298 | 1.002 | [0.439,2.288] | 0.996 | 0.780 | [0.323,1.887] | 0.582 | 0.574 |
| rs757158   | PON1      | C | 0.482 | 0.841 | [0.656,1.079] | 0.173 | 0.734 | [0.467,1.154] | 0.181 | 0.873 | [0.537,1.418] | 0.582 | 0.202 |
| rs2227931  | ATR       | C | 0.350 | 1.199 | [0.932,1.541] | 0.158 | 1.374 | [0.872,2.164] | 0.171 | 1.146 | [0.704,1.865] | 0.583 | 0.184 |
| rs552976   | ABCB11    | T | 0.336 | 1.147 | [0.902,1.458] | 0.265 | 1.304 | [0.849,2.004] | 0.225 | 1.138 | [0.718,1.803] | 0.583 | 0.305 |
| rs484066   | ABCB11    | T | 0.395 | 1.118 | [0.885,1.413] | 0.350 | 1.267 | [0.837,1.919] | 0.263 | 1.133 | [0.725,1.772] | 0.583 | 0.392 |
| rs17151919 | LEP       | A | 0.014 | 1.264 | [0.413,3.868] | 0.681 | 0.660 | [0.076,5.742] | 0.707 | 0.522 | [0.051,5.315] | 0.583 | 0.840 |
| rs5896     | F2        | T | 0.136 | 1.158 | [0.827,1.621] | 0.394 | 1.381 | [0.766,2.489] | 0.283 | 1.193 | [0.636,2.238] | 0.583 | 0.444 |
| rs4525938  | DCK       | T | 0.119 | 0.802 | [0.503,1.279] | 0.353 | 0.629 | [0.286,1.385] | 0.250 | 0.785 | [0.33,1.865]  | 0.583 | 0.377 |
| rs2037483  | HUS1      | A | 0.496 | 0.929 | [0.734,1.175] | 0.537 | 1.056 | [0.688,1.622] | 0.803 | 1.137 | [0.718,1.801] | 0.584 | 0.781 |
| rs1962     | THBD      | C | 0.264 | 1.096 | [0.832,1.443] | 0.514 | 1.268 | [0.779,2.064] | 0.339 | 1.157 | [0.686,1.95]  | 0.584 | 0.555 |
| rs584531   | MRE11A    | G | 0.323 | 1.007 | [0.785,1.293] | 0.955 | 1.150 | [0.74,1.787]  | 0.534 | 1.142 | [0.71,1.837]  | 0.584 | 0.824 |
| rs828059   | DPYD      | G | 0.179 | 1.226 | [0.912,1.65]  | 0.177 | 1.428 | [0.858,2.376] | 0.170 | 1.164 | [0.675,2.009] | 0.585 | 0.204 |
| rs828057   | DPYD      | T | 0.179 | 1.224 | [0.91,1.646]  | 0.182 | 1.425 | [0.856,2.371] | 0.173 | 1.164 | [0.675,2.01]  | 0.585 | 0.209 |
| rs2234900  | IL4R      | C | 0.206 | 0.875 | [0.642,1.192] | 0.397 | 1.028 | [0.604,1.75]  | 0.919 | 1.175 | [0.659,2.094] | 0.585 | 0.682 |
| rs3744644  | SCARF1    | G | 0.055 | 1.670 | [0.925,3.017] | 0.089 | 1.235 | [0.452,3.374] | 0.681 | 0.739 | [0.249,2.194] | 0.586 | 0.233 |
| rs17197552 | PPP2R3A   | G | 0.268 | 0.914 | [0.706,1.184] | 0.497 | 1.049 | [0.664,1.656] | 0.839 | 1.147 | [0.701,1.877] | 0.586 | 0.759 |
| rs228851   | NFATC2    | T | 0.416 | 0.871 | [0.683,1.11]  | 0.264 | 0.993 | [0.638,1.545] | 0.976 | 1.140 | [0.71,1.833]  | 0.587 | 0.532 |
| rs1014136  | STARD3NL  | C | 0.232 | 0.956 | [0.723,1.264] | 0.753 | 1.110 | [0.674,1.827] | 0.683 | 1.160 | [0.678,1.987] | 0.587 | 0.858 |
| rs1470414  | PASK      | A | 0.298 | 0.941 | [0.728,1.216] | 0.640 | 1.079 | [0.68,1.712]  | 0.747 | 1.147 | [0.698,1.884] | 0.588 | 0.831 |
| rs1980499  | LOC728383 | C | 0.435 | 1.113 | [0.868,1.426] | 0.399 | 1.272 | [0.81,1.997]  | 0.297 | 1.143 | [0.705,1.854] | 0.588 | 0.452 |

|            |          |   |       |       |               |       |       |               |       |       |               |       |       |
|------------|----------|---|-------|-------|---------------|-------|-------|---------------|-------|-------|---------------|-------|-------|
| rs874305   | IGF1R    | A | 0.409 | 0.858 | [0.674,1.093] | 0.215 | 0.975 | [0.634,1.499] | 0.909 | 1.137 | [0.715,1.808] | 0.589 | 0.463 |
| rs434473   | ALOX12   | G | 0.386 | 0.939 | [0.737,1.198] | 0.615 | 1.068 | [0.693,1.648] | 0.765 | 1.137 | [0.713,1.813] | 0.589 | 0.822 |
| rs2238783  | ARVCF    | G | 0.397 | 1.160 | [0.916,1.468] | 0.217 | 1.021 | [0.662,1.576] | 0.925 | 0.880 | [0.554,1.4]   | 0.590 | 0.466 |
| rs2515641  | CYP2E1   | T | 0.212 | 0.826 | [0.587,1.164] | 0.275 | 0.687 | [0.367,1.284] | 0.239 | 0.831 | [0.424,1.629] | 0.590 | 0.320 |
| rs8940     | CAV2     | G | 0.171 | 1.225 | [0.901,1.664] | 0.195 | 1.037 | [0.587,1.832] | 0.901 | 0.847 | [0.462,1.552] | 0.590 | 0.431 |
| rs8032477  | IGF1R    | C | 0.457 | 1.012 | [0.796,1.287] | 0.920 | 0.888 | [0.569,1.387] | 0.602 | 0.877 | [0.545,1.413] | 0.590 | 0.860 |
| rs1056663  | HUS1     | A | 0.494 | 0.935 | [0.739,1.184] | 0.579 | 1.062 | [0.691,1.631] | 0.785 | 1.135 | [0.716,1.799] | 0.591 | 0.806 |
| rs11706052 | IMPDH2   | G | 0.088 | 0.834 | [0.544,1.278] | 0.404 | 0.646 | [0.27,1.547]  | 0.327 | 0.775 | [0.307,1.961] | 0.591 | 0.474 |
| rs2305367  | SLC28A1  | T | 0.388 | 0.977 | [0.77,1.239]  | 0.848 | 1.105 | [0.728,1.677] | 0.640 | 1.131 | [0.721,1.772] | 0.592 | 0.866 |
| rs697221   | DDIT3    | A | 0.177 | 0.779 | [0.568,1.069] | 0.122 | 0.918 | [0.528,1.596] | 0.763 | 1.179 | [0.646,2.15]  | 0.592 | 0.300 |
| rs1884614  | HNF4a    | T | 0.195 | 0.859 | [0.64,1.152]  | 0.310 | 1.001 | [0.595,1.684] | 0.997 | 1.166 | [0.665,2.044] | 0.592 | 0.591 |
| rs10479008 | RAD50    | A | 0.033 | 1.787 | [0.836,3.82]  | 0.134 | 1.252 | [0.382,4.108] | 0.710 | 0.701 | [0.19,2.578]  | 0.593 | 0.323 |
| rs3093153  | CYP4F2   | T | 0.058 | 0.939 | [0.574,1.536] | 0.802 | 1.197 | [0.526,2.723] | 0.669 | 1.274 | [0.524,3.098] | 0.593 | 0.866 |
| rs696217   | GHRL     | T | 0.065 | 0.814 | [0.507,1.309] | 0.397 | 0.607 | [0.218,1.69]  | 0.339 | 0.745 | [0.253,2.195] | 0.593 | 0.479 |
| rs743534   | CYP2E1   | G | 0.209 | 0.872 | [0.624,1.219] | 0.424 | 0.729 | [0.395,1.346] | 0.312 | 0.836 | [0.432,1.615] | 0.593 | 0.479 |
| rs2299257  | PON1     | C | 0.461 | 0.895 | [0.71,1.128]  | 0.345 | 0.791 | [0.52,1.205]  | 0.275 | 0.885 | [0.563,1.389] | 0.594 | 0.400 |
| rs3733890  | BHMT     | A | 0.301 | 0.949 | [0.736,1.225] | 0.689 | 1.085 | [0.686,1.718] | 0.726 | 1.143 | [0.698,1.873] | 0.594 | 0.849 |
| rs117854   | ABCC1    | C | 0.344 | 1.104 | [0.849,1.436] | 0.461 | 0.960 | [0.592,1.556] | 0.867 | 0.869 | [0.518,1.458] | 0.595 | 0.734 |
| rs1800822  | FMO3     | T | 0.068 | 1.152 | [0.737,1.8]   | 0.535 | 0.887 | [0.355,2.214] | 0.797 | 0.770 | [0.294,2.018] | 0.595 | 0.778 |
| rs3218012  | CDKN2A   | T | 0.436 | 1.061 | [0.834,1.35]  | 0.630 | 0.935 | [0.605,1.444] | 0.761 | 0.881 | [0.552,1.406] | 0.596 | 0.831 |
| rs4994     | ADRB3    | C | 0.094 | 0.959 | [0.632,1.457] | 0.845 | 1.181 | [0.582,2.397] | 0.645 | 1.231 | [0.57,2.658]  | 0.596 | 0.869 |
| rs1149901  | FLJ45983 | T | 0.229 | 1.091 | [0.838,1.42]  | 0.517 | 0.943 | [0.567,1.568] | 0.820 | 0.864 | [0.503,1.485] | 0.597 | 0.772 |
| rs1358312  | PPP3CA   | A | 0.180 | 0.932 | [0.676,1.287] | 0.671 | 0.787 | [0.437,1.417] | 0.424 | 0.844 | [0.449,1.586] | 0.598 | 0.691 |
| rs2271010  | ATF6     | C | 0.129 | 1.170 | [0.837,1.634] | 0.359 | 1.379 | [0.779,2.44]  | 0.270 | 1.179 | [0.639,2.174] | 0.598 | 0.412 |
| rs853790   | ABCB11   | T | 0.489 | 1.137 | [0.9,1.436]   | 0.283 | 1.006 | [0.659,1.536] | 0.979 | 0.885 | [0.562,1.394] | 0.598 | 0.558 |
| rs5769     | TBXAS1   | G | 0.010 | 1.199 | [0.382,3.759] | 0.756 | 0.677 | [0.094,4.878] | 0.699 | 0.565 | [0.067,4.738] | 0.599 | 0.865 |
| rs954619   | CCND1    | T | 0.034 | 2.125 | [1.112,4.061] | 0.023 | 1.556 | [0.524,4.621] | 0.426 | 0.732 | [0.23,2.336]  | 0.599 | 0.069 |
| rs2069830  | IL6      | T | 0.016 | 0.569 | [0.176,1.839] | 0.346 | 0.905 | [0.224,3.661] | 0.889 | 1.590 | [0.28,9.036]  | 0.601 | 0.641 |
| rs483536   | NFKBIE   | T | 0.339 | 1.070 | [0.838,1.367] | 0.586 | 0.942 | [0.603,1.473] | 0.793 | 0.880 | [0.545,1.42]  | 0.601 | 0.813 |
| rs472344   | ANKRD49  | T | 0.490 | 1.012 | [0.805,1.272] | 0.918 | 0.899 | [0.594,1.36]  | 0.615 | 0.888 | [0.57,1.384]  | 0.601 | 0.867 |
| rs1800896  | IL10     | G | 0.436 | 0.945 | [0.746,1.197] | 0.640 | 0.834 | [0.539,1.292] | 0.417 | 0.883 | [0.553,1.41]  | 0.601 | 0.674 |
| rs8187737  | SLC28A1  | T | 0.014 | 1.101 | [0.391,3.103] | 0.855 | 0.613 | [0.077,4.856] | 0.643 | 0.557 | [0.062,5.024] | 0.602 | 0.873 |
| rs6180     | GHR      | C | 0.451 | 0.874 | [0.685,1.116] | 0.280 | 0.774 | [0.506,1.183] | 0.236 | 0.885 | [0.559,1.401] | 0.602 | 0.323 |
| rs2020924  | PLAT     | C | 0.109 | 0.735 | [0.492,1.096] | 0.131 | 0.900 | [0.446,1.818] | 0.769 | 1.225 | [0.571,2.632] | 0.602 | 0.318 |
| rs1799999  | PPP1R3A  | T | 0.146 | 1.006 | [0.734,1.379] | 0.970 | 1.176 | [0.685,2.019] | 0.557 | 1.169 | [0.65,2.104]  | 0.603 | 0.841 |
| rs16900023 | C6orf26  | T | 0.032 | 0.722 | [0.341,1.531] | 0.396 | 1.009 | [0.334,3.047] | 0.987 | 1.397 | [0.396,4.926] | 0.603 | 0.693 |
| rs3731258  | CDK6     | T | 0.031 | 1.639 | [0.811,3.312] | 0.168 | 2.180 | [0.816,5.821] | 0.120 | 1.330 | [0.455,3.888] | 0.603 | 0.171 |
| rs875740   | ABCC1    | G | 0.373 | 1.142 | [0.898,1.452] | 0.279 | 1.009 | [0.651,1.562] | 0.969 | 0.883 | [0.553,1.41]  | 0.603 | 0.553 |
| rs11818239 | BMPR1A   | A | 0.021 | 1.789 | [0.691,4.629] | 0.231 | 2.663 | [0.695,10.2]  | 0.153 | 1.489 | [0.33,6.711]  | 0.604 | 0.226 |
| rs3770596  | ABCB11   | A | 0.445 | 0.875 | [0.688,1.112] | 0.274 | 0.989 | [0.642,1.525] | 0.960 | 1.131 | [0.71,1.8]    | 0.605 | 0.547 |
| rs1133818  | MYCBPAP  | C | 0.260 | 0.832 | [0.634,1.09]  | 0.181 | 0.952 | [0.592,1.53]  | 0.839 | 1.145 | [0.685,1.914] | 0.606 | 0.409 |

|            |          |   |       |       |               |       |       |               |       |       |               |       |       |
|------------|----------|---|-------|-------|---------------|-------|-------|---------------|-------|-------|---------------|-------|-------|
| rs1319869  | IGF1R    | C | 0.197 | 1.205 | [0.879,1.653] | 0.247 | 1.028 | [0.585,1.807] | 0.924 | 0.853 | [0.466,1.562] | 0.606 | 0.510 |
| rs3177980  | SELL     | C | 0.227 | 0.906 | [0.69,1.19]   | 0.477 | 1.038 | [0.643,1.676] | 0.878 | 1.146 | [0.682,1.925] | 0.607 | 0.753 |
| rs216902   | VWF      | A | 0.389 | 1.063 | [0.843,1.341] | 0.606 | 1.196 | [0.786,1.82]  | 0.403 | 1.125 | [0.718,1.765] | 0.607 | 0.650 |
| rs12221497 | NR1H3    | A | 0.114 | 1.092 | [0.767,1.554] | 0.625 | 0.895 | [0.436,1.838] | 0.762 | 0.819 | [0.384,1.749] | 0.607 | 0.828 |
| rs1587241  | PPP3CA   | G | 0.322 | 0.855 | [0.659,1.109] | 0.237 | 0.747 | [0.462,1.206] | 0.233 | 0.874 | [0.522,1.462] | 0.608 | 0.287 |
| rs17110453 | CYP2C8   | C | 0.119 | 1.274 | [0.903,1.798] | 0.167 | 1.059 | [0.54,2.076]  | 0.868 | 0.831 | [0.409,1.689] | 0.608 | 0.385 |
| rs2017662  | TNFRSF17 | T | 0.087 | 1.093 | [0.704,1.695] | 0.692 | 0.877 | [0.4,1.925]   | 0.744 | 0.803 | [0.346,1.861] | 0.608 | 0.857 |
| rs3760413  | EME1     | T | 0.126 | 0.938 | [0.671,1.311] | 0.706 | 1.110 | [0.607,2.03]  | 0.735 | 1.184 | [0.62,2.261]  | 0.609 | 0.861 |
| rs1801274  | FCGR2A   | C | 0.491 | 1.009 | [0.801,1.271] | 0.941 | 1.131 | [0.752,1.701] | 0.554 | 1.121 | [0.722,1.741] | 0.610 | 0.839 |
| rs585800   | BHMT     | T | 0.234 | 1.040 | [0.782,1.382] | 0.790 | 1.198 | [0.719,1.998] | 0.488 | 1.153 | [0.667,1.994] | 0.611 | 0.775 |
| rs3743591  | TNFRSF17 | G | 0.088 | 1.074 | [0.693,1.665] | 0.748 | 0.865 | [0.394,1.896] | 0.717 | 0.805 | [0.347,1.864] | 0.612 | 0.871 |
| rs1634499  | CCL3     | G | 0.229 | 0.904 | [0.683,1.198] | 0.484 | 1.036 | [0.637,1.686] | 0.885 | 1.146 | [0.676,1.941] | 0.613 | 0.760 |
| rs10407115 | PPAP2C   | A | 0.434 | 0.980 | [0.773,1.241] | 0.864 | 1.103 | [0.718,1.696] | 0.654 | 1.126 | [0.71,1.786]  | 0.613 | 0.880 |
| rs1532268  | MTRR     | A | 0.343 | 1.108 | [0.869,1.414] | 0.409 | 0.980 | [0.627,1.531] | 0.929 | 0.884 | [0.549,1.425] | 0.614 | 0.696 |
| rs1063147  | BLM      | T | 0.175 | 0.824 | [0.598,1.135] | 0.235 | 0.961 | [0.554,1.665] | 0.886 | 1.166 | [0.642,2.119] | 0.614 | 0.494 |
| rs3732378  | CX3CR1   | A | 0.157 | 1.094 | [0.789,1.517] | 0.589 | 1.283 | [0.723,2.277] | 0.395 | 1.173 | [0.632,2.175] | 0.614 | 0.637 |
| rs20579    | LIG1     | T | 0.157 | 0.771 | [0.549,1.084] | 0.135 | 0.648 | [0.346,1.213] | 0.175 | 0.840 | [0.427,1.652] | 0.614 | 0.162 |
| rs4809957  | CYP24A1  | G | 0.265 | 0.942 | [0.713,1.244] | 0.674 | 1.077 | [0.665,1.745] | 0.762 | 1.144 | [0.678,1.929] | 0.614 | 0.856 |
| rs776740   | CYP3A7   | A | 0.021 | 1.010 | [0.426,2.397] | 0.982 | 0.663 | [0.148,2.97]  | 0.591 | 0.656 | [0.127,3.381] | 0.615 | 0.862 |
| rs2687080  | CYP3A7   | C | 0.021 | 1.010 | [0.426,2.396] | 0.982 | 0.663 | [0.148,2.97]  | 0.591 | 0.656 | [0.127,3.382] | 0.615 | 0.862 |
| rs5743557  | TLR1     | T | 0.168 | 0.907 | [0.657,1.253] | 0.554 | 1.063 | [0.6,1.885]   | 0.834 | 1.172 | [0.632,2.174] | 0.615 | 0.804 |
| rs907806   | IGF1R    | G | 0.149 | 1.123 | [0.803,1.57]  | 0.500 | 1.314 | [0.743,2.327] | 0.348 | 1.171 | [0.633,2.167] | 0.615 | 0.558 |
| rs9403723  | SIM1     | G | 0.338 | 0.868 | [0.68,1.108]  | 0.256 | 0.766 | [0.486,1.208] | 0.252 | 0.883 | [0.542,1.437] | 0.616 | 0.318 |
| rs6508     | WIT1     | A | 0.122 | 0.861 | [0.578,1.282] | 0.461 | 0.705 | [0.343,1.45]  | 0.342 | 0.819 | [0.375,1.787] | 0.616 | 0.524 |
| rs2062541  | ABCC1    | C | 0.424 | 1.097 | [0.857,1.404] | 0.460 | 1.241 | [0.792,1.945] | 0.346 | 1.131 | [0.698,1.832] | 0.617 | 0.531 |
| rs11574138 | VDR      | G | 0.017 | 0.852 | [0.277,2.619] | 0.779 | 0.478 | [0.059,3.86]  | 0.488 | 0.561 | [0.058,5.408] | 0.617 | 0.769 |
| rs8034835  | CYP19A1  | G | 0.473 | 0.944 | [0.743,1.199] | 0.635 | 1.062 | [0.691,1.631] | 0.785 | 1.125 | [0.709,1.785] | 0.617 | 0.843 |
| rs1134921  | GAK      | A | 0.120 | 1.067 | [0.752,1.513] | 0.717 | 0.892 | [0.458,1.736] | 0.736 | 0.836 | [0.414,1.689] | 0.617 | 0.865 |
| rs2238335  | BLM      | C | 0.051 | 1.600 | [0.935,2.738] | 0.086 | 2.006 | [0.88,4.575]  | 0.098 | 1.254 | [0.516,3.044] | 0.618 | 0.094 |
| rs3743527  | ABCC1    | T | 0.199 | 0.935 | [0.691,1.265] | 0.662 | 1.086 | [0.629,1.873] | 0.767 | 1.162 | [0.645,2.091] | 0.618 | 0.853 |
| rs268687   | SERTAD1  | A | 0.408 | 1.261 | [0.977,1.627] | 0.075 | 1.430 | [0.9,2.272]   | 0.130 | 1.134 | [0.692,1.86]  | 0.618 | 0.091 |
| rs2069832  | IL6      | A | 0.324 | 1.189 | [0.937,1.51]  | 0.155 | 1.052 | [0.67,1.653]  | 0.824 | 0.885 | [0.547,1.431] | 0.618 | 0.363 |
| rs6019     | F5       | C | 0.096 | 1.248 | [0.811,1.919] | 0.314 | 1.519 | [0.743,3.104] | 0.252 | 1.217 | [0.561,2.642] | 0.619 | 0.365 |
| rs1419745  | CYP3A5   | G | 0.101 | 1.037 | [0.665,1.619] | 0.871 | 1.260 | [0.625,2.541] | 0.518 | 1.215 | [0.565,2.613] | 0.619 | 0.810 |
| rs1709082  | CYP2A13  | G | 0.146 | 1.180 | [0.823,1.692] | 0.369 | 0.991 | [0.523,1.877] | 0.977 | 0.840 | [0.422,1.671] | 0.619 | 0.659 |
| rs246      | OPCML    | A | 0.221 | 0.951 | [0.718,1.259] | 0.724 | 1.085 | [0.67,1.758]  | 0.740 | 1.141 | [0.677,1.923] | 0.620 | 0.872 |
| rs3097     | CYP11B2  | A | 0.226 | 0.869 | [0.653,1.155] | 0.333 | 1.001 | [0.594,1.687] | 0.997 | 1.153 | [0.658,2.021] | 0.620 | 0.620 |
| rs11188254 | PDLIM1   | A | 0.345 | 1.031 | [0.799,1.331] | 0.814 | 0.912 | [0.58,1.433]  | 0.689 | 0.884 | [0.544,1.438] | 0.620 | 0.883 |
| rs6330     | NGF      | T | 0.392 | 0.983 | [0.771,1.254] | 0.892 | 1.110 | [0.709,1.739] | 0.647 | 1.129 | [0.698,1.826] | 0.620 | 0.883 |
| rs1063857  | VWF      | C | 0.384 | 1.077 | [0.848,1.368] | 0.543 | 1.209 | [0.79,1.852]  | 0.382 | 1.123 | [0.71,1.775]  | 0.621 | 0.606 |
| rs10836230 | CAT      | T | 0.317 | 0.810 | [0.621,1.057] | 0.121 | 0.708 | [0.429,1.168] | 0.176 | 0.874 | [0.511,1.493] | 0.621 | 0.152 |

|            |              |   |       |       |               |       |       |               |       |       |               |       |       |
|------------|--------------|---|-------|-------|---------------|-------|-------|---------------|-------|-------|---------------|-------|-------|
| rs13706    | CDC6         | A | 0.174 | 1.052 | [0.762,1.453] | 0.757 | 1.222 | [0.704,2.12]  | 0.475 | 1.161 | [0.641,2.103] | 0.621 | 0.760 |
| rs2296869  | SETX         | G | 0.263 | 1.170 | [0.888,1.541] | 0.264 | 1.024 | [0.624,1.682] | 0.924 | 0.875 | [0.515,1.488] | 0.623 | 0.534 |
| rs1514346  | IRF4         | A | 0.185 | 1.154 | [0.847,1.572] | 0.363 | 0.992 | [0.565,1.741] | 0.977 | 0.859 | [0.47,1.572]  | 0.623 | 0.654 |
| rs12680    | LOC100129773 | C | 0.117 | 1.438 | [0.95,2.177]  | 0.086 | 1.179 | [0.561,2.477] | 0.663 | 0.820 | [0.372,1.809] | 0.623 | 0.225 |
| rs9282616  | BLM          | G | 0.063 | 1.031 | [0.625,1.7]   | 0.906 | 1.278 | [0.589,2.772] | 0.535 | 1.240 | [0.526,2.92]  | 0.623 | 0.825 |
| rs16945474 | PHKB         | G | 0.054 | 1.087 | [0.64,1.845]  | 0.757 | 0.836 | [0.314,2.228] | 0.720 | 0.769 | [0.269,2.195] | 0.624 | 0.879 |
| rs2282079  | LOC100130458 | A | 0.059 | 0.855 | [0.5,1.463]   | 0.568 | 0.644 | [0.224,1.855] | 0.415 | 0.753 | [0.242,2.341] | 0.624 | 0.637 |
| rs8305     | POLI         | G | 0.251 | 0.956 | [0.727,1.257] | 0.748 | 0.834 | [0.5,1.392]   | 0.488 | 0.873 | [0.506,1.506] | 0.624 | 0.767 |
| rs35596    | ABCC1        | C | 0.299 | 0.881 | [0.671,1.158] | 0.365 | 1.001 | [0.625,1.603] | 0.996 | 1.136 | [0.682,1.892] | 0.625 | 0.658 |
| rs7871785  | PSMB7        | G | 0.444 | 0.988 | [0.779,1.253] | 0.920 | 1.107 | [0.723,1.695] | 0.640 | 1.121 | [0.709,1.771] | 0.626 | 0.884 |
| rs17683288 | ARHGEF10     | G | 0.057 | 0.682 | [0.397,1.172] | 0.166 | 0.880 | [0.345,2.247] | 0.789 | 1.291 | [0.462,3.603] | 0.626 | 0.380 |
| rs215048   | ABCC1        | A | 0.130 | 1.249 | [0.888,1.757] | 0.201 | 1.052 | [0.546,2.025] | 0.880 | 0.842 | [0.421,1.684] | 0.626 | 0.442 |
| rs17037390 | MTHFR        | A | 0.171 | 0.855 | [0.621,1.176] | 0.335 | 0.726 | [0.394,1.338] | 0.305 | 0.850 | [0.441,1.637] | 0.627 | 0.412 |
| rs230547   | NFKB1        | T | 0.102 | 0.949 | [0.649,1.389] | 0.788 | 1.125 | [0.599,2.114] | 0.714 | 1.185 | [0.598,2.351] | 0.627 | 0.886 |
| rs1805075  | IGF2R        | G | 0.058 | 0.773 | [0.459,1.302] | 0.333 | 0.996 | [0.387,2.564] | 0.993 | 1.288 | [0.464,3.572] | 0.627 | 0.622 |
| rs2228529  | ERCC6        | G | 0.196 | 0.965 | [0.718,1.297] | 0.813 | 1.109 | [0.658,1.87]  | 0.699 | 1.149 | [0.656,2.013] | 0.627 | 0.887 |
| rs1126670  | ADH4         | G | 0.270 | 0.908 | [0.702,1.175] | 0.463 | 1.029 | [0.641,1.652] | 0.905 | 1.134 | [0.682,1.883] | 0.628 | 0.746 |
| rs163078   | FAM82A       | T | 0.369 | 1.072 | [0.844,1.361] | 0.569 | 0.953 | [0.611,1.487] | 0.833 | 0.889 | [0.552,1.432] | 0.629 | 0.815 |
| rs2137975  | DPYD         | C | 0.320 | 1.009 | [0.787,1.295] | 0.943 | 0.892 | [0.557,1.427] | 0.633 | 0.884 | [0.534,1.461] | 0.630 | 0.884 |
| rs504348   | ABCC1        | G | 0.239 | 1.057 | [0.784,1.425] | 0.716 | 1.209 | [0.73,2.001]  | 0.461 | 1.144 | [0.662,1.975] | 0.630 | 0.737 |
| rs954923   | DPYD         | T | 0.019 | 2.522 | [1.144,5.558] | 0.022 | 1.792 | [0.479,6.704] | 0.387 | 0.710 | [0.176,2.86]  | 0.630 | 0.066 |
| rs2292334  | SLC22A3      | T | 0.358 | 0.853 | [0.667,1.091] | 0.205 | 0.757 | [0.478,1.197] | 0.234 | 0.887 | [0.544,1.447] | 0.631 | 0.265 |
| rs28365094 | CYP3A5       | G | 0.087 | 1.087 | [0.728,1.625] | 0.683 | 0.879 | [0.386,2.002] | 0.759 | 0.808 | [0.339,1.926] | 0.631 | 0.861 |
| rs1061646  | FANCA        | T | 0.366 | 1.317 | [1.039,1.669] | 0.023 | 1.471 | [0.966,2.239] | 0.072 | 1.117 | [0.712,1.751] | 0.631 | 0.025 |
| rs1456432  | CYP1A1       | G | 0.233 | 1.195 | [0.906,1.575] | 0.207 | 1.049 | [0.64,1.722]  | 0.849 | 0.878 | [0.517,1.493] | 0.631 | 0.451 |
| rs1801282  | PPARG        | G | 0.105 | 1.012 | [0.694,1.477] | 0.949 | 1.208 | [0.619,2.358] | 0.580 | 1.193 | [0.58,2.456]  | 0.632 | 0.858 |
| rs2266780  | FMO3         | G | 0.157 | 1.060 | [0.78,1.439]  | 0.712 | 1.220 | [0.71,2.099]  | 0.472 | 1.152 | [0.644,2.059] | 0.633 | 0.745 |
| rs2020860  | FMO2         | C | 0.080 | 1.053 | [0.663,1.673] | 0.826 | 1.278 | [0.623,2.619] | 0.504 | 1.213 | [0.549,2.681] | 0.634 | 0.794 |
| rs2070904  | CYP2D6       | G | 0.446 | 1.142 | [0.908,1.438] | 0.256 | 1.028 | [0.688,1.538] | 0.892 | 0.900 | [0.584,1.388] | 0.634 | 0.524 |
| rs828052   | DPYD         | T | 0.401 | 0.887 | [0.703,1.121] | 0.315 | 0.993 | [0.644,1.533] | 0.975 | 1.119 | [0.704,1.781] | 0.634 | 0.601 |
| rs9997     | KLHL22       | C | 0.347 | 1.048 | [0.815,1.347] | 0.714 | 1.178 | [0.754,1.839] | 0.472 | 1.124 | [0.695,1.818] | 0.634 | 0.744 |
| rs9862     | SYN3         | T | 0.434 | 0.818 | [0.641,1.044] | 0.107 | 0.728 | [0.464,1.141] | 0.166 | 0.889 | [0.549,1.442] | 0.634 | 0.136 |
| rs4443426  | MGC42105     | C | 0.471 | 0.859 | [0.684,1.079] | 0.191 | 0.770 | [0.506,1.173] | 0.223 | 0.897 | [0.572,1.406] | 0.635 | 0.245 |
| rs2235074  | ABCB1        | T | 0.048 | 0.539 | [0.273,1.062] | 0.074 | 0.724 | [0.245,2.143] | 0.560 | 1.343 | [0.398,4.534] | 0.635 | 0.188 |
| rs1805016  | IL4R         | G | 0.087 | 0.638 | [0.379,1.077] | 0.092 | 0.788 | [0.37,1.677]  | 0.536 | 1.234 | [0.518,2.935] | 0.635 | 0.222 |
| rs1464645  | BCL6         | T | 0.186 | 1.125 | [0.827,1.53]  | 0.452 | 1.286 | [0.771,2.143] | 0.335 | 1.143 | [0.658,1.986] | 0.636 | 0.523 |
| rs2229032  | ATR          | A | 0.148 | 0.856 | [0.616,1.191] | 0.356 | 0.724 | [0.377,1.39]  | 0.332 | 0.846 | [0.423,1.693] | 0.636 | 0.449 |
| rs854555   | PON1         | A | 0.431 | 0.788 | [0.621,0.999] | 0.049 | 0.880 | [0.575,1.345] | 0.554 | 1.116 | [0.707,1.764] | 0.637 | 0.137 |
| rs3088142  | DUSP13       | T | 0.491 | 1.079 | [0.854,1.363] | 0.524 | 0.967 | [0.633,1.478] | 0.878 | 0.897 | [0.569,1.412] | 0.638 | 0.792 |
| rs1329568  | LOC100130458 | A | 0.034 | 1.040 | [0.51,2.119]  | 0.914 | 0.747 | [0.212,2.635] | 0.651 | 0.719 | [0.182,2.842] | 0.638 | 0.891 |
| rs1395119  | SIM1         | T | 0.338 | 0.862 | [0.675,1.1]   | 0.233 | 0.767 | [0.486,1.209] | 0.253 | 0.890 | [0.547,1.448] | 0.638 | 0.301 |

|            |            |   |       |       |               |       |       |               |       |       |                |       |       |
|------------|------------|---|-------|-------|---------------|-------|-------|---------------|-------|-------|----------------|-------|-------|
| rs679620   | MMP3       | A | 0.487 | 0.972 | [0.767,1.233] | 0.816 | 1.083 | [0.715,1.64]  | 0.708 | 1.114 | [0.711,1.744]  | 0.638 | 0.894 |
| rs2074570  | IL4R       | G | 0.063 | 0.929 | [0.571,1.512] | 0.767 | 0.735 | [0.298,1.815] | 0.504 | 0.791 | [0.298,2.103]  | 0.639 | 0.781 |
| rs25680    | CD27       | A | 0.204 | 0.981 | [0.73,1.319]  | 0.901 | 1.122 | [0.668,1.884] | 0.663 | 1.143 | [0.654,2]      | 0.639 | 0.893 |
| rs978458   | IGF1       | A | 0.281 | 0.801 | [0.61,1.051]  | 0.109 | 0.907 | [0.56,1.468]  | 0.690 | 1.133 | [0.673,1.907]  | 0.640 | 0.273 |
| rs4987131  | CYBA       | C | 0.020 | 0.602 | [0.198,1.829] | 0.371 | 0.350 | [0.044,2.799] | 0.322 | 0.581 | [0.06,5.655]   | 0.640 | 0.439 |
| rs2305706  | CYP19A1    | G | 0.251 | 1.437 | [1.062,1.945] | 0.019 | 1.252 | [0.729,2.15]  | 0.415 | 0.871 | [0.489,1.553]  | 0.640 | 0.057 |
| rs2069443  | CDK5       | C | 0.318 | 0.720 | [0.552,0.938] | 0.015 | 0.813 | [0.507,1.303] | 0.390 | 1.129 | [0.678,1.88]   | 0.640 | 0.045 |
| rs2011404  | UGT1A10    | T | 0.127 | 1.066 | [0.749,1.516] | 0.723 | 1.248 | [0.673,2.313] | 0.482 | 1.171 | [0.604,2.27]   | 0.640 | 0.757 |
| rs1064796  | CYP4F11    | C | 0.256 | 1.040 | [0.808,1.339] | 0.762 | 0.920 | [0.568,1.491] | 0.735 | 0.885 | [0.528,1.481]  | 0.641 | 0.888 |
| rs11569046 | EGF        | C | 0.019 | 0.600 | [0.201,1.787] | 0.359 | 0.354 | [0.047,2.663] | 0.313 | 0.590 | [0.064,5.417]  | 0.641 | 0.422 |
| rs887241   | ALDH3A1    | T | 0.331 | 0.964 | [0.746,1.246] | 0.782 | 0.854 | [0.529,1.379] | 0.518 | 0.885 | [0.53,1.478]   | 0.642 | 0.797 |
| rs2303425  | MSH2       | C | 0.108 | 0.935 | [0.639,1.367] | 0.727 | 1.107 | [0.575,2.13]  | 0.761 | 1.184 | [0.581,2.416]  | 0.642 | 0.884 |
| rs3218273  | IL2RB      | T | 0.012 | 0.930 | [0.241,3.58]  | 0.915 | 1.488 | [0.277,7.984] | 0.643 | 1.601 | [0.221,11.609] | 0.642 | 0.883 |
| rs1380657  | MYCBPAP    | G | 0.263 | 0.826 | [0.63,1.083]  | 0.166 | 0.933 | [0.579,1.503] | 0.777 | 1.130 | [0.675,1.893]  | 0.642 | 0.381 |
| rs2069807  | IL5        | T | 0.033 | 1.744 | [0.833,3.648] | 0.140 | 1.286 | [0.396,4.174] | 0.676 | 0.737 | [0.204,2.664]  | 0.642 | 0.331 |
| rs2193587  | DGKG       | G | 0.202 | 1.086 | [0.813,1.449] | 0.578 | 0.943 | [0.54,1.647]  | 0.837 | 0.869 | [0.481,1.571]  | 0.642 | 0.823 |
| rs6717546  | UGT1A1     | A | 0.379 | 1.193 | [0.917,1.55]  | 0.188 | 1.062 | [0.677,1.666] | 0.792 | 0.891 | [0.547,1.451]  | 0.642 | 0.419 |
| rs207908   | XRCC5      | T | 0.485 | 1.128 | [0.892,1.427] | 0.313 | 1.016 | [0.671,1.538] | 0.941 | 0.900 | [0.576,1.407]  | 0.644 | 0.600 |
| rs9482     | ATF6       | A | 0.322 | 1.049 | [0.813,1.354] | 0.712 | 1.175 | [0.752,1.835] | 0.479 | 1.120 | [0.693,1.809]  | 0.645 | 0.751 |
| rs1138294  | MAP3K6     | T | 0.325 | 0.926 | [0.72,1.191]  | 0.549 | 0.823 | [0.516,1.313] | 0.414 | 0.889 | [0.54,1.465]   | 0.645 | 0.635 |
| rs1144945  | MDM2       | T | 0.020 | 0.891 | [0.353,2.247] | 0.807 | 0.539 | [0.073,4.005] | 0.546 | 0.606 | [0.072,5.107]  | 0.645 | 0.818 |
| rs207906   | XRCC5      | A | 0.124 | 0.867 | [0.603,1.247] | 0.441 | 1.016 | [0.543,1.9]   | 0.961 | 1.172 | [0.595,2.308]  | 0.647 | 0.734 |
| rs275652   | AGTR1      | C | 0.186 | 0.801 | [0.584,1.1]   | 0.170 | 0.919 | [0.536,1.577] | 0.760 | 1.147 | [0.637,2.068]  | 0.647 | 0.387 |
| rs4072037  | MUC1       | G | 0.419 | 0.794 | [0.631,1]     | 0.050 | 0.881 | [0.583,1.332] | 0.548 | 1.109 | [0.711,1.73]   | 0.648 | 0.140 |
| rs448012   | FLT4       | G | 0.389 | 0.842 | [0.653,1.087] | 0.187 | 0.941 | [0.607,1.458] | 0.785 | 1.117 | [0.694,1.797]  | 0.649 | 0.417 |
| rs20541    | IL13       | T | 0.204 | 1.053 | [0.801,1.386] | 0.710 | 0.925 | [0.546,1.567] | 0.771 | 0.878 | [0.501,1.538]  | 0.649 | 0.880 |
| rs6761641  | PASK       | C | 0.194 | 0.967 | [0.712,1.312] | 0.828 | 1.098 | [0.662,1.822] | 0.718 | 1.136 | [0.656,1.967]  | 0.650 | 0.901 |
| rs4757707  | PTPN5      | C | 0.338 | 1.078 | [0.822,1.414] | 0.589 | 1.213 | [0.753,1.955] | 0.427 | 1.126 | [0.674,1.879]  | 0.651 | 0.666 |
| rs848291   | FANCL      | T | 0.334 | 1.014 | [0.789,1.303] | 0.916 | 0.903 | [0.566,1.441] | 0.669 | 0.891 | [0.54,1.469]   | 0.651 | 0.900 |
| rs963981   | KIAA1804   | C | 0.200 | 1.067 | [0.802,1.421] | 0.657 | 0.935 | [0.548,1.596] | 0.805 | 0.876 | [0.495,1.552]  | 0.651 | 0.864 |
| rs7909236  | CYP2C8     | T | 0.212 | 1.020 | [0.761,1.366] | 0.895 | 1.161 | [0.687,1.964] | 0.577 | 1.139 | [0.649,1.999]  | 0.651 | 0.855 |
| rs1801702  | APOB       | C | 0.043 | 1.067 | [0.605,1.882] | 0.823 | 0.796 | [0.239,2.652] | 0.710 | 0.746 | [0.209,2.659]  | 0.651 | 0.900 |
| rs10018297 | Intergenic | G | 0.015 | 1.398 | [0.506,3.858] | 0.518 | 1.986 | [0.509,7.747] | 0.323 | 1.421 | [0.309,6.541]  | 0.652 | 0.552 |
| rs1017186  | GSTZ1      | G | 0.180 | 1.026 | [0.756,1.392] | 0.870 | 0.888 | [0.491,1.604] | 0.693 | 0.865 | [0.461,1.623]  | 0.652 | 0.903 |
| rs1760217  | DPYD       | C | 0.218 | 0.920 | [0.692,1.222] | 0.565 | 0.806 | [0.472,1.377] | 0.431 | 0.876 | [0.494,1.554]  | 0.652 | 0.654 |
| rs5297     | CYP11B1    | C | 0.112 | 1.088 | [0.735,1.609] | 0.674 | 0.913 | [0.45,1.854]  | 0.801 | 0.839 | [0.392,1.796]  | 0.652 | 0.871 |
| rs529126   | MRE11A     | A | 0.279 | 1.172 | [0.905,1.518] | 0.228 | 1.046 | [0.659,1.661] | 0.847 | 0.893 | [0.545,1.463]  | 0.653 | 0.483 |
| rs4148951  | CHST3      | A | 0.033 | 1.950 | [0.949,4.005] | 0.069 | 1.461 | [0.456,4.676] | 0.523 | 0.749 | [0.213,2.637]  | 0.653 | 0.181 |
| rs12022378 | AP4B1      | T | 0.187 | 1.357 | [1.013,1.819] | 0.041 | 1.184 | [0.674,2.08]  | 0.557 | 0.872 | [0.48,1.584]   | 0.653 | 0.118 |
| rs2230517  | MERTK      | A | 0.061 | 1.176 | [0.682,2.028] | 0.560 | 1.468 | [0.608,3.546] | 0.394 | 1.248 | [0.474,3.285]  | 0.653 | 0.624 |
| rs1130371  | CCL3       | T | 0.221 | 0.906 | [0.677,1.211] | 0.504 | 1.028 | [0.615,1.719] | 0.915 | 1.136 | [0.652,1.979]  | 0.654 | 0.784 |

|            |         |   |       |       |               |       |       |                |       |       |                |       |       |
|------------|---------|---|-------|-------|---------------|-------|-------|----------------|-------|-------|----------------|-------|-------|
| rs1544410  | VDR     | A | 0.366 | 0.851 | [0.667,1.086] | 0.196 | 0.948 | [0.612,1.469]  | 0.811 | 1.114 | [0.695,1.784]  | 0.654 | 0.432 |
| rs1057056  | CHST10  | A | 0.078 | 1.413 | [0.86,2.32]   | 0.172 | 1.148 | [0.495,2.659]  | 0.748 | 0.812 | [0.327,2.017]  | 0.654 | 0.391 |
| rs2072352  | BLM     | T | 0.341 | 0.873 | [0.677,1.127] | 0.297 | 0.782 | [0.5,1.224]    | 0.282 | 0.896 | [0.552,1.452]  | 0.654 | 0.375 |
| rs1990277  | ARVCF   | A | 0.371 | 0.990 | [0.773,1.269] | 0.938 | 0.886 | [0.561,1.399]  | 0.603 | 0.895 | [0.549,1.458]  | 0.655 | 0.874 |
| rs3740526  | MMS19   | A | 0.368 | 1.235 | [0.965,1.579] | 0.094 | 1.376 | [0.881,2.149]  | 0.160 | 1.115 | [0.691,1.798]  | 0.655 | 0.122 |
| rs2241529  | DKK1    | A | 0.435 | 1.131 | [0.89,1.436]  | 0.314 | 1.018 | [0.66,1.569]   | 0.936 | 0.900 | [0.567,1.429]  | 0.656 | 0.601 |
| rs3747806  | ABCB4   | C | 0.071 | 1.085 | [0.672,1.751] | 0.738 | 0.880 | [0.375,2.066]  | 0.769 | 0.811 | [0.322,2.039]  | 0.656 | 0.892 |
| rs7746988  | PPARD   | C | 0.067 | 0.814 | [0.467,1.416] | 0.466 | 1.010 | [0.431,2.367]  | 0.982 | 1.241 | [0.48,3.21]    | 0.656 | 0.761 |
| rs13392272 | APOB    | T | 0.419 | 0.995 | [0.778,1.272] | 0.968 | 0.892 | [0.568,1.399]  | 0.618 | 0.896 | [0.554,1.451]  | 0.656 | 0.883 |
| rs3138047  | NFKBIA  | T | 0.218 | 0.803 | [0.6,1.075]   | 0.140 | 0.913 | [0.543,1.533]  | 0.730 | 1.136 | [0.648,1.992]  | 0.656 | 0.333 |
| rs4646316  | COMT    | T | 0.227 | 0.895 | [0.67,1.196]  | 0.454 | 0.785 | [0.458,1.347]  | 0.380 | 0.877 | [0.492,1.563]  | 0.657 | 0.555 |
| rs1788817  | C18orf8 | G | 0.488 | 1.107 | [0.873,1.402] | 0.401 | 0.999 | [0.656,1.52]   | 0.995 | 0.902 | [0.573,1.42]   | 0.657 | 0.698 |
| rs11030918 | RRM1    | C | 0.321 | 0.860 | [0.675,1.095] | 0.220 | 0.955 | [0.619,1.475]  | 0.837 | 1.111 | [0.696,1.774]  | 0.658 | 0.471 |
| rs16879427 | PSKH2   | C | 0.058 | 0.616 | [0.315,1.207] | 0.158 | 0.793 | [0.299,2.105]  | 0.642 | 1.287 | [0.422,3.928]  | 0.658 | 0.353 |
| rs496190   | MRE11A  | C | 0.496 | 1.083 | [0.861,1.364] | 0.495 | 0.980 | [0.646,1.487]  | 0.924 | 0.904 | [0.579,1.413]  | 0.659 | 0.777 |
| rs903880   | ABCC1   | A | 0.308 | 1.006 | [0.758,1.333] | 0.969 | 0.889 | [0.534,1.482]  | 0.652 | 0.884 | [0.511,1.529]  | 0.660 | 0.899 |
| rs10895068 | PGR     | A | 0.045 | 1.645 | [0.968,2.796] | 0.066 | 2.007 | [0.874,4.611]  | 0.101 | 1.220 | [0.503,2.957]  | 0.660 | 0.081 |
| rs17037102 | DKK2    | A | 0.094 | 1.120 | [0.769,1.632] | 0.554 | 0.938 | [0.444,1.981]  | 0.867 | 0.837 | [0.38,1.847]   | 0.660 | 0.814 |
| rs152029   | ABCC1   | G | 0.184 | 1.247 | [0.901,1.728] | 0.183 | 1.086 | [0.612,1.927]  | 0.777 | 0.871 | [0.469,1.615]  | 0.661 | 0.411 |
| rs700241   | DAB2    | A | 0.036 | 1.254 | [0.682,2.309] | 0.467 | 0.949 | [0.294,3.061]  | 0.931 | 0.757 | [0.218,2.626]  | 0.661 | 0.754 |
| rs939336   | ABCC5   | A | 0.394 | 1.001 | [0.79,1.269]  | 0.992 | 1.108 | [0.726,1.691]  | 0.633 | 1.107 | [0.703,1.743]  | 0.661 | 0.891 |
| rs1800802  | MGP     | C | 0.173 | 1.215 | [0.903,1.634] | 0.198 | 1.064 | [0.611,1.855]  | 0.826 | 0.876 | [0.485,1.582]  | 0.661 | 0.436 |
| rs3783615  | VCAM1   | T | 0.010 | 0.719 | [0.148,3.491] | 0.683 | 1.272 | [0.14,11.531]  | 0.831 | 1.768 | [0.138,22.605] | 0.661 | 0.888 |
| rs1181795  | PPARG   | T | 0.072 | 1.138 | [0.729,1.777] | 0.569 | 1.365 | [0.64,2.911]   | 0.420 | 1.200 | [0.53,2.714]   | 0.662 | 0.653 |
| rs11045819 | SLCO1B1 | A | 0.142 | 0.725 | [0.512,1.026] | 0.070 | 0.616 | [0.313,1.214]  | 0.162 | 0.851 | [0.412,1.757]  | 0.662 | 0.094 |
| rs13166360 | ADCY2   | T | 0.184 | 0.788 | [0.576,1.078] | 0.136 | 0.904 | [0.51,1.604]   | 0.731 | 1.147 | [0.618,2.129]  | 0.663 | 0.326 |
| rs7957203  | SLCO1A2 | T | 0.306 | 1.027 | [0.796,1.324] | 0.837 | 0.917 | [0.569,1.478]  | 0.722 | 0.893 | [0.537,1.486]  | 0.663 | 0.908 |
| rs2227306  | IL8     | T | 0.385 | 0.943 | [0.739,1.204] | 0.639 | 1.046 | [0.678,1.614]  | 0.837 | 1.109 | [0.696,1.769]  | 0.663 | 0.863 |
| rs3856748  | CTNNB1  | T | 0.016 | 2.266 | [0.805,6.374] | 0.121 | 3.211 | [0.756,13.631] | 0.114 | 1.417 | [0.295,6.807]  | 0.663 | 0.137 |
| rs16975748 | LIPE    | T | 0.018 | 0.965 | [0.343,2.709] | 0.945 | 1.379 | [0.342,5.557]  | 0.651 | 1.430 | [0.286,7.15]   | 0.663 | 0.895 |
| rs3217805  | CCND2   | G | 0.351 | 0.949 | [0.74,1.216]  | 0.680 | 1.056 | [0.674,1.656]  | 0.811 | 1.113 | [0.687,1.804]  | 0.664 | 0.878 |
| rs1669703  | ADRB3   | T | 0.484 | 0.850 | [0.672,1.075] | 0.175 | 0.769 | [0.506,1.171]  | 0.221 | 0.905 | [0.577,1.42]   | 0.665 | 0.233 |
| rs3217773  | CCNA2   | C | 0.288 | 0.997 | [0.77,1.291]  | 0.979 | 1.114 | [0.697,1.78]   | 0.653 | 1.117 | [0.676,1.847]  | 0.665 | 0.900 |
| rs6084     | LIPC    | G | 0.447 | 0.888 | [0.702,1.122] | 0.318 | 0.803 | [0.527,1.224]  | 0.308 | 0.905 | [0.576,1.422]  | 0.665 | 0.409 |
| rs3136748  | POLB    | T | 0.081 | 1.044 | [0.659,1.653] | 0.856 | 0.860 | [0.385,1.923]  | 0.714 | 0.825 | [0.344,1.975]  | 0.665 | 0.911 |
| rs1051266  | SLC19A1 | A | 0.462 | 0.975 | [0.76,1.25]   | 0.840 | 0.875 | [0.554,1.381]  | 0.566 | 0.898 | [0.55,1.465]   | 0.665 | 0.841 |
| rs2276078  | HSPA8   | G | 0.017 | 1.138 | [0.475,2.73]  | 0.772 | 1.569 | [0.419,5.872]  | 0.503 | 1.379 | [0.321,5.925]  | 0.666 | 0.786 |
| rs1138357  | BCL2A1  | A | 0.287 | 1.003 | [0.778,1.292] | 0.984 | 1.115 | [0.712,1.748]  | 0.634 | 1.112 | [0.685,1.806]  | 0.666 | 0.892 |
| rs4646453  | CYP3A5  | T | 0.039 | 0.829 | [0.428,1.604] | 0.577 | 1.068 | [0.37,3.084]   | 0.903 | 1.289 | [0.406,4.094]  | 0.666 | 0.836 |
| rs1334811  | TEK     | A | 0.055 | 0.826 | [0.476,1.433] | 0.496 | 1.028 | [0.417,2.532]  | 0.953 | 1.244 | [0.461,3.361]  | 0.667 | 0.785 |
| rs6874941  | CART    | C | 0.205 | 0.965 | [0.716,1.301] | 0.815 | 0.850 | [0.498,1.451]  | 0.552 | 0.881 | [0.495,1.568]  | 0.667 | 0.828 |

|            |          |   |       |       |               |       |       |               |       |       |               |       |       |
|------------|----------|---|-------|-------|---------------|-------|-------|---------------|-------|-------|---------------|-------|-------|
| rs2111699  | GSTZ1    | G | 0.308 | 1.031 | [0.804,1.321] | 0.811 | 0.926 | [0.587,1.461] | 0.741 | 0.898 | [0.551,1.464] | 0.667 | 0.908 |
| rs2069843  | IL6      | A | 0.039 | 1.106 | [0.581,2.104] | 0.760 | 1.403 | [0.526,3.738] | 0.498 | 1.269 | [0.429,3.752] | 0.667 | 0.779 |
| rs2162679  | IGF1     | G | 0.221 | 0.905 | [0.677,1.211] | 0.503 | 1.019 | [0.619,1.679] | 0.940 | 1.126 | [0.656,1.933] | 0.667 | 0.788 |
| rs598599   | MRE11A   | A | 0.269 | 1.163 | [0.894,1.512] | 0.261 | 1.037 | [0.636,1.691] | 0.883 | 0.892 | [0.53,1.501]  | 0.667 | 0.532 |
| rs2246176  | RAD50    | C | 0.286 | 1.080 | [0.822,1.42]  | 0.579 | 0.959 | [0.578,1.593] | 0.873 | 0.888 | [0.516,1.527] | 0.668 | 0.833 |
| rs7732671  | PPARGC1B | C | 0.106 | 1.171 | [0.81,1.694]  | 0.401 | 1.003 | [0.517,1.946] | 0.993 | 0.856 | [0.421,1.741] | 0.668 | 0.698 |
| rs9282718  | IGF1R    | G | 0.062 | 1.274 | [0.806,2.013] | 0.299 | 1.520 | [0.719,3.213] | 0.273 | 1.193 | [0.533,2.673] | 0.668 | 0.379 |
| rs6271     | DBH      | T | 0.053 | 1.255 | [0.775,2.034] | 0.356 | 1.013 | [0.4,2.566]   | 0.978 | 0.807 | [0.303,2.151] | 0.668 | 0.648 |
| rs2479383  | PSMB4    | C | 0.164 | 1.028 | [0.755,1.4]   | 0.859 | 1.170 | [0.673,2.036] | 0.577 | 1.138 | [0.63,2.057]  | 0.668 | 0.852 |
| rs1043424  | PINK1    | C | 0.280 | 0.789 | [0.6,1.036]   | 0.089 | 0.882 | [0.549,1.419] | 0.606 | 1.119 | [0.669,1.872] | 0.668 | 0.225 |
| rs1051061  | VRK2     | G | 0.314 | 1.040 | [0.811,1.333] | 0.758 | 0.935 | [0.593,1.474] | 0.772 | 0.899 | [0.552,1.464] | 0.669 | 0.901 |
| rs3258     | FDFT1    | C | 0.377 | 1.018 | [0.8,1.296]   | 0.884 | 1.129 | [0.726,1.754] | 0.591 | 1.108 | [0.691,1.778] | 0.670 | 0.863 |
| rs5960     | F10      | C | 0.218 | 1.032 | [0.76,1.4]    | 0.842 | 1.169 | [0.684,1.999] | 0.567 | 1.134 | [0.637,2.019] | 0.670 | 0.843 |
| rs4925     | GSTO1    | A | 0.261 | 0.802 | [0.608,1.059] | 0.119 | 0.710 | [0.421,1.199] | 0.200 | 0.885 | [0.506,1.55]  | 0.670 | 0.164 |
| rs2007231  | CSDE1    | C | 0.307 | 0.829 | [0.639,1.077] | 0.161 | 0.738 | [0.447,1.22]  | 0.236 | 0.890 | [0.521,1.52]  | 0.670 | 0.225 |
| rs2069783  | IL3      | C | 0.033 | 1.041 | [0.478,2.267] | 0.920 | 1.370 | [0.446,4.21]  | 0.582 | 1.317 | [0.369,4.697] | 0.671 | 0.859 |
| rs2008691  | CYP19A1  | G | 0.208 | 1.517 | [1.137,2.026] | 0.005 | 1.346 | [0.799,2.267] | 0.264 | 0.887 | [0.51,1.544]  | 0.672 | 0.015 |
| rs2072651  | TPP1     | T | 0.180 | 1.133 | [0.837,1.534] | 0.417 | 1.279 | [0.761,2.15]  | 0.353 | 1.129 | [0.645,1.976] | 0.672 | 0.516 |
| rs2277461  | PSMA6    | C | 0.103 | 1.114 | [0.721,1.722] | 0.626 | 0.928 | [0.425,2.029] | 0.852 | 0.833 | [0.358,1.938] | 0.672 | 0.861 |
| rs3213195  | BLM      | G | 0.183 | 0.873 | [0.641,1.19]  | 0.391 | 0.989 | [0.58,1.686]  | 0.968 | 1.133 | [0.636,2.018] | 0.672 | 0.690 |
| rs7801671  | CYP3A4   | A | 0.037 | 1.299 | [0.603,2.801] | 0.504 | 0.969 | [0.28,3.352]  | 0.961 | 0.746 | [0.191,2.91]  | 0.673 | 0.791 |
| rs1333728  | DPYD     | T | 0.077 | 1.119 | [0.73,1.713]  | 0.606 | 1.323 | [0.638,2.745] | 0.452 | 1.183 | [0.542,2.582] | 0.673 | 0.697 |
| rs664143   | ATM      | T | 0.411 | 0.937 | [0.739,1.187] | 0.588 | 0.849 | [0.553,1.302] | 0.453 | 0.906 | [0.572,1.435] | 0.674 | 0.684 |
| rs1183768  | SETX     | C | 0.270 | 1.135 | [0.859,1.498] | 0.372 | 1.012 | [0.616,1.663] | 0.961 | 0.892 | [0.524,1.518] | 0.674 | 0.669 |
| rs541731   | SPRY2    | A | 0.407 | 1.066 | [0.843,1.348] | 0.594 | 0.967 | [0.634,1.476] | 0.877 | 0.908 | [0.577,1.428] | 0.675 | 0.845 |
| rs10846748 | SCARB1   | T | 0.369 | 0.880 | [0.688,1.126] | 0.309 | 0.973 | [0.629,1.504] | 0.902 | 1.106 | [0.691,1.77]  | 0.675 | 0.597 |
| rs329003   | PPP4R1   | G | 0.088 | 0.712 | [0.459,1.104] | 0.129 | 0.579 | [0.233,1.436] | 0.238 | 0.813 | [0.309,2.143] | 0.676 | 0.185 |
| rs2228570  | VDR      | T | 0.393 | 1.017 | [0.8,1.292]   | 0.891 | 0.920 | [0.594,1.426] | 0.710 | 0.905 | [0.566,1.446] | 0.676 | 0.916 |
| rs3802265  | ZHX2     | C | 0.387 | 0.969 | [0.761,1.233] | 0.797 | 0.876 | [0.564,1.361] | 0.557 | 0.905 | [0.564,1.451] | 0.678 | 0.828 |
| rs9332     | MTRR     | T | 0.143 | 0.941 | [0.656,1.349] | 0.741 | 1.082 | [0.591,1.981] | 0.799 | 1.150 | [0.595,2.221] | 0.678 | 0.904 |
| rs1413227  | DPYD     | A | 0.285 | 0.982 | [0.763,1.263] | 0.887 | 1.090 | [0.688,1.725] | 0.714 | 1.110 | [0.678,1.815] | 0.679 | 0.918 |
| rs3181366  | TNFSF8   | T | 0.397 | 0.876 | [0.689,1.115] | 0.283 | 0.793 | [0.51,1.233]  | 0.303 | 0.905 | [0.565,1.451] | 0.679 | 0.378 |
| rs693      | APOB     | T | 0.435 | 1.011 | [0.793,1.289] | 0.929 | 0.915 | [0.588,1.423] | 0.693 | 0.905 | [0.564,1.452] | 0.679 | 0.915 |
| rs1530259  | PPP3CA   | G | 0.410 | 1.108 | [0.861,1.425] | 0.428 | 1.230 | [0.773,1.956] | 0.383 | 1.110 | [0.677,1.821] | 0.679 | 0.545 |
| rs17685    | POR      | T | 0.255 | 0.801 | [0.608,1.056] | 0.115 | 0.714 | [0.428,1.191] | 0.197 | 0.891 | [0.514,1.542] | 0.679 | 0.159 |
| rs3803390  | SLC28A1  | A | 0.049 | 1.122 | [0.689,1.829] | 0.643 | 0.906 | [0.339,2.42]  | 0.844 | 0.807 | [0.291,2.237] | 0.680 | 0.863 |
| rs1152888  | IRAK3    | A | 0.147 | 0.885 | [0.614,1.276] | 0.513 | 0.762 | [0.391,1.482] | 0.422 | 0.860 | [0.421,1.76]  | 0.680 | 0.622 |
| rs162036   | MTRR     | G | 0.143 | 0.941 | [0.656,1.349] | 0.741 | 1.081 | [0.59,1.979]  | 0.802 | 1.148 | [0.594,2.218] | 0.681 | 0.905 |
| rs2844482  | LTA      | A | 0.121 | 0.855 | [0.594,1.229] | 0.397 | 0.999 | [0.501,1.993] | 0.997 | 1.169 | [0.556,2.456] | 0.681 | 0.696 |
| rs11574528 | MCAT     | T | 0.223 | 0.754 | [0.556,1.023] | 0.069 | 0.848 | [0.509,1.413] | 0.527 | 1.125 | [0.642,1.971] | 0.681 | 0.177 |
| rs351855   | FGFR4    | T | 0.301 | 0.947 | [0.72,1.247]  | 0.699 | 0.848 | [0.518,1.388] | 0.512 | 0.895 | [0.527,1.521] | 0.682 | 0.772 |

|            |              |   |       |       |               |       |       |               |       |       |               |       |       |
|------------|--------------|---|-------|-------|---------------|-------|-------|---------------|-------|-------|---------------|-------|-------|
| rs8190315  | BID          | G | 0.026 | 1.264 | [0.635,2.519] | 0.505 | 0.923 | [0.22,3.875]  | 0.913 | 0.730 | [0.161,3.299] | 0.682 | 0.785 |
| rs12470143 | SRD5A2       | T | 0.441 | 0.908 | [0.713,1.157] | 0.437 | 0.822 | [0.525,1.286] | 0.391 | 0.905 | [0.56,1.461]  | 0.683 | 0.554 |
| rs735943   | EXO1         | T | 0.416 | 1.264 | [1.003,1.592] | 0.047 | 1.151 | [0.757,1.749] | 0.511 | 0.911 | [0.581,1.426] | 0.683 | 0.129 |
| rs2857605  | NFKBIL1      | G | 0.168 | 0.778 | [0.561,1.081] | 0.135 | 0.889 | [0.492,1.607] | 0.698 | 1.143 | [0.603,2.165] | 0.683 | 0.321 |
| rs4725387  | FASTK        | G | 0.084 | 1.128 | [0.723,1.76]  | 0.596 | 1.343 | [0.619,2.91]  | 0.455 | 1.190 | [0.516,2.747] | 0.683 | 0.691 |
| rs886205   | ALDH2        | C | 0.282 | 0.968 | [0.718,1.304] | 0.830 | 1.085 | [0.656,1.795] | 0.752 | 1.121 | [0.649,1.936] | 0.683 | 0.919 |
| rs6028     | F5           | C | 0.253 | 1.083 | [0.828,1.418] | 0.559 | 0.967 | [0.58,1.613]  | 0.899 | 0.893 | [0.518,1.539] | 0.683 | 0.825 |
| rs1296028  | FDFT1        | G | 0.234 | 0.933 | [0.701,1.242] | 0.634 | 0.828 | [0.484,1.415] | 0.490 | 0.887 | [0.5,1.575]   | 0.683 | 0.730 |
| rs1805097  | IRS2         | A | 0.295 | 0.852 | [0.649,1.117] | 0.246 | 0.950 | [0.584,1.544] | 0.835 | 1.115 | [0.66,1.883]  | 0.684 | 0.510 |
| rs2286007  | WNK1         | T | 0.053 | 1.037 | [0.624,1.722] | 0.890 | 0.825 | [0.292,2.332] | 0.717 | 0.796 | [0.265,2.388] | 0.684 | 0.921 |
| rs17680881 | TACC3        | A | 0.240 | 0.815 | [0.61,1.089]  | 0.166 | 0.914 | [0.549,1.521] | 0.729 | 1.121 | [0.646,1.948] | 0.684 | 0.378 |
| rs875119   | TTR          | G | 0.049 | 0.959 | [0.561,1.638] | 0.877 | 0.758 | [0.262,2.196] | 0.610 | 0.791 | [0.255,2.451] | 0.684 | 0.874 |
| rs4988515  | IGFBP1       | T | 0.072 | 0.914 | [0.568,1.472] | 0.712 | 0.754 | [0.318,1.785] | 0.520 | 0.824 | [0.325,2.092] | 0.684 | 0.780 |
| rs2850992  | PPP3CA       | C | 0.264 | 0.904 | [0.691,1.184] | 0.465 | 0.809 | [0.489,1.338] | 0.409 | 0.895 | [0.523,1.53]  | 0.684 | 0.586 |
| rs1035130  | IL18R1       | A | 0.251 | 0.925 | [0.705,1.214] | 0.574 | 0.826 | [0.497,1.374] | 0.462 | 0.893 | [0.518,1.54]  | 0.685 | 0.683 |
| rs43037    | PON2         | C | 0.349 | 1.000 | [0.786,1.273] | 0.998 | 1.103 | [0.709,1.715] | 0.664 | 1.102 | [0.687,1.768] | 0.686 | 0.908 |
| rs3204953  | LOC100128477 | A | 0.111 | 1.068 | [0.741,1.538] | 0.725 | 0.918 | [0.461,1.828] | 0.808 | 0.860 | [0.413,1.788] | 0.686 | 0.899 |
| rs3813867  | CYP2E1       | C | 0.043 | 1.099 | [0.647,1.867] | 0.727 | 1.335 | [0.553,3.224] | 0.520 | 1.215 | [0.471,3.137] | 0.687 | 0.789 |
| rs4766003  | C12orf32     | A | 0.412 | 1.074 | [0.843,1.368] | 0.563 | 1.183 | [0.762,1.838] | 0.454 | 1.102 | [0.688,1.766] | 0.687 | 0.674 |
| rs762623   | CDKN1A       | A | 0.128 | 0.856 | [0.595,1.232] | 0.402 | 0.738 | [0.377,1.445] | 0.375 | 0.862 | [0.419,1.775] | 0.687 | 0.517 |
| rs348459   | ALDH1A1      | G | 0.067 | 1.166 | [0.727,1.871] | 0.524 | 0.959 | [0.392,2.345] | 0.927 | 0.822 | [0.317,2.135] | 0.688 | 0.803 |
| rs35597    | ABCC1        | A | 0.436 | 0.808 | [0.635,1.028] | 0.083 | 0.890 | [0.575,1.377] | 0.601 | 1.101 | [0.688,1.761] | 0.688 | 0.213 |
| rs1058932  | CYP2C8       | T | 0.211 | 1.140 | [0.855,1.52]  | 0.374 | 1.016 | [0.603,1.713] | 0.952 | 0.892 | [0.51,1.56]   | 0.688 | 0.672 |
| rs894817   | IGF2R        | A | 0.333 | 0.757 | [0.583,0.983] | 0.037 | 0.838 | [0.529,1.33]  | 0.454 | 1.107 | [0.672,1.825] | 0.689 | 0.101 |
| rs2908004  | WNT16        | C | 0.490 | 1.095 | [0.859,1.394] | 0.464 | 0.995 | [0.643,1.54]  | 0.982 | 0.909 | [0.569,1.451] | 0.689 | 0.759 |
| rs2973015  | GHR          | G | 0.450 | 0.855 | [0.673,1.087] | 0.201 | 0.938 | [0.617,1.425] | 0.763 | 1.096 | [0.698,1.722] | 0.690 | 0.438 |
| rs737693   | MMP12        | T | 0.117 | 0.985 | [0.68,1.427]  | 0.936 | 1.142 | [0.582,2.238] | 0.700 | 1.159 | [0.561,2.394] | 0.690 | 0.920 |
| rs77905    | DBH          | T | 0.461 | 1.081 | [0.859,1.361] | 0.506 | 0.987 | [0.649,1.501] | 0.951 | 0.913 | [0.582,1.431] | 0.691 | 0.792 |
| rs12347    | MTRR         | T | 0.142 | 0.955 | [0.666,1.369] | 0.801 | 1.091 | [0.596,1.997] | 0.779 | 1.143 | [0.592,2.206] | 0.691 | 0.920 |
| rs1395     | SLC5A6       | G | 0.381 | 1.067 | [0.823,1.382] | 0.625 | 1.180 | [0.743,1.873] | 0.484 | 1.106 | [0.672,1.819] | 0.691 | 0.724 |
| rs4986993  | NAT1         | T | 0.298 | 0.869 | [0.663,1.139] | 0.308 | 0.962 | [0.605,1.53]  | 0.869 | 1.107 | [0.669,1.831] | 0.692 | 0.595 |
| rs639838   | PGR          | C | 0.332 | 0.961 | [0.749,1.234] | 0.756 | 0.870 | [0.549,1.379] | 0.553 | 0.905 | [0.551,1.485] | 0.692 | 0.815 |
| rs1891073  | CYP2C8       | C | 0.351 | 0.979 | [0.765,1.254] | 0.869 | 0.887 | [0.56,1.404]  | 0.609 | 0.906 | [0.554,1.481] | 0.693 | 0.873 |
| rs1934953  | CYP2C8       | G | 0.350 | 0.979 | [0.765,1.254] | 0.869 | 0.887 | [0.56,1.404]  | 0.609 | 0.906 | [0.554,1.481] | 0.693 | 0.873 |
| rs1048943  | CYP1A1       | G | 0.052 | 0.935 | [0.499,1.754] | 0.835 | 1.166 | [0.424,3.208] | 0.766 | 1.247 | [0.417,3.723] | 0.693 | 0.924 |
| rs1802904  | ATR          | G | 0.128 | 1.006 | [0.704,1.438] | 0.973 | 1.154 | [0.612,2.177] | 0.658 | 1.147 | [0.581,2.266] | 0.693 | 0.906 |
| rs7102464  | SBF2         | T | 0.080 | 0.961 | [0.619,1.491] | 0.859 | 0.802 | [0.345,1.864] | 0.608 | 0.835 | [0.339,2.053] | 0.694 | 0.871 |
| rs1126672  | ADH4         | T | 0.237 | 0.843 | [0.643,1.104] | 0.214 | 0.937 | [0.573,1.534] | 0.797 | 1.112 | [0.655,1.891] | 0.694 | 0.460 |
| rs7393105  | ABCC2        | C | 0.424 | 1.154 | [0.9,1.48]    | 0.258 | 1.050 | [0.678,1.628] | 0.826 | 0.910 | [0.567,1.459] | 0.695 | 0.526 |
| rs963065   | PPP3CA       | G | 0.493 | 1.152 | [0.903,1.469] | 0.256 | 1.048 | [0.675,1.627] | 0.835 | 0.910 | [0.567,1.46]  | 0.695 | 0.523 |
| rs730365   | PON2         | T | 0.157 | 1.010 | [0.731,1.395] | 0.954 | 1.138 | [0.655,1.975] | 0.646 | 1.127 | [0.619,2.051] | 0.695 | 0.900 |

|            |           |   |       |       |               |       |       |               |       |       |               |       |       |
|------------|-----------|---|-------|-------|---------------|-------|-------|---------------|-------|-------|---------------|-------|-------|
| rs543573   | SETX      | T | 0.262 | 1.129 | [0.856,1.488] | 0.389 | 1.016 | [0.619,1.667] | 0.951 | 0.900 | [0.529,1.529] | 0.696 | 0.689 |
| rs246217   | ABCC1     | A | 0.140 | 0.881 | [0.634,1.223] | 0.448 | 0.769 | [0.406,1.457] | 0.421 | 0.873 | [0.443,1.723] | 0.696 | 0.582 |
| rs8187706  | ABCC2     | A | 0.022 | 0.754 | [0.286,1.989] | 0.568 | 1.012 | [0.291,3.517] | 0.985 | 1.342 | [0.306,5.887] | 0.697 | 0.846 |
| rs1884725  | XDH       | A | 0.229 | 1.201 | [0.909,1.587] | 0.197 | 1.078 | [0.648,1.794] | 0.771 | 0.898 | [0.521,1.548] | 0.697 | 0.432 |
| rs474320   | PGR       | A | 0.130 | 1.104 | [0.783,1.556] | 0.574 | 1.257 | [0.681,2.321] | 0.464 | 1.139 | [0.59,2.198]  | 0.698 | 0.689 |
| rs3738000  | NEK11     | A | 0.382 | 0.914 | [0.711,1.175] | 0.481 | 0.828 | [0.523,1.313] | 0.423 | 0.907 | [0.553,1.486] | 0.698 | 0.606 |
| rs5082     | APOA2     | C | 0.350 | 0.952 | [0.748,1.211] | 0.688 | 0.867 | [0.557,1.349] | 0.526 | 0.910 | [0.567,1.463] | 0.698 | 0.777 |
| rs3212218  | IL12B     | T | 0.252 | 0.918 | [0.665,1.267] | 0.604 | 1.035 | [0.595,1.8]   | 0.903 | 1.127 | [0.615,2.065] | 0.698 | 0.859 |
| rs11770116 | IMPDH1    | T | 0.312 | 1.103 | [0.859,1.416] | 0.443 | 1.002 | [0.636,1.577] | 0.995 | 0.908 | [0.558,1.478] | 0.698 | 0.741 |
| rs5005     | ADM       | G | 0.014 | 1.013 | [0.383,2.68]  | 0.979 | 0.672 | [0.093,4.835] | 0.693 | 0.663 | [0.083,5.314] | 0.699 | 0.922 |
| rs228843   | NFATC2    | A | 0.479 | 1.065 | [0.841,1.35]  | 0.601 | 0.974 | [0.64,1.483]  | 0.903 | 0.915 | [0.582,1.438] | 0.699 | 0.855 |
| rs2277448  | ALG11     | G | 0.370 | 1.199 | [0.931,1.543] | 0.159 | 1.317 | [0.845,2.051] | 0.224 | 1.098 | [0.683,1.767] | 0.699 | 0.222 |
| rs2256871  | CYP2C9    | C | 0.015 | 0.986 | [0.339,2.867] | 0.980 | 1.361 | [0.338,5.484] | 0.664 | 1.380 | [0.27,7.065]  | 0.699 | 0.907 |
| rs2227928  | ATR       | T | 0.400 | 0.859 | [0.676,1.092] | 0.215 | 0.943 | [0.606,1.467] | 0.795 | 1.098 | [0.684,1.761] | 0.699 | 0.462 |
| rs10409482 | VRK3      | T | 0.030 | 1.092 | [0.51,2.34]   | 0.820 | 1.370 | [0.506,3.712] | 0.536 | 1.254 | [0.398,3.954] | 0.699 | 0.819 |
| rs2260655  | DAK       | G | 0.100 | 1.263 | [0.751,2.124] | 0.379 | 1.056 | [0.466,2.393] | 0.896 | 0.837 | [0.338,2.069] | 0.699 | 0.680 |
| rs3093056  | CSF1      | A | 0.338 | 1.002 | [0.778,1.29]  | 0.987 | 0.908 | [0.568,1.452] | 0.687 | 0.906 | [0.549,1.497] | 0.700 | 0.920 |
| rs5970     | F11       | C | 0.156 | 0.989 | [0.698,1.403] | 0.952 | 0.863 | [0.448,1.661] | 0.658 | 0.872 | [0.433,1.755] | 0.701 | 0.907 |
| rs3741883  | NUAK1     | C | 0.198 | 1.078 | [0.796,1.459] | 0.629 | 1.210 | [0.697,2.099] | 0.498 | 1.123 | [0.622,2.028] | 0.701 | 0.735 |
| rs1799794  | XRCC3     | G | 0.204 | 1.271 | [0.959,1.683] | 0.095 | 1.408 | [0.863,2.297] | 0.170 | 1.108 | [0.655,1.875] | 0.701 | 0.132 |
| rs1801320  | LOC729029 | C | 0.116 | 1.220 | [0.858,1.736] | 0.268 | 1.068 | [0.562,2.027] | 0.842 | 0.875 | [0.442,1.733] | 0.701 | 0.541 |
| rs7759     | DPAGT1    | G | 0.327 | 0.934 | [0.724,1.205] | 0.600 | 0.847 | [0.532,1.35]  | 0.485 | 0.907 | [0.55,1.494]  | 0.701 | 0.714 |
| rs6005     | F5        | G | 0.014 | 2.070 | [0.709,6.045] | 0.183 | 1.446 | [0.272,7.687] | 0.665 | 0.699 | [0.112,4.376] | 0.702 | 0.402 |
| rs518276   | MRE11A    | A | 0.406 | 1.066 | [0.844,1.346] | 0.592 | 0.976 | [0.641,1.487] | 0.911 | 0.916 | [0.583,1.438] | 0.703 | 0.851 |
| rs2230590  | MST1R     | A | 0.482 | 0.909 | [0.714,1.157] | 0.438 | 0.993 | [0.652,1.514] | 0.975 | 1.093 | [0.693,1.724] | 0.703 | 0.738 |
| rs554715   | MRE11A    | C | 0.322 | 1.010 | [0.786,1.297] | 0.941 | 1.109 | [0.709,1.734] | 0.651 | 1.098 | [0.679,1.777] | 0.703 | 0.903 |
| rs4647688  | CASP3     | A | 0.151 | 1.169 | [0.859,1.591] | 0.322 | 1.035 | [0.572,1.874] | 0.909 | 0.886 | [0.473,1.658] | 0.704 | 0.612 |
| rs2145853  | ABCC2     | A | 0.409 | 1.256 | [0.968,1.63]  | 0.086 | 1.142 | [0.722,1.805] | 0.571 | 0.909 | [0.555,1.489] | 0.704 | 0.217 |
| rs2271012  | ATF6      | T | 0.110 | 1.163 | [0.816,1.655] | 0.404 | 1.017 | [0.53,1.951]  | 0.959 | 0.875 | [0.438,1.748] | 0.705 | 0.704 |
| rs2144908  | HNF4A     | A | 0.196 | 0.881 | [0.658,1.181] | 0.397 | 0.982 | [0.583,1.657] | 0.947 | 1.115 | [0.635,1.957] | 0.705 | 0.698 |
| rs989902   | PTPN13    | C | 0.465 | 1.101 | [0.862,1.407] | 0.440 | 1.205 | [0.779,1.865] | 0.402 | 1.095 | [0.685,1.749] | 0.706 | 0.567 |
| rs2041049  | DBF4      | C | 0.040 | 1.120 | [0.604,2.077] | 0.720 | 0.871 | [0.256,2.967] | 0.825 | 0.778 | [0.211,2.866] | 0.706 | 0.905 |
| rs3748022  | IKBKE     | T | 0.199 | 0.771 | [0.572,1.04]  | 0.089 | 0.687 | [0.39,1.208]  | 0.192 | 0.890 | [0.487,1.629] | 0.706 | 0.129 |
| rs3136516  | F2        | A | 0.454 | 1.179 | [0.923,1.506] | 0.186 | 1.292 | [0.829,2.014] | 0.258 | 1.095 | [0.682,1.76]  | 0.706 | 0.267 |
| rs3764006  | SLCO1B3   | C | 0.210 | 1.402 | [1.013,1.942] | 0.042 | 1.571 | [0.906,2.725] | 0.108 | 1.121 | [0.62,2.026]  | 0.707 | 0.054 |
| rs4647001  | JUN       | G | 0.405 | 0.865 | [0.677,1.107] | 0.249 | 0.947 | [0.613,1.463] | 0.806 | 1.094 | [0.685,1.749] | 0.707 | 0.513 |
| rs16880254 | TPMT      | G | 0.051 | 0.887 | [0.515,1.526] | 0.664 | 1.062 | [0.455,2.478] | 0.890 | 1.198 | [0.466,3.075] | 0.708 | 0.892 |
| rs2069526  | CYP1A2    | G | 0.049 | 0.972 | [0.564,1.674] | 0.918 | 1.164 | [0.492,2.756] | 0.730 | 1.198 | [0.466,3.078] | 0.708 | 0.930 |
| rs584589   | NGFR      | G | 0.138 | 1.106 | [0.788,1.551] | 0.560 | 1.246 | [0.698,2.226] | 0.457 | 1.127 | [0.603,2.107] | 0.709 | 0.677 |
| rs2040968  | HGF       | C | 0.242 | 0.994 | [0.755,1.308] | 0.963 | 1.097 | [0.677,1.777] | 0.706 | 1.104 | [0.656,1.86]  | 0.709 | 0.927 |
| rs2228527  | ERCC6     | G | 0.207 | 0.978 | [0.726,1.318] | 0.886 | 1.089 | [0.645,1.838] | 0.749 | 1.113 | [0.634,1.952] | 0.709 | 0.933 |

|            |          |   |       |       |               |       |       |               |       |       |               |       |       |
|------------|----------|---|-------|-------|---------------|-------|-------|---------------|-------|-------|---------------|-------|-------|
| rs16846208 | ATF6     | T | 0.110 | 1.163 | [0.817,1.656] | 0.402 | 1.020 | [0.532,1.956] | 0.953 | 0.877 | [0.439,1.751] | 0.709 | 0.702 |
| rs10263741 | ABCB1    | T | 0.017 | 1.407 | [0.543,3.647] | 0.482 | 1.818 | [0.545,6.063] | 0.331 | 1.292 | [0.335,4.977] | 0.709 | 0.553 |
| rs2294038  | ARHGEF10 | C | 0.136 | 0.857 | [0.604,1.217] | 0.388 | 0.972 | [0.529,1.785] | 0.926 | 1.134 | [0.586,2.193] | 0.710 | 0.689 |
| rs6474491  | STAR     | C | 0.247 | 0.698 | [0.526,0.925] | 0.012 | 0.773 | [0.471,1.268] | 0.308 | 1.107 | [0.647,1.896] | 0.710 | 0.034 |
| rs1374993  | C8orf42  | G | 0.332 | 0.982 | [0.765,1.261] | 0.889 | 0.894 | [0.56,1.426]  | 0.637 | 0.910 | [0.552,1.498] | 0.710 | 0.892 |
| rs1572983  | BAAT     | C | 0.346 | 0.910 | [0.708,1.171] | 0.466 | 0.829 | [0.522,1.315] | 0.425 | 0.910 | [0.555,1.494] | 0.710 | 0.597 |
| rs689462   | PTGS2    | C | 0.065 | 1.096 | [0.658,1.825] | 0.726 | 1.287 | [0.598,2.772] | 0.519 | 1.175 | [0.501,2.755] | 0.711 | 0.786 |
| rs1059293  | IFNGR2   | C | 0.464 | 0.938 | [0.74,1.188]  | 0.593 | 0.859 | [0.558,1.323] | 0.491 | 0.916 | [0.577,1.456] | 0.712 | 0.715 |
| rs1048977  | CDA      | T | 0.330 | 0.997 | [0.774,1.285] | 0.982 | 0.908 | [0.571,1.443] | 0.684 | 0.911 | [0.555,1.496] | 0.712 | 0.920 |
| rs5936     | PROC     | G | 0.284 | 0.877 | [0.676,1.137] | 0.322 | 0.796 | [0.492,1.288] | 0.352 | 0.908 | [0.542,1.52]  | 0.713 | 0.443 |
| rs7172     | PSMB4    | G | 0.296 | 1.144 | [0.885,1.479] | 0.305 | 1.041 | [0.651,1.664] | 0.866 | 0.910 | [0.551,1.504] | 0.713 | 0.591 |
| rs3731151  | XPC      | A | 0.267 | 0.976 | [0.749,1.273] | 0.860 | 1.074 | [0.668,1.728] | 0.767 | 1.100 | [0.66,1.835]  | 0.714 | 0.934 |
| rs3749442  | ABCC5    | T | 0.194 | 0.834 | [0.612,1.137] | 0.251 | 0.933 | [0.536,1.623] | 0.806 | 1.119 | [0.615,2.036] | 0.714 | 0.515 |
| rs1132776  | ABCC5    | T | 0.401 | 1.000 | [0.789,1.267] | 1.000 | 1.088 | [0.715,1.656] | 0.694 | 1.088 | [0.693,1.707] | 0.714 | 0.924 |
| rs1805061  | SLC7A7   | C | 0.160 | 1.168 | [0.852,1.601] | 0.335 | 1.042 | [0.587,1.849] | 0.889 | 0.892 | [0.483,1.646] | 0.715 | 0.629 |
| rs2078486  | TP53     | A | 0.124 | 1.182 | [0.823,1.697] | 0.366 | 1.038 | [0.544,1.981] | 0.910 | 0.878 | [0.438,1.76]  | 0.715 | 0.664 |
| rs2147668  | RFC3     | G | 0.173 | 1.117 | [0.806,1.549] | 0.506 | 1.252 | [0.709,2.211] | 0.438 | 1.121 | [0.608,2.065] | 0.715 | 0.636 |
| rs1776148  | EXO1     | A | 0.347 | 1.087 | [0.855,1.381] | 0.496 | 1.184 | [0.772,1.816] | 0.439 | 1.090 | [0.688,1.725] | 0.715 | 0.628 |
| rs12254557 | MBL2     | C | 0.023 | 1.453 | [0.643,3.285] | 0.370 | 1.822 | [0.622,5.336] | 0.274 | 1.254 | [0.372,4.229] | 0.715 | 0.431 |
| rs601391   | MRE11A   | T | 0.324 | 1.001 | [0.779,1.287] | 0.992 | 1.095 | [0.7,1.714]   | 0.690 | 1.094 | [0.676,1.771] | 0.715 | 0.923 |
| rs7525957  | FRAP1    | C | 0.322 | 1.086 | [0.835,1.414] | 0.538 | 0.988 | [0.616,1.585] | 0.961 | 0.910 | [0.548,1.511] | 0.715 | 0.820 |
| rs7797834  | CYP51A1  | G | 0.389 | 0.939 | [0.741,1.191] | 0.605 | 1.022 | [0.67,1.559]  | 0.920 | 1.088 | [0.69,1.714]  | 0.716 | 0.862 |
| rs1061494  | TNC      | C | 0.465 | 0.946 | [0.745,1.2]   | 0.646 | 1.030 | [0.671,1.58]  | 0.893 | 1.089 | [0.687,1.726] | 0.717 | 0.882 |
| rs3821207  | IL1RL2   | G | 0.308 | 0.833 | [0.643,1.079] | 0.166 | 0.914 | [0.573,1.457] | 0.706 | 1.097 | [0.664,1.813] | 0.717 | 0.376 |
| rs3759207  | MGST1    | G | 0.303 | 1.086 | [0.845,1.397] | 0.519 | 1.188 | [0.757,1.865] | 0.454 | 1.094 | [0.674,1.775] | 0.717 | 0.652 |
| rs3218097  | CCND3    | T | 0.216 | 0.788 | [0.589,1.055] | 0.109 | 0.706 | [0.404,1.233] | 0.221 | 0.896 | [0.493,1.627] | 0.717 | 0.162 |
| rs1800169  | CNTF     | A | 0.120 | 0.918 | [0.636,1.326] | 0.649 | 1.047 | [0.542,2.02]  | 0.892 | 1.140 | [0.56,2.318]  | 0.718 | 0.884 |
| rs916864   | PON3     | T | 0.202 | 0.760 | [0.56,1.032]  | 0.079 | 0.849 | [0.488,1.476] | 0.561 | 1.116 | [0.615,2.027] | 0.718 | 0.200 |
| rs328      | LPL      | G | 0.102 | 0.768 | [0.515,1.145] | 0.195 | 0.883 | [0.44,1.771]  | 0.725 | 1.149 | [0.539,2.449] | 0.718 | 0.424 |
| rs5744934  | POLE     | G | 0.120 | 1.135 | [0.805,1.601] | 0.470 | 1.276 | [0.707,2.303] | 0.419 | 1.124 | [0.595,2.123] | 0.719 | 0.601 |
| rs865242   | DPYD     | G | 0.254 | 0.999 | [0.77,1.297]  | 0.994 | 0.909 | [0.562,1.469] | 0.697 | 0.910 | [0.544,1.521] | 0.719 | 0.926 |
| rs7689099  | NEIL3    | G | 0.101 | 0.911 | [0.616,1.349] | 0.643 | 0.785 | [0.366,1.685] | 0.535 | 0.862 | [0.383,1.939] | 0.719 | 0.766 |
| rs743616   | ARSA     | G | 0.486 | 0.924 | [0.734,1.163] | 0.500 | 1.002 | [0.663,1.514] | 0.991 | 1.085 | [0.696,1.691] | 0.719 | 0.792 |
| rs299284   | HMMR     | T | 0.118 | 0.873 | [0.602,1.265] | 0.473 | 0.761 | [0.379,1.526] | 0.441 | 0.872 | [0.412,1.844] | 0.719 | 0.609 |
| rs2076655  | FRAP1    | G | 0.373 | 0.975 | [0.753,1.262] | 0.845 | 0.889 | [0.556,1.421] | 0.623 | 0.912 | [0.552,1.508] | 0.720 | 0.879 |
| rs11547160 | TCF7L1   | T | 0.054 | 1.819 | [1.131,2.926] | 0.014 | 1.532 | [0.62,3.783]  | 0.355 | 0.842 | [0.328,2.159] | 0.720 | 0.042 |
| rs2287620  | ABCB11   | A | 0.403 | 0.871 | [0.683,1.111] | 0.265 | 0.949 | [0.613,1.469] | 0.813 | 1.090 | [0.681,1.744] | 0.721 | 0.536 |
| rs13418420 | UGT1A10  | C | 0.252 | 0.857 | [0.647,1.136] | 0.283 | 0.774 | [0.46,1.303]  | 0.335 | 0.903 | [0.517,1.579] | 0.721 | 0.398 |
| rs2267131  | XBP1     | C | 0.114 | 0.812 | [0.544,1.211] | 0.308 | 0.936 | [0.453,1.934] | 0.859 | 1.153 | [0.527,2.523] | 0.722 | 0.594 |
| rs1934954  | CYP2C9   | G | 0.057 | 0.912 | [0.55,1.512]  | 0.721 | 0.747 | [0.265,2.104] | 0.581 | 0.819 | [0.273,2.458] | 0.722 | 0.822 |
| rs2659543  | PPP3CA   | G | 0.105 | 0.748 | [0.457,1.222] | 0.246 | 0.634 | [0.275,1.463] | 0.285 | 0.848 | [0.341,2.111] | 0.723 | 0.333 |

|            |          |   |       |       |               |       |       |               |       |       |               |       |       |
|------------|----------|---|-------|-------|---------------|-------|-------|---------------|-------|-------|---------------|-------|-------|
| rs1800668  | GPX1     | T | 0.276 | 0.767 | [0.585,1.004] | 0.054 | 0.695 | [0.419,1.153] | 0.159 | 0.907 | [0.528,1.559] | 0.724 | 0.078 |
| rs10176426 | UGT1A10  | T | 0.089 | 0.792 | [0.52,1.206]  | 0.277 | 0.913 | [0.441,1.892] | 0.806 | 1.153 | [0.522,2.547] | 0.725 | 0.550 |
| rs880324   | NFATC2   | A | 0.231 | 1.301 | [0.985,1.718] | 0.064 | 1.179 | [0.707,1.968] | 0.528 | 0.907 | [0.525,1.566] | 0.725 | 0.168 |
| rs4252228  | TAF9     | T | 0.399 | 1.012 | [0.796,1.287] | 0.921 | 0.929 | [0.595,1.452] | 0.748 | 0.918 | [0.57,1.478]  | 0.725 | 0.940 |
| rs3797896  | MSH3     | G | 0.091 | 1.346 | [0.914,1.982] | 0.133 | 1.522 | [0.795,2.912] | 0.205 | 1.131 | [0.57,2.245]  | 0.725 | 0.199 |
| rs1801133  | MTHFR    | T | 0.286 | 0.864 | [0.665,1.123] | 0.275 | 0.787 | [0.483,1.282] | 0.336 | 0.911 | [0.54,1.535]  | 0.725 | 0.393 |
| rs7903344  | CHUK     | C | 0.457 | 1.014 | [0.796,1.291] | 0.910 | 1.103 | [0.712,1.709] | 0.661 | 1.088 | [0.68,1.741]  | 0.726 | 0.907 |
| rs7802773  | ABCB1    | A | 0.488 | 1.143 | [0.895,1.459] | 0.283 | 1.240 | [0.813,1.89]  | 0.317 | 1.085 | [0.687,1.712] | 0.727 | 0.390 |
| rs3738136  | PINK1    | A | 0.059 | 0.637 | [0.362,1.121] | 0.118 | 0.519 | [0.178,1.514] | 0.230 | 0.814 | [0.257,2.581] | 0.727 | 0.173 |
| rs1413239  | DPYD     | T | 0.358 | 0.955 | [0.748,1.218] | 0.710 | 0.878 | [0.565,1.363] | 0.562 | 0.919 | [0.573,1.475] | 0.728 | 0.809 |
| rs1171276  | LEPR     | G | 0.216 | 0.915 | [0.678,1.235] | 0.561 | 1.011 | [0.602,1.697] | 0.968 | 1.105 | [0.63,1.937]  | 0.728 | 0.838 |
| rs2582783  | HMGCS2   | A | 0.271 | 0.909 | [0.69,1.199]  | 0.500 | 0.825 | [0.497,1.372] | 0.459 | 0.908 | [0.526,1.567] | 0.729 | 0.641 |
| rs8044995  | NFATC3   | A | 0.197 | 0.940 | [0.703,1.256] | 0.675 | 1.035 | [0.626,1.71]  | 0.894 | 1.101 | [0.639,1.896] | 0.729 | 0.899 |
| rs144848   | BRCA2    | G | 0.252 | 1.182 | [0.907,1.54]  | 0.216 | 1.080 | [0.669,1.743] | 0.754 | 0.913 | [0.548,1.524] | 0.729 | 0.460 |
| rs12720356 | TYK2     | G | 0.074 | 0.867 | [0.558,1.348] | 0.528 | 1.008 | [0.459,2.216] | 0.984 | 1.162 | [0.496,2.724] | 0.729 | 0.815 |
| rs2239330  | ABCC1    | T | 0.259 | 0.941 | [0.717,1.236] | 0.663 | 1.033 | [0.631,1.69]  | 0.897 | 1.098 | [0.647,1.86]  | 0.730 | 0.892 |
| rs994502   | MYO3A    | C | 0.269 | 1.032 | [0.781,1.364] | 0.824 | 1.134 | [0.692,1.858] | 0.618 | 1.098 | [0.645,1.871] | 0.730 | 0.873 |
| rs7120118  | NR1H3    | C | 0.331 | 1.165 | [0.911,1.489] | 0.224 | 1.071 | [0.685,1.674] | 0.764 | 0.919 | [0.57,1.483]  | 0.730 | 0.474 |
| rs770087   | DUSP6    | G | 0.233 | 1.025 | [0.768,1.369] | 0.867 | 1.126 | [0.686,1.848] | 0.639 | 1.099 | [0.643,1.878] | 0.731 | 0.891 |
| rs3177427  | GSTZ1    | A | 0.314 | 1.041 | [0.815,1.329] | 0.750 | 0.956 | [0.609,1.502] | 0.846 | 0.919 | [0.567,1.49]  | 0.732 | 0.924 |
| rs165599   | COMT     | G | 0.401 | 1.035 | [0.808,1.326] | 0.783 | 1.125 | [0.725,1.745] | 0.600 | 1.086 | [0.677,1.743] | 0.732 | 0.854 |
| rs500079   | PPP1R15A | C | 0.313 | 0.961 | [0.711,1.299] | 0.796 | 0.870 | [0.514,1.47]  | 0.602 | 0.905 | [0.511,1.601] | 0.732 | 0.857 |
| rs1881421  | ALK      | G | 0.440 | 1.059 | [0.844,1.328] | 0.621 | 1.143 | [0.762,1.713] | 0.519 | 1.079 | [0.699,1.667] | 0.732 | 0.748 |
| rs1549760  | CDK5     | T | 0.259 | 0.877 | [0.673,1.143] | 0.332 | 0.959 | [0.596,1.543] | 0.863 | 1.093 | [0.656,1.824] | 0.732 | 0.624 |
| rs8018462  | SLC7A7   | A | 0.462 | 0.885 | [0.698,1.121] | 0.311 | 0.958 | [0.625,1.468] | 0.845 | 1.083 | [0.685,1.713] | 0.733 | 0.598 |
| rs1405655  | NR1H2    | C | 0.348 | 1.259 | [0.99,1.601]  | 0.060 | 1.163 | [0.76,1.779]  | 0.487 | 0.924 | [0.585,1.458] | 0.733 | 0.157 |
| rs1951765  | FKBP1A   | A | 0.232 | 1.054 | [0.804,1.384] | 0.702 | 1.156 | [0.703,1.901] | 0.567 | 1.097 | [0.645,1.865] | 0.734 | 0.811 |
| rs217434   | NPC1L1   | G | 0.193 | 0.942 | [0.694,1.277] | 0.699 | 0.847 | [0.478,1.501] | 0.569 | 0.899 | [0.488,1.658] | 0.734 | 0.809 |
| rs1199039  | TIE1     | C | 0.349 | 0.837 | [0.655,1.071] | 0.157 | 0.909 | [0.584,1.415] | 0.673 | 1.086 | [0.675,1.748] | 0.734 | 0.357 |
| rs2231926  | FLJ10213 | A | 0.464 | 1.072 | [0.842,1.366] | 0.572 | 0.990 | [0.645,1.52]  | 0.963 | 0.923 | [0.581,1.466] | 0.734 | 0.845 |
| rs1361600  | F3       | G | 0.482 | 0.969 | [0.769,1.221] | 0.790 | 1.047 | [0.691,1.587] | 0.829 | 1.080 | [0.691,1.689] | 0.734 | 0.934 |
| rs1565684  | NAT2     | C | 0.486 | 1.040 | [0.822,1.315] | 0.745 | 0.961 | [0.629,1.468] | 0.855 | 0.925 | [0.587,1.455] | 0.735 | 0.923 |
| rs2275622  | CYP2C8   | T | 0.349 | 0.990 | [0.773,1.268] | 0.936 | 0.910 | [0.575,1.438] | 0.685 | 0.919 | [0.563,1.5]   | 0.735 | 0.921 |
| rs1802059  | MTRR     | A | 0.343 | 1.089 | [0.853,1.39]  | 0.495 | 1.002 | [0.639,1.57]  | 0.993 | 0.920 | [0.569,1.488] | 0.735 | 0.789 |
| rs6737156  | DGUOK    | C | 0.057 | 1.015 | [0.603,1.708] | 0.954 | 0.847 | [0.32,2.244]  | 0.739 | 0.835 | [0.293,2.378] | 0.735 | 0.941 |
| rs853778   | ABCB11   | A | 0.450 | 1.100 | [0.873,1.386] | 0.420 | 1.016 | [0.663,1.558] | 0.940 | 0.924 | [0.585,1.46]  | 0.736 | 0.722 |
| rs25487    | XRCC1    | A | 0.304 | 0.978 | [0.756,1.266] | 0.868 | 1.065 | [0.674,1.684] | 0.787 | 1.089 | [0.664,1.783] | 0.736 | 0.944 |
| rs941798   | PTPN1    | G | 0.420 | 1.051 | [0.828,1.333] | 0.683 | 0.971 | [0.635,1.487] | 0.894 | 0.925 | [0.585,1.46]  | 0.737 | 0.903 |
| rs2234719  | ABCG1    | T | 0.273 | 0.816 | [0.623,1.069] | 0.140 | 0.745 | [0.455,1.219] | 0.242 | 0.913 | [0.537,1.552] | 0.737 | 0.206 |
| rs11549147 | FDFT1    | G | 0.068 | 1.042 | [0.667,1.629] | 0.856 | 0.890 | [0.373,2.127] | 0.793 | 0.854 | [0.339,2.151] | 0.738 | 0.943 |
| rs1805329  | RAD23B   | T | 0.185 | 1.017 | [0.754,1.371] | 0.914 | 0.915 | [0.513,1.633] | 0.764 | 0.900 | [0.486,1.666] | 0.738 | 0.946 |

|            |            |   |       |       |               |       |       |               |       |       |               |       |       |
|------------|------------|---|-------|-------|---------------|-------|-------|---------------|-------|-------|---------------|-------|-------|
| rs5491     | ICAM1      | T | 0.040 | 1.864 | [0.97,3.581]  | 0.062 | 2.240 | [0.824,6.092] | 0.114 | 1.202 | [0.408,3.545] | 0.739 | 0.081 |
| rs2261144  | CYP2A7     | G | 0.299 | 1.075 | [0.841,1.373] | 0.563 | 1.165 | [0.749,1.813] | 0.498 | 1.084 | [0.675,1.74]  | 0.739 | 0.707 |
| rs10017300 | Intergenic | C | 0.289 | 0.942 | [0.723,1.229] | 0.661 | 1.028 | [0.639,1.654] | 0.910 | 1.091 | [0.653,1.82]  | 0.740 | 0.895 |
| rs10493753 | SPATA1     | G | 0.070 | 1.028 | [0.613,1.724] | 0.915 | 1.199 | [0.527,2.723] | 0.665 | 1.165 | [0.471,2.885] | 0.741 | 0.910 |
| rs1341160  | CYP2C8     | A | 0.116 | 1.202 | [0.845,1.71]  | 0.307 | 1.066 | [0.544,2.089] | 0.853 | 0.887 | [0.435,1.807] | 0.741 | 0.593 |
| rs1051740  | EPHX1      | C | 0.300 | 0.998 | [0.77,1.292]  | 0.985 | 0.915 | [0.566,1.479] | 0.717 | 0.917 | [0.549,1.533] | 0.741 | 0.936 |
| rs2515644  | CYP2E1     | A | 0.307 | 0.868 | [0.654,1.152] | 0.327 | 0.952 | [0.572,1.583] | 0.849 | 1.096 | [0.635,1.894] | 0.741 | 0.618 |
| rs3138045  | NFKBIA     | G | 0.218 | 0.802 | [0.6,1.074]   | 0.138 | 0.882 | [0.526,1.479] | 0.634 | 1.099 | [0.627,1.925] | 0.741 | 0.320 |
| rs2231142  | ABCG2      | A | 0.101 | 1.049 | [0.715,1.537] | 0.808 | 0.919 | [0.437,1.932] | 0.824 | 0.877 | [0.399,1.926] | 0.743 | 0.939 |
| rs2070151  | ATF6       | T | 0.111 | 1.090 | [0.76,1.564]  | 0.639 | 0.970 | [0.502,1.872] | 0.927 | 0.889 | [0.441,1.794] | 0.743 | 0.884 |
| rs1137100  | LEPR       | G | 0.264 | 1.191 | [0.922,1.539] | 0.180 | 1.095 | [0.682,1.758] | 0.707 | 0.919 | [0.555,1.523] | 0.744 | 0.400 |
| rs133417   | MCM5       | C | 0.072 | 1.095 | [0.669,1.791] | 0.718 | 1.263 | [0.576,2.769] | 0.559 | 1.154 | [0.489,2.726] | 0.744 | 0.812 |
| rs3824120  | MYC        | A | 0.121 | 1.210 | [0.841,1.739] | 0.304 | 1.074 | [0.55,2.1]    | 0.834 | 0.888 | [0.436,1.811] | 0.744 | 0.589 |
| rs1952467  | CYP2E1     | T | 0.307 | 0.872 | [0.657,1.157] | 0.341 | 0.955 | [0.574,1.588] | 0.858 | 1.095 | [0.634,1.892] | 0.744 | 0.635 |
| rs2259458  | AKR1B1     | T | 0.284 | 0.899 | [0.691,1.169] | 0.425 | 0.978 | [0.61,1.568]  | 0.926 | 1.088 | [0.654,1.81]  | 0.745 | 0.727 |
| rs540199   | ANKRD49    | G | 0.328 | 1.122 | [0.876,1.438] | 0.360 | 1.034 | [0.651,1.643] | 0.886 | 0.922 | [0.563,1.508] | 0.745 | 0.658 |
| rs1537234  | GSTM3      | T | 0.394 | 1.023 | [0.807,1.298] | 0.849 | 1.104 | [0.721,1.691] | 0.650 | 1.078 | [0.683,1.704] | 0.746 | 0.895 |
| rs2279238  | NR1H3      | A | 0.207 | 1.154 | [0.863,1.543] | 0.333 | 1.261 | [0.769,2.068] | 0.359 | 1.092 | [0.64,1.864]  | 0.746 | 0.462 |
| rs753381   | PLCG1      | A | 0.374 | 1.019 | [0.794,1.309] | 0.880 | 1.104 | [0.705,1.728] | 0.666 | 1.083 | [0.669,1.752] | 0.746 | 0.908 |
| rs7218866  | PSMB6      | T | 0.038 | 0.564 | [0.262,1.213] | 0.143 | 0.431 | [0.095,1.946] | 0.274 | 0.764 | [0.149,3.926] | 0.747 | 0.211 |
| rs398734   | CD44       | A | 0.303 | 1.287 | [0.997,1.66]  | 0.053 | 1.185 | [0.743,1.891] | 0.475 | 0.921 | [0.56,1.515]  | 0.747 | 0.140 |
| rs1049897  | MGP        | T | 0.371 | 0.962 | [0.756,1.226] | 0.756 | 1.039 | [0.674,1.601] | 0.863 | 1.079 | [0.678,1.718] | 0.747 | 0.930 |
| rs1866928  | C15orf42   | A | 0.357 | 0.963 | [0.75,1.236]  | 0.767 | 0.888 | [0.561,1.406] | 0.613 | 0.922 | [0.564,1.509] | 0.748 | 0.857 |
| rs5361     | SELE       | C | 0.085 | 1.057 | [0.707,1.58]  | 0.788 | 0.922 | [0.421,2.018] | 0.839 | 0.873 | [0.38,2.004]  | 0.748 | 0.937 |
| rs6949295  | IMPDH1     | C | 0.239 | 1.006 | [0.764,1.325] | 0.964 | 1.096 | [0.676,1.776] | 0.710 | 1.089 | [0.646,1.835] | 0.749 | 0.933 |
| rs6031     | F5         | T | 0.014 | 0.829 | [0.268,2.562] | 0.745 | 1.115 | [0.228,5.44]  | 0.893 | 1.344 | [0.22,8.213]  | 0.749 | 0.933 |
| rs3795375  | KIAA1804   | T | 0.191 | 1.105 | [0.827,1.475] | 0.499 | 1.006 | [0.589,1.718] | 0.981 | 0.911 | [0.514,1.614] | 0.749 | 0.794 |
| rs1052536  | LIG3       | T | 0.400 | 1.147 | [0.904,1.454] | 0.258 | 1.061 | [0.68,1.657]  | 0.793 | 0.925 | [0.575,1.488] | 0.749 | 0.524 |
| rs1185193  | SETX       | A | 0.210 | 1.100 | [0.826,1.464] | 0.514 | 1.199 | [0.733,1.961] | 0.471 | 1.090 | [0.643,1.848] | 0.750 | 0.665 |
| rs480562   | ABCB11     | A | 0.461 | 1.142 | [0.906,1.44]  | 0.261 | 1.062 | [0.702,1.608] | 0.775 | 0.930 | [0.596,1.451] | 0.750 | 0.528 |
| rs1405938  | CASP3      | A | 0.158 | 1.193 | [0.88,1.615]  | 0.256 | 1.080 | [0.607,1.923] | 0.794 | 0.906 | [0.492,1.666] | 0.750 | 0.522 |
| rs878201   | Intergenic | A | 0.309 | 0.852 | [0.657,1.104] | 0.225 | 0.924 | [0.578,1.478] | 0.742 | 1.085 | [0.655,1.8]   | 0.751 | 0.472 |
| rs3775289  | DCK        | A | 0.116 | 0.685 | [0.407,1.153] | 0.154 | 0.586 | [0.242,1.418] | 0.236 | 0.856 | [0.325,2.251] | 0.752 | 0.217 |
| rs2706338  | RAD50      | T | 0.177 | 1.091 | [0.808,1.473] | 0.570 | 0.987 | [0.549,1.774] | 0.965 | 0.905 | [0.486,1.683] | 0.752 | 0.845 |
| rs1678339  | ABCC4      | T | 0.080 | 0.869 | [0.557,1.356] | 0.536 | 0.993 | [0.463,2.13]  | 0.986 | 1.143 | [0.498,2.621] | 0.753 | 0.824 |
| rs1799800  | ERCC4      | A | 0.249 | 0.947 | [0.723,1.239] | 0.690 | 1.029 | [0.637,1.662] | 0.908 | 1.087 | [0.648,1.822] | 0.753 | 0.910 |
| rs2069833  | IL6        | C | 0.323 | 1.181 | [0.931,1.499] | 0.171 | 1.093 | [0.693,1.723] | 0.702 | 0.925 | [0.571,1.501] | 0.753 | 0.384 |
| rs1272744  | MRE11A     | C | 0.399 | 1.043 | [0.825,1.318] | 0.727 | 0.970 | [0.636,1.479] | 0.886 | 0.930 | [0.591,1.463] | 0.754 | 0.923 |
| rs1805312  | ALAD       | C | 0.077 | 0.937 | [0.605,1.453] | 0.772 | 0.809 | [0.339,1.928] | 0.633 | 0.863 | [0.343,2.174] | 0.755 | 0.868 |
| rs7181886  | CYP19A1    | G | 0.110 | 1.207 | [0.828,1.76]  | 0.328 | 1.079 | [0.56,2.077]  | 0.821 | 0.894 | [0.441,1.811] | 0.755 | 0.617 |
| rs567754   | BHMT       | T | 0.295 | 0.891 | [0.687,1.157] | 0.387 | 0.967 | [0.6,1.56]    | 0.891 | 1.085 | [0.649,1.813] | 0.755 | 0.688 |

|            |          |   |       |       |               |       |       |               |       |       |               |       |       |
|------------|----------|---|-------|-------|---------------|-------|-------|---------------|-------|-------|---------------|-------|-------|
| rs7103126  | MYEOV    | C | 0.300 | 0.992 | [0.747,1.318] | 0.957 | 0.908 | [0.541,1.525] | 0.717 | 0.916 | [0.526,1.595] | 0.755 | 0.936 |
| rs35683    | GHRL     | A | 0.430 | 1.138 | [0.902,1.435] | 0.276 | 1.059 | [0.693,1.616] | 0.792 | 0.930 | [0.591,1.465] | 0.756 | 0.549 |
| rs4665766  | EFR3B    | T | 0.269 | 0.953 | [0.73,1.244]  | 0.722 | 0.878 | [0.543,1.421] | 0.597 | 0.922 | [0.55,1.544]  | 0.757 | 0.835 |
| rs973874   | NAT2     | T | 0.016 | 0.878 | [0.342,2.259] | 0.788 | 0.633 | [0.09,4.442]  | 0.645 | 0.720 | [0.09,5.791]  | 0.758 | 0.877 |
| rs1760212  | DPYD     | T | 0.387 | 1.006 | [0.789,1.282] | 0.963 | 0.934 | [0.603,1.448] | 0.761 | 0.929 | [0.58,1.488]  | 0.759 | 0.951 |
| rs1143623  | IL1B     | C | 0.266 | 1.107 | [0.852,1.439] | 0.445 | 1.021 | [0.629,1.658] | 0.932 | 0.922 | [0.549,1.548] | 0.759 | 0.747 |
| rs853772   | ABCB11   | A | 0.499 | 0.855 | [0.678,1.079] | 0.187 | 0.917 | [0.603,1.394] | 0.686 | 1.073 | [0.684,1.683] | 0.760 | 0.408 |
| rs1126671  | ADH4     | A | 0.269 | 0.925 | [0.715,1.198] | 0.555 | 1.001 | [0.625,1.605] | 0.996 | 1.082 | [0.652,1.796] | 0.760 | 0.837 |
| rs2227930  | ATR      | T | 0.400 | 0.862 | [0.678,1.095] | 0.223 | 0.927 | [0.597,1.438] | 0.735 | 1.076 | [0.672,1.723] | 0.760 | 0.469 |
| rs1043641  | ACBD3    | A | 0.146 | 1.122 | [0.822,1.531] | 0.468 | 1.020 | [0.573,1.814] | 0.947 | 0.909 | [0.492,1.678] | 0.760 | 0.768 |
| rs2266782  | FMO3     | A | 0.415 | 1.119 | [0.886,1.415] | 0.346 | 1.200 | [0.793,1.815] | 0.389 | 1.072 | [0.686,1.674] | 0.761 | 0.490 |
| rs2020869  | FMO2     | G | 0.149 | 1.145 | [0.831,1.576] | 0.408 | 1.041 | [0.586,1.847] | 0.892 | 0.909 | [0.493,1.677] | 0.761 | 0.710 |
| rs3747258  | CERK     | A | 0.097 | 1.382 | [0.895,2.134] | 0.144 | 1.557 | [0.767,3.162] | 0.221 | 1.127 | [0.523,2.428] | 0.761 | 0.209 |
| rs864373   | ABCB11   | T | 0.467 | 1.114 | [0.887,1.399] | 0.353 | 1.041 | [0.689,1.571] | 0.850 | 0.934 | [0.601,1.452] | 0.762 | 0.649 |
| rs1063169  | FOS      | T | 0.138 | 1.065 | [0.746,1.52]  | 0.729 | 1.188 | [0.614,2.298] | 0.610 | 1.115 | [0.551,2.258] | 0.762 | 0.844 |
| rs619824   | CYP17A1  | T | 0.493 | 1.040 | [0.821,1.317] | 0.748 | 0.968 | [0.631,1.487] | 0.884 | 0.932 | [0.589,1.475] | 0.763 | 0.932 |
| rs3795374  | KIAA1804 | A | 0.201 | 1.062 | [0.798,1.415] | 0.679 | 0.974 | [0.577,1.645] | 0.922 | 0.917 | [0.523,1.608] | 0.763 | 0.907 |
| rs12500797 | PTPN13   | A | 0.080 | 1.519 | [1.02,2.262]  | 0.040 | 1.342 | [0.624,2.886] | 0.451 | 0.884 | [0.395,1.974] | 0.763 | 0.110 |
| rs17655    | ERCC5    | G | 0.258 | 1.137 | [0.877,1.475] | 0.332 | 1.052 | [0.652,1.697] | 0.837 | 0.925 | [0.555,1.541] | 0.764 | 0.623 |
| rs2273642  | NFATC2   | A | 0.278 | 1.272 | [0.985,1.642] | 0.065 | 1.179 | [0.743,1.872] | 0.484 | 0.927 | [0.565,1.52]  | 0.764 | 0.165 |
| rs207910   | XRCC5    | G | 0.149 | 0.943 | [0.677,1.313] | 0.727 | 0.854 | [0.469,1.556] | 0.606 | 0.906 | [0.476,1.725] | 0.764 | 0.842 |
| rs3025039  | VEGFA    | T | 0.144 | 1.096 | [0.786,1.528] | 0.588 | 1.208 | [0.668,2.185] | 0.531 | 1.102 | [0.584,2.079] | 0.764 | 0.741 |
| rs15922    | TAF11    | G | 0.047 | 0.876 | [0.503,1.526] | 0.640 | 0.724 | [0.222,2.355] | 0.591 | 0.826 | [0.237,2.878] | 0.764 | 0.795 |
| rs6998760  | PSKH2    | A | 0.317 | 1.076 | [0.839,1.379] | 0.563 | 0.998 | [0.627,1.587] | 0.992 | 0.927 | [0.565,1.522] | 0.765 | 0.843 |
| rs2847609  | TYMS     | G | 0.369 | 0.976 | [0.758,1.258] | 0.853 | 0.906 | [0.577,1.424] | 0.670 | 0.928 | [0.57,1.511]  | 0.765 | 0.905 |
| rs12441817 | CYP1A1   | C | 0.130 | 1.093 | [0.781,1.529] | 0.605 | 0.987 | [0.527,1.848] | 0.968 | 0.903 | [0.464,1.761] | 0.766 | 0.869 |
| rs1060584  | FLJ10213 | C | 0.462 | 1.068 | [0.839,1.359] | 0.594 | 0.996 | [0.648,1.53]  | 0.985 | 0.933 | [0.587,1.481] | 0.767 | 0.863 |
| rs2380165  | BLM      | G | 0.342 | 0.834 | [0.645,1.077] | 0.164 | 0.774 | [0.492,1.219] | 0.269 | 0.929 | [0.569,1.516] | 0.768 | 0.247 |
| rs2464196  | HNF1A    | T | 0.269 | 1.056 | [0.81,1.377]  | 0.686 | 1.142 | [0.704,1.852] | 0.590 | 1.081 | [0.644,1.815] | 0.768 | 0.819 |
| rs3024496  | IL10     | C | 0.447 | 0.907 | [0.716,1.148] | 0.416 | 0.846 | [0.549,1.302] | 0.447 | 0.933 | [0.587,1.482] | 0.768 | 0.579 |
| rs6945306  | STK31    | C | 0.299 | 0.865 | [0.67,1.118]  | 0.267 | 0.933 | [0.585,1.488] | 0.770 | 1.078 | [0.653,1.782] | 0.768 | 0.535 |
| rs907807   | IGF1R    | G | 0.165 | 1.151 | [0.835,1.588] | 0.390 | 1.259 | [0.724,2.189] | 0.414 | 1.094 | [0.602,1.986] | 0.769 | 0.543 |
| rs854544   | PPP1R9A  | T | 0.418 | 0.833 | [0.65,1.067]  | 0.148 | 0.896 | [0.569,1.413] | 0.637 | 1.076 | [0.661,1.75]  | 0.769 | 0.339 |
| rs2472299  | CYP1A1   | A | 0.312 | 0.985 | [0.763,1.272] | 0.911 | 1.060 | [0.672,1.673] | 0.801 | 1.076 | [0.658,1.758] | 0.770 | 0.958 |
| rs849526   | NRP2     | G | 0.464 | 0.927 | [0.726,1.184] | 0.546 | 0.995 | [0.639,1.548] | 0.982 | 1.073 | [0.667,1.724] | 0.772 | 0.832 |
| rs4987164  | DMC1     | C | 0.038 | 0.988 | [0.533,1.83]  | 0.969 | 0.823 | [0.262,2.586] | 0.738 | 0.833 | [0.241,2.874] | 0.772 | 0.946 |
| rs2234721  | ABCG1    | T | 0.329 | 1.105 | [0.855,1.429] | 0.447 | 1.025 | [0.639,1.646] | 0.917 | 0.928 | [0.56,1.539]  | 0.772 | 0.749 |
| rs3218619  | FAS      | A | 0.020 | 1.631 | [0.761,3.495] | 0.208 | 1.944 | [0.651,5.809] | 0.234 | 1.192 | [0.363,3.92]  | 0.772 | 0.291 |
| rs215050   | ABCC1    | A | 0.147 | 1.079 | [0.793,1.469] | 0.627 | 0.988 | [0.558,1.749] | 0.966 | 0.915 | [0.498,1.681] | 0.774 | 0.883 |
| rs1041163  | VCAM1    | C | 0.173 | 0.996 | [0.73,1.359]  | 0.980 | 0.912 | [0.522,1.594] | 0.748 | 0.916 | [0.503,1.669] | 0.774 | 0.949 |
| rs1010844  | CART     | C | 0.210 | 0.868 | [0.638,1.18]  | 0.366 | 0.796 | [0.462,1.372] | 0.412 | 0.918 | [0.509,1.654] | 0.775 | 0.517 |

|            |          |   |       |       |               |       |       |               |       |       |                |       |       |
|------------|----------|---|-------|-------|---------------|-------|-------|---------------|-------|-------|----------------|-------|-------|
| rs462779   | REV3L    | C | 0.284 | 0.980 | [0.755,1.271] | 0.876 | 1.052 | [0.668,1.658] | 0.826 | 1.074 | [0.657,1.756]  | 0.775 | 0.959 |
| rs2606241  | C18orf56 | T | 0.315 | 1.038 | [0.806,1.338] | 0.772 | 1.112 | [0.718,1.724] | 0.634 | 1.071 | [0.667,1.721]  | 0.775 | 0.871 |
| rs1051296  | SLC19A1  | G | 0.434 | 0.836 | [0.651,1.074] | 0.161 | 0.896 | [0.577,1.39]  | 0.624 | 1.072 | [0.666,1.725]  | 0.775 | 0.357 |
| rs2069837  | IL6      | G | 0.076 | 1.344 | [0.875,2.064] | 0.177 | 1.507 | [0.725,3.131] | 0.272 | 1.121 | [0.511,2.459]  | 0.776 | 0.270 |
| rs2069824  | IL6      | C | 0.092 | 0.932 | [0.623,1.395] | 0.733 | 0.825 | [0.376,1.813] | 0.632 | 0.885 | [0.382,2.051]  | 0.776 | 0.856 |
| rs4148946  | CHST3    | C | 0.383 | 0.822 | [0.643,1.052] | 0.119 | 0.766 | [0.486,1.208] | 0.252 | 0.932 | [0.573,1.516]  | 0.776 | 0.190 |
| rs7009367  | C8orf68  | G | 0.226 | 0.858 | [0.642,1.147] | 0.300 | 0.928 | [0.564,1.528] | 0.769 | 1.082 | [0.629,1.861]  | 0.777 | 0.578 |
| rs2071421  | ARSA     | G | 0.155 | 1.118 | [0.801,1.561] | 0.512 | 1.230 | [0.657,2.305] | 0.518 | 1.101 | [0.566,2.142]  | 0.778 | 0.691 |
| rs1047768  | ERCC5    | T | 0.395 | 1.180 | [0.941,1.48]  | 0.152 | 1.256 | [0.836,1.886] | 0.272 | 1.064 | [0.688,1.646]  | 0.779 | 0.239 |
| rs2227929  | ATR      | C | 0.343 | 1.231 | [0.955,1.587] | 0.109 | 1.320 | [0.838,2.079] | 0.232 | 1.072 | [0.658,1.746]  | 0.779 | 0.172 |
| rs714629   | AICDA    | G | 0.496 | 0.913 | [0.724,1.151] | 0.440 | 0.972 | [0.644,1.469] | 0.894 | 1.065 | [0.684,1.661]  | 0.780 | 0.742 |
| rs1891072  | CYP2C8   | C | 0.347 | 0.981 | [0.766,1.257] | 0.880 | 0.915 | [0.578,1.446] | 0.703 | 0.932 | [0.571,1.523]  | 0.780 | 0.925 |
| rs2401751  | PTPN21   | T | 0.345 | 0.888 | [0.692,1.139] | 0.351 | 0.827 | [0.521,1.314] | 0.422 | 0.932 | [0.567,1.53]   | 0.780 | 0.511 |
| rs540742   | GIPC2    | C | 0.223 | 1.099 | [0.835,1.446] | 0.502 | 1.018 | [0.615,1.685] | 0.946 | 0.926 | [0.541,1.586]  | 0.780 | 0.797 |
| rs662      | PON1     | G | 0.396 | 0.904 | [0.711,1.15]  | 0.411 | 0.845 | [0.543,1.315] | 0.457 | 0.935 | [0.583,1.5]    | 0.781 | 0.583 |
| rs2229086  |          | G | 0.056 | 1.430 | [0.881,2.32]  | 0.148 | 1.623 | [0.699,3.768] | 0.259 | 1.135 | [0.464,2.776]  | 0.781 | 0.237 |
| rs2070180  | HCLS1    | A | 0.244 | 1.082 | [0.832,1.406] | 0.556 | 1.163 | [0.724,1.867] | 0.533 | 1.075 | [0.647,1.785]  | 0.781 | 0.725 |
| rs5982     | F13A1    | T | 0.200 | 0.920 | [0.684,1.239] | 0.584 | 0.846 | [0.482,1.483] | 0.558 | 0.919 | [0.504,1.676]  | 0.782 | 0.752 |
| rs2010963  | VEGFA    | C | 0.309 | 1.019 | [0.796,1.305] | 0.879 | 1.089 | [0.703,1.687] | 0.703 | 1.068 | [0.667,1.71]   | 0.783 | 0.925 |
| rs3212254  | ADCY4    | A | 0.074 | 1.245 | [0.805,1.923] | 0.325 | 1.106 | [0.502,2.437] | 0.803 | 0.888 | [0.383,2.063]  | 0.783 | 0.612 |
| rs2234700  | EPHX1    | C | 0.013 | 0.411 | [0.089,1.906] | 0.256 | 0.586 | [0.07,4.908]  | 0.622 | 1.425 | [0.114,17.795] | 0.783 | 0.483 |
| rs557806   | PPP1R15A | G | 0.212 | 0.841 | [0.602,1.177] | 0.313 | 0.921 | [0.506,1.677] | 0.788 | 1.095 | [0.573,2.09]   | 0.784 | 0.595 |
| rs1014666  | MRE11A   | C | 0.467 | 1.031 | [0.821,1.296] | 0.790 | 0.970 | [0.641,1.467] | 0.884 | 0.940 | [0.603,1.465]  | 0.784 | 0.949 |
| rs1946235  | GPX3     | C | 0.159 | 1.047 | [0.744,1.475] | 0.790 | 0.955 | [0.515,1.769] | 0.883 | 0.912 | [0.469,1.772]  | 0.785 | 0.949 |
| rs316132   | GSTA4    | G | 0.433 | 1.246 | [0.98,1.584]  | 0.073 | 1.169 | [0.761,1.796] | 0.477 | 0.938 | [0.591,1.489]  | 0.786 | 0.179 |
| rs1800286  | FANCA    | A | 0.332 | 0.867 | [0.672,1.119] | 0.272 | 0.809 | [0.505,1.294] | 0.376 | 0.933 | [0.563,1.544]  | 0.787 | 0.415 |
| rs4775936  | CYP19A1  | T | 0.412 | 0.946 | [0.742,1.207] | 0.658 | 1.009 | [0.655,1.556] | 0.967 | 1.066 | [0.67,1.698]   | 0.787 | 0.901 |
| rs2237051  | EGF      | A | 0.472 | 1.050 | [0.825,1.337] | 0.692 | 1.120 | [0.723,1.737] | 0.612 | 1.067 | [0.666,1.709]  | 0.787 | 0.833 |
| rs503931   | ABCB11   | T | 0.500 | 1.184 | [0.942,1.487] | 0.148 | 1.113 | [0.736,1.683] | 0.610 | 0.941 | [0.604,1.466]  | 0.787 | 0.335 |
| rs7089422  | CYP17A1  | T | 0.153 | 1.080 | [0.786,1.484] | 0.635 | 0.992 | [0.555,1.771] | 0.978 | 0.918 | [0.493,1.709]  | 0.788 | 0.889 |
| rs2075800  | HSPA1L   | A | 0.278 | 0.964 | [0.745,1.246] | 0.777 | 1.032 | [0.646,1.651] | 0.894 | 1.071 | [0.648,1.772]  | 0.788 | 0.946 |
| rs3803258  | SLC10A2  | C | 0.179 | 0.756 | [0.551,1.038] | 0.084 | 0.824 | [0.46,1.476]  | 0.515 | 1.090 | [0.582,2.041]  | 0.789 | 0.205 |
| rs3176260  | FGF17    | T | 0.106 | 0.799 | [0.539,1.182] | 0.261 | 0.715 | [0.336,1.523] | 0.385 | 0.896 | [0.399,2.011]  | 0.790 | 0.404 |
| rs1566734  | PTPRJ    | G | 0.143 | 0.858 | [0.611,1.203] | 0.374 | 0.779 | [0.403,1.506] | 0.458 | 0.909 | [0.449,1.839]  | 0.790 | 0.548 |
| rs11848612 | ADSSL1   | G | 0.465 | 1.083 | [0.85,1.38]   | 0.519 | 1.017 | [0.661,1.565] | 0.939 | 0.939 | [0.59,1.494]   | 0.790 | 0.812 |
| rs551754   | ABCB11   | A | 0.499 | 0.852 | [0.678,1.071] | 0.170 | 0.905 | [0.598,1.369] | 0.635 | 1.062 | [0.681,1.656]  | 0.790 | 0.374 |
| rs2039447  | DPYD     | C | 0.359 | 0.963 | [0.755,1.228] | 0.761 | 0.903 | [0.58,1.405]  | 0.651 | 0.938 | [0.583,1.508]  | 0.791 | 0.876 |
| rs4148301  | UGT2A1   | A | 0.085 | 0.972 | [0.634,1.489] | 0.895 | 1.083 | [0.515,2.277] | 0.834 | 1.114 | [0.5,2.484]    | 0.792 | 0.965 |
| rs9606756  | TCN2     | G | 0.123 | 1.142 | [0.814,1.6]   | 0.442 | 1.240 | [0.699,2.199] | 0.462 | 1.086 | [0.587,2.011]  | 0.792 | 0.614 |
| rs2137680  | IGF1R    | T | 0.358 | 1.031 | [0.797,1.334] | 0.813 | 1.101 | [0.701,1.73]  | 0.676 | 1.067 | [0.656,1.738]  | 0.793 | 0.902 |
| rs7190823  | FANCA    | C | 0.468 | 1.326 | [1.049,1.677] | 0.018 | 1.247 | [0.813,1.913] | 0.312 | 0.940 | [0.595,1.487]  | 0.793 | 0.049 |

|            |          |   |       |       |               |       |       |               |       |       |               |       |       |
|------------|----------|---|-------|-------|---------------|-------|-------|---------------|-------|-------|---------------|-------|-------|
| rs17841292 | EEF2K    | G | 0.078 | 0.918 | [0.59,1.428]  | 0.705 | 0.810 | [0.334,1.967] | 0.642 | 0.882 | [0.345,2.257] | 0.794 | 0.852 |
| rs7185307  | TNFRSF17 | C | 0.331 | 1.083 | [0.834,1.407] | 0.550 | 1.013 | [0.635,1.618] | 0.956 | 0.936 | [0.566,1.545] | 0.795 | 0.836 |
| rs1048691  | 9-Mar    | T | 0.251 | 0.955 | [0.71,1.284]  | 0.759 | 0.883 | [0.51,1.528]  | 0.656 | 0.925 | [0.512,1.67]  | 0.795 | 0.876 |
| rs2384937  | ABCC1    | C | 0.120 | 1.095 | [0.771,1.556] | 0.611 | 1.196 | [0.642,2.229] | 0.572 | 1.092 | [0.561,2.126] | 0.795 | 0.778 |
| rs10896380 | IGHMBP2  | G | 0.205 | 0.910 | [0.672,1.231] | 0.540 | 0.987 | [0.553,1.76]  | 0.964 | 1.085 | [0.585,2.012] | 0.796 | 0.828 |
| rs3093106  | CYP4F2   | G | 0.202 | 1.139 | [0.856,1.516] | 0.372 | 1.060 | [0.638,1.762] | 0.821 | 0.931 | [0.54,1.604]  | 0.796 | 0.668 |
| rs6463247  | PPIA     | C | 0.295 | 1.252 | [0.96,1.632]  | 0.098 | 1.171 | [0.726,1.888] | 0.517 | 0.935 | [0.563,1.556] | 0.797 | 0.235 |
| rs497692   | ABCB11   | A | 0.499 | 1.185 | [0.943,1.489] | 0.144 | 1.119 | [0.74,1.691]  | 0.595 | 0.944 | [0.606,1.47]  | 0.798 | 0.326 |
| rs1130499  | PTPRN2   | A | 0.350 | 1.313 | [1.024,1.683] | 0.032 | 1.399 | [0.889,2.2]   | 0.147 | 1.065 | [0.656,1.73]  | 0.798 | 0.051 |
| rs762551   | CYP1A2   | C | 0.316 | 1.018 | [0.789,1.313] | 0.892 | 1.085 | [0.686,1.717] | 0.726 | 1.066 | [0.651,1.746] | 0.799 | 0.937 |
| rs10520114 | RAD50    | C | 0.181 | 0.982 | [0.728,1.325] | 0.906 | 0.907 | [0.509,1.614] | 0.739 | 0.923 | [0.5,1.705]   | 0.799 | 0.943 |
| rs1573496  | ADH7     | G | 0.081 | 0.839 | [0.545,1.293] | 0.426 | 0.935 | [0.435,2.009] | 0.862 | 1.114 | [0.487,2.545] | 0.799 | 0.727 |
| rs3742106  | ABCC4    | C | 0.389 | 0.990 | [0.778,1.258] | 0.931 | 0.932 | [0.607,1.432] | 0.747 | 0.942 | [0.593,1.496] | 0.799 | 0.949 |
| rs2057768  | IL4R     | A | 0.295 | 0.916 | [0.704,1.191] | 0.512 | 0.978 | [0.612,1.563] | 0.925 | 1.068 | [0.644,1.772] | 0.799 | 0.806 |
| rs288326   | FRZB     | A | 0.094 | 0.735 | [0.478,1.13]  | 0.161 | 0.652 | [0.274,1.552] | 0.333 | 0.887 | [0.351,2.242] | 0.800 | 0.266 |
| rs799923   | BRCA1    | A | 0.179 | 0.823 | [0.6,1.129]   | 0.227 | 0.891 | [0.504,1.577] | 0.693 | 1.083 | [0.585,2.004] | 0.800 | 0.468 |
| rs6597801  | LHPP     | A | 0.100 | 1.136 | [0.781,1.654] | 0.505 | 1.249 | [0.629,2.479] | 0.525 | 1.099 | [0.53,2.281]  | 0.800 | 0.691 |
| rs4646227  | SLC15A1  | C | 0.039 | 0.748 | [0.404,1.388] | 0.358 | 0.869 | [0.303,2.493] | 0.794 | 1.161 | [0.366,3.682] | 0.800 | 0.648 |
| rs9885672  | FIG4     | C | 0.262 | 0.932 | [0.689,1.263] | 0.651 | 1.004 | [0.591,1.705] | 0.989 | 1.076 | [0.608,1.906] | 0.801 | 0.900 |
| rs10775648 | HUNK     | T | 0.202 | 0.801 | [0.588,1.092] | 0.161 | 0.865 | [0.497,1.506] | 0.609 | 1.080 | [0.593,1.967] | 0.801 | 0.354 |
| rs5320     | DBH      | A | 0.076 | 1.064 | [0.677,1.672] | 0.788 | 0.951 | [0.421,2.147] | 0.904 | 0.894 | [0.373,2.143] | 0.802 | 0.952 |
| rs934197   | APOB     | A | 0.291 | 1.109 | [0.857,1.435] | 0.433 | 1.181 | [0.744,1.875] | 0.481 | 1.065 | [0.65,1.747]  | 0.802 | 0.616 |
| rs2273697  | ABCC2    | A | 0.193 | 0.881 | [0.648,1.197] | 0.417 | 0.949 | [0.55,1.637]  | 0.852 | 1.078 | [0.6,1.938]   | 0.802 | 0.717 |
| rs1856908  | CYP2C9   | T | 0.382 | 1.077 | [0.845,1.372] | 0.550 | 1.144 | [0.735,1.78]  | 0.552 | 1.062 | [0.662,1.706] | 0.803 | 0.732 |
| rs2228001  | XPC      | C | 0.365 | 1.139 | [0.896,1.447] | 0.288 | 1.207 | [0.785,1.857] | 0.391 | 1.060 | [0.669,1.68]  | 0.803 | 0.443 |
| rs9282787  | MTRR     | C | 0.183 | 1.024 | [0.757,1.386] | 0.876 | 1.104 | [0.64,1.905]  | 0.723 | 1.077 | [0.6,1.934]   | 0.803 | 0.934 |
| rs430397   | HSPA5    | A | 0.092 | 1.225 | [0.815,1.841] | 0.330 | 1.350 | [0.661,2.756] | 0.410 | 1.102 | [0.513,2.371] | 0.803 | 0.492 |
| rs2285460  | BLM      | T | 0.202 | 0.860 | [0.636,1.162] | 0.325 | 0.924 | [0.548,1.558] | 0.766 | 1.075 | [0.61,1.892]  | 0.803 | 0.609 |
| rs4129472  | GHR      | G | 0.164 | 1.260 | [0.924,1.717] | 0.144 | 1.165 | [0.652,2.083] | 0.606 | 0.925 | [0.499,1.713] | 0.803 | 0.329 |
| rs1801265  | DPYD     | C | 0.260 | 0.753 | [0.574,0.988] | 0.041 | 0.805 | [0.496,1.306] | 0.380 | 1.069 | [0.632,1.806] | 0.804 | 0.102 |
| rs700518   | CYP19A1  | G | 0.450 | 0.935 | [0.736,1.187] | 0.579 | 0.990 | [0.646,1.518] | 0.965 | 1.060 | [0.67,1.676]  | 0.804 | 0.857 |
| rs6413419  | CYP2E1   | A | 0.048 | 1.068 | [0.587,1.94]  | 0.830 | 0.933 | [0.35,2.483]  | 0.889 | 0.874 | [0.298,2.559] | 0.806 | 0.963 |
| rs1138358  | BCL2A1   | G | 0.344 | 0.995 | [0.776,1.277] | 0.971 | 0.936 | [0.595,1.474] | 0.776 | 0.941 | [0.578,1.531] | 0.806 | 0.960 |
| rs7778377  | STARD3NL | T | 0.172 | 1.016 | [0.751,1.375] | 0.918 | 1.092 | [0.638,1.868] | 0.749 | 1.075 | [0.604,1.911] | 0.807 | 0.949 |
| rs894157   | C15orf42 | C | 0.090 | 0.942 | [0.619,1.432] | 0.779 | 0.845 | [0.373,1.914] | 0.686 | 0.897 | [0.375,2.145] | 0.807 | 0.897 |
| rs1169288  | HNF1A    | G | 0.286 | 1.135 | [0.856,1.506] | 0.379 | 1.058 | [0.621,1.802] | 0.836 | 0.932 | [0.528,1.644] | 0.807 | 0.677 |
| rs2227914  | DMC1     | G | 0.024 | 1.027 | [0.422,2.498] | 0.953 | 1.231 | [0.342,4.433] | 0.750 | 1.199 | [0.28,5.135]  | 0.807 | 0.950 |
| rs2072330  | ALDH3A1  | A | 0.344 | 1.091 | [0.856,1.389] | 0.482 | 1.027 | [0.65,1.621]  | 0.910 | 0.941 | [0.579,1.531] | 0.807 | 0.781 |
| rs1126526  | ATF3     | T | 0.176 | 1.050 | [0.771,1.428] | 0.758 | 1.130 | [0.645,1.98]  | 0.668 | 1.077 | [0.593,1.956] | 0.808 | 0.885 |
| rs1396080  | CCNA2    | C | 0.387 | 1.011 | [0.795,1.287] | 0.927 | 1.071 | [0.7,1.638]   | 0.753 | 1.059 | [0.67,1.674]  | 0.808 | 0.951 |
| rs905594   | ATF6     | T | 0.461 | 1.078 | [0.843,1.379] | 0.548 | 1.016 | [0.647,1.594] | 0.946 | 0.942 | [0.582,1.525] | 0.808 | 0.835 |

|            |          |   |       |       |               |       |       |               |       |       |               |       |       |
|------------|----------|---|-------|-------|---------------|-------|-------|---------------|-------|-------|---------------|-------|-------|
| rs5888     | SCARB1   | T | 0.416 | 0.937 | [0.737,1.191] | 0.595 | 0.884 | [0.573,1.365] | 0.579 | 0.944 | [0.593,1.504] | 0.808 | 0.772 |
| rs3743372  | C15orf42 | A | 0.297 | 0.978 | [0.756,1.264] | 0.864 | 1.041 | [0.649,1.67]  | 0.868 | 1.064 | [0.642,1.765] | 0.809 | 0.968 |
| rs139884   | SOX10    | A | 0.331 | 1.020 | [0.793,1.311] | 0.879 | 1.083 | [0.685,1.713] | 0.732 | 1.062 | [0.65,1.736]  | 0.809 | 0.938 |
| rs1800788  | FGB      | T | 0.194 | 0.963 | [0.718,1.291] | 0.800 | 1.034 | [0.602,1.776] | 0.905 | 1.074 | [0.602,1.916] | 0.810 | 0.957 |
| rs2241280  | FGF6     | C | 0.412 | 0.901 | [0.707,1.149] | 0.401 | 0.954 | [0.619,1.47]  | 0.830 | 1.058 | [0.664,1.686] | 0.811 | 0.699 |
| rs2152092  | MMS19    | C | 0.460 | 1.106 | [0.874,1.4]   | 0.402 | 1.168 | [0.769,1.776] | 0.466 | 1.056 | [0.673,1.659] | 0.812 | 0.581 |
| rs2687074  | CYP3A7   | C | 0.038 | 0.923 | [0.456,1.865] | 0.823 | 0.793 | [0.257,2.443] | 0.686 | 0.860 | [0.247,2.985] | 0.812 | 0.908 |
| rs2927922  | PDSS1    | T | 0.356 | 1.064 | [0.83,1.363]  | 0.625 | 1.002 | [0.632,1.588] | 0.994 | 0.942 | [0.575,1.542] | 0.812 | 0.886 |
| rs2124459  | CBS      | C | 0.390 | 1.049 | [0.826,1.333] | 0.692 | 0.991 | [0.639,1.537] | 0.969 | 0.945 | [0.591,1.511] | 0.812 | 0.921 |
| rs3730931  | LIG1     | G | 0.149 | 0.865 | [0.615,1.215] | 0.402 | 0.932 | [0.527,1.65]  | 0.809 | 1.078 | [0.578,2.01]  | 0.813 | 0.698 |
| rs853785   | ABCB11   | G | 0.474 | 1.110 | [0.884,1.393] | 0.370 | 1.052 | [0.698,1.587] | 0.808 | 0.948 | [0.61,1.473]  | 0.813 | 0.665 |
| rs10146482 | NEK9     | T | 0.466 | 1.054 | [0.832,1.335] | 0.664 | 1.114 | [0.725,1.712] | 0.623 | 1.057 | [0.667,1.675] | 0.813 | 0.828 |
| rs982424   | MTTP     | C | 0.097 | 0.851 | [0.558,1.298] | 0.453 | 0.936 | [0.449,1.949] | 0.860 | 1.100 | [0.496,2.441] | 0.814 | 0.752 |
| rs708155   | CD81     | A | 0.193 | 1.428 | [1.075,1.897] | 0.014 | 1.524 | [0.914,2.541] | 0.106 | 1.067 | [0.62,1.836]  | 0.814 | 0.023 |
| rs2237060  | RAD50    | C | 0.345 | 1.009 | [0.782,1.301] | 0.944 | 1.072 | [0.669,1.718] | 0.773 | 1.062 | [0.642,1.758] | 0.814 | 0.959 |
| rs6427630  | ATF6     | G | 0.112 | 1.217 | [0.853,1.736] | 0.279 | 1.119 | [0.58,2.159]  | 0.736 | 0.920 | [0.458,1.848] | 0.815 | 0.549 |
| rs1464890  | ZC3HC1   | T | 0.483 | 0.958 | [0.755,1.217] | 0.728 | 0.906 | [0.585,1.403] | 0.659 | 0.946 | [0.592,1.511] | 0.815 | 0.870 |
| rs1189466  | ABCC4    | A | 0.071 | 0.862 | [0.543,1.367] | 0.528 | 0.957 | [0.42,2.183]  | 0.917 | 1.111 | [0.456,2.706] | 0.817 | 0.819 |
| rs4926     | SERPING1 | A | 0.232 | 1.168 | [0.882,1.547] | 0.279 | 1.094 | [0.65,1.842]  | 0.736 | 0.937 | [0.538,1.631] | 0.817 | 0.547 |
| rs12009    | HSPA5    | C | 0.472 | 1.054 | [0.84,1.322]  | 0.652 | 1.000 | [0.663,1.51]  | 0.999 | 0.949 | [0.61,1.476]  | 0.817 | 0.901 |
| rs1800796  | IL6      | C | 0.095 | 0.795 | [0.533,1.186] | 0.261 | 0.873 | [0.415,1.839] | 0.721 | 1.098 | [0.494,2.441] | 0.818 | 0.520 |
| rs1024323  | GRK4     | A | 0.420 | 0.947 | [0.745,1.204] | 0.658 | 1.001 | [0.649,1.542] | 0.998 | 1.056 | [0.663,1.683] | 0.818 | 0.905 |
| rs2854184  | GH1      | T | 0.368 | 0.928 | [0.721,1.194] | 0.559 | 0.982 | [0.625,1.542] | 0.937 | 1.059 | [0.651,1.721] | 0.818 | 0.843 |
| rs8645     | SUMO3    | C | 0.183 | 0.823 | [0.595,1.139] | 0.240 | 0.763 | [0.421,1.385] | 0.374 | 0.927 | [0.487,1.765] | 0.818 | 0.378 |
| rs2272797  | FMO6     | A | 0.162 | 1.206 | [0.897,1.621] | 0.214 | 1.287 | [0.768,2.157] | 0.339 | 1.067 | [0.614,1.853] | 0.819 | 0.345 |
| rs2725349  | WRN      | C | 0.335 | 1.009 | [0.786,1.294] | 0.946 | 1.067 | [0.682,1.67]  | 0.777 | 1.058 | [0.654,1.711] | 0.819 | 0.960 |
| rs2707466  | WNT16    | G | 0.491 | 1.093 | [0.857,1.394] | 0.472 | 1.035 | [0.668,1.603] | 0.878 | 0.947 | [0.592,1.514] | 0.819 | 0.771 |
| rs8016621  | SALL2    | A | 0.039 | 1.814 | [0.971,3.389] | 0.062 | 1.602 | [0.606,4.236] | 0.342 | 0.884 | [0.306,2.548] | 0.819 | 0.143 |
| rs3783408  | MAP4K5   | A | 0.228 | 0.849 | [0.639,1.129] | 0.260 | 0.794 | [0.464,1.36]  | 0.401 | 0.935 | [0.526,1.661] | 0.819 | 0.416 |
| rs10473282 | GHR      | A | 0.332 | 0.855 | [0.664,1.101] | 0.225 | 0.905 | [0.574,1.428] | 0.669 | 1.059 | [0.648,1.729] | 0.819 | 0.463 |
| rs2276235  | ABCG1    | A | 0.404 | 1.008 | [0.791,1.285] | 0.950 | 0.955 | [0.618,1.475] | 0.834 | 0.947 | [0.594,1.511] | 0.820 | 0.974 |
| rs16975750 | LIPE     | G | 0.037 | 1.021 | [0.502,2.077] | 0.954 | 0.878 | [0.268,2.878] | 0.830 | 0.860 | [0.235,3.152] | 0.820 | 0.974 |
| rs7483     | GSTM3    | A | 0.272 | 1.076 | [0.828,1.399] | 0.582 | 1.014 | [0.622,1.652] | 0.957 | 0.942 | [0.559,1.586] | 0.821 | 0.859 |
| rs235768   | BMP2     | A | 0.325 | 1.250 | [0.96,1.628]  | 0.097 | 1.326 | [0.821,2.143] | 0.249 | 1.061 | [0.635,1.772] | 0.822 | 0.165 |
| rs1800566  | NQO1     | T | 0.205 | 1.126 | [0.851,1.49]  | 0.405 | 1.058 | [0.635,1.763] | 0.827 | 0.940 | [0.545,1.619] | 0.823 | 0.704 |
| rs5742667  | IGF1     | T | 0.280 | 0.803 | [0.612,1.053] | 0.113 | 0.852 | [0.524,1.386] | 0.520 | 1.062 | [0.628,1.794] | 0.823 | 0.258 |
| rs316133   | GSTA4    | C | 0.432 | 1.235 | [0.972,1.569] | 0.084 | 1.172 | [0.763,1.8]   | 0.469 | 0.949 | [0.598,1.505] | 0.824 | 0.200 |
| rs673197   | GSTA4    | A | 0.432 | 1.235 | [0.972,1.569] | 0.084 | 1.172 | [0.763,1.8]   | 0.469 | 0.949 | [0.598,1.505] | 0.824 | 0.200 |
| rs2269829  | PON1     | G | 0.361 | 0.906 | [0.711,1.155] | 0.426 | 0.956 | [0.616,1.482] | 0.840 | 1.055 | [0.659,1.688] | 0.824 | 0.725 |
| rs169097   | CXCL12   | A | 0.025 | 0.975 | [0.409,2.322] | 0.954 | 1.141 | [0.335,3.887] | 0.833 | 1.170 | [0.292,4.689] | 0.824 | 0.974 |
| rs1800287  | FANCA    | C | 0.473 | 1.362 | [1.077,1.723] | 0.010 | 1.293 | [0.84,1.991]  | 0.244 | 0.949 | [0.598,1.505] | 0.824 | 0.026 |

|            |          |   |       |       |               |       |       |               |       |       |               |       |       |
|------------|----------|---|-------|-------|---------------|-------|-------|---------------|-------|-------|---------------|-------|-------|
| rs1492078  | AGTR1    | A | 0.444 | 0.806 | [0.625,1.04]  | 0.097 | 0.852 | [0.537,1.354] | 0.498 | 1.058 | [0.644,1.739] | 0.825 | 0.227 |
| rs2980374  | CYP3A7   | T | 0.038 | 0.893 | [0.441,1.81]  | 0.755 | 0.776 | [0.252,2.394] | 0.659 | 0.869 | [0.249,3.027] | 0.825 | 0.878 |
| rs3741378  | SIPA1    | A | 0.159 | 0.938 | [0.672,1.31]  | 0.707 | 0.871 | [0.472,1.609] | 0.660 | 0.929 | [0.481,1.796] | 0.827 | 0.862 |
| rs2227538  | IL8      | T | 0.038 | 0.760 | [0.353,1.637] | 0.484 | 0.877 | [0.283,2.723] | 0.821 | 1.154 | [0.319,4.18]  | 0.827 | 0.775 |
| rs10380    | MTRR     | T | 0.126 | 1.022 | [0.699,1.494] | 0.911 | 1.106 | [0.572,2.139] | 0.764 | 1.083 | [0.531,2.208] | 0.827 | 0.954 |
| rs2282140  | IGF2R    | T | 0.133 | 0.835 | [0.581,1.2]   | 0.330 | 0.770 | [0.393,1.511] | 0.448 | 0.923 | [0.447,1.905] | 0.828 | 0.506 |
| rs7796976  | AHR      | A | 0.206 | 1.004 | [0.742,1.358] | 0.980 | 0.941 | [0.547,1.62]  | 0.827 | 0.937 | [0.523,1.68]  | 0.828 | 0.975 |
| rs11568943 | EGF      | A | 0.098 | 0.986 | [0.653,1.488] | 0.945 | 1.072 | [0.536,2.144] | 0.845 | 1.087 | [0.51,2.318]  | 0.828 | 0.976 |
| rs2227932  | ATR      | C | 0.086 | 0.869 | [0.566,1.332] | 0.518 | 0.790 | [0.352,1.77]  | 0.566 | 0.909 | [0.382,2.161] | 0.829 | 0.717 |
| rs367836   | GSTA4    | C | 0.428 | 1.264 | [0.995,1.607] | 0.055 | 1.202 | [0.782,1.847] | 0.403 | 0.950 | [0.599,1.509] | 0.829 | 0.135 |
| rs971074   | ADH7     | A | 0.121 | 0.889 | [0.616,1.283] | 0.529 | 0.961 | [0.497,1.855] | 0.905 | 1.081 | [0.532,2.196] | 0.830 | 0.820 |
| rs1888202  | ALDH1A1  | G | 0.442 | 0.936 | [0.738,1.188] | 0.587 | 0.890 | [0.575,1.375] | 0.598 | 0.950 | [0.596,1.515] | 0.830 | 0.778 |
| rs5744751  | POLE     | T | 0.098 | 0.826 | [0.557,1.225] | 0.342 | 0.754 | [0.343,1.656] | 0.481 | 0.912 | [0.394,2.114] | 0.830 | 0.531 |
| rs1407309  | TNFSF8   | G | 0.480 | 1.026 | [0.808,1.302] | 0.834 | 1.079 | [0.698,1.667] | 0.731 | 1.052 | [0.66,1.676]  | 0.831 | 0.930 |
| rs903881   | ABCC1    | T | 0.192 | 1.474 | [1.097,1.98]  | 0.010 | 1.386 | [0.814,2.36]  | 0.230 | 0.940 | [0.534,1.657] | 0.831 | 0.026 |
| rs497763   | ANKRD49  | A | 0.436 | 0.973 | [0.772,1.227] | 0.817 | 1.022 | [0.668,1.566] | 0.919 | 1.051 | [0.666,1.658] | 0.831 | 0.965 |
| rs3817405  | PLXDC2   | C | 0.366 | 1.028 | [0.808,1.307] | 0.824 | 0.978 | [0.633,1.51]  | 0.918 | 0.951 | [0.597,1.516] | 0.834 | 0.967 |
| rs4980999  | CAMKK2   | A | 0.164 | 0.908 | [0.661,1.246] | 0.548 | 0.968 | [0.556,1.685] | 0.907 | 1.066 | [0.584,1.948] | 0.835 | 0.834 |
| rs1801394  | FASTKD3  | G | 0.496 | 0.927 | [0.731,1.176] | 0.533 | 0.882 | [0.569,1.368] | 0.576 | 0.951 | [0.595,1.521] | 0.835 | 0.735 |
| rs1043615  | DNAJB9   | A | 0.461 | 1.055 | [0.834,1.336] | 0.656 | 1.006 | [0.662,1.53]  | 0.977 | 0.954 | [0.608,1.496] | 0.836 | 0.905 |
| rs1135148  | BNIP2    | C | 0.327 | 1.057 | [0.826,1.354] | 0.660 | 1.114 | [0.701,1.769] | 0.649 | 1.054 | [0.643,1.726] | 0.836 | 0.838 |
| rs1751034  | ABCC4    | C | 0.214 | 1.031 | [0.763,1.393] | 0.842 | 0.969 | [0.562,1.673] | 0.911 | 0.940 | [0.523,1.69]  | 0.837 | 0.971 |
| rs2140516  | SLC13A1  | C | 0.313 | 1.174 | [0.915,1.505] | 0.207 | 1.115 | [0.706,1.76]  | 0.641 | 0.950 | [0.583,1.549] | 0.837 | 0.432 |
| rs1801278  | IRS1     | A | 0.057 | 1.205 | [0.744,1.953] | 0.449 | 1.096 | [0.468,2.569] | 0.832 | 0.910 | [0.369,2.245] | 0.837 | 0.748 |
| rs246241   | ABCC1    | T | 0.138 | 1.346 | [0.969,1.868] | 0.076 | 1.263 | [0.716,2.227] | 0.420 | 0.938 | [0.511,1.722] | 0.837 | 0.182 |
| rs4648276  | PTGS2    | C | 0.134 | 1.050 | [0.743,1.484] | 0.780 | 1.125 | [0.612,2.07]  | 0.704 | 1.071 | [0.554,2.071] | 0.838 | 0.906 |
| rs2267130  | CHEK2    | C | 0.393 | 0.932 | [0.734,1.184] | 0.566 | 0.888 | [0.574,1.373] | 0.594 | 0.952 | [0.597,1.52]  | 0.838 | 0.763 |
| rs1270764  | TSSK4    | C | 0.025 | 0.517 | [0.197,1.352] | 0.178 | 0.609 | [0.154,2.4]   | 0.478 | 1.178 | [0.243,5.712] | 0.839 | 0.347 |
| rs2363641  | POMT2    | G | 0.326 | 0.978 | [0.765,1.251] | 0.862 | 0.931 | [0.593,1.461] | 0.755 | 0.951 | [0.587,1.542] | 0.839 | 0.944 |
| rs2074086  | ABCC1    | C | 0.379 | 1.011 | [0.782,1.309] | 0.931 | 1.065 | [0.67,1.693]  | 0.790 | 1.053 | [0.64,1.733]  | 0.839 | 0.964 |
| rs4149272  | ABCA1    | A | 0.448 | 1.117 | [0.873,1.431] | 0.379 | 1.063 | [0.677,1.669] | 0.791 | 0.951 | [0.586,1.544] | 0.840 | 0.672 |
| rs11688    | JUN      | A | 0.073 | 0.979 | [0.608,1.577] | 0.931 | 1.072 | [0.478,2.403] | 0.866 | 1.095 | [0.455,2.637] | 0.840 | 0.980 |
| rs2320165  | CART     | C | 0.428 | 0.970 | [0.765,1.23]  | 0.802 | 1.017 | [0.663,1.56]  | 0.938 | 1.048 | [0.662,1.66]  | 0.840 | 0.963 |
| rs2231924  | FLJ10213 | T | 0.462 | 1.072 | [0.843,1.365] | 0.569 | 1.023 | [0.664,1.576] | 0.918 | 0.954 | [0.599,1.518] | 0.842 | 0.850 |
| rs2608555  | GAN      | T | 0.241 | 1.037 | [0.788,1.366] | 0.795 | 0.982 | [0.593,1.624] | 0.943 | 0.946 | [0.551,1.625] | 0.842 | 0.961 |
| rs4149180  | SLC22A8  | A | 0.116 | 1.174 | [0.718,1.918] | 0.523 | 1.075 | [0.494,2.341] | 0.855 | 0.916 | [0.388,2.164] | 0.842 | 0.812 |
| rs759845   | ADAM23   | C | 0.387 | 0.981 | [0.77,1.249]  | 0.875 | 1.028 | [0.666,1.588] | 0.900 | 1.048 | [0.658,1.67]  | 0.842 | 0.977 |
| rs4149117  | SLCO1B3  | T | 0.213 | 1.470 | [1.089,1.984] | 0.012 | 1.554 | [0.934,2.585] | 0.090 | 1.057 | [0.612,1.827] | 0.842 | 0.018 |
| rs2250889  | MMP9     | G | 0.087 | 0.873 | [0.565,1.348] | 0.539 | 0.951 | [0.432,2.094] | 0.901 | 1.090 | [0.465,2.553] | 0.842 | 0.827 |
| rs2253635  | CYP2C9   | G | 0.384 | 1.079 | [0.847,1.376] | 0.537 | 1.132 | [0.727,1.763] | 0.582 | 1.049 | [0.653,1.686] | 0.843 | 0.740 |
| rs2277119  | CYP39A1  | A | 0.233 | 0.982 | [0.741,1.3]   | 0.897 | 1.036 | [0.631,1.699] | 0.889 | 1.055 | [0.619,1.798] | 0.843 | 0.979 |

|            |          |   |       |       |               |       |       |               |       |       |               |       |       |
|------------|----------|---|-------|-------|---------------|-------|-------|---------------|-------|-------|---------------|-------|-------|
| rs2860840  | CYP2C18  | T | 0.300 | 0.970 | [0.749,1.258] | 0.821 | 1.022 | [0.635,1.643] | 0.930 | 1.053 | [0.633,1.751] | 0.843 | 0.968 |
| rs2069762  | IL2      | G | 0.269 | 0.857 | [0.653,1.125] | 0.267 | 0.905 | [0.549,1.492] | 0.696 | 1.056 | [0.617,1.807] | 0.843 | 0.524 |
| rs611251   | PPP1R15A | G | 0.187 | 0.963 | [0.693,1.34]  | 0.824 | 1.026 | [0.574,1.834] | 0.930 | 1.065 | [0.569,1.996] | 0.843 | 0.969 |
| rs1048013  | CYP20A1  | T | 0.497 | 0.951 | [0.752,1.202] | 0.675 | 0.908 | [0.592,1.392] | 0.659 | 0.955 | [0.604,1.509] | 0.844 | 0.850 |
| rs2681417  | CD86     | G | 0.117 | 0.966 | [0.641,1.456] | 0.870 | 0.897 | [0.453,1.776] | 0.755 | 0.928 | [0.44,1.957]  | 0.844 | 0.945 |
| rs2020895  | CASP9    | T | 0.438 | 1.211 | [0.957,1.534] | 0.111 | 1.156 | [0.749,1.785] | 0.512 | 0.955 | [0.599,1.521] | 0.845 | 0.254 |
| rs585890   | SRD5A2   | T | 0.465 | 0.941 | [0.742,1.195] | 0.620 | 0.986 | [0.64,1.518]  | 0.949 | 1.047 | [0.659,1.665] | 0.845 | 0.884 |
| rs5988     | F13A1    | C | 0.163 | 1.101 | [0.817,1.485] | 0.527 | 1.165 | [0.686,1.977] | 0.572 | 1.058 | [0.6,1.864]   | 0.846 | 0.731 |
| rs7496     | GSTA4    | A | 0.155 | 1.052 | [0.782,1.415] | 0.736 | 0.996 | [0.59,1.679]  | 0.987 | 0.946 | [0.54,1.658]  | 0.846 | 0.943 |
| rs2241279  | FGF6     | C | 0.419 | 0.866 | [0.679,1.105] | 0.246 | 0.907 | [0.588,1.398] | 0.657 | 1.047 | [0.657,1.669] | 0.846 | 0.490 |
| rs2287395  | GSTZ1    | G | 0.297 | 0.925 | [0.718,1.193] | 0.550 | 0.880 | [0.55,1.41]   | 0.596 | 0.951 | [0.574,1.577] | 0.847 | 0.754 |
| rs3770     | ABCC4    | A | 0.413 | 1.034 | [0.816,1.31]  | 0.780 | 0.989 | [0.651,1.504] | 0.960 | 0.957 | [0.61,1.501]  | 0.847 | 0.958 |
| rs207878   | XRCC5    | G | 0.417 | 1.031 | [0.811,1.311] | 0.803 | 0.985 | [0.639,1.518] | 0.946 | 0.955 | [0.601,1.518] | 0.847 | 0.964 |
| rs3784932  | CHST5    | C | 0.185 | 1.191 | [0.887,1.598] | 0.245 | 1.126 | [0.66,1.92]   | 0.663 | 0.946 | [0.537,1.667] | 0.847 | 0.493 |
| rs8191613  | NEIL2    | A | 0.028 | 0.967 | [0.477,1.961] | 0.925 | 1.096 | [0.345,3.477] | 0.877 | 1.133 | [0.318,4.037] | 0.847 | 0.981 |
| rs3130618  | BAT4     | A | 0.224 | 1.023 | [0.772,1.355] | 0.876 | 1.078 | [0.656,1.771] | 0.767 | 1.054 | [0.617,1.801] | 0.847 | 0.951 |
| rs2069849  | IL6      | T | 0.045 | 1.330 | [0.745,2.373] | 0.334 | 1.201 | [0.457,3.154] | 0.710 | 0.903 | [0.319,2.556] | 0.847 | 0.613 |
| rs10794486 | IGF1R    | G | 0.368 | 1.100 | [0.854,1.417] | 0.460 | 1.048 | [0.663,1.658] | 0.840 | 0.953 | [0.583,1.558] | 0.848 | 0.758 |
| rs1042482  | DPYD     | A | 0.081 | 1.113 | [0.724,1.711] | 0.625 | 1.024 | [0.461,2.277] | 0.953 | 0.920 | [0.393,2.154] | 0.848 | 0.887 |
| rs305968   | CYP2F1   | A | 0.359 | 0.978 | [0.758,1.26]  | 0.861 | 1.025 | [0.652,1.612] | 0.914 | 1.049 | [0.645,1.707] | 0.848 | 0.976 |
| rs17273563 | BLM      | A | 0.176 | 0.978 | [0.713,1.342] | 0.892 | 0.921 | [0.516,1.643] | 0.780 | 0.941 | [0.506,1.75]  | 0.848 | 0.957 |
| rs1048201  | FGF2     | T | 0.164 | 0.872 | [0.634,1.201] | 0.402 | 0.927 | [0.522,1.647] | 0.796 | 1.062 | [0.572,1.975] | 0.848 | 0.696 |
| rs833061   | VEGFA    | C | 0.468 | 1.080 | [0.856,1.363] | 0.514 | 1.129 | [0.743,1.714] | 0.570 | 1.045 | [0.667,1.636] | 0.848 | 0.720 |
| rs4680     | COMT     | A | 0.452 | 1.085 | [0.847,1.389] | 0.519 | 1.034 | [0.654,1.635] | 0.886 | 0.953 | [0.584,1.556] | 0.848 | 0.811 |
| rs3771342  | UGT1A1   | A | 0.147 | 0.965 | [0.686,1.357] | 0.837 | 0.904 | [0.49,1.67]   | 0.748 | 0.937 | [0.483,1.818] | 0.848 | 0.937 |
| rs6457816  | PPARD    | C | 0.164 | 0.892 | [0.616,1.291] | 0.545 | 0.831 | [0.419,1.646] | 0.595 | 0.931 | [0.448,1.937] | 0.849 | 0.751 |
| rs1056836  | CYP1B1   | G | 0.483 | 1.068 | [0.836,1.364] | 0.599 | 1.020 | [0.655,1.589] | 0.929 | 0.955 | [0.594,1.537] | 0.851 | 0.871 |
| rs1063743  | TACC3    | A | 0.239 | 0.877 | [0.665,1.158] | 0.355 | 0.924 | [0.558,1.53]  | 0.759 | 1.053 | [0.612,1.812] | 0.852 | 0.641 |
| rs2671272  | EPHX1    | T | 0.267 | 0.969 | [0.737,1.274] | 0.822 | 0.922 | [0.564,1.507] | 0.745 | 0.951 | [0.56,1.616]  | 0.853 | 0.933 |
| rs2684773  | IGF1R    | G | 0.180 | 1.139 | [0.825,1.573] | 0.428 | 1.076 | [0.607,1.905] | 0.803 | 0.944 | [0.511,1.745] | 0.854 | 0.723 |
| rs1052576  | CASP9    | A | 0.444 | 1.238 | [0.978,1.567] | 0.077 | 1.293 | [0.841,1.986] | 0.242 | 1.044 | [0.658,1.657] | 0.854 | 0.134 |
| rs4148380  | ABCC1    | A | 0.053 | 1.198 | [0.73,1.966]  | 0.475 | 1.090 | [0.422,2.815] | 0.858 | 0.910 | [0.333,2.484] | 0.854 | 0.772 |
| rs215060   | ABCC1    | G | 0.117 | 1.136 | [0.799,1.615] | 0.478 | 1.063 | [0.547,2.067] | 0.857 | 0.936 | [0.462,1.897] | 0.854 | 0.775 |
| rs1611753  | SPRR1A   | C | 0.455 | 0.947 | [0.748,1.2]   | 0.653 | 0.908 | [0.593,1.388] | 0.655 | 0.958 | [0.607,1.513] | 0.855 | 0.838 |
| rs7921     | CD79B    | T | 0.252 | 1.033 | [0.793,1.347] | 0.808 | 0.986 | [0.619,1.572] | 0.953 | 0.954 | [0.578,1.576] | 0.855 | 0.967 |
| rs2072671  | CDA      | C | 0.284 | 1.009 | [0.777,1.311] | 0.946 | 0.960 | [0.584,1.579] | 0.873 | 0.952 | [0.56,1.617]  | 0.855 | 0.983 |
| rs2241228  | GPRC5A   | A | 0.450 | 1.043 | [0.818,1.33]  | 0.734 | 0.998 | [0.643,1.55]  | 0.993 | 0.957 | [0.597,1.534] | 0.855 | 0.942 |
| rs2854455  | EPHX1    | C | 0.266 | 0.919 | [0.696,1.215] | 0.554 | 0.966 | [0.594,1.569] | 0.887 | 1.050 | [0.621,1.777] | 0.855 | 0.838 |
| rs2274736  | PTPN21   | C | 0.367 | 0.901 | [0.701,1.157] | 0.413 | 0.943 | [0.596,1.493] | 0.803 | 1.047 | [0.639,1.715] | 0.855 | 0.708 |
| rs246214   | ABCC1    | T | 0.142 | 0.993 | [0.709,1.391] | 0.968 | 1.054 | [0.577,1.927] | 0.863 | 1.062 | [0.557,2.024] | 0.855 | 0.983 |
| rs6021275  | NFATC2   | G | 0.417 | 0.850 | [0.671,1.077] | 0.178 | 0.887 | [0.583,1.349] | 0.574 | 1.043 | [0.663,1.639] | 0.856 | 0.376 |

|            |         |   |       |       |               |       |       |               |       |       |               |       |       |
|------------|---------|---|-------|-------|---------------|-------|-------|---------------|-------|-------|---------------|-------|-------|
| rs2953983  | POLB    | C | 0.176 | 0.898 | [0.617,1.309] | 0.577 | 0.842 | [0.442,1.606] | 0.602 | 0.937 | [0.465,1.89]  | 0.856 | 0.773 |
| rs3814058  | NR1I2   | C | 0.240 | 1.043 | [0.775,1.405] | 0.781 | 0.990 | [0.59,1.662]  | 0.971 | 0.950 | [0.541,1.665] | 0.857 | 0.960 |
| rs13027171 | MERTK   | A | 0.253 | 0.852 | [0.647,1.122] | 0.254 | 0.896 | [0.535,1.501] | 0.677 | 1.052 | [0.606,1.828] | 0.857 | 0.502 |
| rs730821   | SIRT1   | G | 0.232 | 1.305 | [0.994,1.713] | 0.055 | 1.243 | [0.756,2.045] | 0.391 | 0.953 | [0.561,1.619] | 0.858 | 0.134 |
| rs2032349  | ADH4    | T | 0.033 | 1.528 | [0.838,2.787] | 0.166 | 1.379 | [0.471,4.035] | 0.557 | 0.902 | [0.292,2.792] | 0.858 | 0.363 |
| rs543304   | BRCA2   | C | 0.179 | 1.280 | [0.957,1.714] | 0.097 | 1.217 | [0.721,2.055] | 0.463 | 0.950 | [0.543,1.663] | 0.859 | 0.223 |
| rs7775     | FRZB    | G | 0.114 | 0.848 | [0.567,1.268] | 0.422 | 0.791 | [0.389,1.608] | 0.517 | 0.932 | [0.432,2.015] | 0.859 | 0.622 |
| rs1200314  | CYP2C9  | C | 0.047 | 1.121 | [0.652,1.925] | 0.680 | 1.022 | [0.398,2.626] | 0.963 | 0.912 | [0.33,2.522]  | 0.859 | 0.918 |
| rs1341162  | CYP2C8  | A | 0.244 | 1.167 | [0.883,1.543] | 0.279 | 1.113 | [0.68,1.822]  | 0.671 | 0.954 | [0.561,1.621] | 0.861 | 0.536 |
| rs17012064 | PTPN13  | C | 0.012 | 0.509 | [0.11,2.349]  | 0.387 | 0.638 | [0.074,5.5]   | 0.683 | 1.254 | [0.1,15.784]  | 0.861 | 0.650 |
| rs4148949  | CHST3   | T | 0.376 | 0.838 | [0.654,1.073] | 0.162 | 0.802 | [0.507,1.269] | 0.346 | 0.957 | [0.586,1.564] | 0.861 | 0.282 |
| rs731236   | VDR     | C | 0.362 | 0.887 | [0.687,1.144] | 0.356 | 0.849 | [0.54,1.336]  | 0.480 | 0.958 | [0.587,1.562] | 0.862 | 0.549 |
| rs3093105  | CYP4F2  | G | 0.189 | 1.124 | [0.837,1.509] | 0.438 | 1.069 | [0.633,1.807] | 0.803 | 0.951 | [0.542,1.669] | 0.862 | 0.733 |
| rs4149963  | EXO1    | T | 0.085 | 0.900 | [0.594,1.365] | 0.620 | 0.968 | [0.453,2.069] | 0.932 | 1.075 | [0.475,2.434] | 0.862 | 0.884 |
| rs9935059  | EEF2K   | G | 0.124 | 1.082 | [0.747,1.569] | 0.677 | 1.151 | [0.606,2.184] | 0.668 | 1.063 | [0.531,2.129] | 0.862 | 0.855 |
| rs6644     | ADSSL1  | T | 0.457 | 0.796 | [0.619,1.023] | 0.074 | 0.762 | [0.484,1.2]   | 0.241 | 0.958 | [0.589,1.559] | 0.863 | 0.132 |
| rs6220     | IGF1    | G | 0.304 | 0.830 | [0.638,1.081] | 0.168 | 0.869 | [0.541,1.396] | 0.561 | 1.046 | [0.627,1.744] | 0.863 | 0.357 |
| rs9808232  | ROCK2   | T | 0.492 | 0.905 | [0.71,1.153]  | 0.418 | 0.943 | [0.608,1.462] | 0.793 | 1.042 | [0.65,1.671]  | 0.864 | 0.712 |
| rs2306134  | PPP4R1  | T | 0.184 | 0.962 | [0.709,1.306] | 0.804 | 1.012 | [0.587,1.746] | 0.964 | 1.052 | [0.586,1.889] | 0.864 | 0.967 |
| rs4983543  | ADSSL1  | T | 0.457 | 0.793 | [0.617,1.019] | 0.069 | 0.760 | [0.483,1.196] | 0.235 | 0.958 | [0.589,1.559] | 0.864 | 0.123 |
| rs2389603  | ABCB11  | T | 0.067 | 1.306 | [0.795,2.146] | 0.292 | 1.204 | [0.504,2.874] | 0.676 | 0.922 | [0.361,2.351] | 0.864 | 0.554 |
| rs7736656  | UBLCP1  | A | 0.177 | 1.096 | [0.81,1.483]  | 0.553 | 1.152 | [0.674,1.971] | 0.605 | 1.051 | [0.591,1.871] | 0.865 | 0.762 |
| rs1805059  | SLC7A7  | G | 0.417 | 1.019 | [0.8,1.298]   | 0.879 | 1.060 | [0.693,1.623] | 0.788 | 1.041 | [0.658,1.646] | 0.865 | 0.958 |
| rs569143   | MRE11A  | G | 0.450 | 1.025 | [0.815,1.29]  | 0.830 | 1.065 | [0.705,1.61]  | 0.763 | 1.039 | [0.668,1.617] | 0.865 | 0.941 |
| rs2392221  | VCAM1   | T | 0.146 | 0.956 | [0.681,1.341] | 0.794 | 1.011 | [0.554,1.844] | 0.972 | 1.058 | [0.553,2.021] | 0.866 | 0.964 |
| rs16938893 | GDAP1   | G | 0.301 | 1.168 | [0.904,1.507] | 0.235 | 1.119 | [0.705,1.777] | 0.634 | 0.958 | [0.584,1.572] | 0.866 | 0.471 |
| rs2293616  | SLC15A2 | T | 0.442 | 0.973 | [0.77,1.229]  | 0.816 | 1.011 | [0.664,1.539] | 0.959 | 1.040 | [0.662,1.634] | 0.866 | 0.970 |
| rs1673026  | POLD1   | T | 0.104 | 1.163 | [0.785,1.723] | 0.453 | 1.235 | [0.649,2.348] | 0.520 | 1.062 | [0.527,2.141] | 0.866 | 0.653 |
| rs1024611  | CCL2    | C | 0.281 | 1.193 | [0.93,1.532]  | 0.165 | 1.244 | [0.791,1.957] | 0.345 | 1.042 | [0.643,1.691] | 0.867 | 0.289 |
| rs2472304  | CYP1A2  | G | 0.488 | 1.047 | [0.82,1.338]  | 0.713 | 1.091 | [0.698,1.705] | 0.703 | 1.042 | [0.646,1.681] | 0.867 | 0.884 |
| rs7081     | SLC5A6  | G | 0.141 | 1.017 | [0.673,1.536] | 0.938 | 1.084 | [0.542,2.169] | 0.819 | 1.067 | [0.499,2.281] | 0.868 | 0.973 |
| rs1805313  | ALAD    | C | 0.386 | 0.990 | [0.775,1.265] | 0.936 | 1.030 | [0.665,1.597] | 0.894 | 1.041 | [0.649,1.668] | 0.869 | 0.986 |
| rs2237582  | PON1    | G | 0.402 | 0.926 | [0.728,1.178] | 0.533 | 0.890 | [0.576,1.378] | 0.602 | 0.961 | [0.602,1.535] | 0.869 | 0.748 |
| rs3136820  | APEX1   | G | 0.464 | 0.915 | [0.723,1.158] | 0.459 | 0.950 | [0.628,1.436] | 0.807 | 1.038 | [0.664,1.622] | 0.869 | 0.752 |
| rs1136410  | PARP1   | C | 0.164 | 1.252 | [0.92,1.705]  | 0.153 | 1.315 | [0.759,2.28]  | 0.329 | 1.050 | [0.585,1.885] | 0.869 | 0.272 |
| rs5743611  | TLR1    | C | 0.081 | 0.882 | [0.569,1.367] | 0.574 | 0.950 | [0.414,2.179] | 0.903 | 1.077 | [0.445,2.609] | 0.870 | 0.853 |
| rs10429965 | NEK2    | C | 0.139 | 0.932 | [0.673,1.29]  | 0.670 | 0.980 | [0.557,1.726] | 0.945 | 1.052 | [0.572,1.937] | 0.870 | 0.913 |
| rs3828942  | LEP     | A | 0.404 | 1.000 | [0.785,1.275] | 0.998 | 0.961 | [0.613,1.506] | 0.862 | 0.961 | [0.594,1.553] | 0.870 | 0.985 |
| rs11572073 | CYP2C8  | T | 0.021 | 1.400 | [0.517,3.789] | 0.508 | 1.220 | [0.274,5.432] | 0.794 | 0.871 | [0.167,4.543] | 0.870 | 0.794 |
| rs2421047  | IL12B   | A | 0.246 | 0.948 | [0.724,1.241] | 0.698 | 0.907 | [0.556,1.48]  | 0.696 | 0.957 | [0.564,1.622] | 0.870 | 0.874 |
| rs1805411  | PARP1   | A | 0.174 | 1.146 | [0.844,1.557] | 0.383 | 1.204 | [0.693,2.09]  | 0.510 | 1.050 | [0.584,1.89]  | 0.870 | 0.595 |

|           |          |   |       |       |               |       |       |               |       |       |               |       |       |
|-----------|----------|---|-------|-------|---------------|-------|-------|---------------|-------|-------|---------------|-------|-------|
| rs17561   | IL1A     | T | 0.275 | 1.040 | [0.803,1.346] | 0.767 | 0.997 | [0.623,1.596] | 0.990 | 0.959 | [0.579,1.588] | 0.871 | 0.956 |
| rs442332  | RUNDC2A  | C | 0.107 | 0.984 | [0.663,1.461] | 0.937 | 1.045 | [0.536,2.04]  | 0.897 | 1.062 | [0.515,2.189] | 0.871 | 0.987 |
| rs35629   | ABCC1    | T | 0.176 | 1.186 | [0.839,1.677] | 0.335 | 1.122 | [0.605,2.082] | 0.716 | 0.946 | [0.485,1.845] | 0.871 | 0.611 |
| rs914959  | DPYD     | A | 0.320 | 0.867 | [0.679,1.108] | 0.254 | 0.833 | [0.522,1.329] | 0.442 | 0.960 | [0.583,1.58]  | 0.873 | 0.429 |
| rs1143671 | SLC15A2  | T | 0.441 | 0.976 | [0.773,1.233] | 0.840 | 1.013 | [0.665,1.541] | 0.953 | 1.037 | [0.66,1.63]   | 0.873 | 0.976 |
| rs1044141 | STK17A   | A | 0.193 | 0.819 | [0.605,1.11]  | 0.199 | 0.779 | [0.436,1.392] | 0.399 | 0.951 | [0.511,1.77]  | 0.874 | 0.345 |
| rs2582790 | HMGCS2   | T | 0.315 | 0.863 | [0.669,1.114] | 0.259 | 0.829 | [0.523,1.314] | 0.426 | 0.961 | [0.586,1.576] | 0.874 | 0.428 |
| rs3851294 | RIPK5    | A | 0.076 | 1.128 | [0.728,1.749] | 0.589 | 1.050 | [0.457,2.416] | 0.908 | 0.931 | [0.384,2.256] | 0.874 | 0.864 |
| rs1346044 | WRN      | C | 0.239 | 1.015 | [0.773,1.332] | 0.916 | 0.971 | [0.585,1.613] | 0.910 | 0.957 | [0.557,1.645] | 0.874 | 0.986 |
| rs3783613 | VCAM1    | C | 0.018 | 0.435 | [0.123,1.54]  | 0.197 | 0.359 | [0.044,2.961] | 0.341 | 0.826 | [0.077,8.881] | 0.874 | 0.302 |
| rs7515157 | FMO2     | T | 0.330 | 0.916 | [0.709,1.185] | 0.505 | 0.953 | [0.605,1.502] | 0.837 | 1.040 | [0.638,1.696] | 0.875 | 0.796 |
| rs9282626 | CAT      | C | 0.046 | 1.034 | [0.597,1.791] | 0.904 | 1.123 | [0.436,2.89]  | 0.811 | 1.085 | [0.391,3.015] | 0.875 | 0.968 |
| rs2185379 | PRDM1    | A | 0.039 | 0.997 | [0.522,1.902] | 0.992 | 1.095 | [0.376,3.188] | 0.868 | 1.098 | [0.339,3.56]  | 0.876 | 0.986 |
| rs7987433 | SLC10A2  | C | 0.146 | 1.227 | [0.883,1.705] | 0.223 | 1.288 | [0.732,2.265] | 0.380 | 1.050 | [0.571,1.93]  | 0.876 | 0.372 |
| rs308394  | FGF2     | C | 0.031 | 0.983 | [0.472,2.044] | 0.963 | 0.883 | [0.258,3.026] | 0.843 | 0.899 | [0.234,3.449] | 0.876 | 0.980 |
| rs5030737 | MBL2     | T | 0.065 | 1.080 | [0.679,1.718] | 0.744 | 1.005 | [0.423,2.383] | 0.992 | 0.930 | [0.369,2.341] | 0.877 | 0.947 |
| rs1051298 | SLC19A1  | T | 0.446 | 0.903 | [0.711,1.147] | 0.401 | 0.936 | [0.612,1.43]  | 0.759 | 1.037 | [0.657,1.636] | 0.877 | 0.691 |
| rs2066870 | FGG      | C | 0.016 | 1.262 | [0.46,3.464]  | 0.651 | 1.422 | [0.377,5.363] | 0.603 | 1.127 | [0.247,5.132] | 0.877 | 0.817 |
| rs617219  | BHMT     | C | 0.352 | 0.971 | [0.761,1.237] | 0.810 | 1.007 | [0.65,1.56]   | 0.974 | 1.038 | [0.649,1.66]  | 0.877 | 0.969 |
| rs2288378 | IGF1     | A | 0.231 | 0.910 | [0.686,1.208] | 0.514 | 0.871 | [0.519,1.462] | 0.601 | 0.957 | [0.549,1.669] | 0.878 | 0.733 |
| rs1052637 | DDX18    | C | 0.394 | 1.005 | [0.786,1.283] | 0.971 | 1.043 | [0.67,1.623]  | 0.853 | 1.038 | [0.646,1.667] | 0.878 | 0.983 |
| rs2292305 | THBS1    | C | 0.186 | 1.257 | [0.92,1.718]  | 0.152 | 1.200 | [0.691,2.085] | 0.518 | 0.955 | [0.528,1.727] | 0.878 | 0.325 |
| rs289747  | NLRC5    | A | 0.395 | 0.948 | [0.742,1.211] | 0.669 | 0.913 | [0.584,1.427] | 0.690 | 0.963 | [0.596,1.556] | 0.878 | 0.861 |
| rs669674  | GSTA4    | T | 0.093 | 0.943 | [0.641,1.388] | 0.767 | 0.888 | [0.43,1.834]  | 0.748 | 0.941 | [0.433,2.046] | 0.878 | 0.919 |
| rs1799977 | MLH1     | G | 0.259 | 1.117 | [0.858,1.456] | 0.411 | 1.073 | [0.656,1.755] | 0.779 | 0.960 | [0.569,1.621] | 0.879 | 0.704 |
| rs854569  | PON1     | T | 0.319 | 0.970 | [0.745,1.264] | 0.823 | 0.933 | [0.581,1.498] | 0.773 | 0.961 | [0.578,1.599] | 0.879 | 0.943 |
| rs1413229 | DPYD     | A | 0.312 | 0.906 | [0.709,1.158] | 0.429 | 0.872 | [0.548,1.387] | 0.562 | 0.962 | [0.586,1.579] | 0.879 | 0.652 |
| rs10046   | CYP19A1  | T | 0.475 | 1.017 | [0.8,1.292]   | 0.892 | 0.981 | [0.639,1.506] | 0.931 | 0.965 | [0.609,1.529] | 0.880 | 0.985 |
| rs2489581 | PDSS1    | G | 0.444 | 1.125 | [0.884,1.432] | 0.339 | 1.085 | [0.703,1.675] | 0.712 | 0.965 | [0.605,1.538] | 0.880 | 0.615 |
| rs3808553 | FZD6     | G | 0.445 | 1.049 | [0.831,1.326] | 0.687 | 1.013 | [0.66,1.553]  | 0.953 | 0.965 | [0.61,1.526]  | 0.880 | 0.922 |
| rs588701  | MRE11A   | A | 0.328 | 1.134 | [0.884,1.454] | 0.323 | 1.092 | [0.687,1.736] | 0.710 | 0.963 | [0.588,1.577] | 0.881 | 0.598 |
| rs2033178 | IGF1     | T | 0.061 | 0.964 | [0.594,1.564] | 0.882 | 0.893 | [0.348,2.293] | 0.814 | 0.926 | [0.339,2.533] | 0.881 | 0.966 |
| rs4919682 | CYP17A1  | T | 0.266 | 1.132 | [0.877,1.461] | 0.343 | 1.090 | [0.684,1.737] | 0.718 | 0.963 | [0.587,1.581] | 0.881 | 0.623 |
| rs2020870 | FMO2     | G | 0.074 | 0.630 | [0.38,1.045]  | 0.073 | 0.677 | [0.284,1.616] | 0.380 | 1.076 | [0.413,2.799] | 0.881 | 0.159 |
| rs2295298 | NFATC4   | A | 0.494 | 1.041 | [0.82,1.321]  | 0.742 | 1.079 | [0.695,1.674] | 0.735 | 1.036 | [0.648,1.658] | 0.882 | 0.907 |
| rs410509  | EDEM1    | C | 0.048 | 1.313 | [0.769,2.242] | 0.318 | 1.414 | [0.574,3.488] | 0.452 | 1.077 | [0.406,2.859] | 0.882 | 0.505 |
| rs6919734 | PPARD    | A | 0.032 | 0.614 | [0.281,1.34]  | 0.221 | 0.545 | [0.126,2.346] | 0.415 | 0.887 | [0.183,4.292] | 0.882 | 0.374 |
| rs2159499 | STARD3NL | G | 0.451 | 0.924 | [0.728,1.174] | 0.519 | 0.892 | [0.578,1.377] | 0.607 | 0.965 | [0.606,1.538] | 0.882 | 0.741 |
| rs1157745 | PON1     | T | 0.396 | 0.905 | [0.712,1.151] | 0.417 | 0.874 | [0.564,1.352] | 0.545 | 0.965 | [0.604,1.542] | 0.882 | 0.635 |
| rs2426157 | PTPN1    | G | 0.269 | 1.116 | [0.859,1.45]  | 0.410 | 1.159 | [0.727,1.849] | 0.535 | 1.038 | [0.629,1.713] | 0.883 | 0.627 |
| rs7867504 | SLC28A3  | C | 0.384 | 1.207 | [0.939,1.551] | 0.143 | 1.251 | [0.801,1.953] | 0.325 | 1.037 | [0.642,1.673] | 0.883 | 0.252 |

|            |           |   |       |       |               |       |       |               |       |       |               |       |       |
|------------|-----------|---|-------|-------|---------------|-------|-------|---------------|-------|-------|---------------|-------|-------|
| rs1260326  | GCKR      | T | 0.344 | 0.924 | [0.708,1.207] | 0.564 | 0.888 | [0.542,1.457] | 0.639 | 0.961 | [0.566,1.632] | 0.883 | 0.783 |
| rs376618   | FGFR4     | G | 0.247 | 0.981 | [0.745,1.291] | 0.891 | 0.942 | [0.57,1.556]  | 0.816 | 0.961 | [0.56,1.646]  | 0.884 | 0.968 |
| rs596104   | PHGDH     | A | 0.421 | 0.938 | [0.737,1.194] | 0.605 | 0.906 | [0.587,1.399] | 0.656 | 0.966 | [0.606,1.539] | 0.884 | 0.815 |
| rs1271079  | MRE11A    | G | 0.257 | 1.175 | [0.902,1.531] | 0.231 | 1.131 | [0.693,1.845] | 0.623 | 0.962 | [0.572,1.618] | 0.884 | 0.465 |
| rs215095   | ABCC1     | C | 0.116 | 1.200 | [0.844,1.707] | 0.310 | 1.139 | [0.586,2.212] | 0.701 | 0.949 | [0.469,1.92]  | 0.884 | 0.580 |
| rs3091336  | IL3       | A | 0.065 | 0.962 | [0.54,1.714]  | 0.896 | 0.892 | [0.356,2.236] | 0.808 | 0.927 | [0.336,2.561] | 0.884 | 0.966 |
| rs1503185  | PTPRJ     | T | 0.170 | 0.858 | [0.621,1.184] | 0.350 | 0.898 | [0.505,1.599] | 0.716 | 1.048 | [0.561,1.957] | 0.884 | 0.626 |
| rs2239359  | FANCA     | T | 0.470 | 1.026 | [0.812,1.298] | 0.827 | 1.061 | [0.697,1.616] | 0.781 | 1.034 | [0.658,1.624] | 0.884 | 0.947 |
| rs7164902  | SLC12A6   | A | 0.256 | 1.137 | [0.861,1.501] | 0.366 | 1.093 | [0.666,1.793] | 0.725 | 0.961 | [0.565,1.636] | 0.884 | 0.648 |
| rs3211892  | CD36      | A | 0.059 | 1.069 | [0.611,1.87]  | 0.814 | 0.988 | [0.364,2.679] | 0.980 | 0.924 | [0.314,2.717] | 0.885 | 0.971 |
| rs909530   | FMO3      | T | 0.287 | 1.175 | [0.912,1.514] | 0.213 | 1.134 | [0.72,1.785]  | 0.588 | 0.965 | [0.593,1.569] | 0.885 | 0.432 |
| rs523349   | SRD5A2    | G | 0.287 | 1.008 | [0.782,1.301] | 0.949 | 1.046 | [0.656,1.668] | 0.850 | 1.037 | [0.629,1.711] | 0.886 | 0.981 |
| rs3136717  | POLB      | C | 0.215 | 0.916 | [0.655,1.282] | 0.608 | 0.960 | [0.534,1.725] | 0.890 | 1.048 | [0.555,1.975] | 0.886 | 0.875 |
| rs9350     | EXO1      | T | 0.179 | 0.751 | [0.544,1.036] | 0.081 | 0.785 | [0.443,1.393] | 0.408 | 1.046 | [0.563,1.944] | 0.887 | 0.181 |
| rs699947   | VEGFA     | A | 0.437 | 1.066 | [0.844,1.347] | 0.593 | 1.102 | [0.715,1.7]   | 0.659 | 1.034 | [0.651,1.644] | 0.887 | 0.809 |
| rs3918226  | NOS3      | T | 0.070 | 1.235 | [0.793,1.924] | 0.350 | 1.159 | [0.505,2.659] | 0.727 | 0.938 | [0.391,2.251] | 0.887 | 0.634 |
| rs11155472 | SIM1      | T | 0.489 | 1.006 | [0.799,1.268] | 0.957 | 0.974 | [0.64,1.483]  | 0.903 | 0.968 | [0.617,1.519] | 0.888 | 0.990 |
| rs215106   | ABCC1     | G | 0.115 | 1.039 | [0.729,1.482] | 0.831 | 0.987 | [0.498,1.953] | 0.969 | 0.949 | [0.46,1.959]  | 0.888 | 0.975 |
| rs2938395  | PPARG     | C | 0.339 | 0.902 | [0.7,1.163]   | 0.427 | 0.934 | [0.592,1.476] | 0.771 | 1.036 | [0.634,1.692] | 0.888 | 0.717 |
| rs4251545  | IRAK4     | A | 0.136 | 0.762 | [0.522,1.112] | 0.158 | 0.724 | [0.376,1.393] | 0.333 | 0.950 | [0.465,1.943] | 0.889 | 0.268 |
| rs12338    | CTSB      | G | 0.361 | 1.340 | [1.048,1.715] | 0.020 | 1.387 | [0.886,2.171] | 0.152 | 1.035 | [0.641,1.67]  | 0.889 | 0.036 |
| rs6817280  | HELQ      | A | 0.053 | 1.032 | [0.523,2.035] | 0.928 | 1.115 | [0.427,2.908] | 0.824 | 1.080 | [0.363,3.214] | 0.889 | 0.974 |
| rs3112831  | ABCA4     | G | 0.294 | 0.978 | [0.764,1.251] | 0.857 | 1.012 | [0.643,1.59]  | 0.960 | 1.035 | [0.638,1.679] | 0.890 | 0.981 |
| rs853783   | ABCB11    | T | 0.467 | 1.075 | [0.852,1.355] | 0.543 | 1.109 | [0.733,1.676] | 0.625 | 1.032 | [0.662,1.609] | 0.890 | 0.765 |
| rs4341514  | IGF2      | T | 0.422 | 0.983 | [0.774,1.249] | 0.891 | 0.952 | [0.612,1.479] | 0.825 | 0.968 | [0.604,1.551] | 0.891 | 0.970 |
| rs2228226  | ARHGAP9   | G | 0.325 | 0.944 | [0.735,1.213] | 0.653 | 0.977 | [0.618,1.544] | 0.921 | 1.035 | [0.633,1.692] | 0.891 | 0.903 |
| rs1805331  | RAD23B    | A | 0.067 | 1.115 | [0.681,1.824] | 0.665 | 1.041 | [0.413,2.626] | 0.931 | 0.934 | [0.348,2.507] | 0.892 | 0.910 |
| rs2069812  | IL5       | T | 0.394 | 0.913 | [0.708,1.179] | 0.487 | 0.946 | [0.588,1.522] | 0.819 | 1.036 | [0.623,1.721] | 0.892 | 0.778 |
| rs1165678  | HSP90B1   | G | 0.363 | 1.112 | [0.877,1.411] | 0.382 | 1.076 | [0.691,1.676] | 0.744 | 0.968 | [0.603,1.553] | 0.892 | 0.667 |
| rs4073     | IL8       | T | 0.470 | 1.046 | [0.822,1.332] | 0.714 | 1.081 | [0.698,1.673] | 0.728 | 1.033 | [0.646,1.651] | 0.893 | 0.894 |
| rs7311358  | SLCO1B3   | G | 0.215 | 1.501 | [1.112,2.027] | 0.008 | 1.559 | [0.937,2.595] | 0.088 | 1.038 | [0.601,1.795] | 0.893 | 0.013 |
| rs578430   | MUSK      | T | 0.058 | 1.239 | [0.715,2.146] | 0.445 | 1.323 | [0.55,3.186]  | 0.532 | 1.068 | [0.409,2.788] | 0.893 | 0.656 |
| rs5742671  | IGF1      | T | 0.143 | 0.822 | [0.581,1.164] | 0.270 | 0.861 | [0.452,1.64]  | 0.649 | 1.048 | [0.524,2.093] | 0.895 | 0.517 |
| rs1805034  | TNFRSF11A | C | 0.444 | 0.821 | [0.648,1.04]  | 0.102 | 0.796 | [0.522,1.215] | 0.291 | 0.970 | [0.616,1.528] | 0.896 | 0.186 |
| rs667565   | DPYD      | G | 0.395 | 1.147 | [0.909,1.447] | 0.248 | 1.181 | [0.784,1.778] | 0.426 | 1.030 | [0.663,1.598] | 0.896 | 0.420 |
| rs2228224  | GLI1      | G | 0.471 | 0.962 | [0.753,1.228] | 0.754 | 0.993 | [0.636,1.55]  | 0.974 | 1.032 | [0.64,1.665]  | 0.896 | 0.952 |
| rs5742666  | IGF1      | G | 0.232 | 0.892 | [0.67,1.186]  | 0.430 | 0.859 | [0.512,1.442] | 0.566 | 0.964 | [0.552,1.682] | 0.896 | 0.655 |
| rs3828855  | BYSL      | A | 0.097 | 1.274 | [0.864,1.879] | 0.222 | 1.336 | [0.682,2.617] | 0.398 | 1.049 | [0.511,2.152] | 0.897 | 0.383 |
| rs709816   | NBN       | G | 0.451 | 1.032 | [0.815,1.306] | 0.795 | 1.001 | [0.651,1.538] | 0.997 | 0.970 | [0.611,1.539] | 0.897 | 0.966 |
| rs2252784  | PTPRB     | A | 0.464 | 1.259 | [0.995,1.594] | 0.055 | 1.298 | [0.844,1.997] | 0.235 | 1.031 | [0.65,1.635]  | 0.897 | 0.104 |
| rs1367117  | APOB      | A | 0.288 | 1.102 | [0.852,1.427] | 0.460 | 1.139 | [0.716,1.812] | 0.583 | 1.033 | [0.629,1.699] | 0.897 | 0.689 |

|            |            |   |       |       |               |       |       |               |       |       |                |       |       |
|------------|------------|---|-------|-------|---------------|-------|-------|---------------|-------|-------|----------------|-------|-------|
| rs4342522  | SHFM1      | A | 0.296 | 1.228 | [0.937,1.609] | 0.136 | 1.187 | [0.732,1.924] | 0.487 | 0.967 | [0.576,1.623]  | 0.898 | 0.293 |
| rs1063742  | TACC3      | T | 0.244 | 0.911 | [0.689,1.204] | 0.512 | 0.878 | [0.519,1.485] | 0.626 | 0.964 | [0.548,1.695]  | 0.898 | 0.741 |
| rs11989    | Magmas     | T | 0.077 | 1.235 | [0.781,1.953] | 0.367 | 1.307 | [0.576,2.963] | 0.522 | 1.058 | [0.441,2.539]  | 0.899 | 0.585 |
| rs2232642  | LIG4       | A | 0.024 | 1.636 | [0.731,3.661] | 0.231 | 1.498 | [0.436,5.147] | 0.521 | 0.916 | [0.236,3.562]  | 0.899 | 0.441 |
| rs9932251  | NFATC3     | A | 0.171 | 1.023 | [0.758,1.381] | 0.883 | 1.060 | [0.624,1.801] | 0.828 | 1.037 | [0.586,1.835]  | 0.901 | 0.970 |
| rs3798134  | RAD50      | T | 0.238 | 1.069 | [0.811,1.41]  | 0.634 | 1.033 | [0.62,1.72]   | 0.901 | 0.966 | [0.56,1.667]   | 0.901 | 0.891 |
| rs3735481  | PPIA       | A | 0.279 | 1.227 | [0.942,1.598] | 0.129 | 1.266 | [0.797,2.012] | 0.318 | 1.032 | [0.629,1.694]  | 0.901 | 0.236 |
| rs2072501  | ZNF71      | A | 0.191 | 0.968 | [0.69,1.358]  | 0.850 | 1.010 | [0.537,1.902] | 0.975 | 1.044 | [0.531,2.052]  | 0.901 | 0.981 |
| rs2269800  | ABCC1      | G | 0.135 | 0.963 | [0.675,1.372] | 0.833 | 0.923 | [0.494,1.723] | 0.801 | 0.958 | [0.488,1.882]  | 0.902 | 0.953 |
| rs275704   | Intergenic | G | 0.317 | 0.828 | [0.624,1.1]   | 0.193 | 0.857 | [0.513,1.432] | 0.557 | 1.035 | [0.596,1.798]  | 0.902 | 0.392 |
| rs1054875  | POLG       | T | 0.436 | 0.975 | [0.764,1.245] | 0.841 | 0.947 | [0.606,1.479] | 0.811 | 0.971 | [0.602,1.566]  | 0.903 | 0.958 |
| rs1538660  | IKBKAP     | T | 0.200 | 0.866 | [0.637,1.177] | 0.358 | 0.899 | [0.515,1.567] | 0.706 | 1.038 | [0.57,1.888]   | 0.904 | 0.634 |
| rs2066534  | FMO3       | G | 0.226 | 1.084 | [0.833,1.412] | 0.548 | 1.118 | [0.704,1.775] | 0.637 | 1.031 | [0.628,1.694]  | 0.904 | 0.775 |
| rs1934951  | CYP2C8     | A | 0.201 | 1.121 | [0.838,1.501] | 0.442 | 1.084 | [0.645,1.82]  | 0.762 | 0.967 | [0.554,1.687]  | 0.905 | 0.731 |
| rs8058690  | NFATC3     | G | 0.171 | 1.022 | [0.757,1.38]  | 0.888 | 1.058 | [0.623,1.797] | 0.835 | 1.035 | [0.585,1.833]  | 0.905 | 0.972 |
| rs2953993  | POLB       | A | 0.179 | 0.860 | [0.588,1.257] | 0.435 | 0.824 | [0.432,1.571] | 0.556 | 0.958 | [0.474,1.936]  | 0.905 | 0.655 |
| rs581002   | MRE11A     | T | 0.246 | 1.219 | [0.935,1.59]  | 0.142 | 1.258 | [0.772,2.05]  | 0.356 | 1.032 | [0.615,1.732]  | 0.906 | 0.266 |
| rs3204145  | IKBKAP     | A | 0.201 | 0.856 | [0.629,1.163] | 0.320 | 0.887 | [0.508,1.548] | 0.674 | 1.037 | [0.569,1.888]  | 0.906 | 0.585 |
| rs2069391  | CDK2       | T | 0.076 | 1.025 | [0.666,1.578] | 0.911 | 0.976 | [0.453,2.1]   | 0.950 | 0.952 | [0.419,2.163]  | 0.906 | 0.990 |
| rs2274760  | GSTA4      | C | 0.098 | 1.219 | [0.843,1.762] | 0.293 | 1.271 | [0.65,2.485]  | 0.483 | 1.043 | [0.513,2.123]  | 0.907 | 0.498 |
| rs8252     | GADD45G    | A | 0.046 | 1.323 | [0.802,2.182] | 0.274 | 1.393 | [0.618,3.137] | 0.424 | 1.053 | [0.442,2.507]  | 0.907 | 0.459 |
| rs6544718  | ABCG8      | T | 0.189 | 0.872 | [0.643,1.184] | 0.380 | 0.904 | [0.51,1.603]  | 0.730 | 1.036 | [0.562,1.913]  | 0.909 | 0.662 |
| rs2686184  | FDFT1      | A | 0.408 | 0.866 | [0.676,1.109] | 0.254 | 0.842 | [0.534,1.327] | 0.458 | 0.972 | [0.596,1.584]  | 0.909 | 0.438 |
| rs4774584  | CYP19A1    | A | 0.450 | 0.951 | [0.757,1.194] | 0.665 | 0.975 | [0.651,1.46]  | 0.903 | 1.026 | [0.664,1.584]  | 0.909 | 0.909 |
| rs6802898  | PPARG      | T | 0.218 | 1.144 | [0.837,1.562] | 0.399 | 1.183 | [0.688,2.036] | 0.543 | 1.035 | [0.575,1.862]  | 0.909 | 0.619 |
| rs2979895  | POLB       | C | 0.174 | 0.880 | [0.601,1.287] | 0.509 | 0.844 | [0.441,1.615] | 0.609 | 0.960 | [0.474,1.944]  | 0.909 | 0.735 |
| rs1870377  | KDR        | A | 0.228 | 1.134 | [0.853,1.506] | 0.387 | 1.097 | [0.644,1.868] | 0.734 | 0.968 | [0.548,1.708]  | 0.910 | 0.671 |
| rs16845759 | TNFSF10    | T | 0.013 | 1.507 | [0.486,4.669] | 0.477 | 1.355 | [0.261,7.049] | 0.718 | 0.899 | [0.144,5.617]  | 0.910 | 0.754 |
| rs186556   | SLC29A1    | T | 0.014 | 1.533 | [0.526,4.467] | 0.434 | 1.697 | [0.348,8.283] | 0.513 | 1.107 | [0.19,6.456]   | 0.910 | 0.638 |
| rs11700112 | PAK7       | G | 0.099 | 1.121 | [0.78,1.612]  | 0.537 | 1.168 | [0.598,2.282] | 0.649 | 1.042 | [0.51,2.128]   | 0.910 | 0.772 |
| rs3176878  | VCAM1      | T | 0.160 | 0.878 | [0.625,1.232] | 0.451 | 0.912 | [0.496,1.677] | 0.766 | 1.038 | [0.537,2.007]  | 0.911 | 0.738 |
| rs2303929  | SLC4A2     | A | 0.229 | 0.856 | [0.65,1.127]  | 0.268 | 0.883 | [0.529,1.475] | 0.635 | 1.032 | [0.596,1.785]  | 0.911 | 0.514 |
| rs10264952 | STK31      | A | 0.155 | 0.898 | [0.645,1.251] | 0.524 | 0.864 | [0.46,1.623]  | 0.650 | 0.963 | [0.491,1.887]  | 0.912 | 0.761 |
| rs1009373  | CD40       | T | 0.215 | 1.272 | [0.959,1.687] | 0.096 | 1.233 | [0.736,2.064] | 0.426 | 0.969 | [0.56,1.678]   | 0.912 | 0.215 |
| rs207905   | XRCC5      | G | 0.139 | 0.932 | [0.662,1.313] | 0.686 | 0.967 | [0.529,1.768] | 0.912 | 1.037 | [0.542,1.986]  | 0.912 | 0.921 |
| rs1046428  | GSTZ1      | T | 0.177 | 1.044 | [0.767,1.422] | 0.784 | 1.008 | [0.565,1.8]   | 0.978 | 0.966 | [0.52,1.793]   | 0.912 | 0.963 |
| rs1801426  | BRCA2      | G | 0.022 | 1.303 | [0.594,2.855] | 0.509 | 1.205 | [0.335,4.332] | 0.775 | 0.925 | [0.232,3.689]  | 0.912 | 0.792 |
| rs2270132  | BLM        | G | 0.384 | 1.120 | [0.877,1.431] | 0.365 | 1.091 | [0.697,1.706] | 0.704 | 0.974 | [0.603,1.571]  | 0.913 | 0.642 |
| rs10018625 | TLR3       | T | 0.258 | 0.918 | [0.699,1.206] | 0.540 | 0.892 | [0.546,1.456] | 0.647 | 0.971 | [0.572,1.647]  | 0.914 | 0.771 |
| rs2071336  | TNFRSF17   | T | 0.040 | 1.039 | [0.594,1.817] | 0.893 | 1.098 | [0.439,2.747] | 0.842 | 1.056 | [0.393,2.841]  | 0.914 | 0.975 |
| rs2228088  | TNF        | T | 0.014 | 0.493 | [0.139,1.744] | 0.273 | 0.561 | [0.07,4.503]  | 0.587 | 1.138 | [0.109,11.906] | 0.914 | 0.494 |

|            |              |   |       |       |               |       |       |               |       |       |               |       |       |
|------------|--------------|---|-------|-------|---------------|-------|-------|---------------|-------|-------|---------------|-------|-------|
| rs3730017  | NOS2         | T | 0.062 | 0.903 | [0.523,1.561] | 0.716 | 0.856 | [0.352,2.083] | 0.732 | 0.948 | [0.357,2.514] | 0.914 | 0.896 |
| rs2303400  | XRCC5        | C | 0.402 | 0.926 | [0.728,1.178] | 0.533 | 0.950 | [0.62,1.456]  | 0.814 | 1.026 | [0.647,1.625] | 0.914 | 0.814 |
| rs1805404  | PARP1        | T | 0.171 | 1.122 | [0.822,1.533] | 0.469 | 1.159 | [0.666,2.019] | 0.602 | 1.033 | [0.57,1.871]  | 0.914 | 0.705 |
| rs7175052  | IGF1R        | A | 0.221 | 1.038 | [0.785,1.372] | 0.795 | 1.008 | [0.612,1.658] | 0.976 | 0.971 | [0.568,1.66]  | 0.915 | 0.967 |
| rs532411   | POLQ         | T | 0.084 | 0.936 | [0.597,1.469] | 0.775 | 0.979 | [0.46,2.084]  | 0.956 | 1.046 | [0.458,2.388] | 0.916 | 0.960 |
| rs2645444  | FDFT1        | G | 0.182 | 0.882 | [0.655,1.188] | 0.409 | 0.910 | [0.534,1.55]  | 0.728 | 1.031 | [0.58,1.834]  | 0.916 | 0.691 |
| rs3218634  | POLQ         | G | 0.083 | 0.949 | [0.605,1.491] | 0.822 | 0.992 | [0.466,2.109] | 0.983 | 1.045 | [0.458,2.383] | 0.918 | 0.975 |
| rs1801275  | IL4R         | G | 0.302 | 0.947 | [0.722,1.243] | 0.695 | 0.973 | [0.602,1.573] | 0.912 | 1.027 | [0.613,1.723] | 0.918 | 0.925 |
| rs11547883 | VRK3         | G | 0.030 | 1.379 | [0.673,2.823] | 0.380 | 1.462 | [0.536,3.991] | 0.458 | 1.061 | [0.343,3.282] | 0.919 | 0.568 |
| rs10501815 | MRE11A       | A | 0.092 | 0.813 | [0.54,1.222]  | 0.319 | 0.848 | [0.394,1.824] | 0.673 | 1.044 | [0.458,2.376] | 0.919 | 0.582 |
| rs2229113  | IL10RA       | A | 0.291 | 1.168 | [0.908,1.501] | 0.227 | 1.138 | [0.723,1.793] | 0.576 | 0.975 | [0.599,1.587] | 0.919 | 0.447 |
| rs2308327  | LOC100129103 | G | 0.100 | 0.742 | [0.494,1.116] | 0.152 | 0.775 | [0.356,1.687] | 0.520 | 1.044 | [0.453,2.406] | 0.920 | 0.320 |
| rs8659     | MTRR         | T | 0.368 | 1.005 | [0.772,1.308] | 0.972 | 0.979 | [0.607,1.578] | 0.930 | 0.974 | [0.584,1.625] | 0.921 | 0.995 |
| rs2053098  | SLCO1B3      | A | 0.216 | 1.503 | [1.114,2.027] | 0.008 | 1.545 | [0.928,2.571] | 0.094 | 1.028 | [0.595,1.776] | 0.921 | 0.013 |
| rs2241766  | ADIPOQ       | G | 0.104 | 0.907 | [0.628,1.31]  | 0.604 | 0.875 | [0.438,1.746] | 0.704 | 0.964 | [0.46,2.019]  | 0.923 | 0.832 |
| rs1757095  | TNC          | T | 0.067 | 1.089 | [0.678,1.751] | 0.724 | 1.138 | [0.494,2.621] | 0.761 | 1.045 | [0.426,2.56]  | 0.924 | 0.910 |
| rs1536826  | CYP2E1       | A | 0.305 | 0.901 | [0.673,1.206] | 0.481 | 0.876 | [0.51,1.502]  | 0.630 | 0.972 | [0.546,1.733] | 0.924 | 0.723 |
| rs2434470  | ALKBH3       | G | 0.222 | 1.048 | [0.792,1.386] | 0.743 | 1.076 | [0.645,1.795] | 0.779 | 1.027 | [0.594,1.774] | 0.925 | 0.922 |
| rs2069456  | CDK5         | C | 0.250 | 0.949 | [0.73,1.234]  | 0.696 | 0.972 | [0.605,1.563] | 0.908 | 1.025 | [0.616,1.705] | 0.925 | 0.925 |
| rs512535   | APOB         | G | 0.487 | 0.856 | [0.669,1.096] | 0.218 | 0.876 | [0.557,1.379] | 0.568 | 1.023 | [0.63,1.661]  | 0.925 | 0.432 |
| rs10733103 | HSD3B1       | G | 0.332 | 1.169 | [0.908,1.505] | 0.226 | 1.142 | [0.73,1.789]  | 0.560 | 0.977 | [0.604,1.582] | 0.925 | 0.441 |
| rs609636   | CYP4F12      | T | 0.061 | 0.380 | [0.202,0.713] | 0.003 | 0.404 | [0.123,1.324] | 0.135 | 1.064 | [0.289,3.919] | 0.925 | 0.005 |
| rs609290   | CYP4F12      | T | 0.061 | 0.380 | [0.202,0.714] | 0.003 | 0.404 | [0.123,1.325] | 0.135 | 1.064 | [0.289,3.918] | 0.926 | 0.005 |
| rs2470890  | CYP1A2       | C | 0.488 | 1.058 | [0.829,1.35]  | 0.651 | 1.082 | [0.692,1.69]  | 0.730 | 1.023 | [0.634,1.649] | 0.927 | 0.867 |
| rs7889839  | FMO6         | G | 0.165 | 1.226 | [0.915,1.644] | 0.173 | 1.258 | [0.75,2.111]  | 0.384 | 1.026 | [0.591,1.782] | 0.927 | 0.318 |
| rs2073618  | TNFRSF11B    | C | 0.460 | 0.790 | [0.613,1.017] | 0.068 | 0.772 | [0.489,1.219] | 0.267 | 0.977 | [0.598,1.597] | 0.927 | 0.130 |
| rs1800686  | CD40         | A | 0.215 | 1.258 | [0.947,1.671] | 0.113 | 1.227 | [0.73,2.062]  | 0.441 | 0.975 | [0.561,1.695] | 0.929 | 0.246 |
| rs2255235  | B2M          | T | 0.159 | 1.248 | [0.895,1.739] | 0.191 | 1.213 | [0.686,2.147] | 0.506 | 0.972 | [0.526,1.797] | 0.929 | 0.381 |
| rs6046     | F7           | T | 0.113 | 1.028 | [0.711,1.487] | 0.882 | 1.062 | [0.55,2.049]  | 0.858 | 1.033 | [0.509,2.096] | 0.929 | 0.976 |
| rs3740469  | SLK          | A | 0.204 | 0.880 | [0.657,1.18]  | 0.393 | 0.904 | [0.526,1.551] | 0.713 | 1.027 | [0.575,1.833] | 0.929 | 0.671 |
| rs7886938  | FMO6         | A | 0.165 | 1.230 | [0.917,1.649] | 0.167 | 1.261 | [0.752,2.115] | 0.380 | 1.025 | [0.59,1.78]   | 0.930 | 0.309 |
| rs2544773  | RIOK2        | C | 0.360 | 0.943 | [0.737,1.208] | 0.643 | 0.923 | [0.586,1.454] | 0.729 | 0.978 | [0.602,1.59]  | 0.930 | 0.863 |
| rs389480   | BLM          | T | 0.470 | 1.143 | [0.907,1.44]  | 0.258 | 1.166 | [0.769,1.768] | 0.470 | 1.020 | [0.653,1.595] | 0.930 | 0.449 |
| rs1800871  | IL10         | T | 0.281 | 0.971 | [0.746,1.264] | 0.827 | 0.993 | [0.622,1.586] | 0.977 | 1.023 | [0.618,1.693] | 0.930 | 0.976 |
| rs1800378  | VWF          | A | 0.429 | 1.032 | [0.808,1.319] | 0.800 | 1.054 | [0.675,1.646] | 0.815 | 1.022 | [0.634,1.647] | 0.930 | 0.949 |
| rs2363642  | GSTZ1        | T | 0.291 | 0.883 | [0.683,1.141] | 0.341 | 0.863 | [0.54,1.379]  | 0.538 | 0.978 | [0.591,1.618] | 0.930 | 0.563 |
| rs165974   | ABCC1        | T | 0.144 | 1.017 | [0.726,1.424] | 0.924 | 1.046 | [0.569,1.926] | 0.884 | 1.029 | [0.536,1.979] | 0.931 | 0.987 |
| rs2300095  | FRAP1        | T | 0.320 | 1.127 | [0.872,1.456] | 0.361 | 1.151 | [0.729,1.82]  | 0.546 | 1.022 | [0.625,1.669] | 0.932 | 0.588 |
| rs1061302  | NBN          | G | 0.309 | 1.147 | [0.901,1.461] | 0.265 | 1.171 | [0.753,1.821] | 0.483 | 1.021 | [0.636,1.638] | 0.933 | 0.461 |
| rs1885472  | SIRT1        | G | 0.361 | 1.197 | [0.943,1.519] | 0.139 | 1.221 | [0.794,1.878] | 0.364 | 1.020 | [0.644,1.616] | 0.933 | 0.264 |
| rs1348161  | PPP3CA       | A | 0.398 | 1.154 | [0.898,1.484] | 0.263 | 1.130 | [0.713,1.791] | 0.602 | 0.979 | [0.599,1.6]   | 0.933 | 0.501 |

|            |              |   |       |       |               |       |       |               |       |       |               |       |       |
|------------|--------------|---|-------|-------|---------------|-------|-------|---------------|-------|-------|---------------|-------|-------|
| rs6334     | NTRK1        | A | 0.198 | 1.043 | [0.766,1.42]  | 0.789 | 1.017 | [0.586,1.766] | 0.952 | 0.975 | [0.538,1.767] | 0.934 | 0.965 |
| rs2230806  | ABCA1        | A | 0.331 | 0.854 | [0.654,1.116] | 0.248 | 0.836 | [0.523,1.338] | 0.455 | 0.979 | [0.59,1.624]  | 0.934 | 0.432 |
| rs5974     | F11          | G | 0.157 | 1.031 | [0.75,1.417]  | 0.850 | 1.005 | [0.565,1.787] | 0.986 | 0.975 | [0.526,1.808] | 0.936 | 0.982 |
| rs2072351  | BLM          | T | 0.326 | 0.857 | [0.664,1.104] | 0.233 | 0.840 | [0.537,1.313] | 0.444 | 0.980 | [0.605,1.588] | 0.936 | 0.408 |
| rs4073054  | NR1I3        | G | 0.346 | 0.930 | [0.73,1.184]  | 0.557 | 0.912 | [0.589,1.412] | 0.681 | 0.981 | [0.614,1.569] | 0.936 | 0.796 |
| rs1938484  | LEPR         | A | 0.205 | 1.189 | [0.901,1.57]  | 0.222 | 1.215 | [0.739,1.998] | 0.443 | 1.022 | [0.601,1.739] | 0.937 | 0.399 |
| rs459552   | APC          | A | 0.198 | 0.856 | [0.629,1.165] | 0.323 | 0.877 | [0.502,1.532] | 0.645 | 1.025 | [0.562,1.869] | 0.937 | 0.580 |
| rs3217772  | CCNA2        | C | 0.350 | 0.910 | [0.71,1.167]  | 0.458 | 0.928 | [0.583,1.478] | 0.754 | 1.020 | [0.621,1.676] | 0.937 | 0.742 |
| rs17112809 | MMS19        | T | 0.030 | 1.651 | [0.809,3.37]  | 0.169 | 1.735 | [0.556,5.413] | 0.343 | 1.051 | [0.305,3.625] | 0.937 | 0.297 |
| rs2165627  | PTPRB        | G | 0.137 | 0.902 | [0.64,1.271]  | 0.555 | 0.878 | [0.475,1.624] | 0.679 | 0.974 | [0.501,1.891] | 0.937 | 0.793 |
| rs11862958 | TNFRSF17     | T | 0.311 | 0.859 | [0.667,1.107] | 0.240 | 0.876 | [0.548,1.403] | 0.583 | 1.020 | [0.616,1.691] | 0.938 | 0.462 |
| rs12456560 | NDC80        | T | 0.124 | 1.330 | [0.945,1.872] | 0.102 | 1.295 | [0.69,2.434]  | 0.421 | 0.974 | [0.499,1.902] | 0.938 | 0.225 |
| rs680695   | MRE11A       | G | 0.304 | 1.123 | [0.872,1.447] | 0.370 | 1.145 | [0.721,1.819] | 0.567 | 1.020 | [0.623,1.67]  | 0.939 | 0.606 |
| rs2069835  | IL6          | C | 0.070 | 0.828 | [0.517,1.327] | 0.433 | 0.858 | [0.367,2.005] | 0.724 | 1.037 | [0.412,2.606] | 0.939 | 0.710 |
| rs1341163  | CYP2C8       | A | 0.388 | 1.032 | [0.809,1.317] | 0.797 | 1.052 | [0.675,1.639] | 0.824 | 1.019 | [0.633,1.64]  | 0.939 | 0.950 |
| rs1934985  | CYP2C8       | G | 0.388 | 1.032 | [0.809,1.317] | 0.797 | 1.052 | [0.675,1.639] | 0.824 | 1.019 | [0.633,1.64]  | 0.939 | 0.950 |
| rs2275620  | CYP2C8       | T | 0.388 | 1.032 | [0.809,1.317] | 0.797 | 1.052 | [0.675,1.639] | 0.824 | 1.019 | [0.633,1.64]  | 0.939 | 0.950 |
| rs1544094  | LOC100130458 | C | 0.191 | 1.179 | [0.846,1.643] | 0.331 | 1.208 | [0.676,2.158] | 0.524 | 1.024 | [0.547,1.918] | 0.940 | 0.548 |
| rs9503893  | PRPF4B       | A | 0.311 | 0.898 | [0.691,1.168] | 0.423 | 0.881 | [0.548,1.416] | 0.601 | 0.981 | [0.589,1.634] | 0.941 | 0.665 |
| rs1736557  | FMO3         | A | 0.072 | 0.605 | [0.36,1.015]  | 0.057 | 0.581 | [0.22,1.533]  | 0.273 | 0.961 | [0.337,2.74]  | 0.941 | 0.110 |
| rs1800738  | TPP1         | T | 0.468 | 1.095 | [0.858,1.399] | 0.465 | 1.115 | [0.72,1.727]  | 0.626 | 1.018 | [0.636,1.628] | 0.941 | 0.711 |
| rs894469   | FMO5         | G | 0.082 | 0.779 | [0.502,1.21]  | 0.266 | 0.755 | [0.35,1.628]  | 0.473 | 0.969 | [0.42,2.237]  | 0.942 | 0.455 |
| rs16876805 | PSKH2        | C | 0.032 | 1.359 | [0.683,2.705] | 0.382 | 1.418 | [0.508,3.959] | 0.505 | 1.043 | [0.337,3.225] | 0.942 | 0.597 |
| rs2269112  | BRPF1        | T | 0.158 | 0.995 | [0.718,1.378] | 0.975 | 1.018 | [0.566,1.831] | 0.951 | 1.024 | [0.546,1.921] | 0.942 | 0.997 |
| rs2066530  | FMO3         | C | 0.011 | 1.012 | [0.302,3.391] | 0.984 | 0.934 | [0.133,6.536] | 0.945 | 0.922 | [0.103,8.264] | 0.942 | 0.997 |
| rs2480452  | PPP2R4       | A | 0.062 | 0.862 | [0.532,1.399] | 0.549 | 0.894 | [0.349,2.291] | 0.816 | 1.037 | [0.38,2.829]  | 0.943 | 0.825 |
| rs3740066  | ABCC2        | A | 0.347 | 1.259 | [0.981,1.615] | 0.070 | 1.280 | [0.815,2.011] | 0.284 | 1.017 | [0.628,1.648] | 0.945 | 0.139 |
| rs4764883  | IGF1         | C | 0.329 | 0.849 | [0.655,1.1]   | 0.215 | 0.864 | [0.541,1.379] | 0.539 | 1.017 | [0.615,1.682] | 0.946 | 0.420 |
| rs3087243  | CTLA4        | A | 0.378 | 0.984 | [0.766,1.264] | 0.901 | 0.968 | [0.619,1.513] | 0.887 | 0.984 | [0.608,1.591] | 0.946 | 0.985 |
| rs3897933  | DPYD         | A | 0.276 | 0.940 | [0.726,1.216] | 0.636 | 0.924 | [0.583,1.464] | 0.736 | 0.983 | [0.599,1.615] | 0.947 | 0.861 |
| rs246240   | ABCC1        | G | 0.146 | 1.053 | [0.752,1.474] | 0.764 | 1.030 | [0.56,1.895]  | 0.925 | 0.978 | [0.509,1.879] | 0.947 | 0.955 |
| rs10018618 | C1QTNF7      | C | 0.047 | 1.264 | [0.648,2.465] | 0.492 | 1.313 | [0.476,3.621] | 0.599 | 1.039 | [0.337,3.204] | 0.947 | 0.721 |
| rs3204141  | ZHX2         | A | 0.284 | 1.050 | [0.8,1.378]   | 0.726 | 1.069 | [0.647,1.766] | 0.795 | 1.018 | [0.596,1.74]  | 0.947 | 0.919 |
| rs6935443  | ESR1         | G | 0.279 | 1.226 | [0.929,1.619] | 0.150 | 1.248 | [0.76,2.05]   | 0.381 | 1.018 | [0.597,1.734] | 0.948 | 0.282 |
| rs2307340  | MCM5         | G | 0.068 | 0.590 | [0.35,0.995]  | 0.048 | 0.569 | [0.203,1.597] | 0.284 | 0.964 | [0.317,2.933] | 0.948 | 0.095 |
| rs3791878  | GAD1         | A | 0.252 | 0.889 | [0.679,1.164] | 0.392 | 0.905 | [0.547,1.496] | 0.696 | 1.018 | [0.595,1.741] | 0.949 | 0.667 |
| rs1548216  | IL6          | C | 0.055 | 1.295 | [0.764,2.195] | 0.337 | 1.334 | [0.573,3.106] | 0.504 | 1.030 | [0.41,2.586]  | 0.949 | 0.552 |
| rs1805415  | PARP1        | A | 0.174 | 1.141 | [0.842,1.545] | 0.396 | 1.162 | [0.675,2]     | 0.588 | 1.019 | [0.57,1.819]  | 0.950 | 0.639 |
| rs1063045  | NBN          | T | 0.324 | 1.181 | [0.931,1.498] | 0.170 | 1.164 | [0.758,1.786] | 0.488 | 0.985 | [0.622,1.56]  | 0.950 | 0.343 |
| rs2575875  | ABCA1        | A | 0.440 | 1.149 | [0.899,1.469] | 0.267 | 1.132 | [0.734,1.747] | 0.575 | 0.985 | [0.617,1.573] | 0.950 | 0.497 |
| rs2966245  | HSD17B2      | C | 0.401 | 1.113 | [0.876,1.413] | 0.381 | 1.096 | [0.71,1.692]  | 0.678 | 0.985 | [0.619,1.569] | 0.951 | 0.652 |

|            |          |   |       |       |               |       |       |                |       |       |                |       |       |
|------------|----------|---|-------|-------|---------------|-------|-------|----------------|-------|-------|----------------|-------|-------|
| rs10895065 | PGR      | A | 0.332 | 0.731 | [0.557,0.958] | 0.023 | 0.743 | [0.461,1.198]  | 0.222 | 1.016 | [0.606,1.704]  | 0.951 | 0.050 |
| rs1236913  | PTGS1    | T | 0.059 | 0.929 | [0.558,1.546] | 0.776 | 0.897 | [0.318,2.533]  | 0.838 | 0.966 | [0.32,2.912]   | 0.951 | 0.946 |
| rs3764340  | WVOX     | G | 0.065 | 0.931 | [0.568,1.525] | 0.777 | 0.905 | [0.39,2.099]   | 0.816 | 0.972 | [0.391,2.415]  | 0.951 | 0.943 |
| rs2235041  | ABCB1    | T | 0.013 | 2.012 | [0.654,6.185] | 0.222 | 2.125 | [0.423,10.678] | 0.360 | 1.056 | [0.181,6.173]  | 0.952 | 0.378 |
| rs6540964  | FRAP1    | C | 0.361 | 1.005 | [0.769,1.314] | 0.972 | 1.021 | [0.631,1.652]  | 0.934 | 1.016 | [0.606,1.702]  | 0.953 | 0.996 |
| rs1801701  | APOB     | A | 0.076 | 1.059 | [0.694,1.615] | 0.791 | 1.085 | [0.508,2.319]  | 0.833 | 1.025 | [0.454,2.315]  | 0.953 | 0.951 |
| rs2272615  | POLB     | G | 0.211 | 0.926 | [0.665,1.288] | 0.648 | 0.909 | [0.507,1.628]  | 0.747 | 0.981 | [0.523,1.842]  | 0.953 | 0.870 |
| rs4646421  | CYP1A1   | T | 0.173 | 1.151 | [0.848,1.563] | 0.367 | 1.171 | [0.692,1.982]  | 0.556 | 1.017 | [0.576,1.795]  | 0.953 | 0.599 |
| rs2257212  | SLC15A2  | A | 0.441 | 0.970 | [0.767,1.226] | 0.797 | 0.957 | [0.625,1.464]  | 0.838 | 0.986 | [0.625,1.558]  | 0.953 | 0.954 |
| rs10515783 | UBLCP1   | T | 0.289 | 0.859 | [0.662,1.116] | 0.255 | 0.872 | [0.544,1.397]  | 0.570 | 1.015 | [0.611,1.685]  | 0.954 | 0.479 |
| rs1143672  | SLC15A2  | A | 0.440 | 0.968 | [0.766,1.224] | 0.788 | 0.981 | [0.645,1.492]  | 0.929 | 1.013 | [0.645,1.592]  | 0.955 | 0.963 |
| rs8353     | KLHL22   | T | 0.200 | 0.956 | [0.715,1.278] | 0.762 | 0.940 | [0.545,1.621]  | 0.824 | 0.983 | [0.549,1.763]  | 0.955 | 0.939 |
| rs16932374 | VWF      | T | 0.029 | 1.232 | [0.579,2.618] | 0.588 | 1.275 | [0.425,3.829]  | 0.665 | 1.035 | [0.305,3.517]  | 0.956 | 0.814 |
| rs1060253  | SLC7A5   | G | 0.256 | 0.976 | [0.748,1.273] | 0.859 | 0.990 | [0.616,1.593]  | 0.968 | 1.014 | [0.609,1.689]  | 0.956 | 0.984 |
| rs5759197  | TSPO     | C | 0.426 | 1.353 | [1.066,1.718] | 0.013 | 1.371 | [0.89,2.11]    | 0.152 | 1.013 | [0.639,1.606]  | 0.957 | 0.026 |
| rs2228638  | NRP1     | A | 0.098 | 0.976 | [0.66,1.443]  | 0.903 | 0.956 | [0.478,1.911]  | 0.899 | 0.980 | [0.466,2.059]  | 0.957 | 0.987 |
| rs2235047  | ABCB1    | G | 0.051 | 1.644 | [0.955,2.829] | 0.073 | 1.602 | [0.666,3.856]  | 0.293 | 0.975 | [0.384,2.474]  | 0.957 | 0.158 |
| rs2242048  | SLC28A1  | T | 0.111 | 1.123 | [0.771,1.636] | 0.544 | 1.101 | [0.558,2.175]  | 0.781 | 0.980 | [0.473,2.032]  | 0.957 | 0.817 |
| rs1805335  | RAD23B   | A | 0.445 | 1.029 | [0.815,1.298] | 0.811 | 1.016 | [0.665,1.553]  | 0.940 | 0.988 | [0.627,1.557]  | 0.958 | 0.971 |
| rs7214723  | CAMKK1   | C | 0.402 | 1.088 | [0.859,1.378] | 0.484 | 1.075 | [0.701,1.649]  | 0.741 | 0.988 | [0.625,1.561]  | 0.959 | 0.762 |
| rs2066494  | RAD9A    | C | 0.024 | 1.646 | [0.815,3.327] | 0.165 | 1.591 | [0.472,5.37]   | 0.454 | 0.967 | [0.264,3.54]   | 0.959 | 0.333 |
| rs1639     | PON2     | G | 0.206 | 0.819 | [0.606,1.107] | 0.194 | 0.807 | [0.461,1.411]  | 0.451 | 0.985 | [0.54,1.795]   | 0.959 | 0.361 |
| rs1520664  | DPYD     | T | 0.386 | 0.994 | [0.782,1.264] | 0.961 | 0.982 | [0.638,1.511]  | 0.935 | 0.988 | [0.622,1.57]   | 0.960 | 0.996 |
| rs2278293  | IMPDH1   | A | 0.465 | 1.054 | [0.828,1.342] | 0.668 | 1.042 | [0.679,1.599]  | 0.852 | 0.988 | [0.622,1.57]   | 0.960 | 0.905 |
| rs871514   | UGT1A10  | G | 0.493 | 1.044 | [0.821,1.328] | 0.726 | 1.056 | [0.692,1.611]  | 0.799 | 1.012 | [0.642,1.595]  | 0.960 | 0.921 |
| rs1135961  | PSMA7    | T | 0.134 | 0.873 | [0.616,1.238] | 0.447 | 0.858 | [0.443,1.663]  | 0.650 | 0.982 | [0.482,2]      | 0.961 | 0.700 |
| rs2288548  | IMPDH1   | A | 0.237 | 1.034 | [0.794,1.346] | 0.803 | 1.048 | [0.647,1.696]  | 0.850 | 1.013 | [0.604,1.699]  | 0.961 | 0.957 |
| rs1962589  | IGF1R    | C | 0.186 | 1.159 | [0.842,1.596] | 0.365 | 1.177 | [0.673,2.059]  | 0.569 | 1.015 | [0.556,1.854]  | 0.961 | 0.601 |
| rs13428823 | EFR3B    | G | 0.399 | 0.978 | [0.773,1.237] | 0.852 | 0.967 | [0.635,1.472]  | 0.876 | 0.989 | [0.63,1.553]   | 0.961 | 0.974 |
| rs17773251 | CSNK1A1L | G | 0.090 | 0.921 | [0.607,1.397] | 0.699 | 0.939 | [0.453,1.948]  | 0.866 | 1.020 | [0.463,2.247]  | 0.962 | 0.921 |
| rs5496     | ICAM1    | A | 0.016 | 0.340 | [0.076,1.519] | 0.158 | 0.361 | [0.046,2.855]  | 0.334 | 1.061 | [0.091,12.417] | 0.962 | 0.254 |
| rs1805794  | NBN      | G | 0.309 | 1.164 | [0.915,1.481] | 0.217 | 1.151 | [0.743,1.783]  | 0.529 | 0.989 | [0.619,1.58]   | 0.962 | 0.419 |
| rs2229362  | BCL6     | A | 0.189 | 1.111 | [0.816,1.515] | 0.503 | 1.096 | [0.643,1.87]   | 0.736 | 0.986 | [0.555,1.752]  | 0.963 | 0.777 |
| rs3762412  | DPYD     | T | 0.308 | 0.904 | [0.707,1.155] | 0.419 | 0.893 | [0.561,1.422]  | 0.634 | 0.988 | [0.602,1.624]  | 0.963 | 0.673 |
| rs12448860 | FANCA    | A | 0.454 | 1.326 | [1.05,1.673]  | 0.018 | 1.340 | [0.877,2.048]  | 0.176 | 1.011 | [0.642,1.592]  | 0.963 | 0.035 |
| rs4883263  | CD163    | T | 0.102 | 0.901 | [0.588,1.383] | 0.635 | 0.885 | [0.44,1.78]    | 0.733 | 0.982 | [0.456,2.115]  | 0.963 | 0.859 |
| rs1570070  | IGF2R    | G | 0.347 | 0.789 | [0.613,1.017] | 0.068 | 0.799 | [0.503,1.267]  | 0.340 | 1.012 | [0.616,1.663]  | 0.963 | 0.145 |
| rs183484   | RRM1     | T | 0.454 | 0.982 | [0.773,1.246] | 0.879 | 0.993 | [0.635,1.552]  | 0.974 | 1.011 | [0.627,1.63]   | 0.963 | 0.988 |
| rs1063311  | MAPK1    | A | 0.393 | 0.934 | [0.728,1.198] | 0.589 | 0.944 | [0.598,1.491]  | 0.806 | 1.012 | [0.619,1.652]  | 0.964 | 0.851 |
| rs5742714  | IGF1     | C | 0.095 | 0.741 | [0.487,1.127] | 0.161 | 0.755 | [0.353,1.616]  | 0.469 | 1.019 | [0.446,2.331]  | 0.964 | 0.318 |
| rs1709182  | ESR1     | C | 0.316 | 0.920 | [0.715,1.185] | 0.520 | 0.910 | [0.567,1.46]   | 0.695 | 0.988 | [0.597,1.637]  | 0.964 | 0.775 |

|            |          |   |       |       |               |       |       |                  |       |       |                  |       |       |
|------------|----------|---|-------|-------|---------------|-------|-------|------------------|-------|-------|------------------|-------|-------|
| rs2070150  | ATF6     | C | 0.095 | 1.197 | [0.823,1.739] | 0.347 | 1.216 | [0.617,2.397]    | 0.571 | 1.017 | [0.496,2.085]    | 0.964 | 0.589 |
| rs348472   | ALDH1A1  | A | 0.098 | 0.982 | [0.64,1.507]  | 0.934 | 1.000 | [0.478,2.092]    | 1.000 | 1.018 | [0.457,2.269]    | 0.965 | 0.996 |
| rs1800925  | IL13     | T | 0.233 | 1.057 | [0.801,1.396] | 0.694 | 1.070 | [0.641,1.786]    | 0.795 | 1.012 | [0.585,1.751]    | 0.965 | 0.906 |
| rs4646034  | CASP9    | A | 0.444 | 1.233 | [0.977,1.557] | 0.078 | 1.221 | [0.796,1.872]    | 0.361 | 0.990 | [0.625,1.567]    | 0.965 | 0.168 |
| rs1139488  | ALAD     | C | 0.365 | 1.029 | [0.807,1.312] | 0.818 | 1.018 | [0.659,1.574]    | 0.935 | 0.990 | [0.62,1.58]      | 0.966 | 0.973 |
| rs638456   | DPYD     | C | 0.388 | 1.149 | [0.905,1.458] | 0.255 | 1.160 | [0.762,1.767]    | 0.490 | 1.010 | [0.643,1.587]    | 0.966 | 0.455 |
| rs1520663  | DPYD     | T | 0.385 | 1.000 | [0.786,1.272] | 0.999 | 0.990 | [0.644,1.524]    | 0.964 | 0.990 | [0.623,1.574]    | 0.967 | 0.999 |
| rs4986791  | TLR4     | T | 0.043 | 0.821 | [0.458,1.47]  | 0.506 | 0.000 | [0,5.770474E256] | 0.966 | 0.000 | [0,7.033067E256] | 0.967 | 0.801 |
| rs12806698 | RRM1     | A | 0.241 | 0.914 | [0.688,1.214] | 0.534 | 0.903 | [0.536,1.523]    | 0.703 | 0.988 | [0.564,1.73]     | 0.967 | 0.787 |
| rs2302524  | PLAUR    | C | 0.176 | 0.839 | [0.608,1.157] | 0.284 | 0.850 | [0.474,1.522]    | 0.584 | 1.013 | [0.541,1.899]    | 0.967 | 0.517 |
| rs3740955  | RAG1     | G | 0.418 | 1.074 | [0.846,1.363] | 0.558 | 1.064 | [0.686,1.649]    | 0.783 | 0.990 | [0.619,1.584]    | 0.968 | 0.826 |
| rs2296239  | CYP24A1  | T | 0.274 | 1.014 | [0.782,1.314] | 0.915 | 1.025 | [0.64,1.639]     | 0.919 | 1.010 | [0.611,1.67]     | 0.968 | 0.991 |
| rs4947324  | TNF      | T | 0.102 | 1.431 | [0.995,2.057] | 0.053 | 1.412 | [0.756,2.638]    | 0.279 | 0.987 | [0.507,1.922]    | 0.969 | 0.115 |
| rs7201683  | WVVOX    | G | 0.031 | 0.517 | [0.238,1.126] | 0.097 | 0.000 | [0,2.470432E271] | 0.968 | 0.000 | [0,4.778227E271] | 0.969 | 0.251 |
| rs35766    | IGF1     | G | 0.246 | 0.844 | [0.632,1.126] | 0.249 | 0.853 | [0.51,1.427]     | 0.545 | 1.011 | [0.581,1.758]    | 0.969 | 0.465 |
| rs35621    | ABCC1    | T | 0.113 | 1.302 | [0.915,1.853] | 0.142 | 1.286 | [0.691,2.39]     | 0.427 | 0.987 | [0.508,1.917]    | 0.970 | 0.290 |
| rs1800872  | IL10     | A | 0.281 | 0.969 | [0.744,1.26]  | 0.812 | 0.959 | [0.602,1.529]    | 0.862 | 0.990 | [0.599,1.638]    | 0.970 | 0.962 |
| rs2303428  | MSH2     | C | 0.106 | 0.739 | [0.499,1.095] | 0.132 | 0.751 | [0.353,1.596]    | 0.456 | 1.015 | [0.452,2.281]    | 0.970 | 0.272 |
| rs2071724  | TTLL12   | A | 0.418 | 0.971 | [0.77,1.225]  | 0.807 | 0.963 | [0.634,1.463]    | 0.861 | 0.992 | [0.633,1.553]    | 0.971 | 0.961 |
| rs419029   | TNFRSF17 | A | 0.016 | 1.712 | [0.732,4.007] | 0.215 | 1.666 | [0.409,6.782]    | 0.476 | 0.973 | [0.224,4.229]    | 0.971 | 0.420 |
| rs478333   | ABCB11   | C | 0.500 | 1.170 | [0.931,1.47]  | 0.179 | 1.160 | [0.767,1.756]    | 0.482 | 0.992 | [0.636,1.546]    | 0.971 | 0.353 |
| rs2286940  | MLH1     | T | 0.390 | 0.976 | [0.766,1.245] | 0.845 | 0.985 | [0.631,1.535]    | 0.945 | 1.009 | [0.627,1.623]    | 0.972 | 0.980 |
| rs16944831 | BLM      | T | 0.085 | 1.141 | [0.731,1.781] | 0.560 | 1.125 | [0.551,2.298]    | 0.746 | 0.986 | [0.45,2.163]     | 0.972 | 0.819 |
| rs1496499  | IGFBP3   | T | 0.487 | 1.023 | [0.811,1.289] | 0.850 | 1.031 | [0.678,1.567]    | 0.887 | 1.008 | [0.643,1.58]     | 0.972 | 0.976 |
| rs11571117 | REN      | A | 0.011 | 0.828 | [0.232,2.963] | 0.772 | 0.795 | [0.101,6.293]    | 0.828 | 0.960 | [0.095,9.693]    | 0.973 | 0.942 |
| rs2074085  | ABCC1    | G | 0.133 | 0.941 | [0.656,1.348] | 0.739 | 0.929 | [0.495,1.745]    | 0.820 | 0.988 | [0.5,1.952]      | 0.973 | 0.930 |
| rs3219484  | MUTYH    | A | 0.052 | 1.420 | [0.868,2.323] | 0.163 | 1.396 | [0.564,3.459]    | 0.471 | 0.984 | [0.379,2.555]    | 0.973 | 0.336 |
| rs2794520  | CRP      | T | 0.320 | 0.816 | [0.636,1.049] | 0.113 | 0.810 | [0.513,1.278]    | 0.365 | 0.992 | [0.608,1.619]    | 0.973 | 0.223 |
| rs2310235  | IL1RL2   | T | 0.299 | 0.858 | [0.661,1.115] | 0.253 | 0.851 | [0.525,1.378]    | 0.512 | 0.991 | [0.591,1.662]    | 0.974 | 0.458 |
| rs16931996 | DUSP13   | C | 0.022 | 0.761 | [0.293,1.978] | 0.576 | 0.000 | [0,,]            | 0.974 | 0.000 | [0,,]            | 0.975 | 0.855 |
| rs8191448  | GSTP1    | T | 0.023 | 0.415 | [0.137,1.257] | 0.120 | 0.000 | [0,,]            | 0.973 | 0.000 | [0,,]            | 0.975 | 0.298 |
| rs983101   | DPYD     | C | 0.009 | 2.096 | [0.612,7.171] | 0.238 | 0.000 | [0,,]            | 0.977 | 0.000 | [0,,]            | 0.976 | 0.499 |
| rs915909   | CYP2E1   | T | 0.018 | 0.994 | [0.38,2.601]  | 0.991 | 0.000 | [0,,]            | 0.976 | 0.000 | [0,,]            | 0.976 | 0.999 |
| rs3793524  | PTPN3    | C | 0.378 | 1.205 | [0.947,1.533] | 0.129 | 1.214 | [0.787,1.872]    | 0.381 | 1.007 | [0.633,1.602]    | 0.976 | 0.253 |
| rs2228065  | ALOX5    | A | 0.016 | 1.626 | [0.7,3.778]   | 0.258 | 0.000 | [0,,]            | 0.977 | 0.000 | [0,,]            | 0.976 | 0.528 |
| rs552926   | DPYD     | G | 0.390 | 1.138 | [0.898,1.444] | 0.285 | 1.146 | [0.754,1.743]    | 0.524 | 1.007 | [0.642,1.58]     | 0.976 | 0.502 |
| rs2227307  | IL8      | G | 0.484 | 0.945 | [0.746,1.197] | 0.640 | 0.939 | [0.617,1.428]    | 0.768 | 0.993 | [0.632,1.561]    | 0.976 | 0.873 |
| rs3739927  | SETX     | G | 0.055 | 0.967 | [0.545,1.716] | 0.909 | 0.952 | [0.353,2.568]    | 0.922 | 0.984 | [0.337,2.87]     | 0.977 | 0.990 |
| rs11879620 | VRK3     | C | 0.031 | 1.494 | [0.742,3.008] | 0.261 | 1.519 | [0.557,4.143]    | 0.414 | 1.017 | [0.333,3.105]    | 0.977 | 0.437 |
| rs6763816  | TNFSF10  | T | 0.009 | 0.599 | [0.124,2.889] | 0.524 | 0.000 | [0,,]            | 0.976 | 0.000 | [0,,]            | 0.977 | 0.816 |
| rs16905649 | PTPRJ    | A | 0.016 | 1.181 | [0.461,3.021] | 0.729 | 0.000 | [0,,]            | 0.977 | 0.000 | [0,,]            | 0.977 | 0.941 |

|            |           |   |       |       |               |       |       |               |       |       |                |       |       |
|------------|-----------|---|-------|-------|---------------|-------|-------|---------------|-------|-------|----------------|-------|-------|
| rs4987875  | ATM       | T | 0.013 | 1.016 | [0.304,3.393] | 0.980 | 0.000 | [0,,]         | 0.977 | 0.000 | [0,,]          | 0.977 | 0.999 |
| rs13815    | MCAT      | C | 0.403 | 0.832 | [0.645,1.073] | 0.156 | 0.838 | [0.521,1.347] | 0.466 | 1.007 | [0.606,1.675]  | 0.977 | 0.315 |
| rs2020873  | MLH1      | T | 0.015 | 0.642 | [0.178,2.312] | 0.498 | 0.663 | [0.087,5.075] | 0.693 | 1.034 | [0.102,10.494] | 0.978 | 0.749 |
| rs2230592  | MST1R     | G | 0.015 | 1.512 | [0.582,3.928] | 0.396 | 0.000 | [0,,]         | 0.979 | 0.000 | [0,,]          | 0.978 | 0.697 |
| rs2270423  | GSTZ1     | A | 0.296 | 0.906 | [0.699,1.175] | 0.457 | 0.913 | [0.555,1.501] | 0.719 | 1.007 | [0.592,1.712]  | 0.979 | 0.732 |
| rs2229653  | SPN       | T | 0.013 | 0.882 | [0.282,2.756] | 0.828 | 0.000 | [0,,]         | 0.979 | 0.000 | [0,,]          | 0.979 | 0.976 |
| rs3136664  | CCR1      | A | 0.015 | 0.914 | [0.332,2.517] | 0.861 | 0.000 | [0,,]         | 0.979 | 0.000 | [0,,]          | 0.979 | 0.985 |
| rs28900388 | UGT1A10   | C | 0.013 | 1.919 | [0.611,6.032] | 0.265 | 0.000 | [0,,]         | 0.980 | 0.000 | [0,,]          | 0.979 | 0.537 |
| rs874401   | LOC729734 | T | 0.209 | 0.964 | [0.728,1.277] | 0.800 | 0.957 | [0.58,1.58]   | 0.865 | 0.993 | [0.58,1.701]   | 0.979 | 0.959 |
| rs6868365  | RAD50     | T | 0.010 | 0.621 | [0.127,3.031] | 0.555 | 0.642 | [0.071,5.817] | 0.694 | 1.035 | [0.079,13.484] | 0.979 | 0.796 |
| rs1056932  | BCL6      | C | 0.413 | 1.173 | [0.922,1.493] | 0.194 | 1.180 | [0.765,1.82]  | 0.454 | 1.006 | [0.633,1.599]  | 0.980 | 0.368 |
| rs663530   | MRE11A    | T | 0.249 | 1.202 | [0.921,1.568] | 0.175 | 1.194 | [0.734,1.943] | 0.475 | 0.993 | [0.592,1.666]  | 0.980 | 0.350 |
| rs496550   | ABCB11    | A | 0.491 | 1.141 | [0.907,1.435] | 0.259 | 1.147 | [0.758,1.737] | 0.515 | 1.006 | [0.645,1.569]  | 0.980 | 0.467 |
| rs169547   | BRCA2     | A | 0.012 | 1.023 | [0.324,3.224] | 0.969 | 0.000 | [0,,]         | 0.980 | 0.000 | [0,,]          | 0.980 | 0.999 |
| rs5742980  | PMS1      | C | 0.012 | 1.169 | [0.352,3.877] | 0.799 | 0.000 | [0,,]         | 0.981 | 0.000 | [0,,]          | 0.981 | 0.968 |
| rs2230635  | CHAF1A    | G | 0.014 | 2.054 | [0.742,5.688] | 0.166 | 0.000 | [0,,]         | 0.982 | 0.000 | [0,,]          | 0.981 | 0.383 |
| rs4253199  | ERCC6     | T | 0.011 | 2.038 | [0.733,5.668] | 0.173 | 0.000 | [0,,]         | 0.982 | 0.000 | [0,,]          | 0.981 | 0.394 |
| rs12072582 | FMO3      | C | 0.014 | 1.529 | [0.542,4.314] | 0.422 | 0.000 | [0,,]         | 0.982 | 0.000 | [0,,]          | 0.981 | 0.724 |
| rs8178318  | LPO       | T | 0.012 | 1.587 | [0.513,4.904] | 0.423 | 0.000 | [0,,]         | 0.982 | 0.000 | [0,,]          | 0.981 | 0.725 |
| rs4765181  | SCARB1    | A | 0.365 | 1.124 | [0.878,1.438] | 0.355 | 1.117 | [0.702,1.778] | 0.641 | 0.994 | [0.605,1.634]  | 0.981 | 0.614 |
| rs3917974  | CSF3R     | G | 0.015 | 0.127 | [0.016,0.998] | 0.050 | 0.000 | [0,,]         | 0.979 | 0.000 | [0,,]          | 0.982 | 0.146 |
| rs9332485  | F5        | A | 0.009 | 1.179 | [0.33,4.215]  | 0.800 | 0.000 | [0,,]         | 0.982 | 0.000 | [0,,]          | 0.982 | 0.968 |
| rs12659    | SLC19A1   | T | 0.424 | 0.896 | [0.707,1.135] | 0.362 | 0.891 | [0.584,1.36]  | 0.593 | 0.995 | [0.632,1.566]  | 0.982 | 0.607 |
| rs6416668  | ABCC6     | T | 0.018 | 1.105 | [0.447,2.727] | 0.829 | 0.000 | [0,,]         | 0.983 | 0.000 | [0,,]          | 0.982 | 0.977 |
| rs3136430  | F2        | T | 0.014 | 0.523 | [0.117,2.344] | 0.397 | 0.000 | [0,,]         | 0.982 | 0.000 | [0,,]          | 0.983 | 0.698 |
| rs246220   | ABCC1     | G | 0.176 | 0.870 | [0.634,1.194] | 0.387 | 0.864 | [0.486,1.537] | 0.618 | 0.993 | [0.535,1.844]  | 0.983 | 0.639 |
| rs16839100 | FCRL2     | T | 0.010 | 1.412 | [0.473,4.215] | 0.536 | 0.000 | [0,,]         | 0.984 | 0.000 | [0,,]          | 0.983 | 0.826 |
| rs2410478  | NAT1      | C | 0.010 | 0.661 | [0.154,2.845] | 0.579 | 0.000 | [0,,]         | 0.983 | 0.000 | [0,,]          | 0.983 | 0.857 |
| rs2142694  | CYP2D6    | A | 0.463 | 0.943 | [0.741,1.2]   | 0.633 | 0.948 | [0.616,1.459] | 0.807 | 1.005 | [0.632,1.597]  | 0.983 | 0.878 |
| rs16836266 | NEK11     | C | 0.110 | 1.521 | [1.041,2.221] | 0.030 | 1.509 | [0.779,2.926] | 0.223 | 0.993 | [0.491,2.007]  | 0.984 | 0.066 |
| rs3808600  | ZHX2      | T | 0.287 | 1.041 | [0.792,1.367] | 0.774 | 1.047 | [0.632,1.732] | 0.859 | 1.006 | [0.587,1.722]  | 0.984 | □□□□  |
| rs3886641  | GARS      | A | 0.010 | 0.576 | [0.127,2.621] | 0.476 | 0.000 | [0,,]         | 0.983 | 0.000 | [0,,]          | 0.984 | 0.775 |
| rs2292566  | EPHX1     | A | 0.143 | 1.120 | [0.815,1.538] | 0.484 | 1.113 | [0.634,1.955] | 0.709 | 0.994 | [0.543,1.82]   | 0.984 | 0.754 |
| rs673      | TNF       | A | 0.011 | 0.259 | [0.034,2.003] | 0.196 | 0.000 | [0,,]         | 0.983 | 0.000 | [0,,]          | 0.984 | 0.433 |
| rs5490     | ICAM1     | C | 0.038 | 1.646 | [0.842,3.218] | 0.145 | 1.662 | [0.603,4.584] | 0.326 | 1.010 | [0.335,3.042]  | 0.986 | 0.268 |
| rs1049007  | BMP2      | A | 0.340 | 1.239 | [0.961,1.597] | 0.099 | 1.233 | [0.783,1.942] | 0.366 | 0.996 | [0.612,1.619]  | 0.986 | 0.205 |
| rs2472680  | NR1I2     | T | 0.082 | 0.831 | [0.465,1.484] | 0.531 | 0.839 | [0.298,2.364] | 0.740 | 1.010 | [0.327,3.121]  | 0.987 | 0.794 |
| rs472614   | ABCB11    | A | 0.444 | 1.074 | [0.855,1.348] | 0.540 | 1.078 | [0.714,1.626] | 0.722 | 1.004 | [0.645,1.561]  | 0.987 | 0.799 |
| rs3136682  | CCL1      | T | 0.033 | 1.265 | [0.67,2.389]  | 0.469 | 1.253 | [0.412,3.807] | 0.691 | 0.990 | [0.302,3.25]   | 0.987 | 0.739 |
| rs1801020  | F12       | T | 0.305 | 1.086 | [0.844,1.398] | 0.521 | 1.082 | [0.687,1.703] | 0.734 | 0.996 | [0.612,1.62]   | 0.988 | 0.789 |
| rs8187858  | ABCC1     | T | 0.080 | 0.992 | [0.646,1.524] | 0.971 | 0.986 | [0.452,2.15]  | 0.971 | 0.993 | [0.43,2.298]   | 0.988 | 0.999 |

|            |              |   |       |       |               |       |       |               |       |       |               |       |       |
|------------|--------------|---|-------|-------|---------------|-------|-------|---------------|-------|-------|---------------|-------|-------|
| rs3021094  | IL10         | C | 0.086 | 0.796 | [0.511,1.24]  | 0.314 | 0.791 | [0.346,1.805] | 0.577 | 0.993 | [0.408,2.417] | 0.988 | 0.546 |
| rs2802269  | CDC42BPA     | G | 0.089 | 0.911 | [0.609,1.361] | 0.648 | 0.916 | [0.442,1.899] | 0.814 | 1.006 | [0.458,2.207] | 0.988 | 0.887 |
| rs3024944  | STAT6        | C | 0.014 | 1.259 | [0.403,3.935] | 0.692 | 1.276 | [0.28,5.816]  | 0.753 | 1.013 | [0.177,5.794] | 0.988 | 0.895 |
| rs1934963  | CYP2C9       | C | 0.180 | 0.833 | [0.608,1.139] | 0.252 | 0.836 | [0.466,1.502] | 0.550 | 1.005 | [0.534,1.889] | 0.989 | 0.465 |
| rs725349   | HGF          | T | 0.238 | 1.038 | [0.78,1.38]   | 0.800 | 1.042 | [0.628,1.727] | 0.875 | 1.004 | [0.582,1.732] | 0.989 | 0.961 |
| rs759853   | AKR1B1       | A | 0.386 | 0.979 | [0.768,1.248] | 0.866 | 0.982 | [0.637,1.514] | 0.936 | 1.003 | [0.63,1.598]  | 0.990 | 0.984 |
| rs3093057  | CSF1         | T | 0.329 | 0.996 | [0.772,1.285] | 0.976 | 0.999 | [0.624,1.601] | 0.998 | 1.003 | [0.606,1.661] | 0.990 | 1.000 |
| rs10521092 | IKBKAP       | T | 0.038 | 1.586 | [0.768,3.275] | 0.213 | 1.598 | [0.542,4.709] | 0.396 | 1.008 | [0.302,3.361] | 0.990 | 0.369 |
| rs3136794  | POLB         | G | 0.210 | 0.919 | [0.659,1.284] | 0.622 | 0.923 | [0.514,1.658] | 0.789 | 1.004 | [0.533,1.891] | 0.990 | 0.867 |
| rs2236654  | IGHMBP2      | A | 0.216 | 0.877 | [0.652,1.181] | 0.389 | 0.881 | [0.507,1.529] | 0.651 | 1.004 | [0.555,1.815] | 0.991 | 0.650 |
| rs592792   | GSTM2        | A | 0.143 | 0.980 | [0.692,1.387] | 0.910 | 0.976 | [0.525,1.817] | 0.940 | 0.996 | [0.509,1.949] | 0.991 | 0.992 |
| rs4252749  | CCNI         | C | 0.026 | 1.210 | [0.551,2.661] | 0.635 | 1.201 | [0.357,4.047] | 0.767 | 0.992 | [0.258,3.824] | 0.991 | 0.870 |
| rs43038    | PON2         | G | 0.162 | 1.049 | [0.76,1.448]  | 0.771 | 1.052 | [0.594,1.866] | 0.861 | 1.003 | [0.541,1.859] | 0.992 | 0.950 |
| rs4766002  | C12orf32     | T | 0.434 | 1.101 | [0.865,1.401] | 0.434 | 1.099 | [0.708,1.705] | 0.675 | 0.998 | [0.623,1.598] | 0.993 | 0.701 |
| rs773902   | F2RL3        | A | 0.245 | 0.877 | [0.65,1.184]  | 0.392 | 0.875 | [0.505,1.516] | 0.634 | 0.998 | [0.552,1.803] | 0.993 | 0.647 |
| rs2020903  | CASP9        | C | 0.444 | 1.223 | [0.968,1.544] | 0.091 | 1.225 | [0.799,1.878] | 0.353 | 1.002 | [0.633,1.585] | 0.994 | 0.187 |
| rs699517   | ENOSF1       | T | 0.370 | 0.940 | [0.736,1.199] | 0.616 | 0.941 | [0.605,1.464] | 0.788 | 1.002 | [0.624,1.609] | 0.994 | 0.864 |
| rs1005230  | VEGFA        | T | 0.437 | 1.049 | [0.829,1.327] | 0.690 | 1.051 | [0.676,1.632] | 0.826 | 1.001 | [0.625,1.603] | 0.995 | 0.911 |
| rs1822017  | DCBLD2       | T | 0.157 | 0.931 | [0.668,1.296] | 0.670 | 0.932 | [0.514,1.691] | 0.818 | 1.002 | [0.528,1.903] | 0.995 | 0.899 |
| rs6041884  | FKBP1A       | G | 0.290 | 1.030 | [0.804,1.32]  | 0.815 | 1.029 | [0.653,1.621] | 0.903 | 0.999 | [0.614,1.623] | 0.996 | 0.969 |
| rs610899   | MRE11A       | G | 0.421 | 0.998 | [0.789,1.263] | 0.988 | 0.997 | [0.65,1.531]  | 0.990 | 0.999 | [0.632,1.58]  | 0.997 | 1.000 |
| rs4646032  | CASP9        | C | 0.444 | 1.218 | [0.965,1.538] | 0.097 | 1.219 | [0.795,1.869] | 0.363 | 1.001 | [0.633,1.584] | 0.997 | 0.198 |
| rs1866389  | LOC100129870 | G | 0.194 | 0.953 | [0.709,1.28]  | 0.748 | 0.954 | [0.559,1.626] | 0.862 | 1.001 | [0.565,1.775] | 0.997 | 0.942 |
| rs1205     | CRP          | T | 0.313 | 0.814 | [0.632,1.048] | 0.111 | 0.813 | [0.513,1.289] | 0.378 | 0.999 | [0.609,1.638] | 0.997 | 0.224 |
| rs757081   | NUCB2        | C | 0.293 | 1.102 | [0.85,1.429]  | 0.461 | 1.104 | [0.686,1.775] | 0.685 | 1.001 | [0.602,1.665] | 0.997 | 0.728 |
| rs10410075 | VRK3         | A | 0.031 | 1.457 | [0.723,2.936] | 0.292 | 1.456 | [0.53,3.997]  | 0.466 | 0.999 | [0.324,3.077] | 0.998 | 0.493 |
| rs7006788  | C8orf42      | T | 0.340 | 1.005 | [0.784,1.287] | 0.972 | 1.005 | [0.643,1.571] | 0.983 | 1.000 | [0.619,1.616] | 0.999 | 0.999 |
| rs26312    | GHRL         | A | 0.150 | 0.847 | [0.597,1.201] | 0.351 | 0.847 | [0.455,1.578] | 0.601 | 1.000 | [0.51,1.964]  | 0.999 | 0.595 |
